# Supplementary material for: Functional requirements driving the gene duplication in 12 Drosophila species
Source: PubMed Central journal article supplement (PMC3751352; doi:10.1186/1471-2164-14-555), 2013-08-15

**A**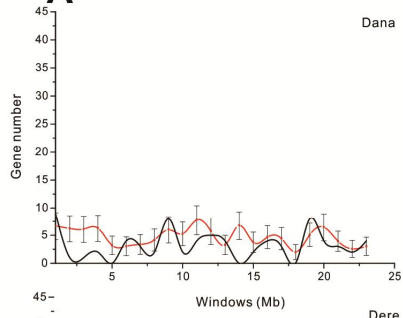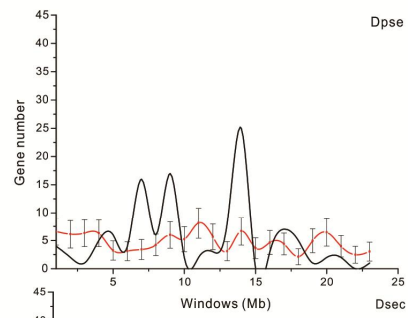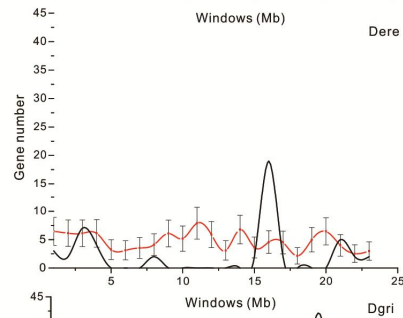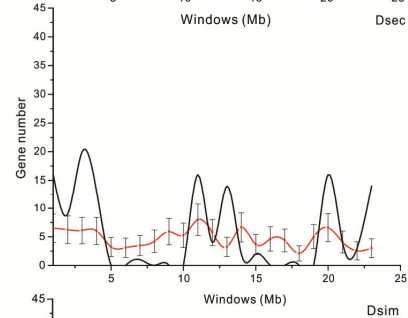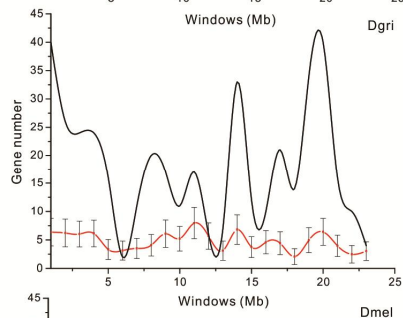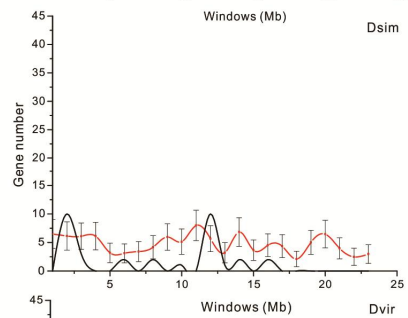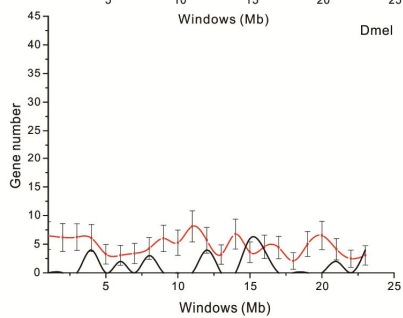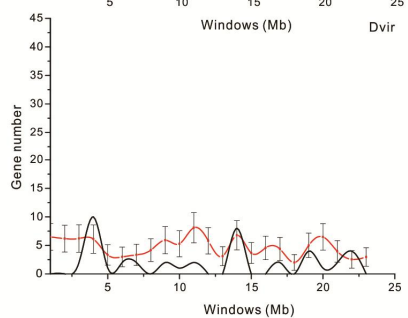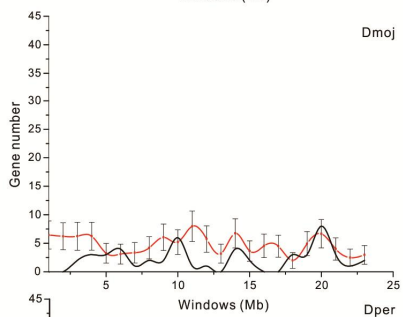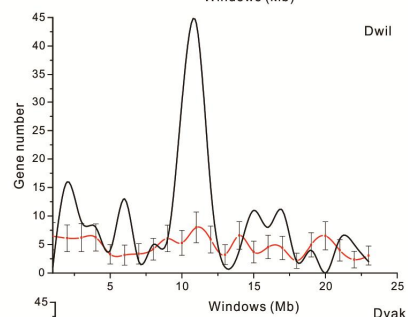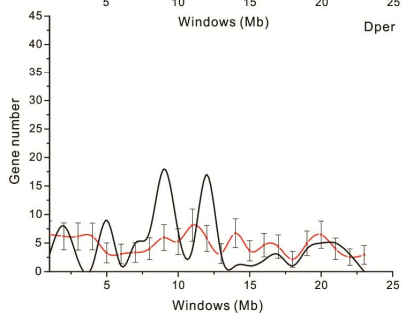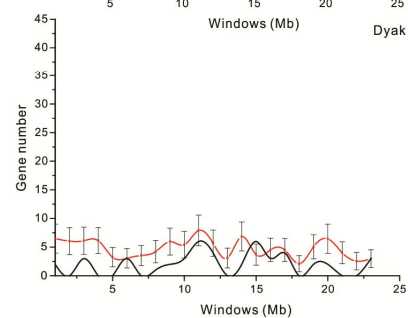

**B**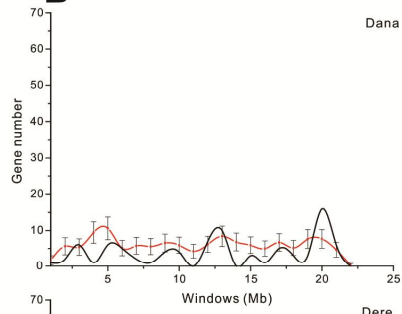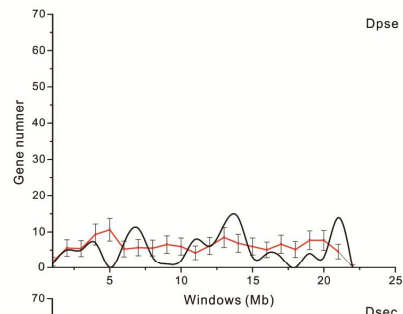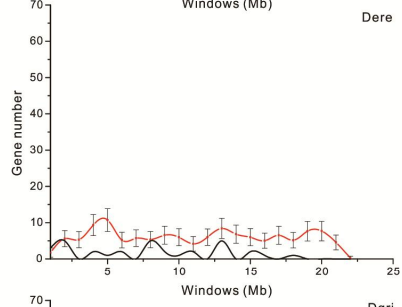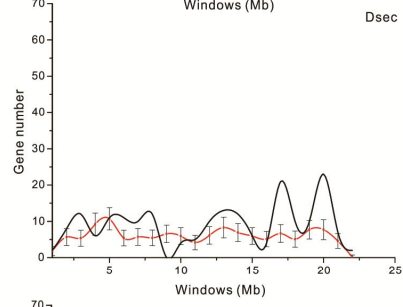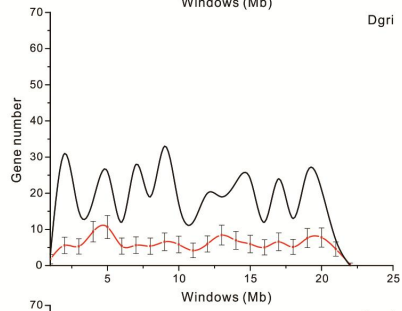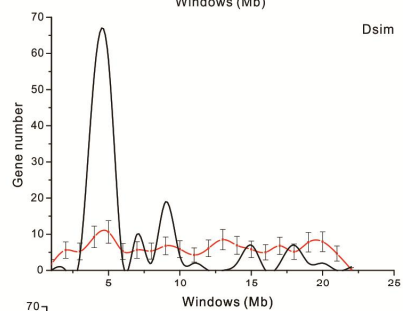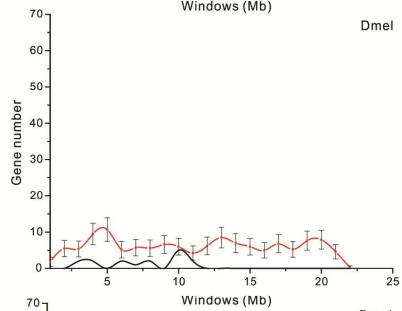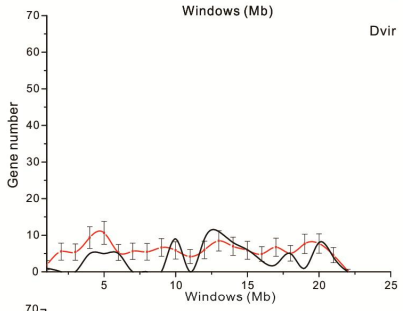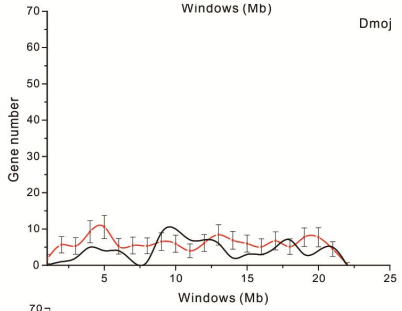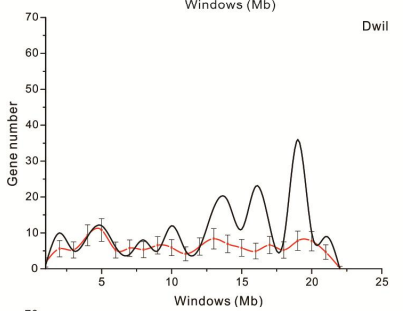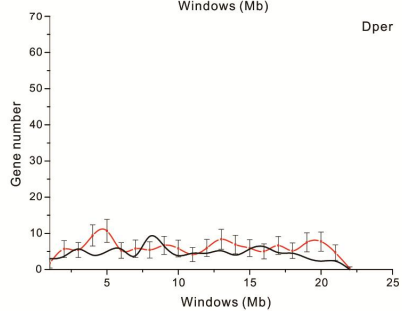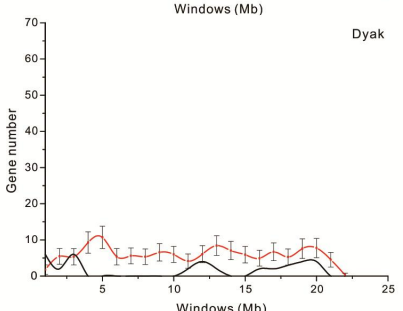

**C**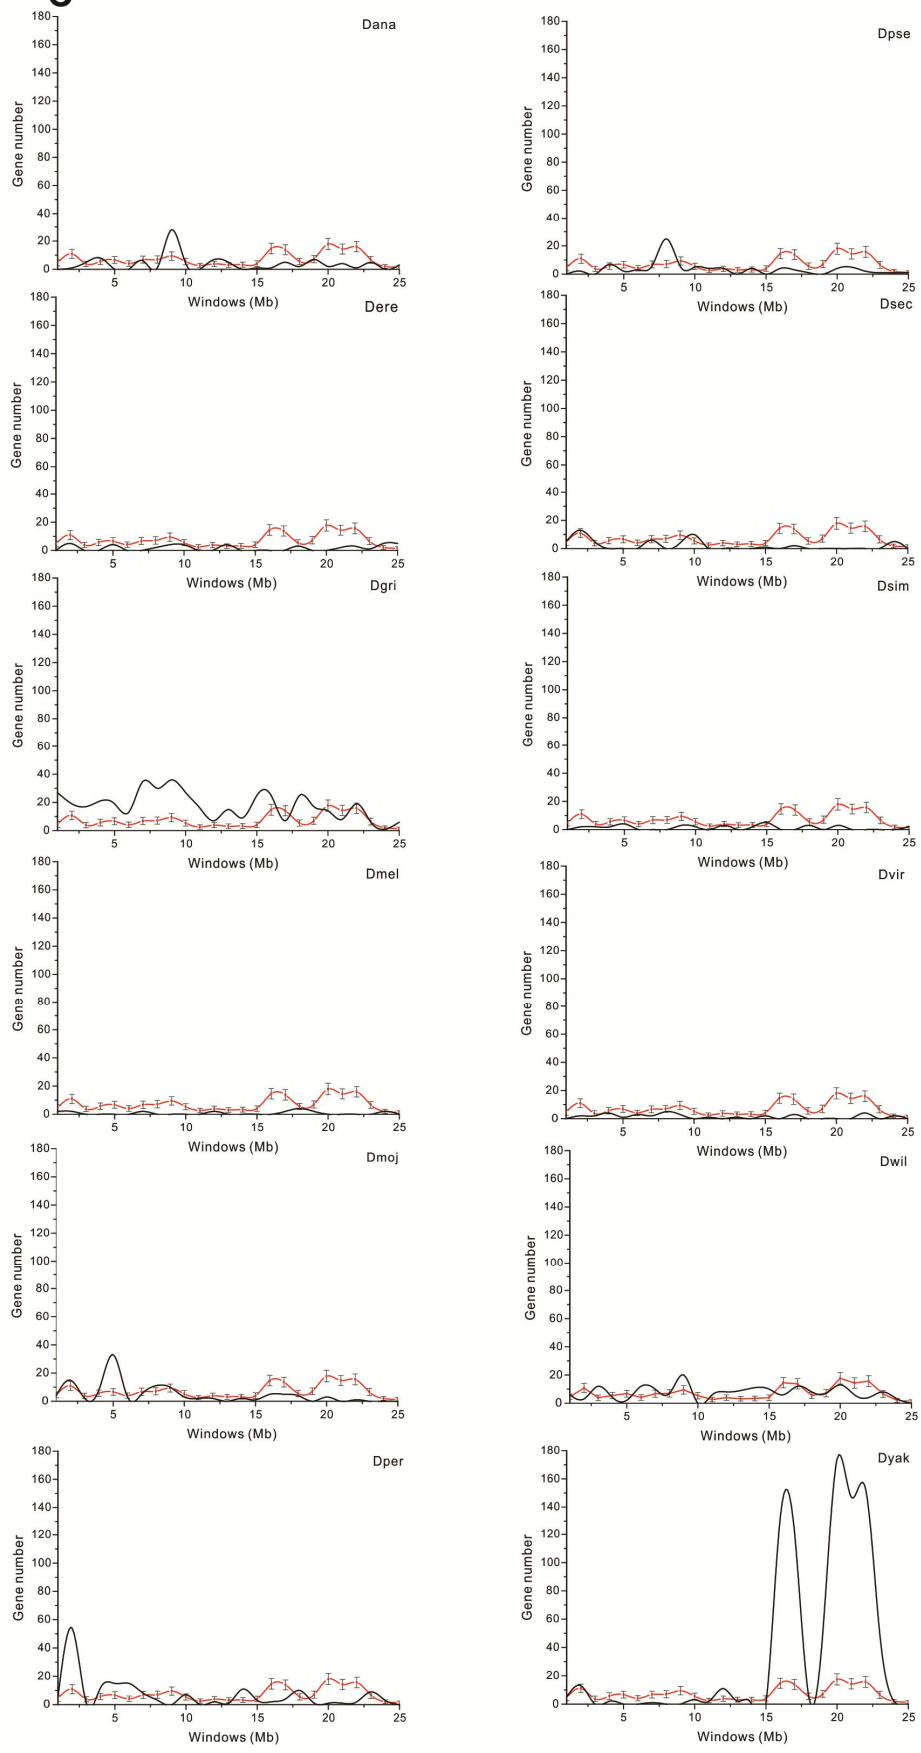



**E**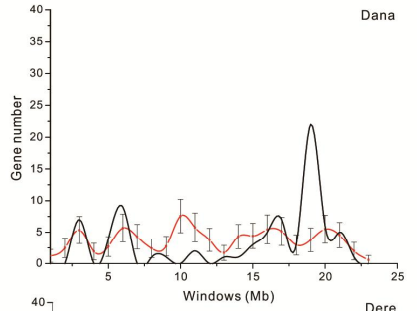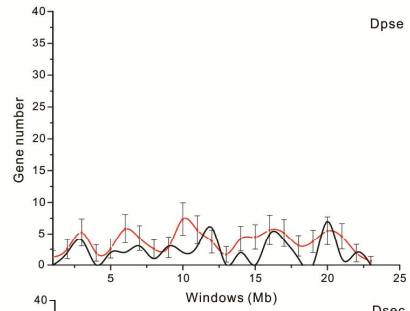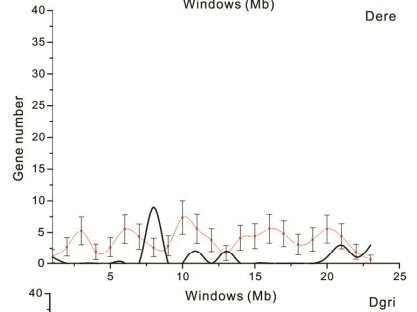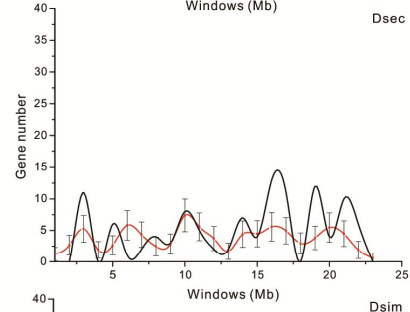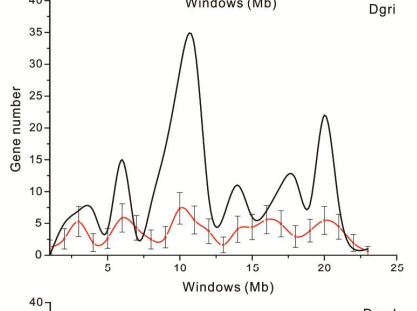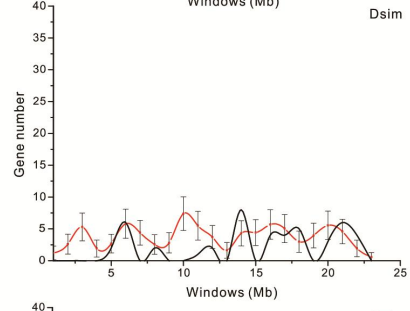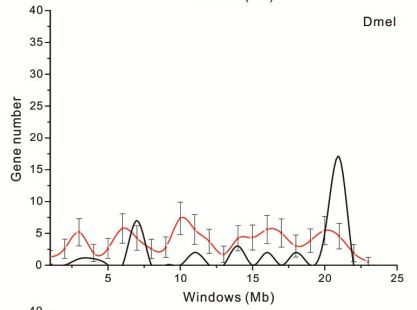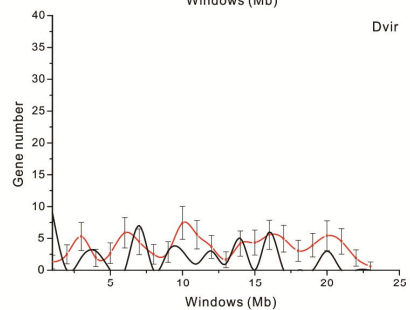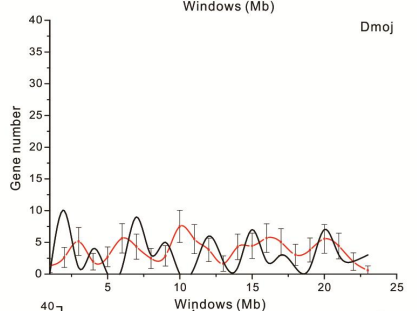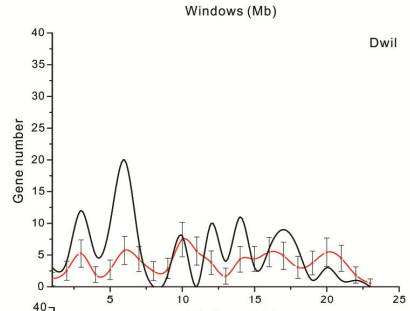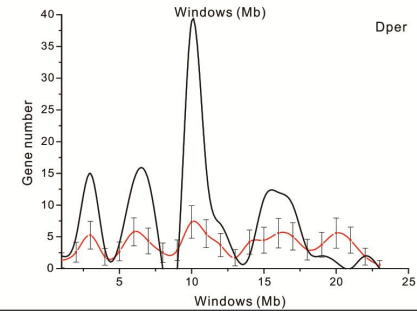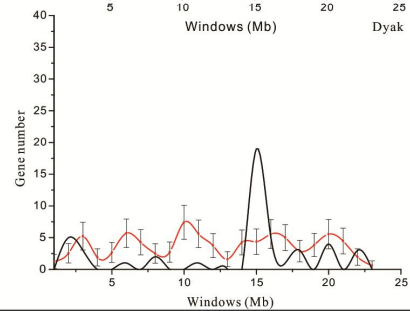

**F**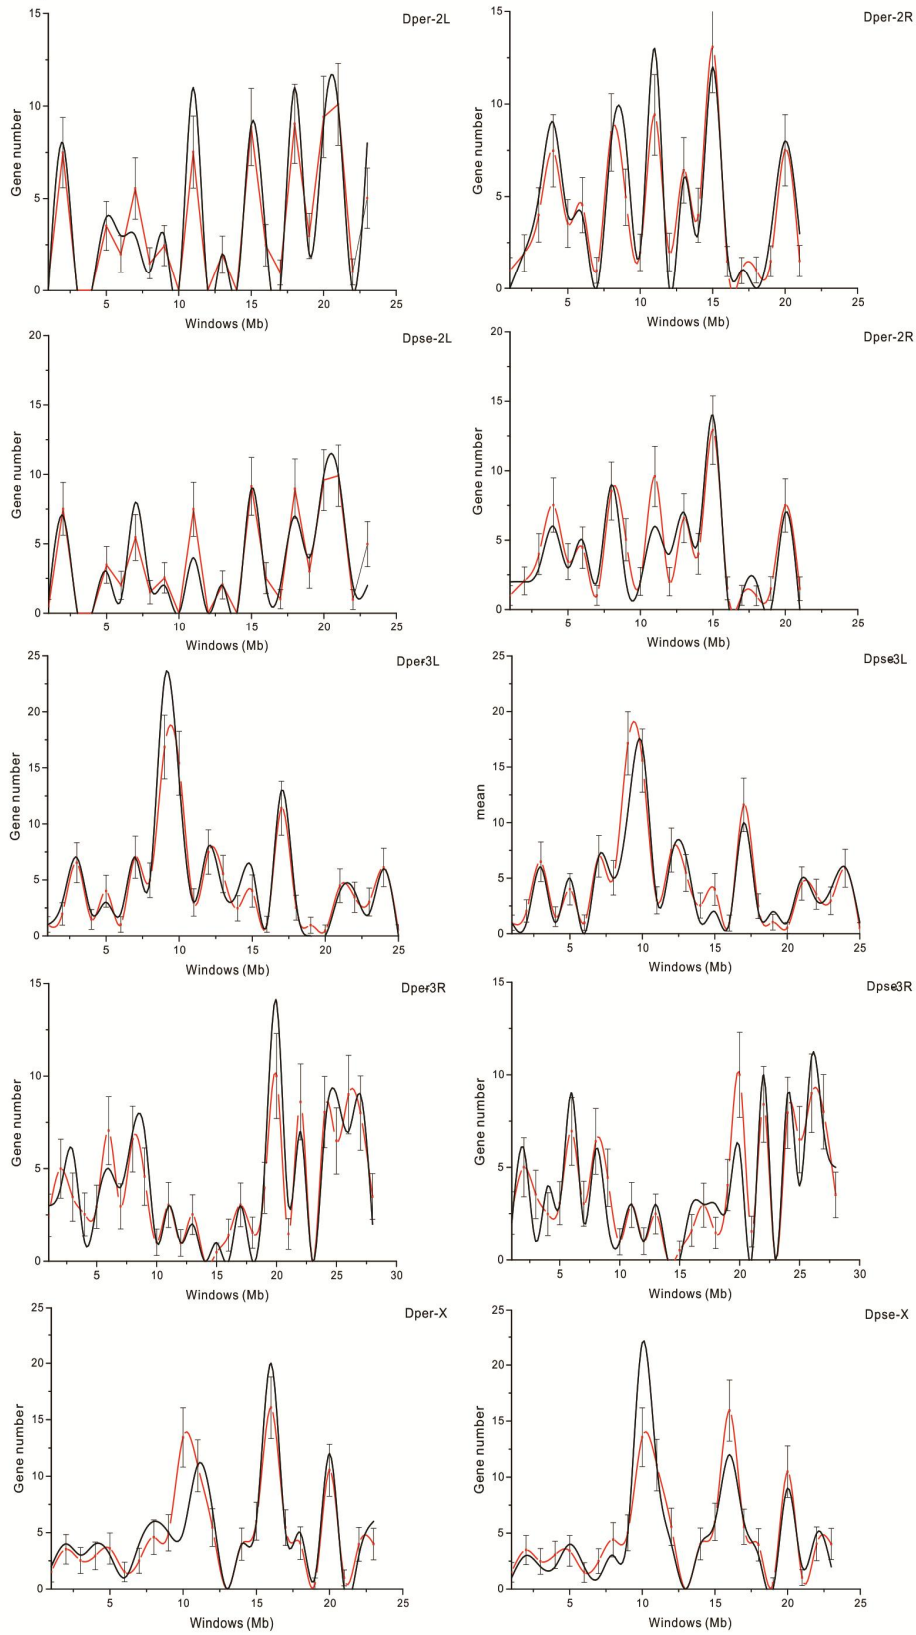

**G**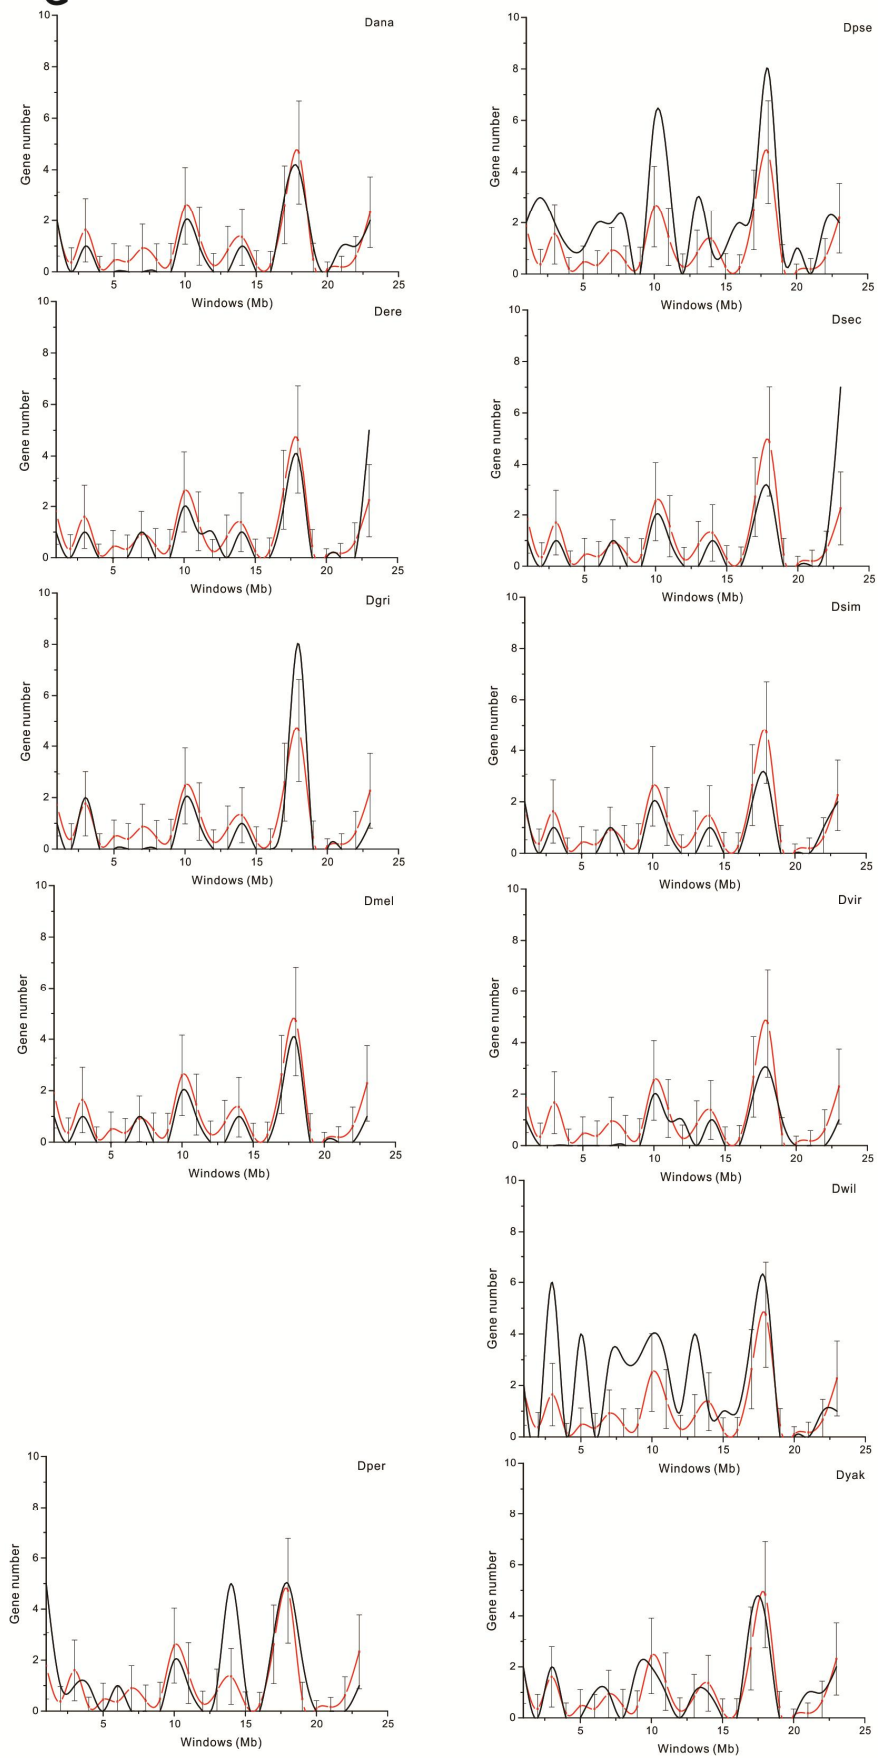

**H**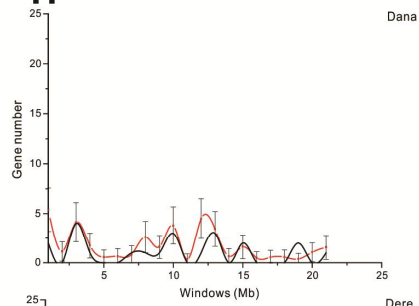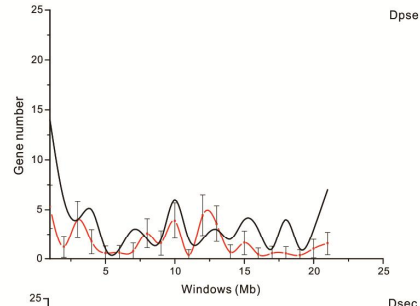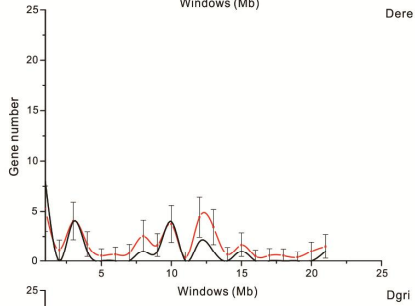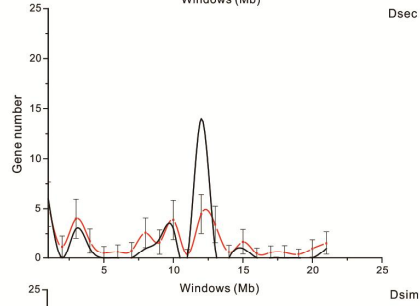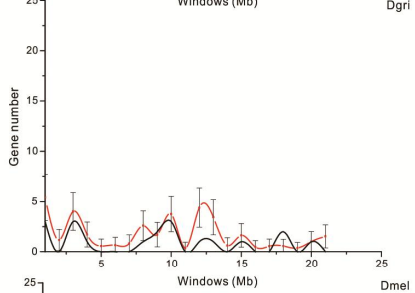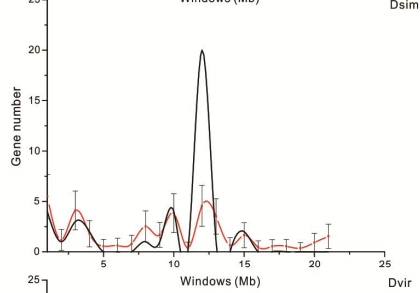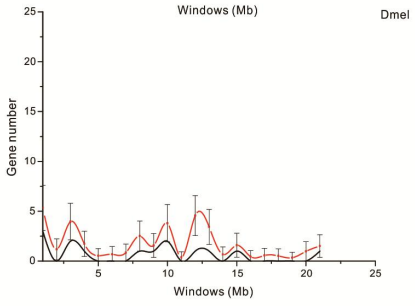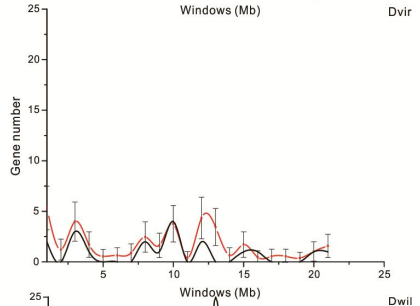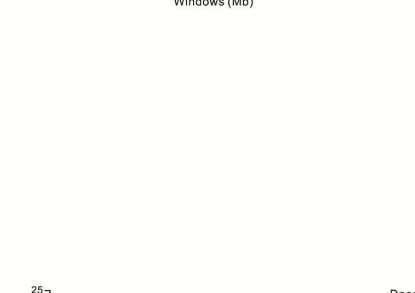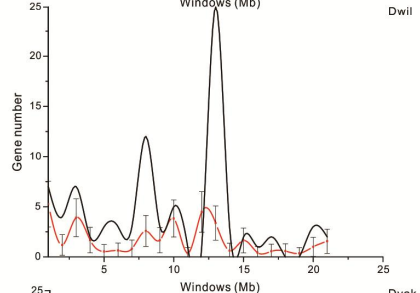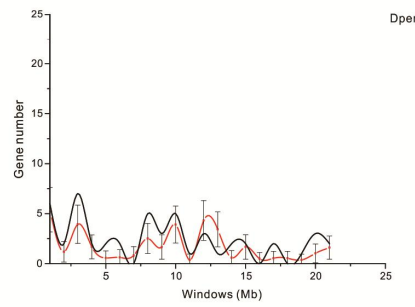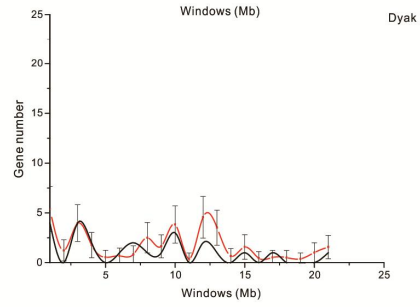



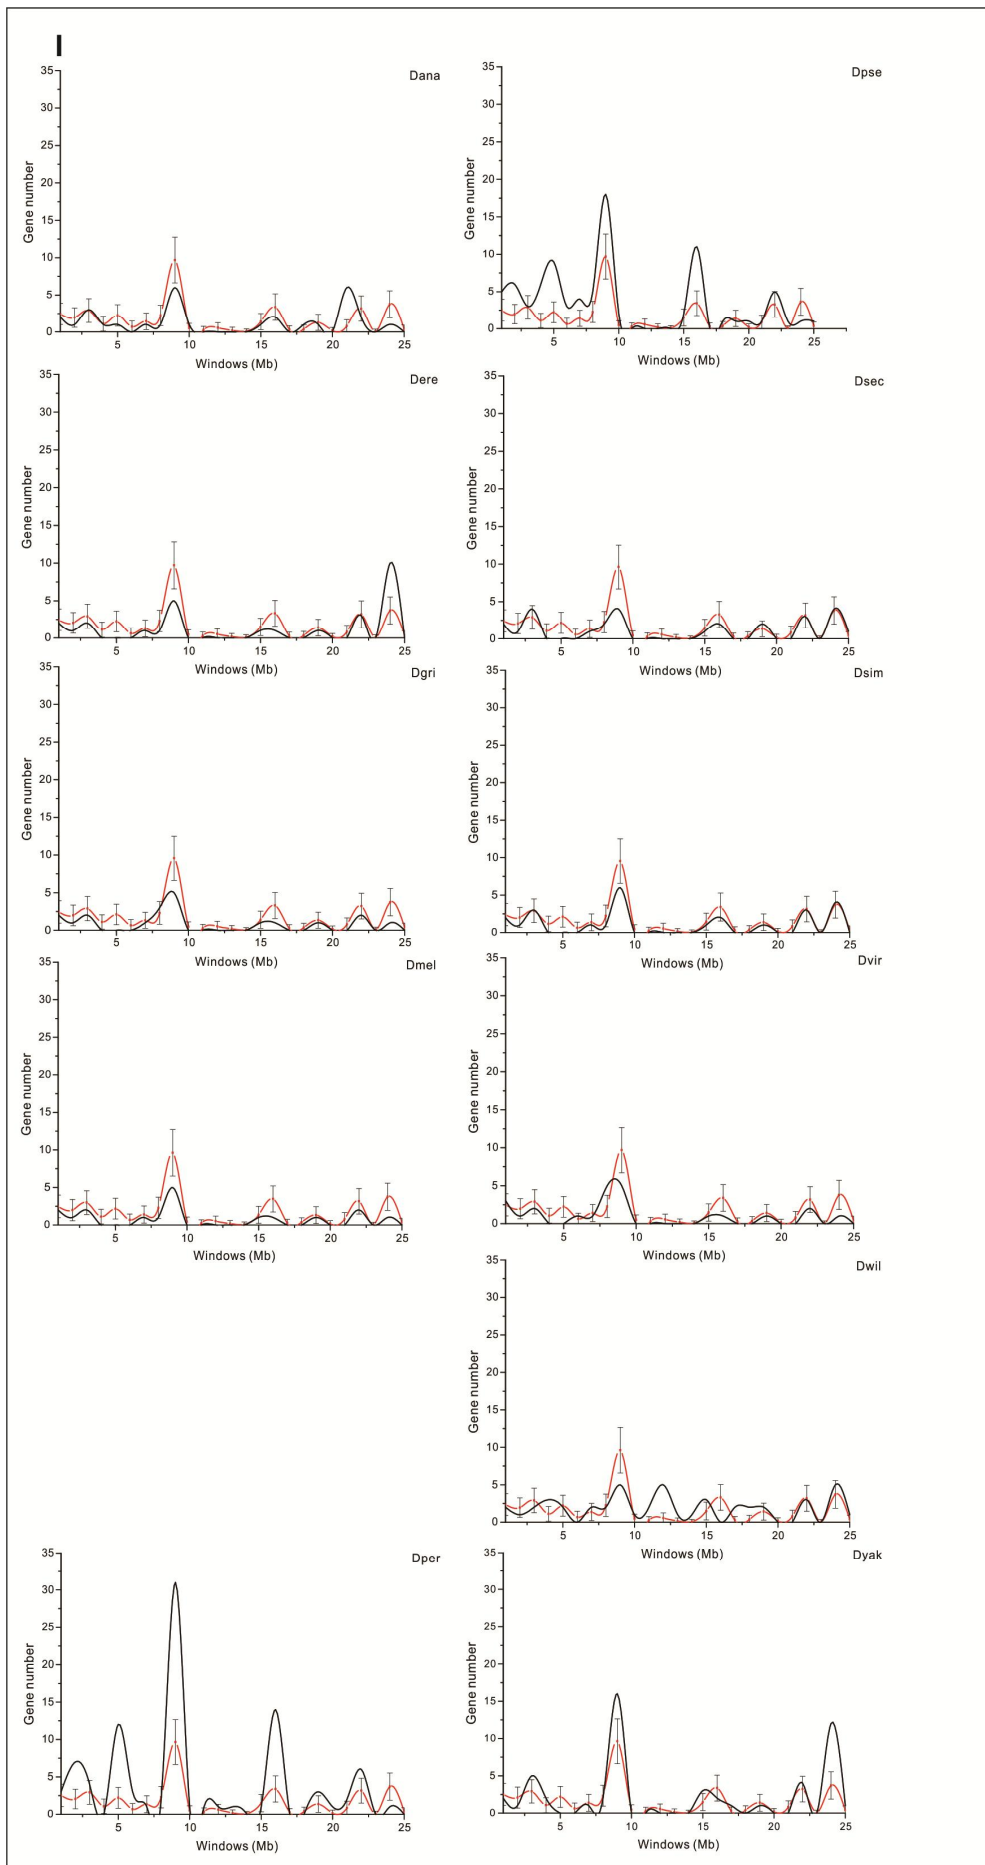

**J**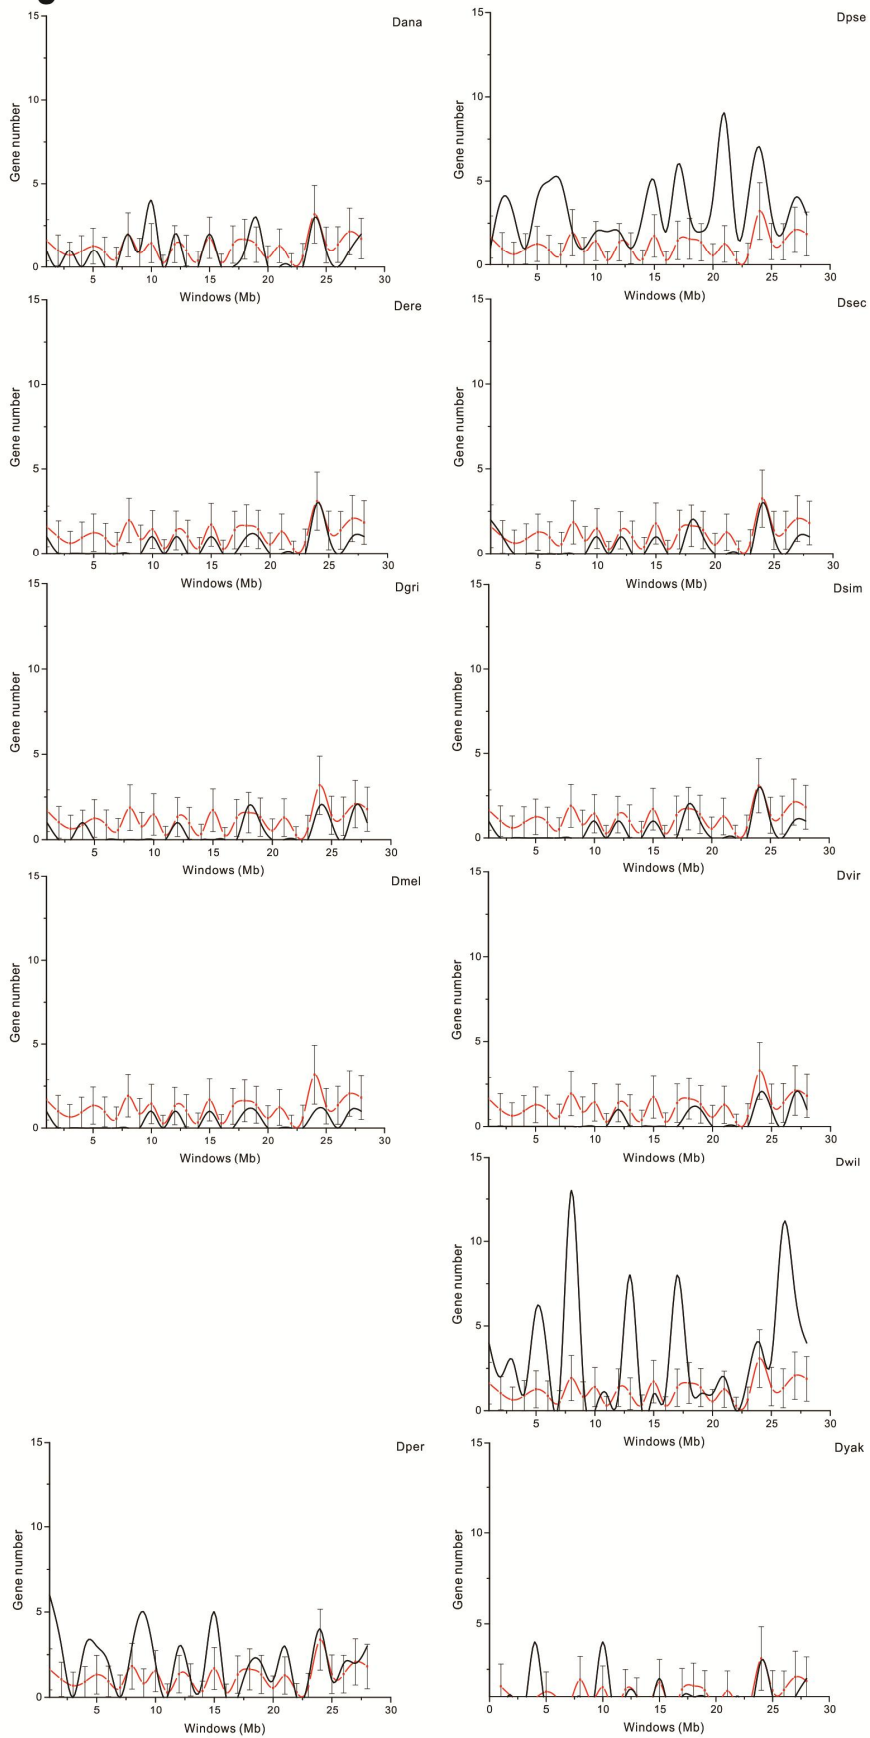

**K**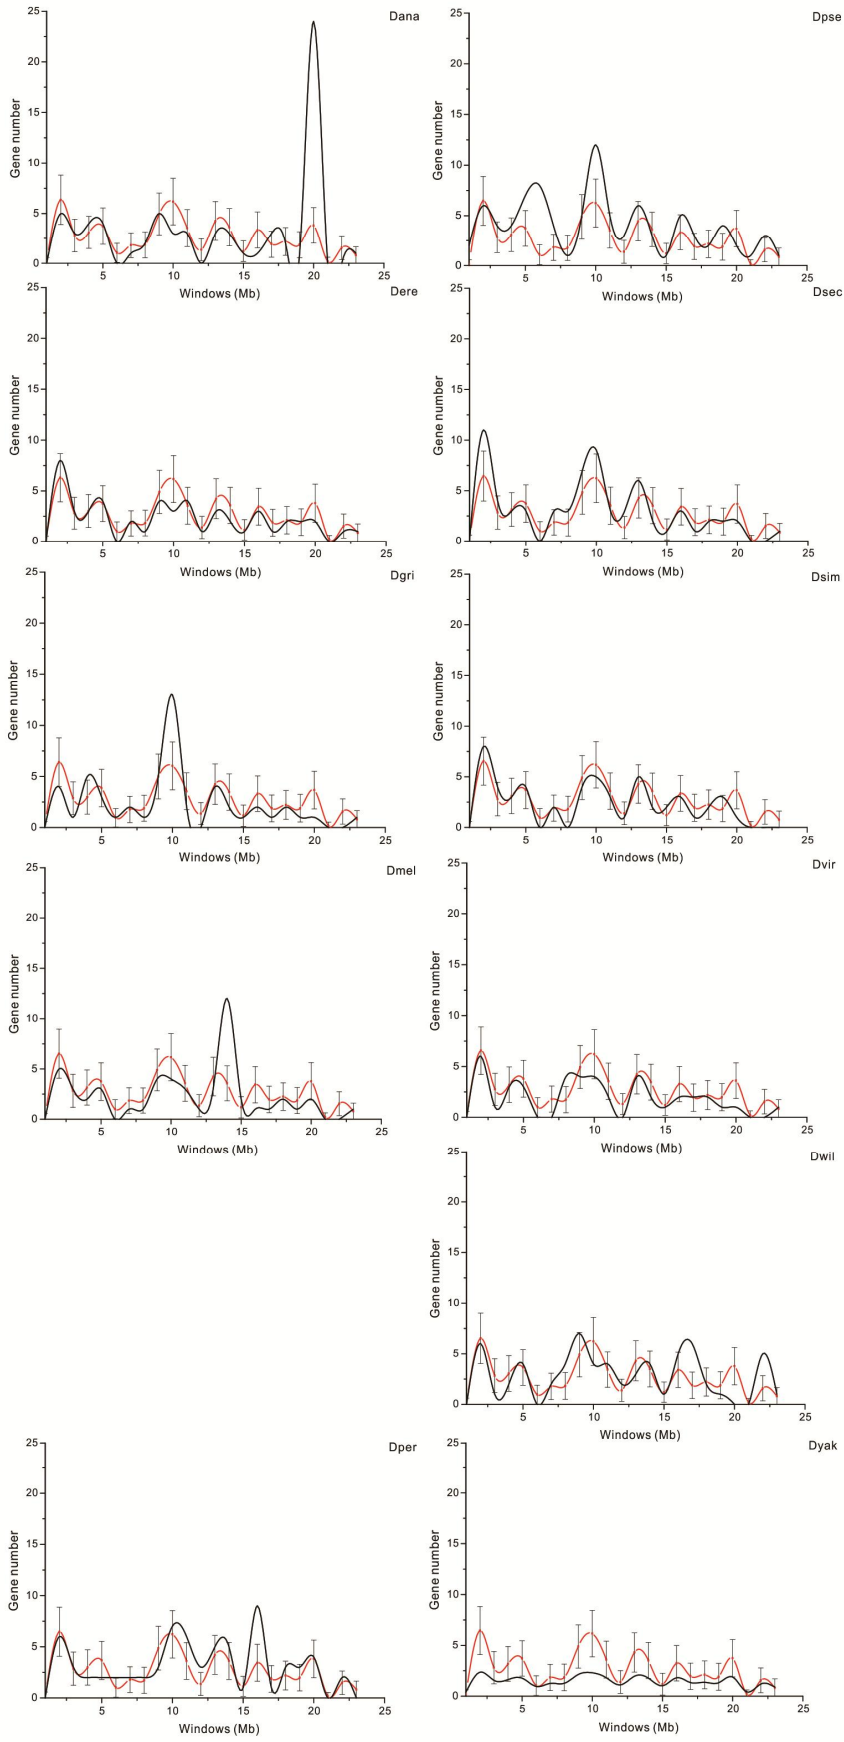

Supplement: 1471-2164-14-555-S2.pdf [file 1471-2164-14-555-S2.pdf]
