# Supplementary material for: Functional requirements driving the gene duplication in 12 Drosophila species
Source: PubMed Central journal article supplement (PMC3751352; doi:10.1186/1471-2164-14-555), 2013-08-15
Supplement: 1471-2164-14-555-S1.pdf [file 1471-2164-14-555-S1.pdf]

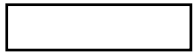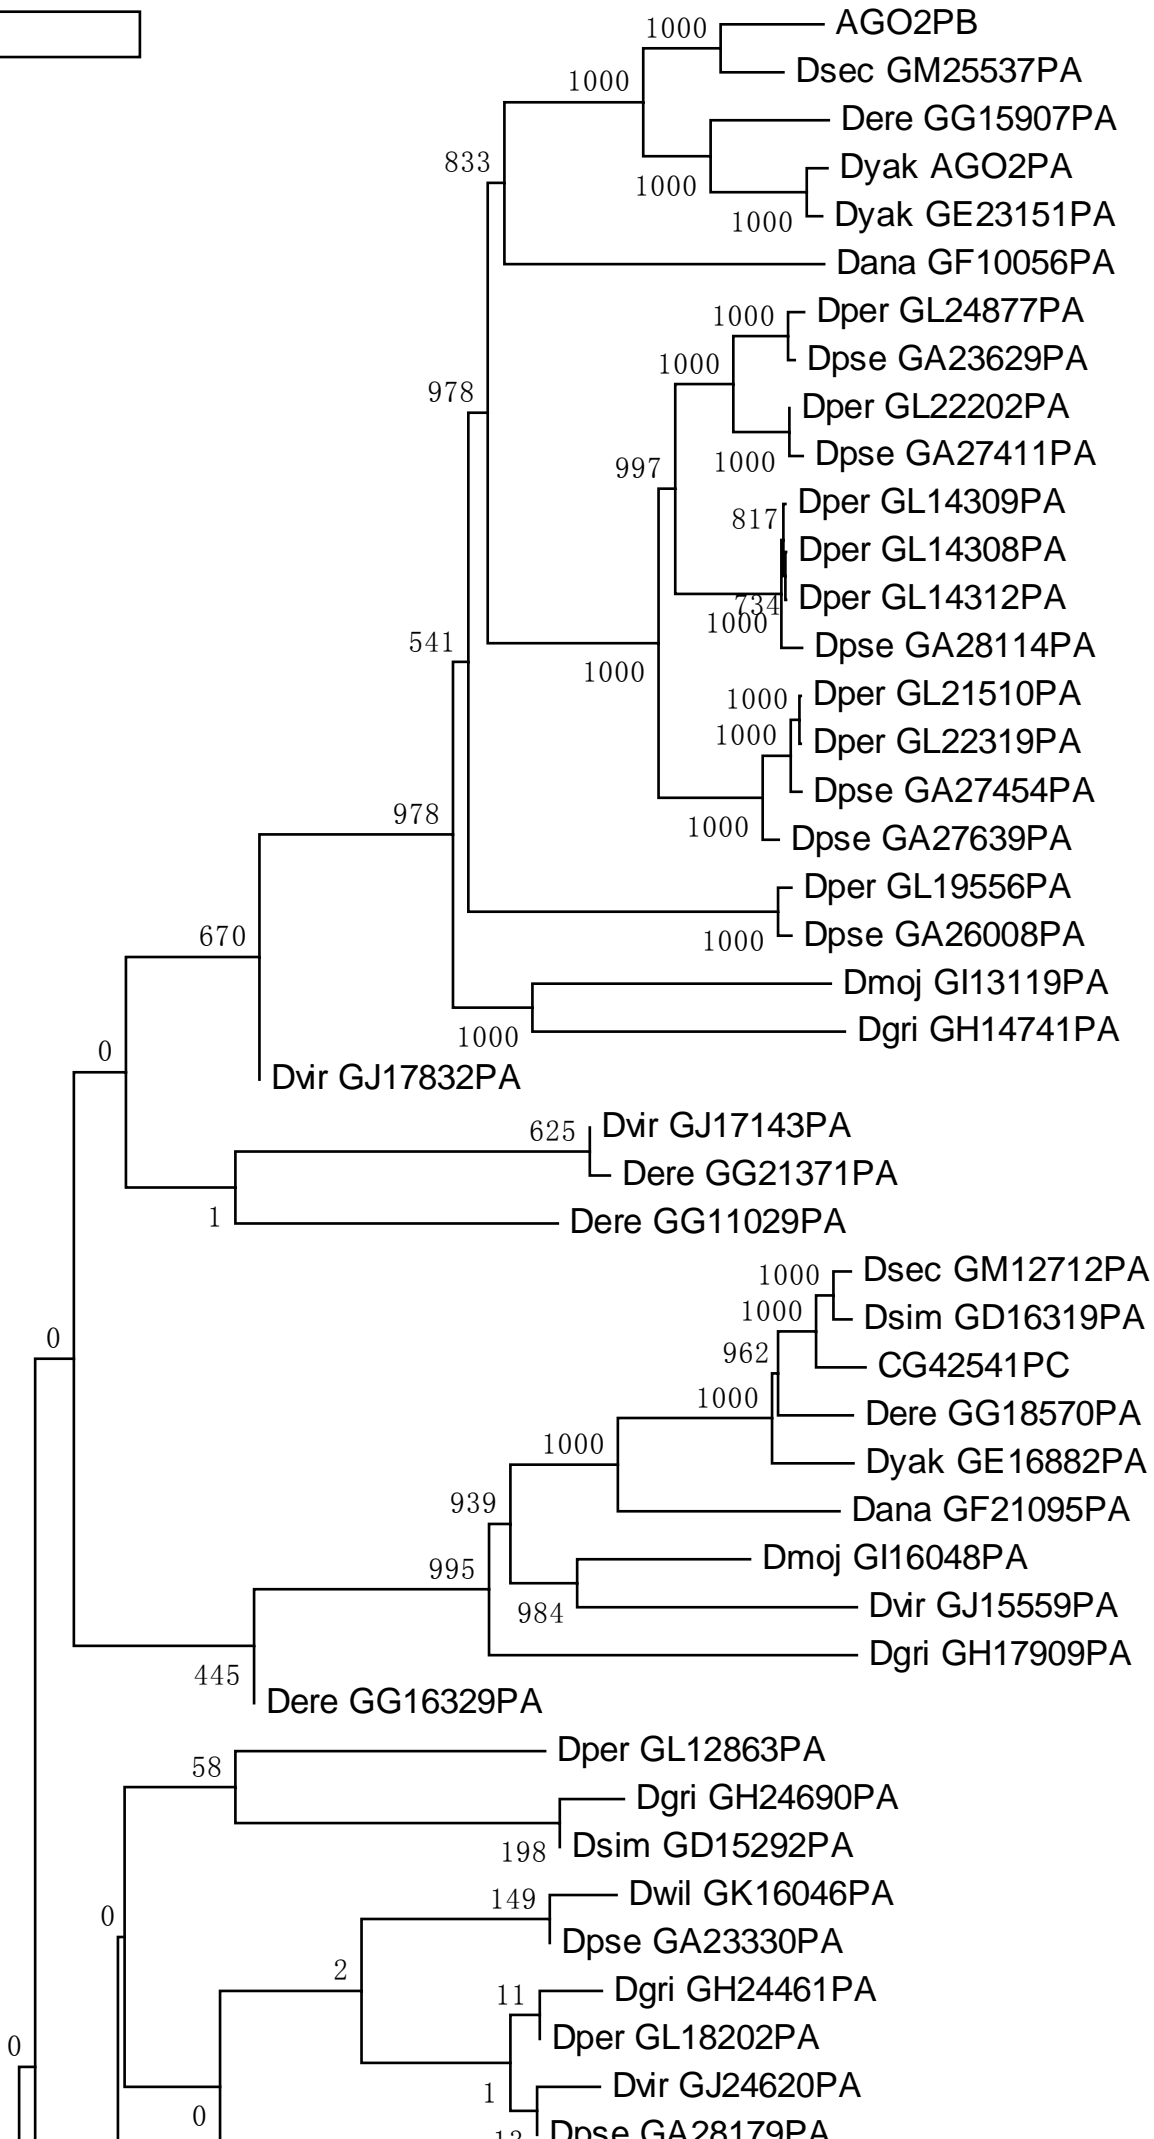

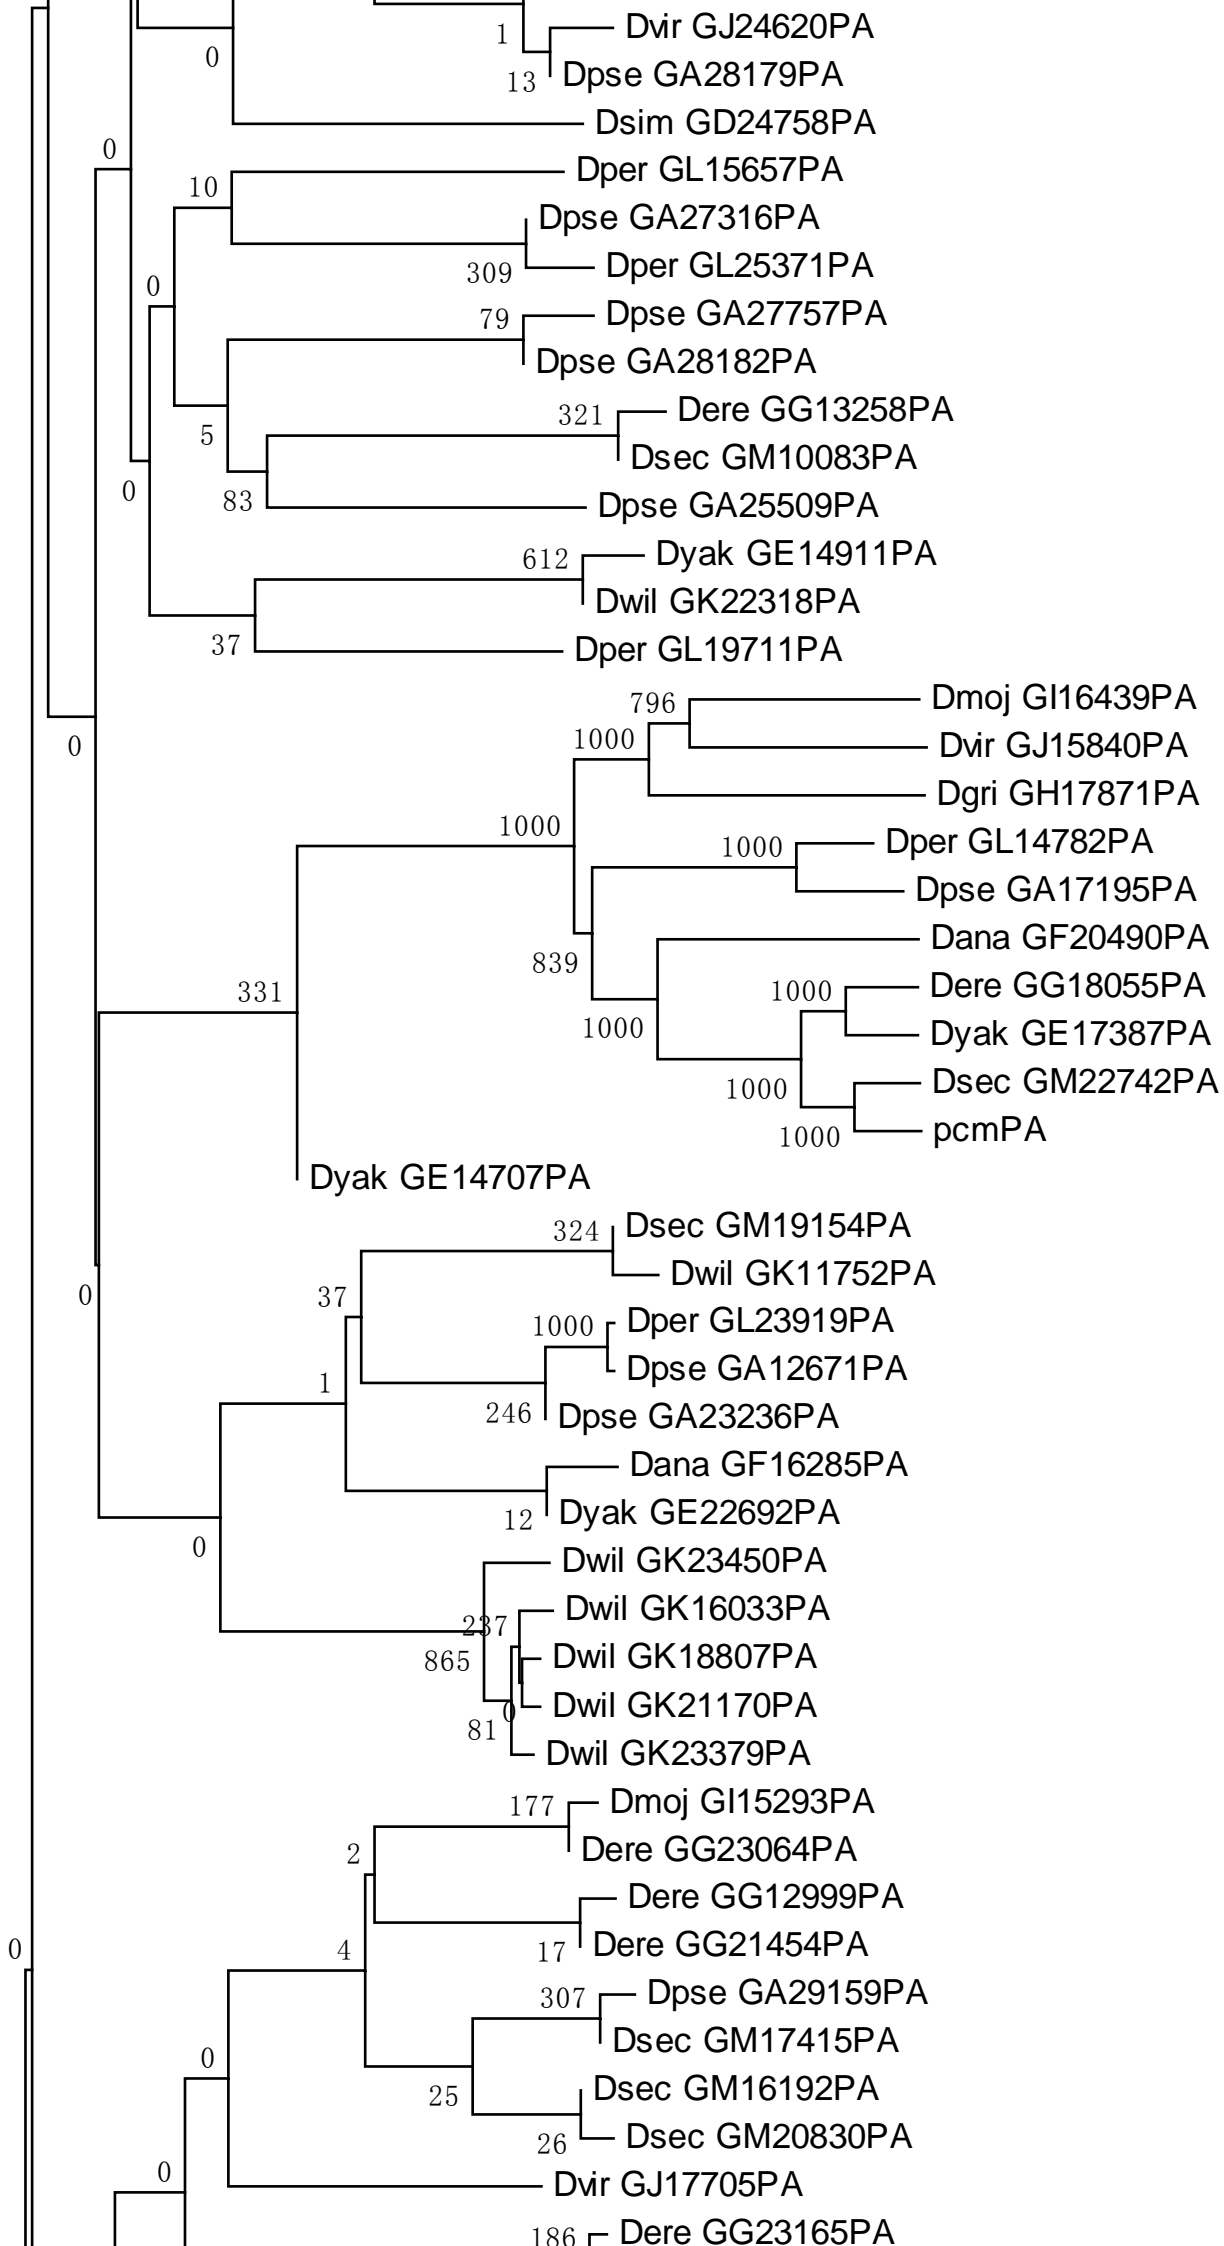

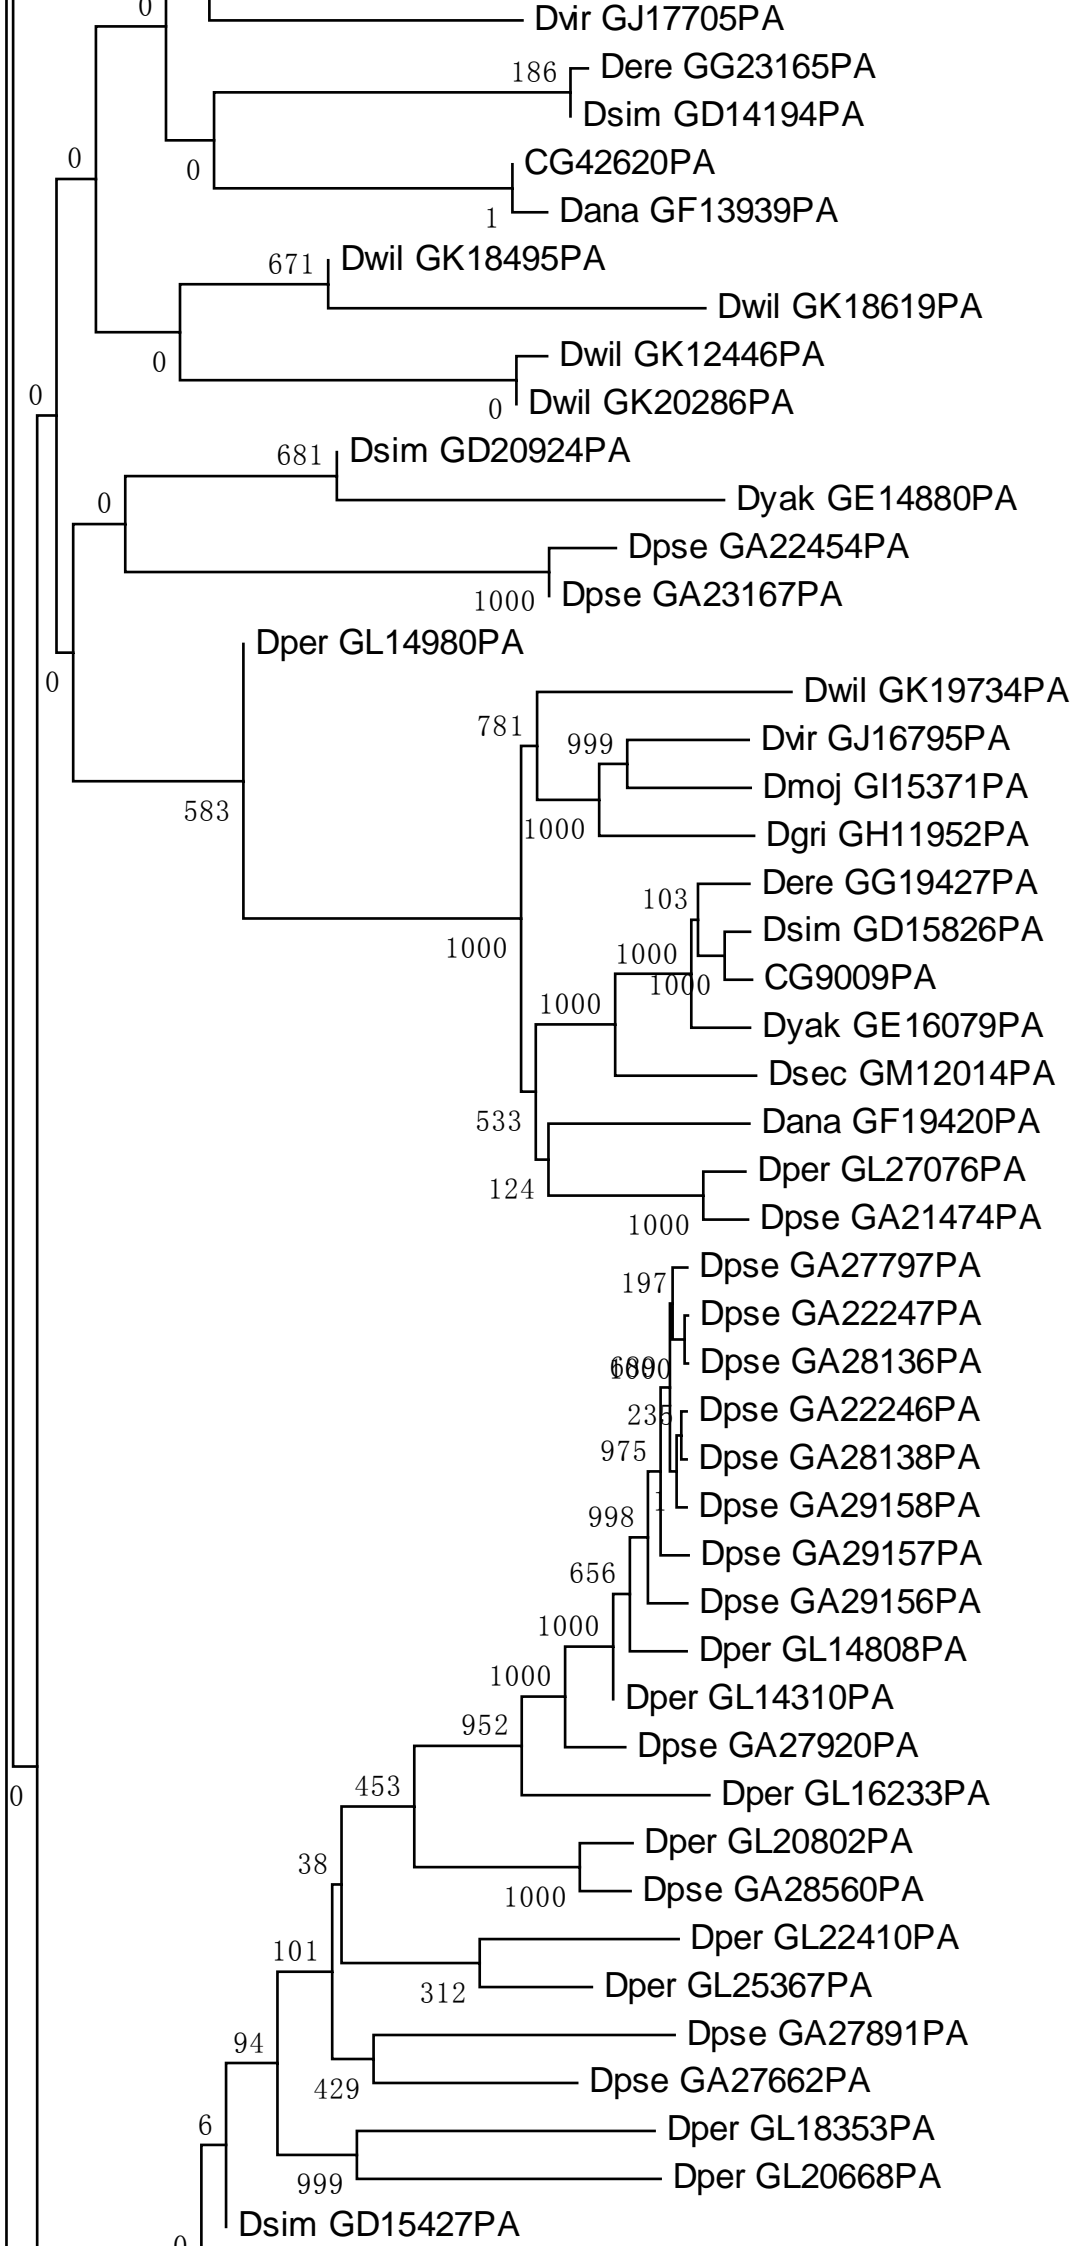

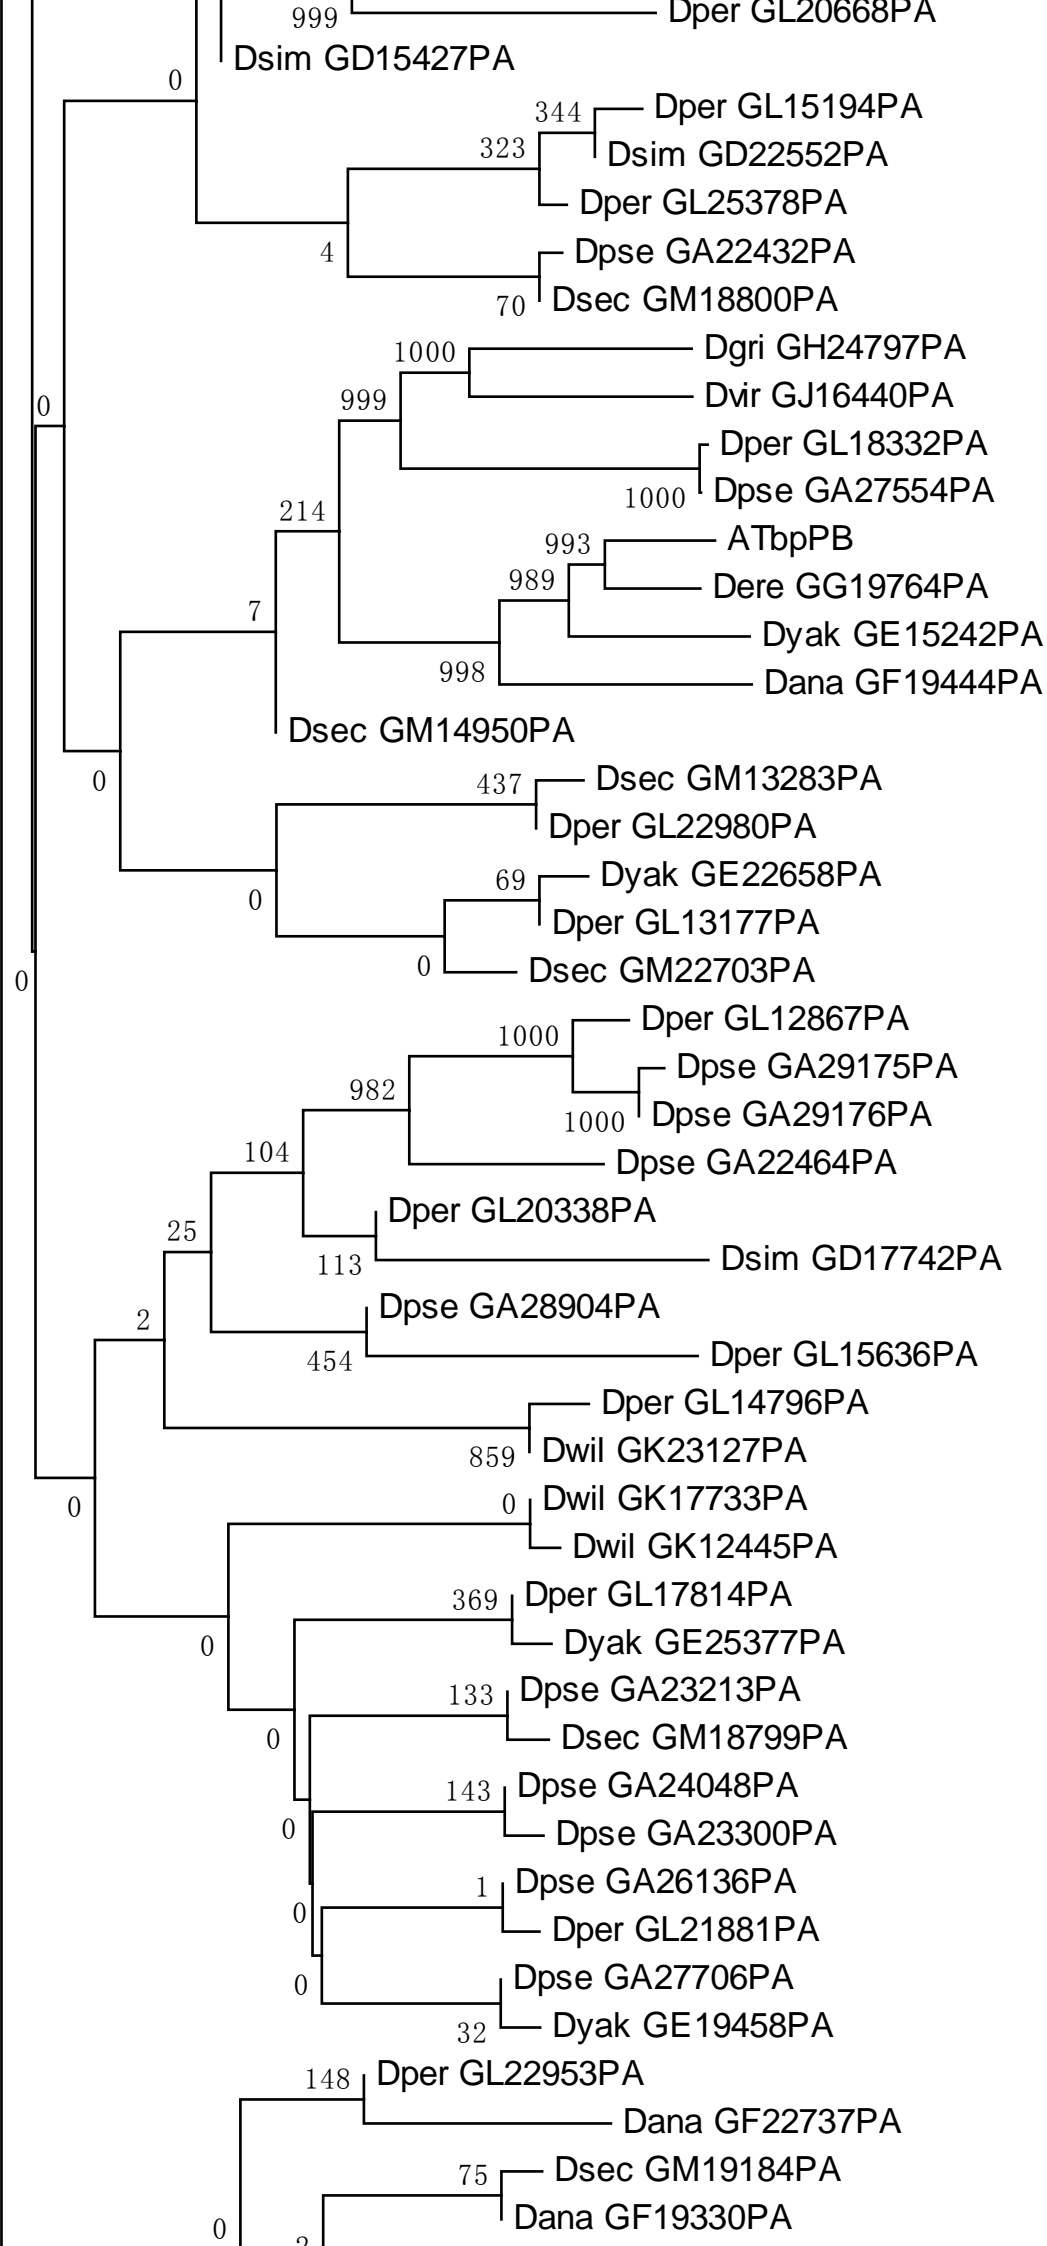

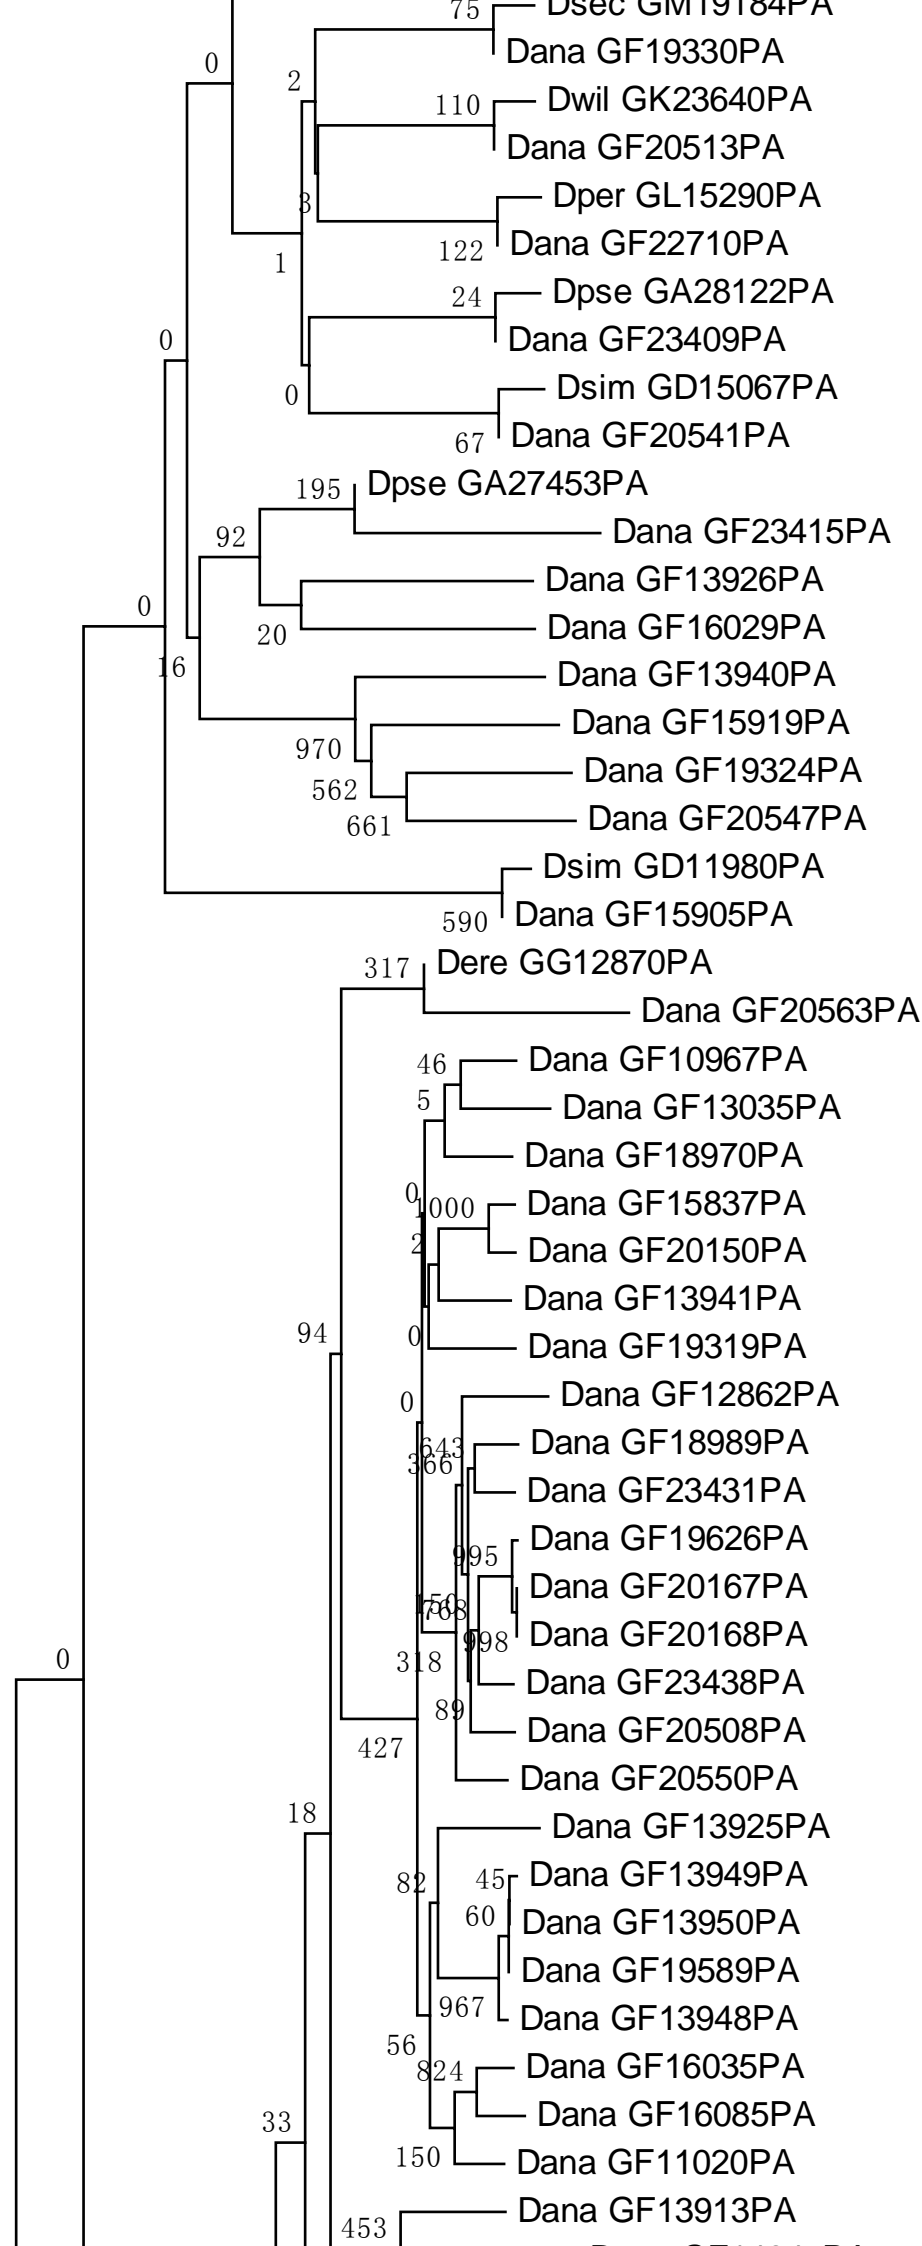

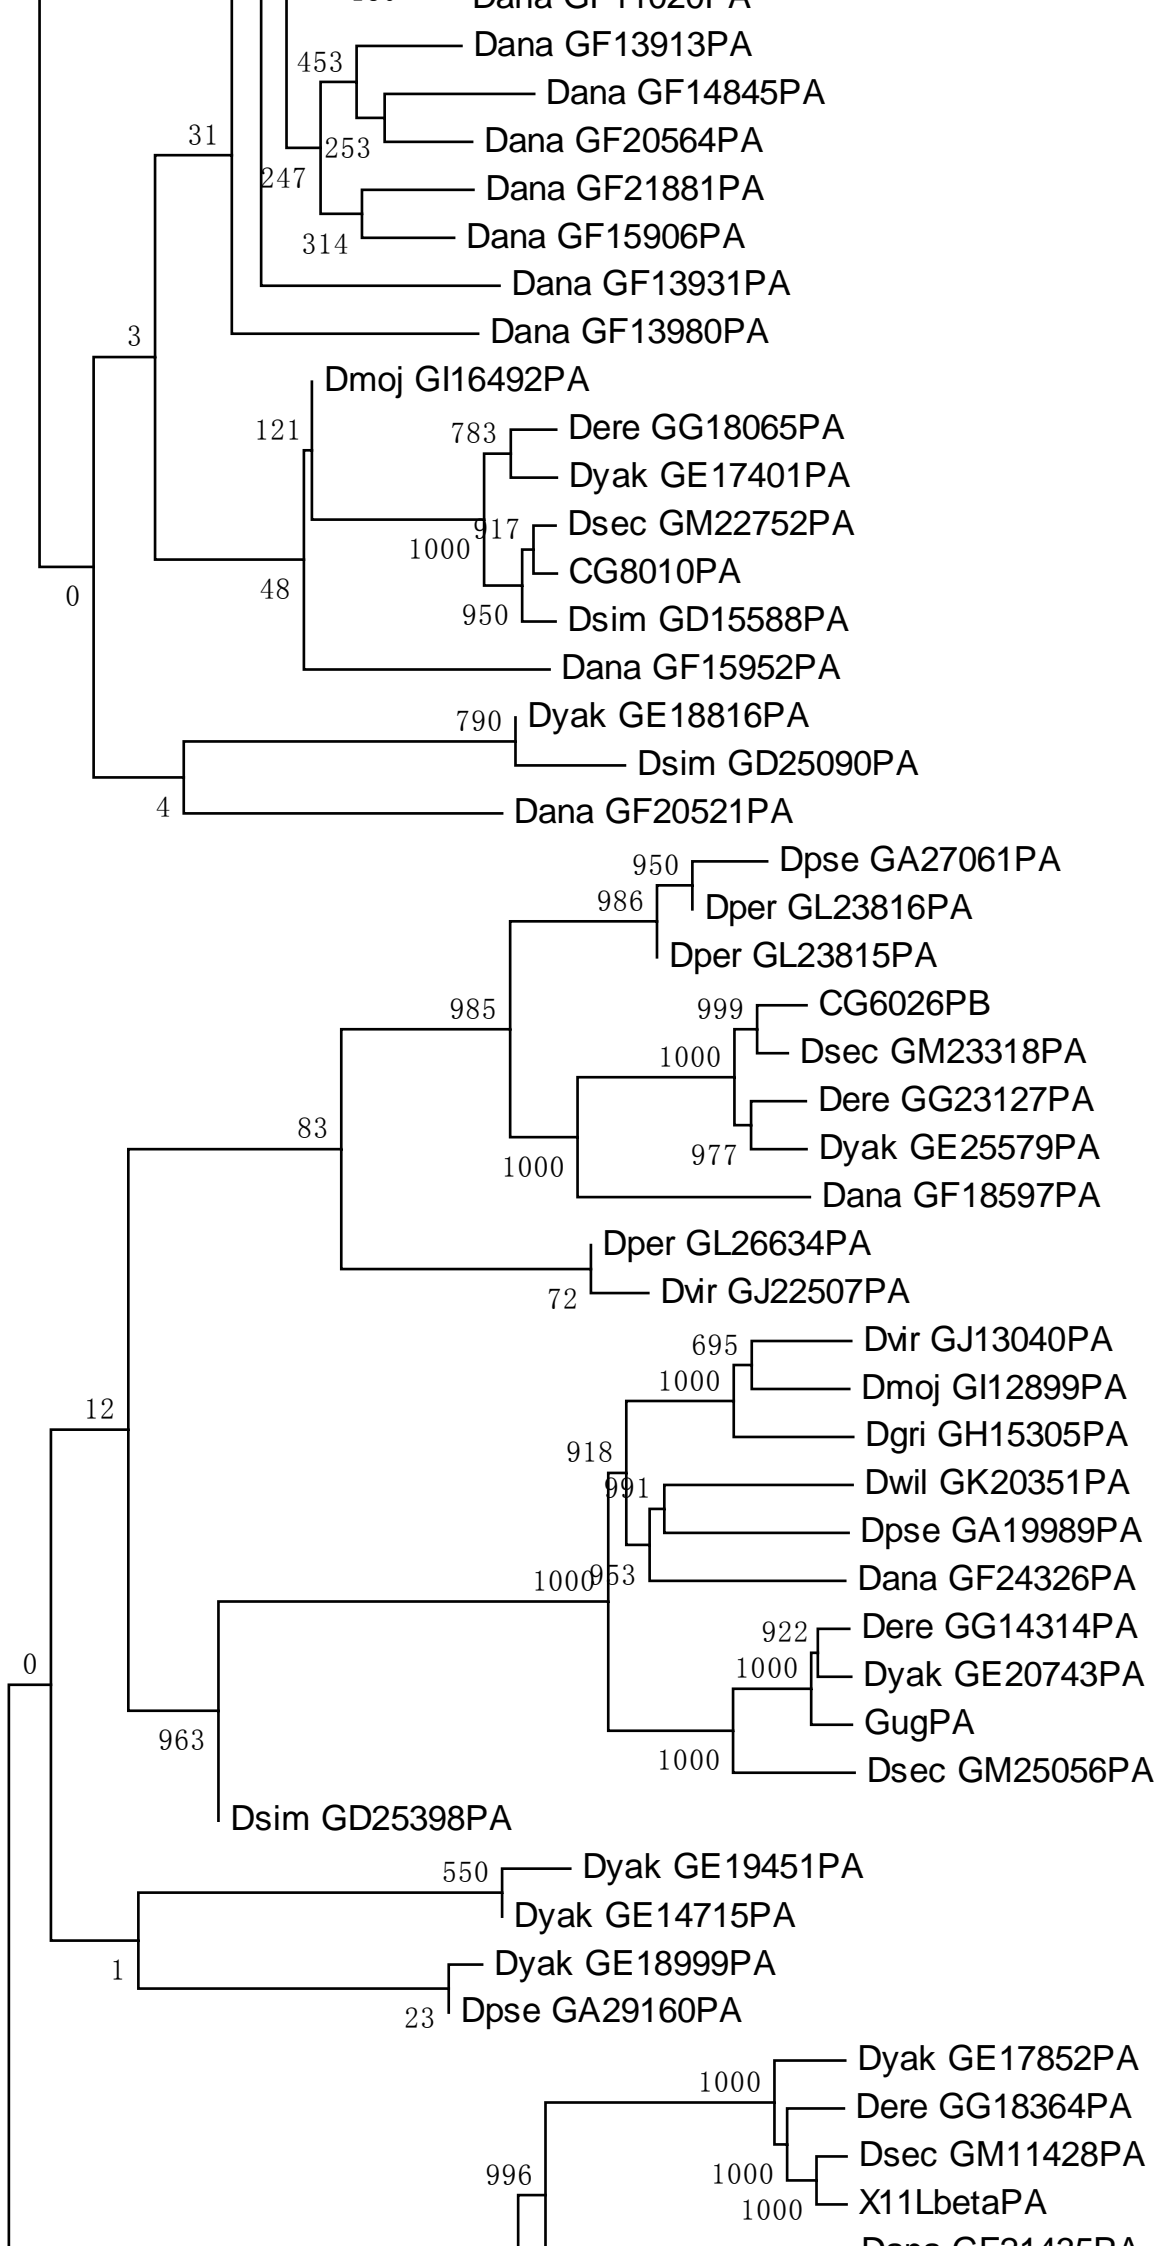



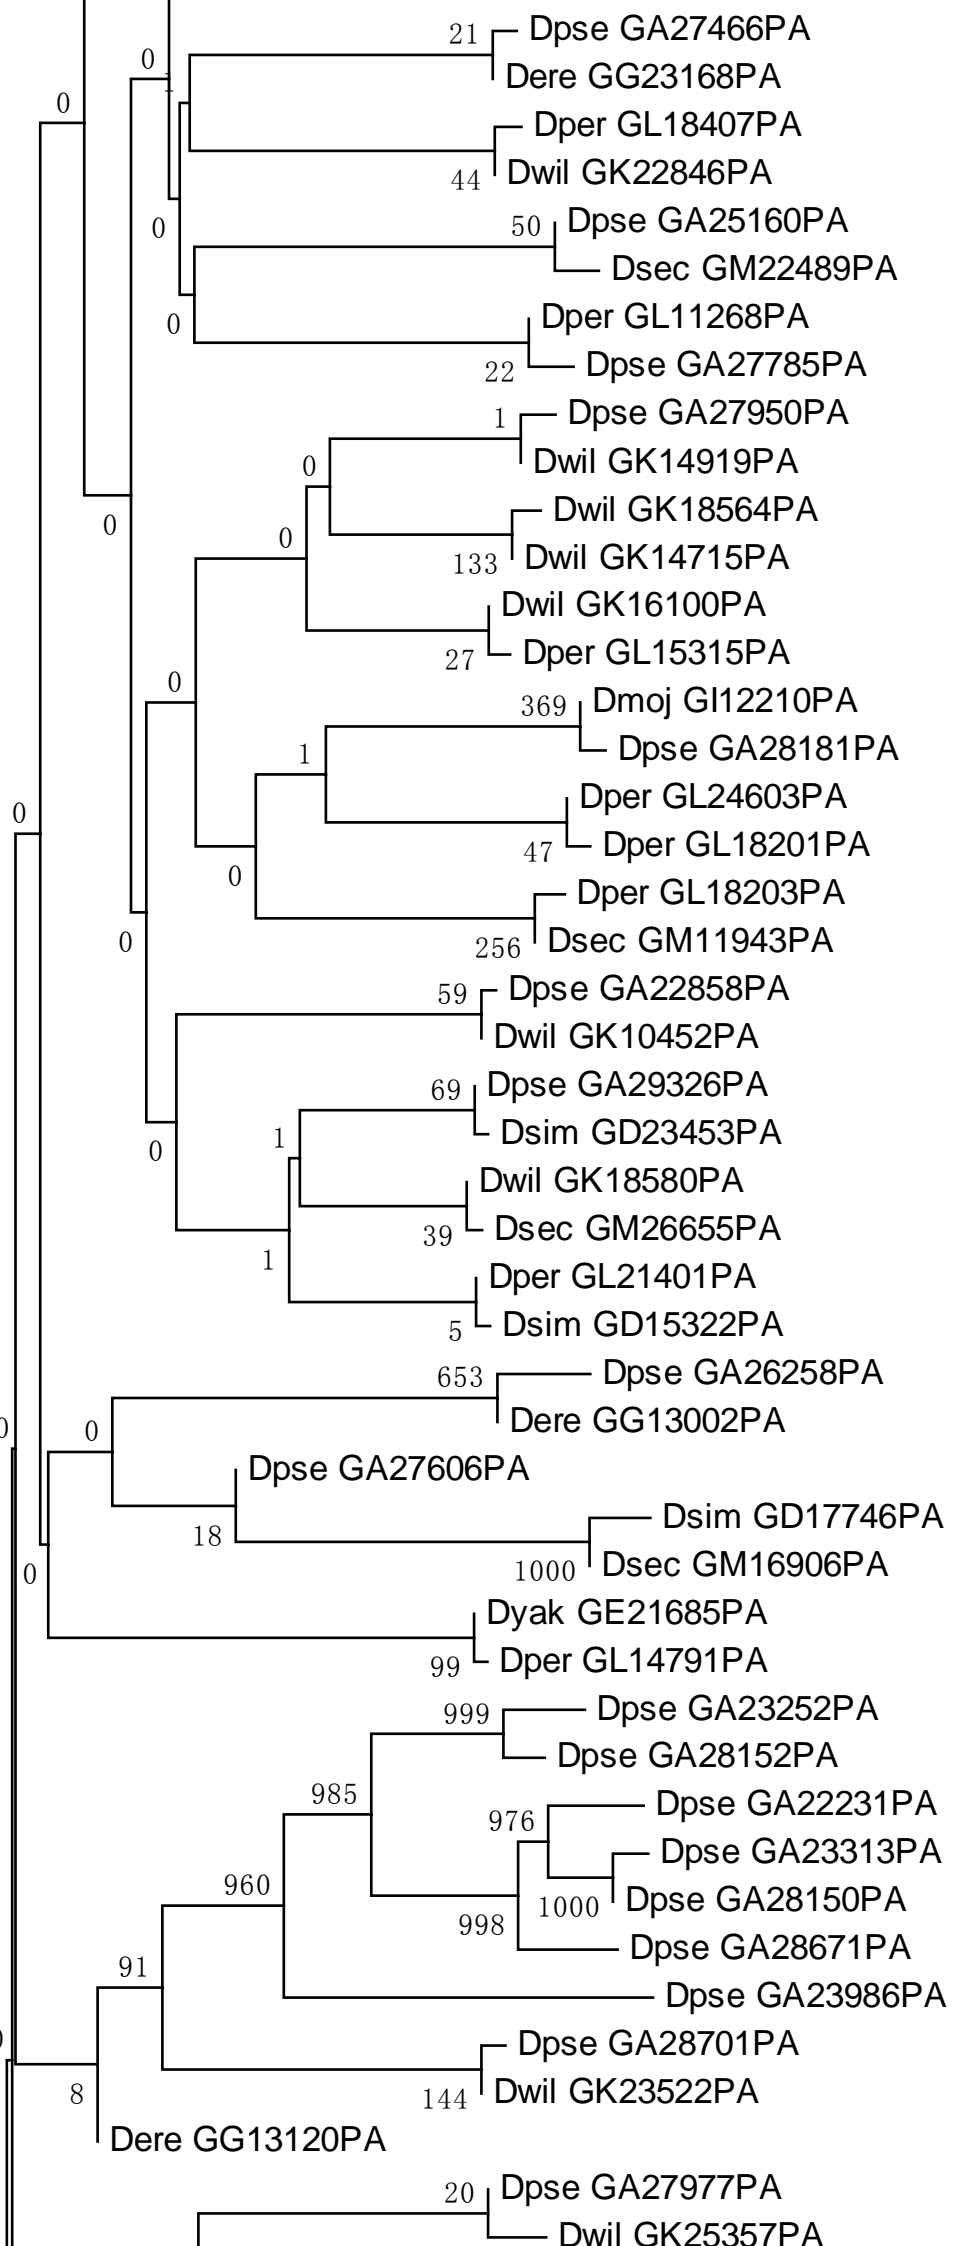



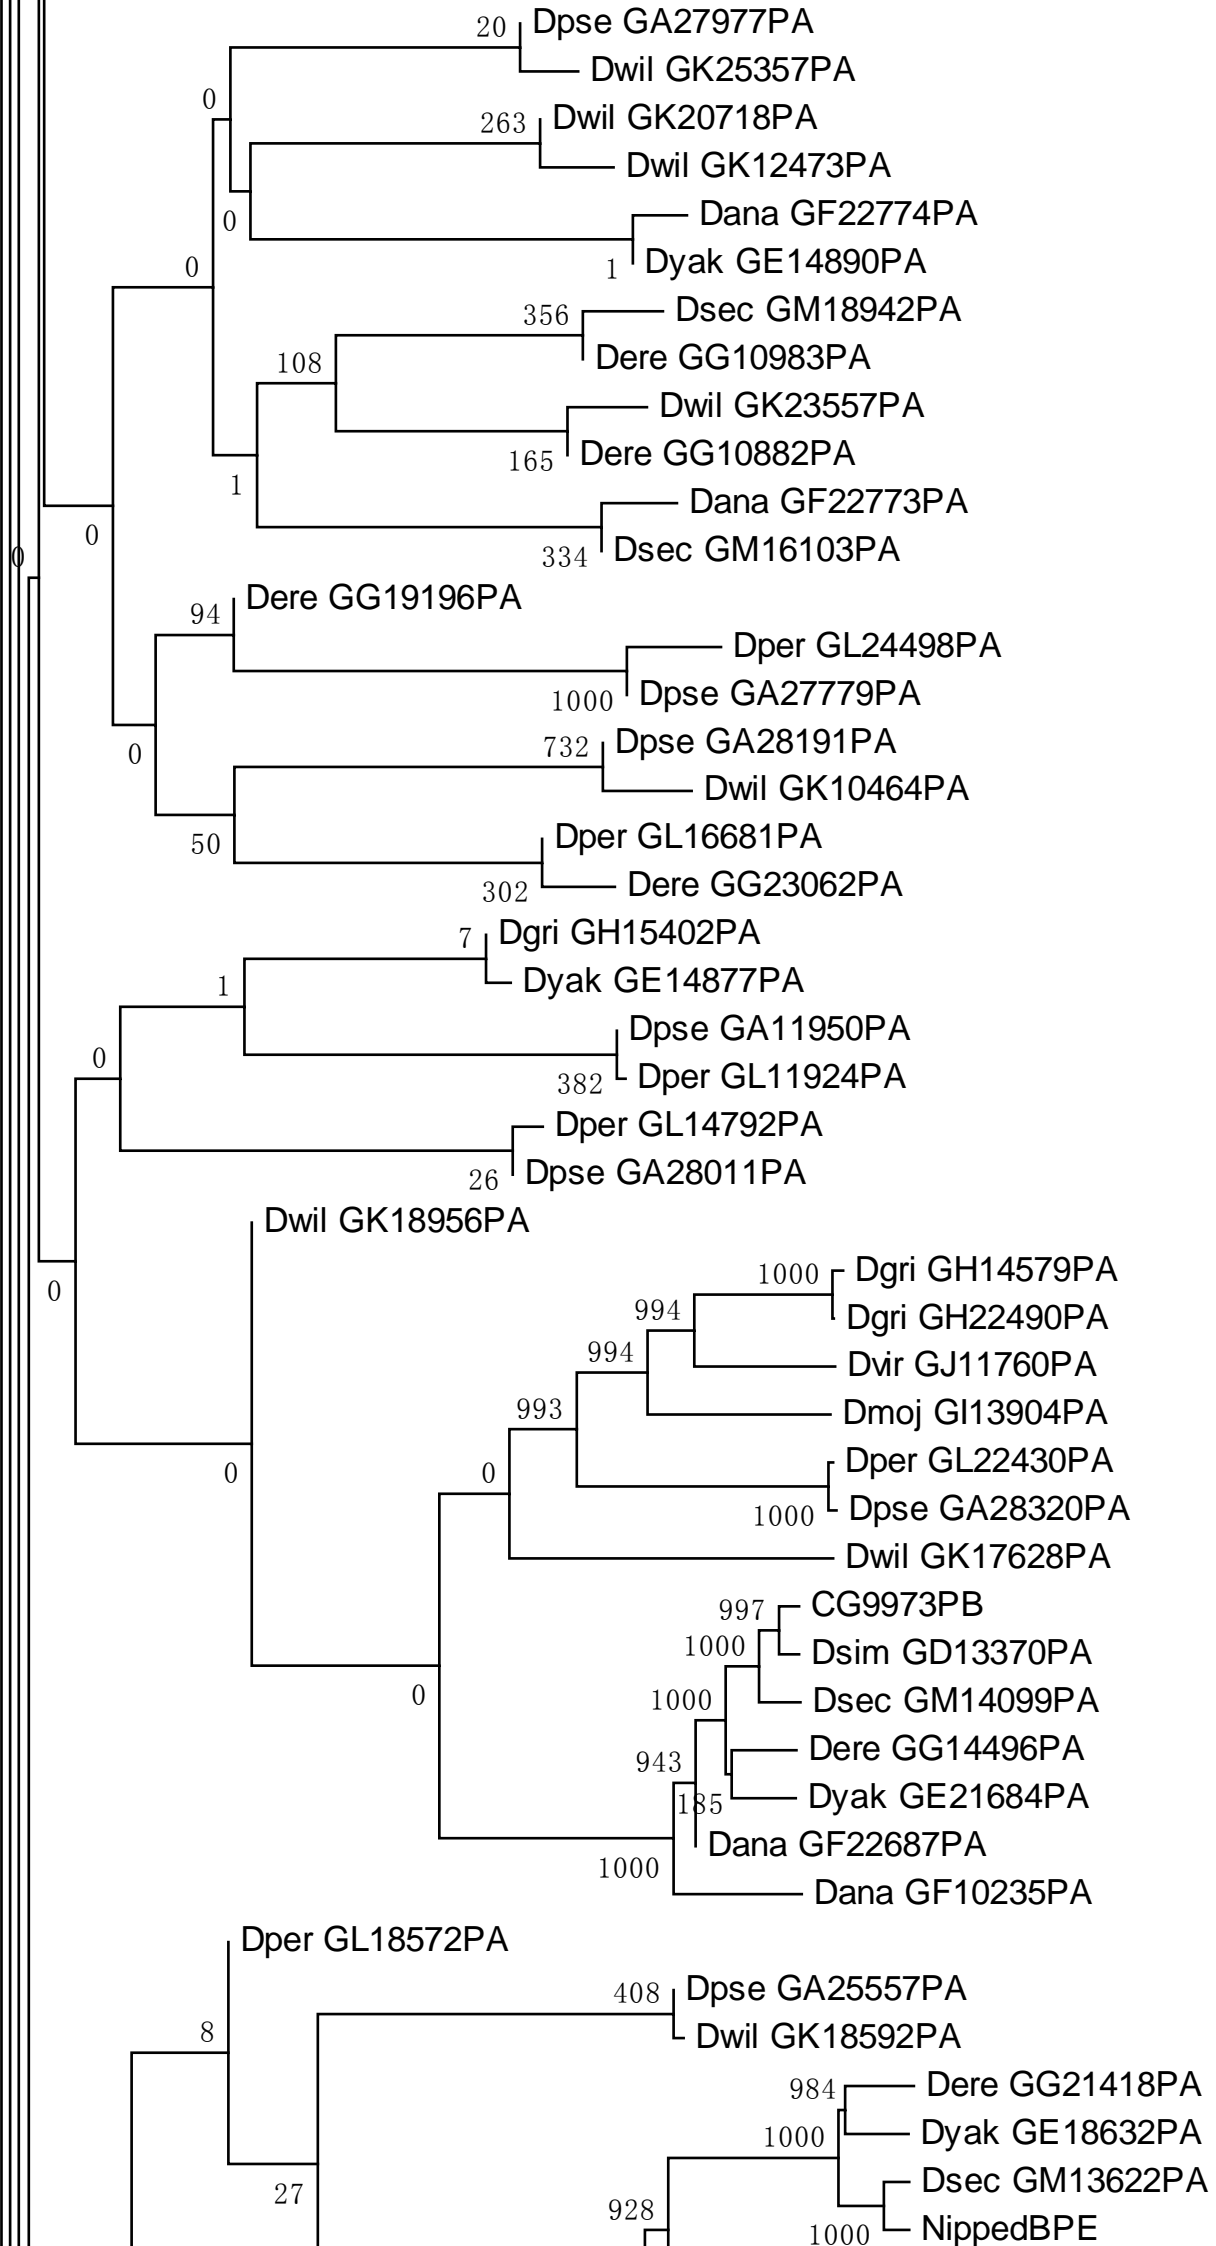

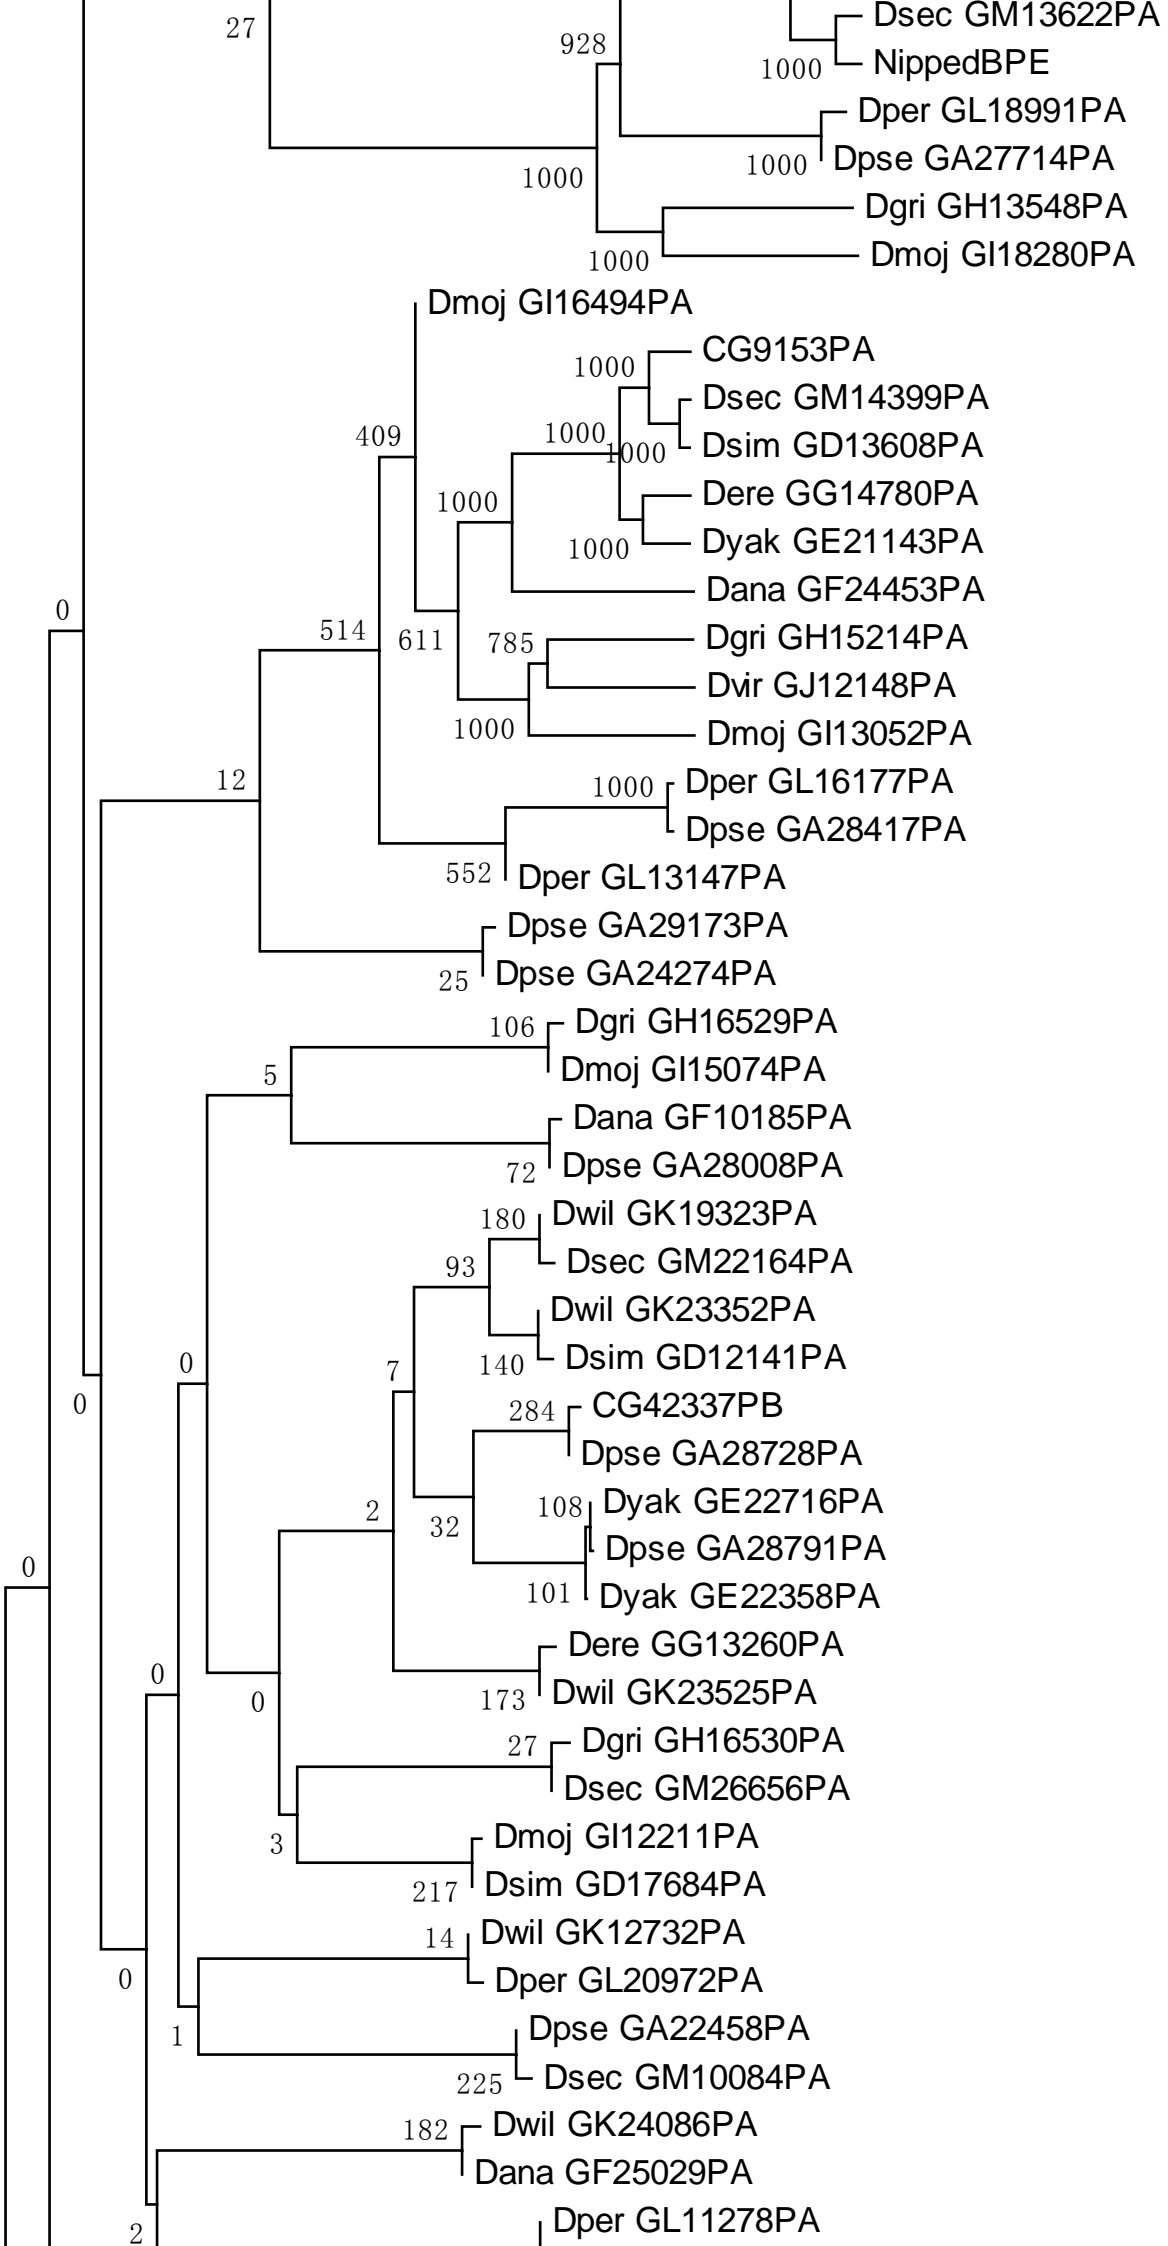

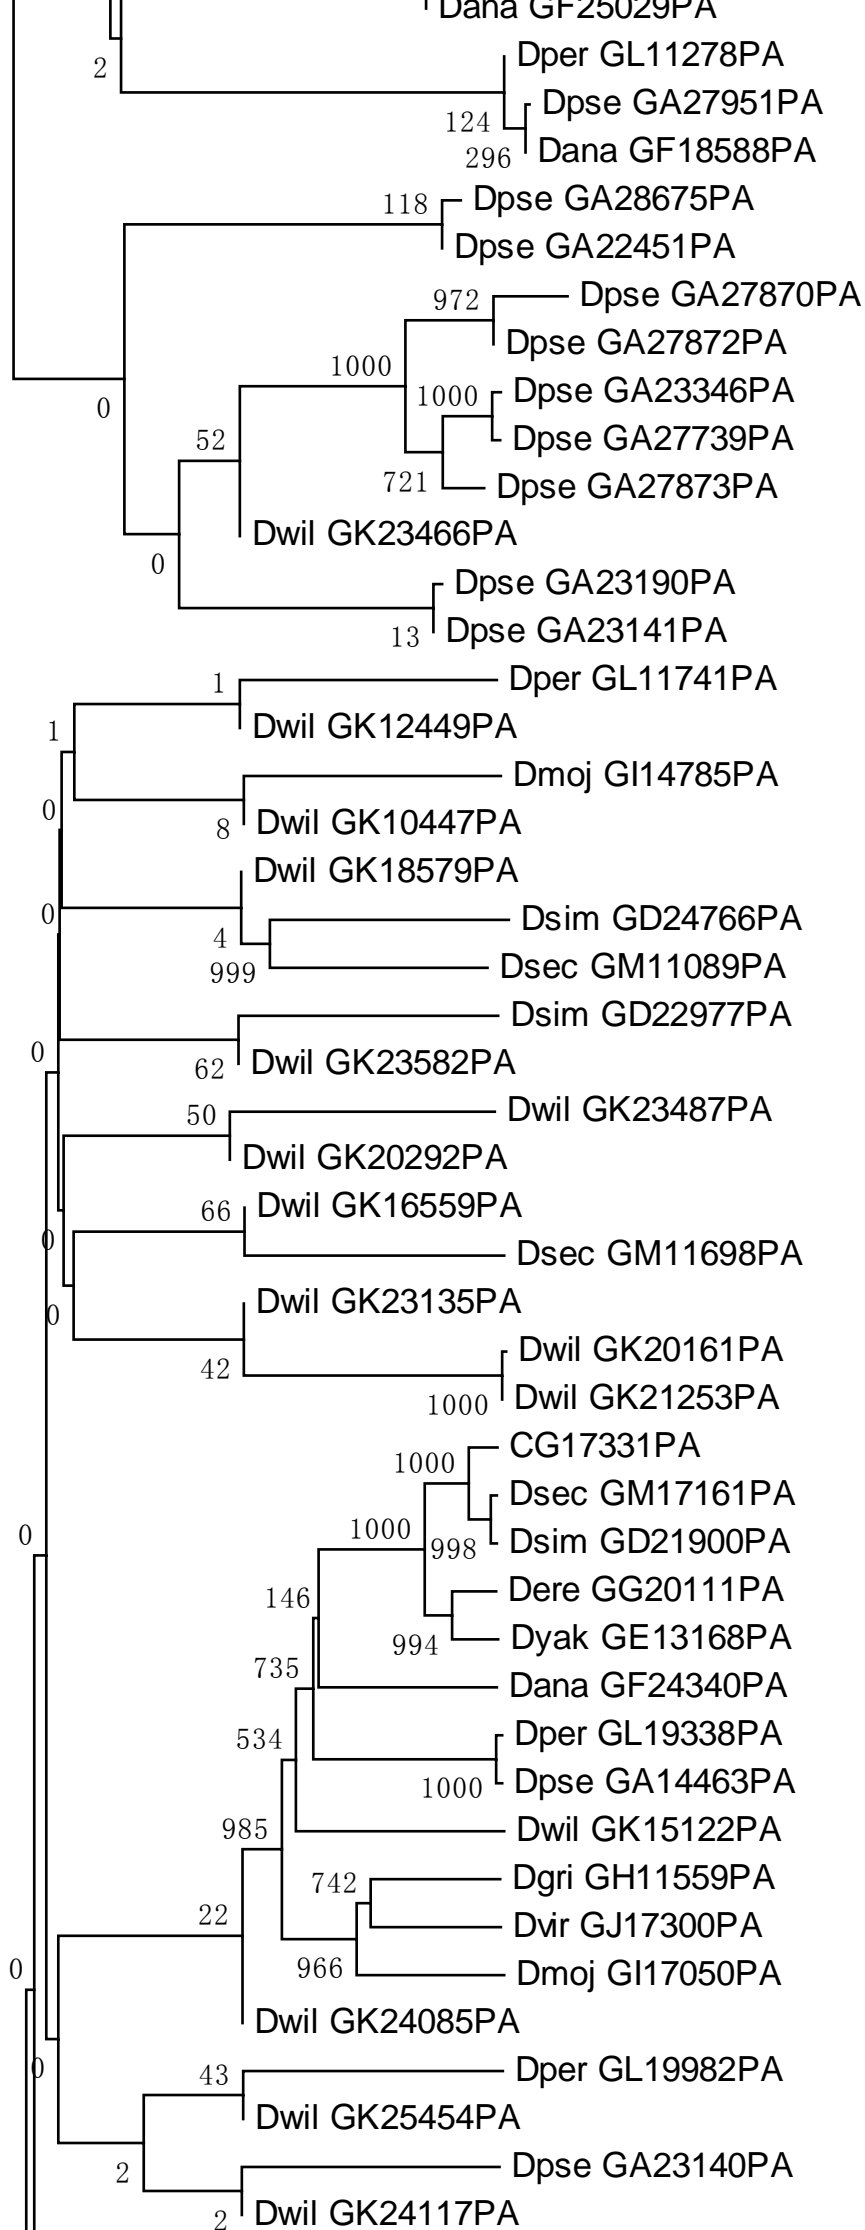

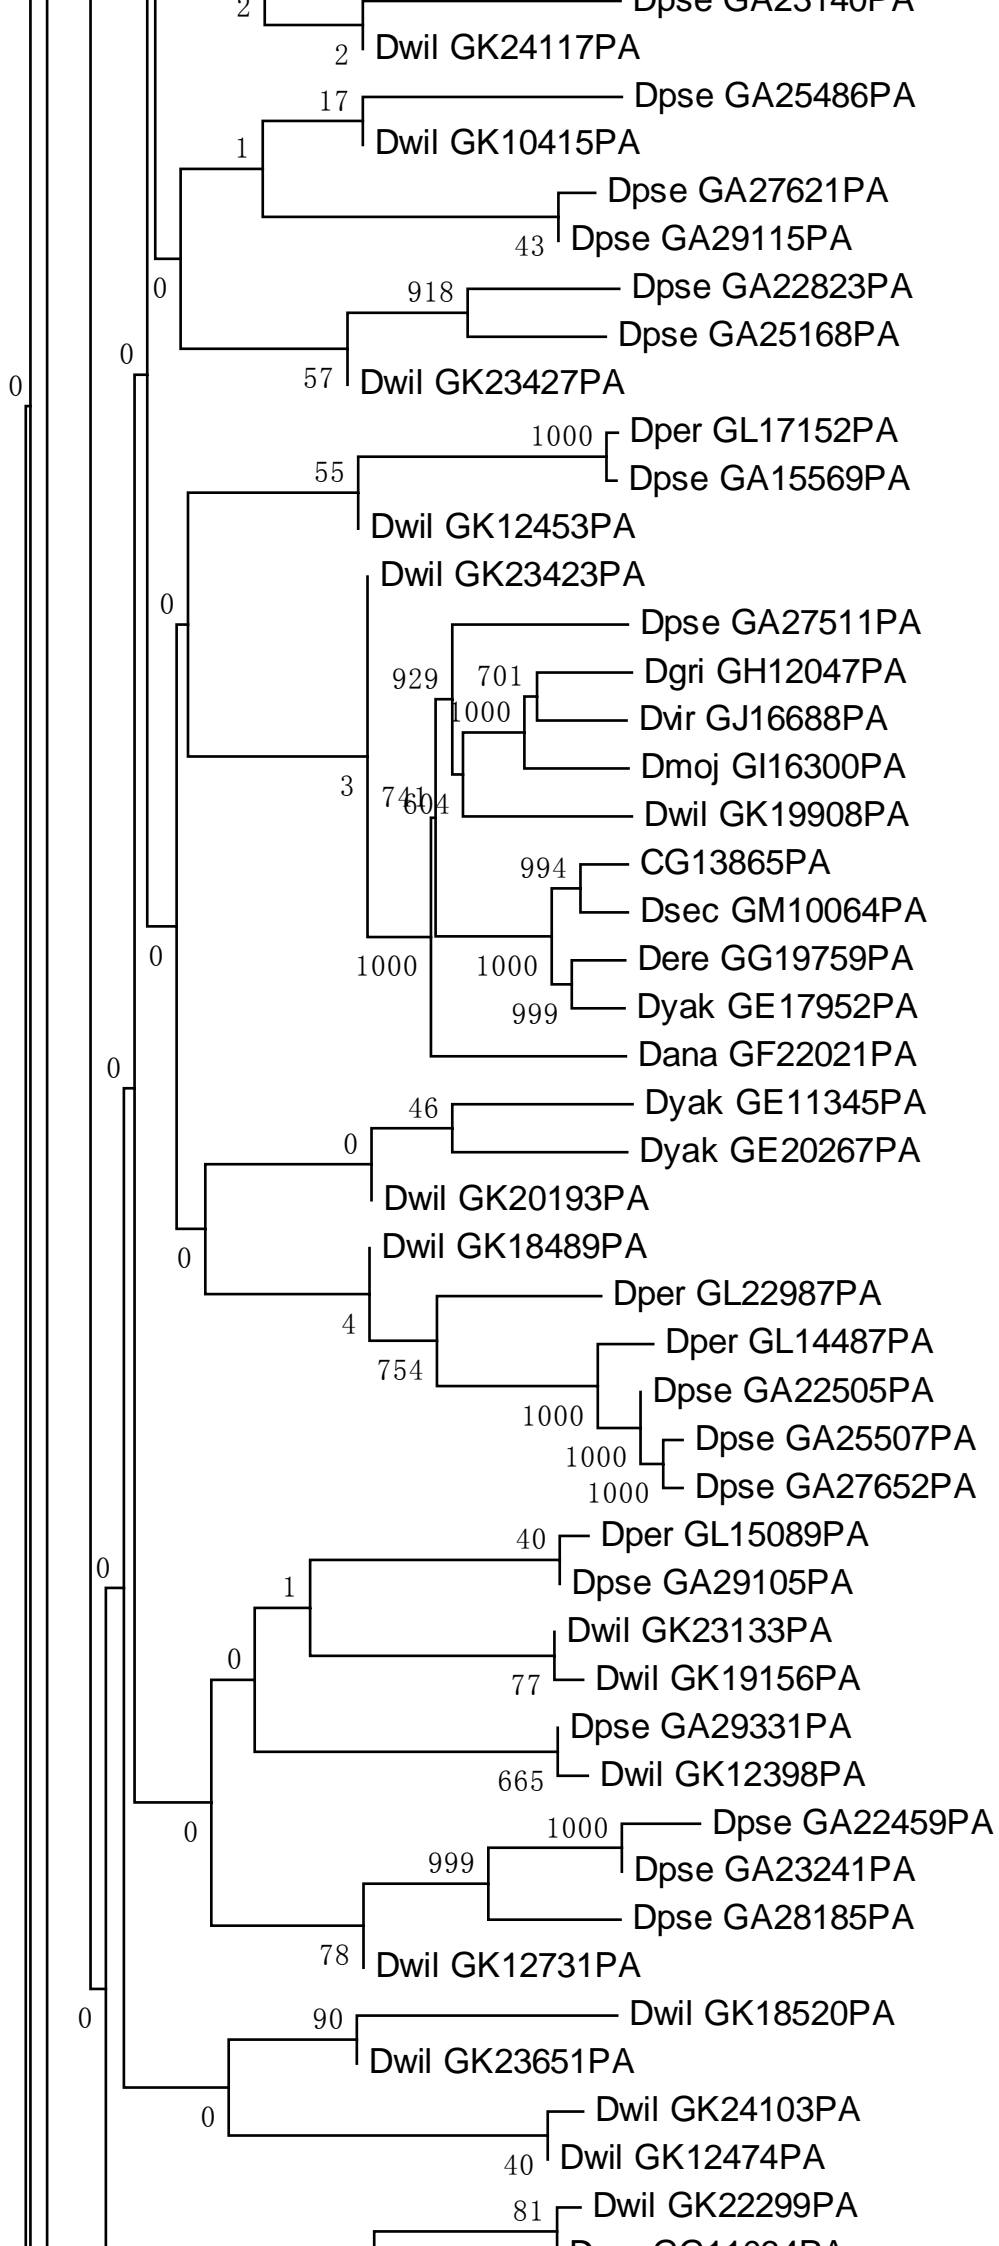

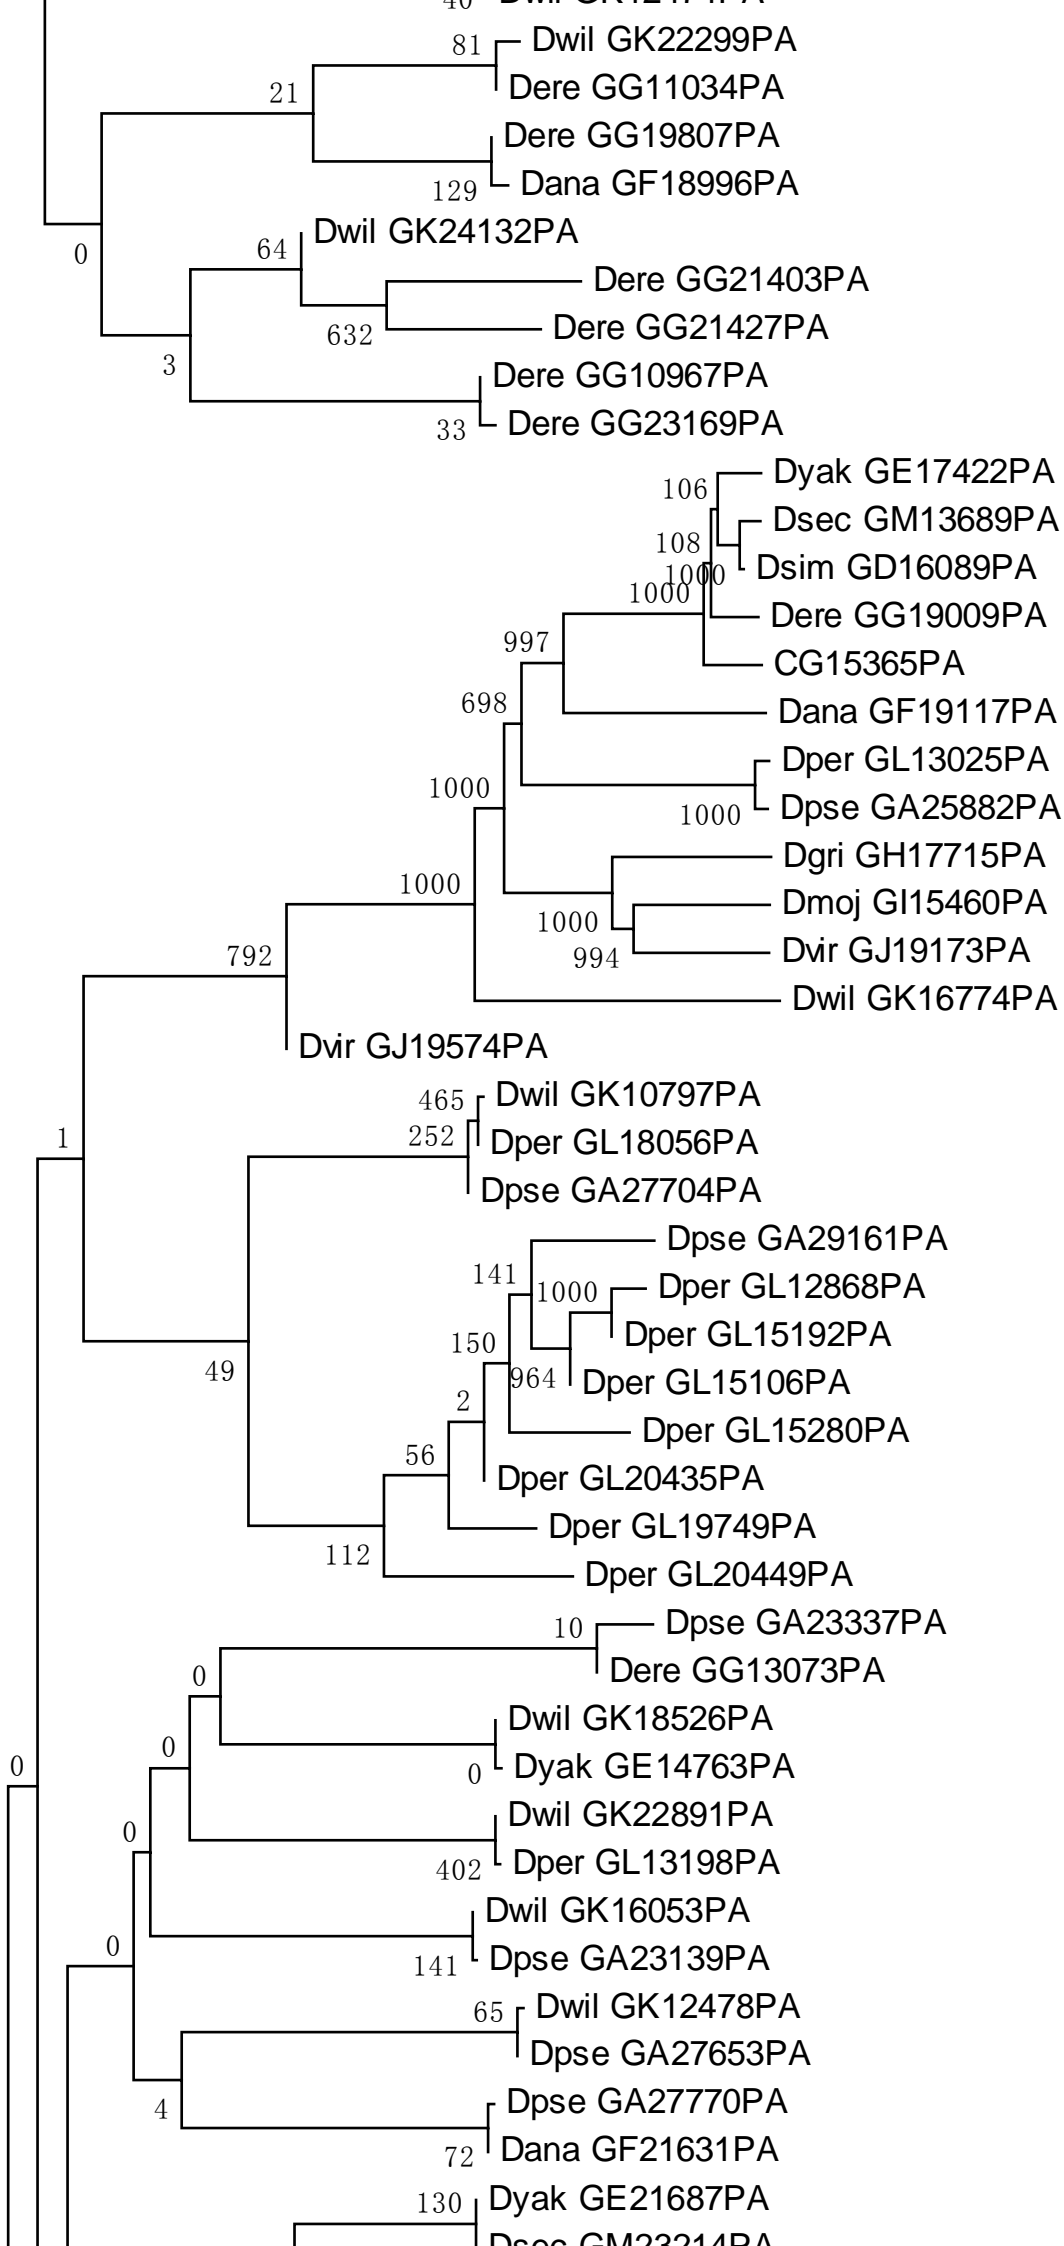

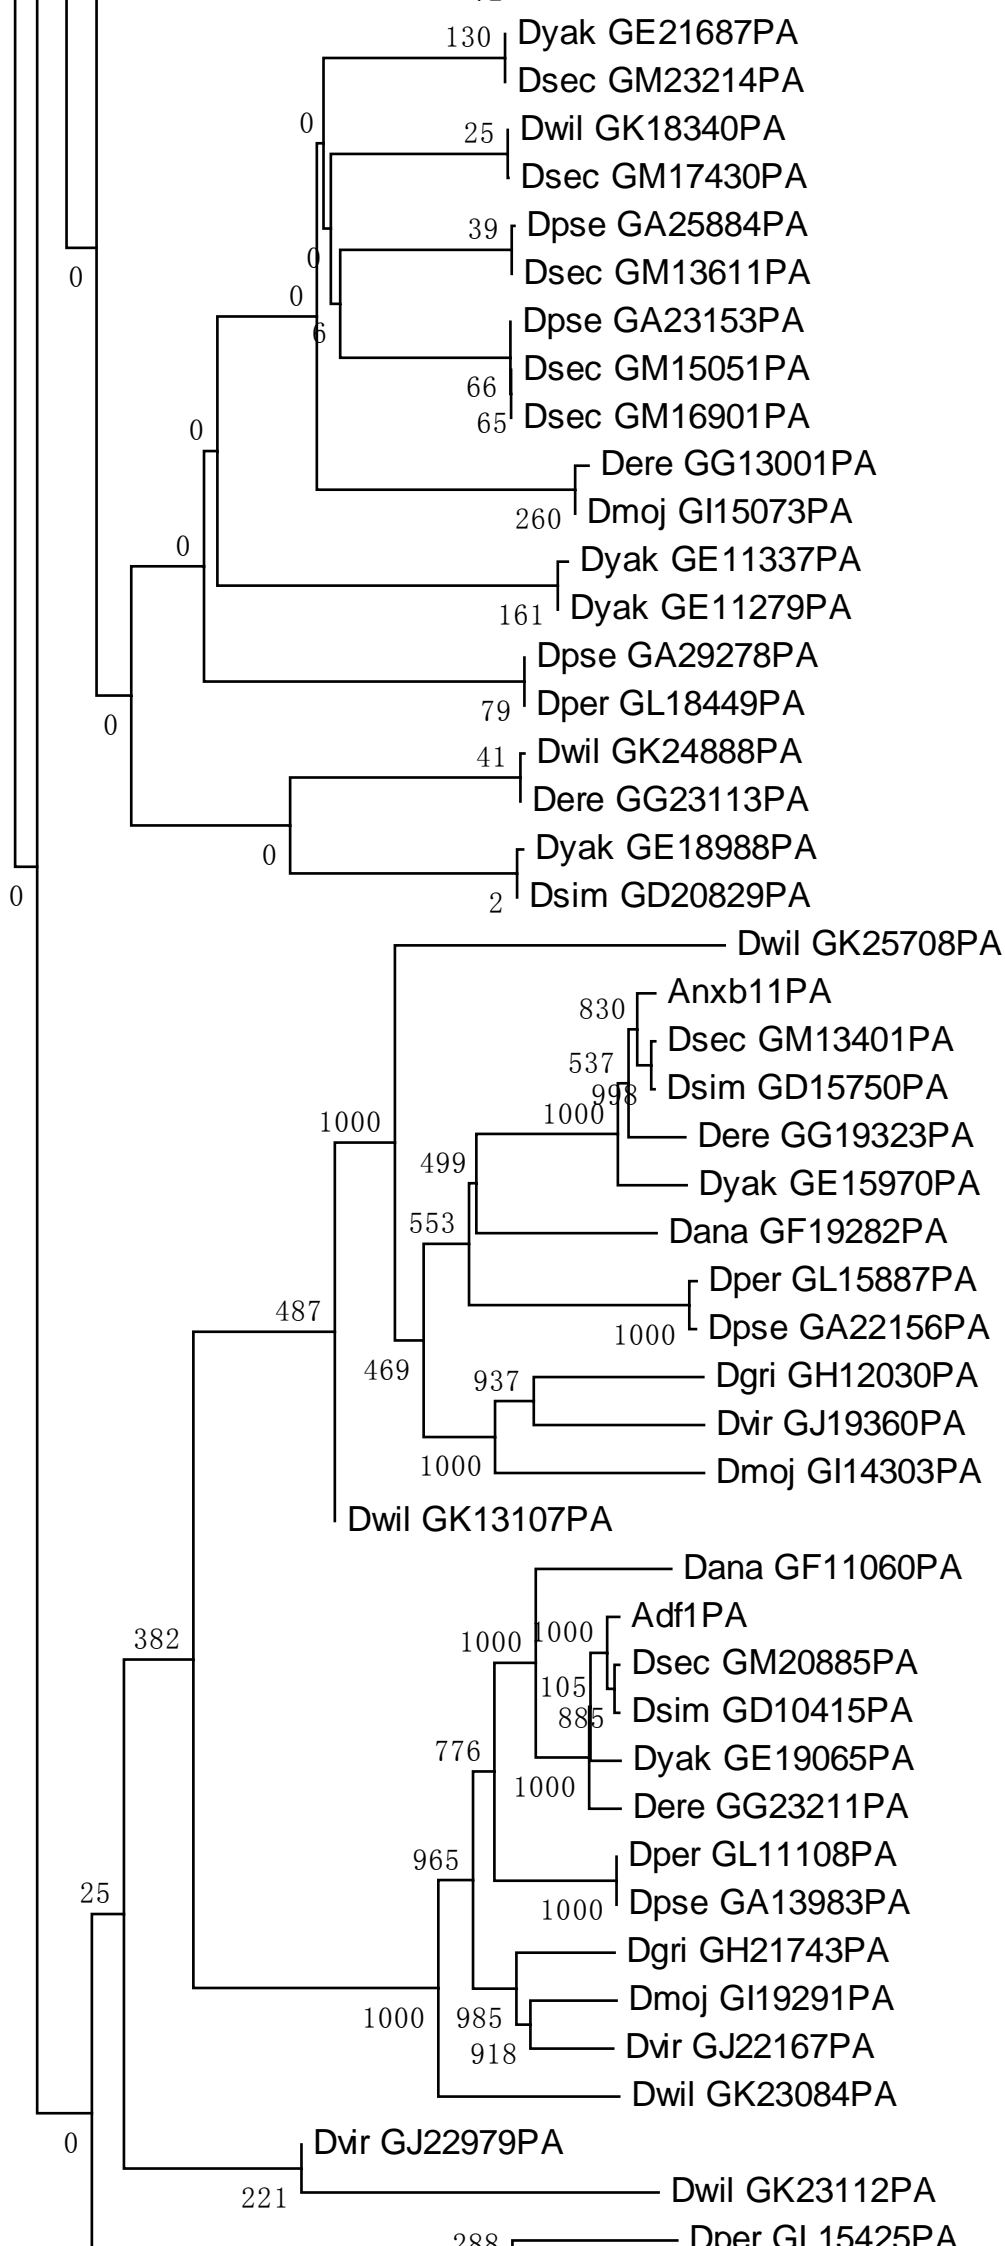

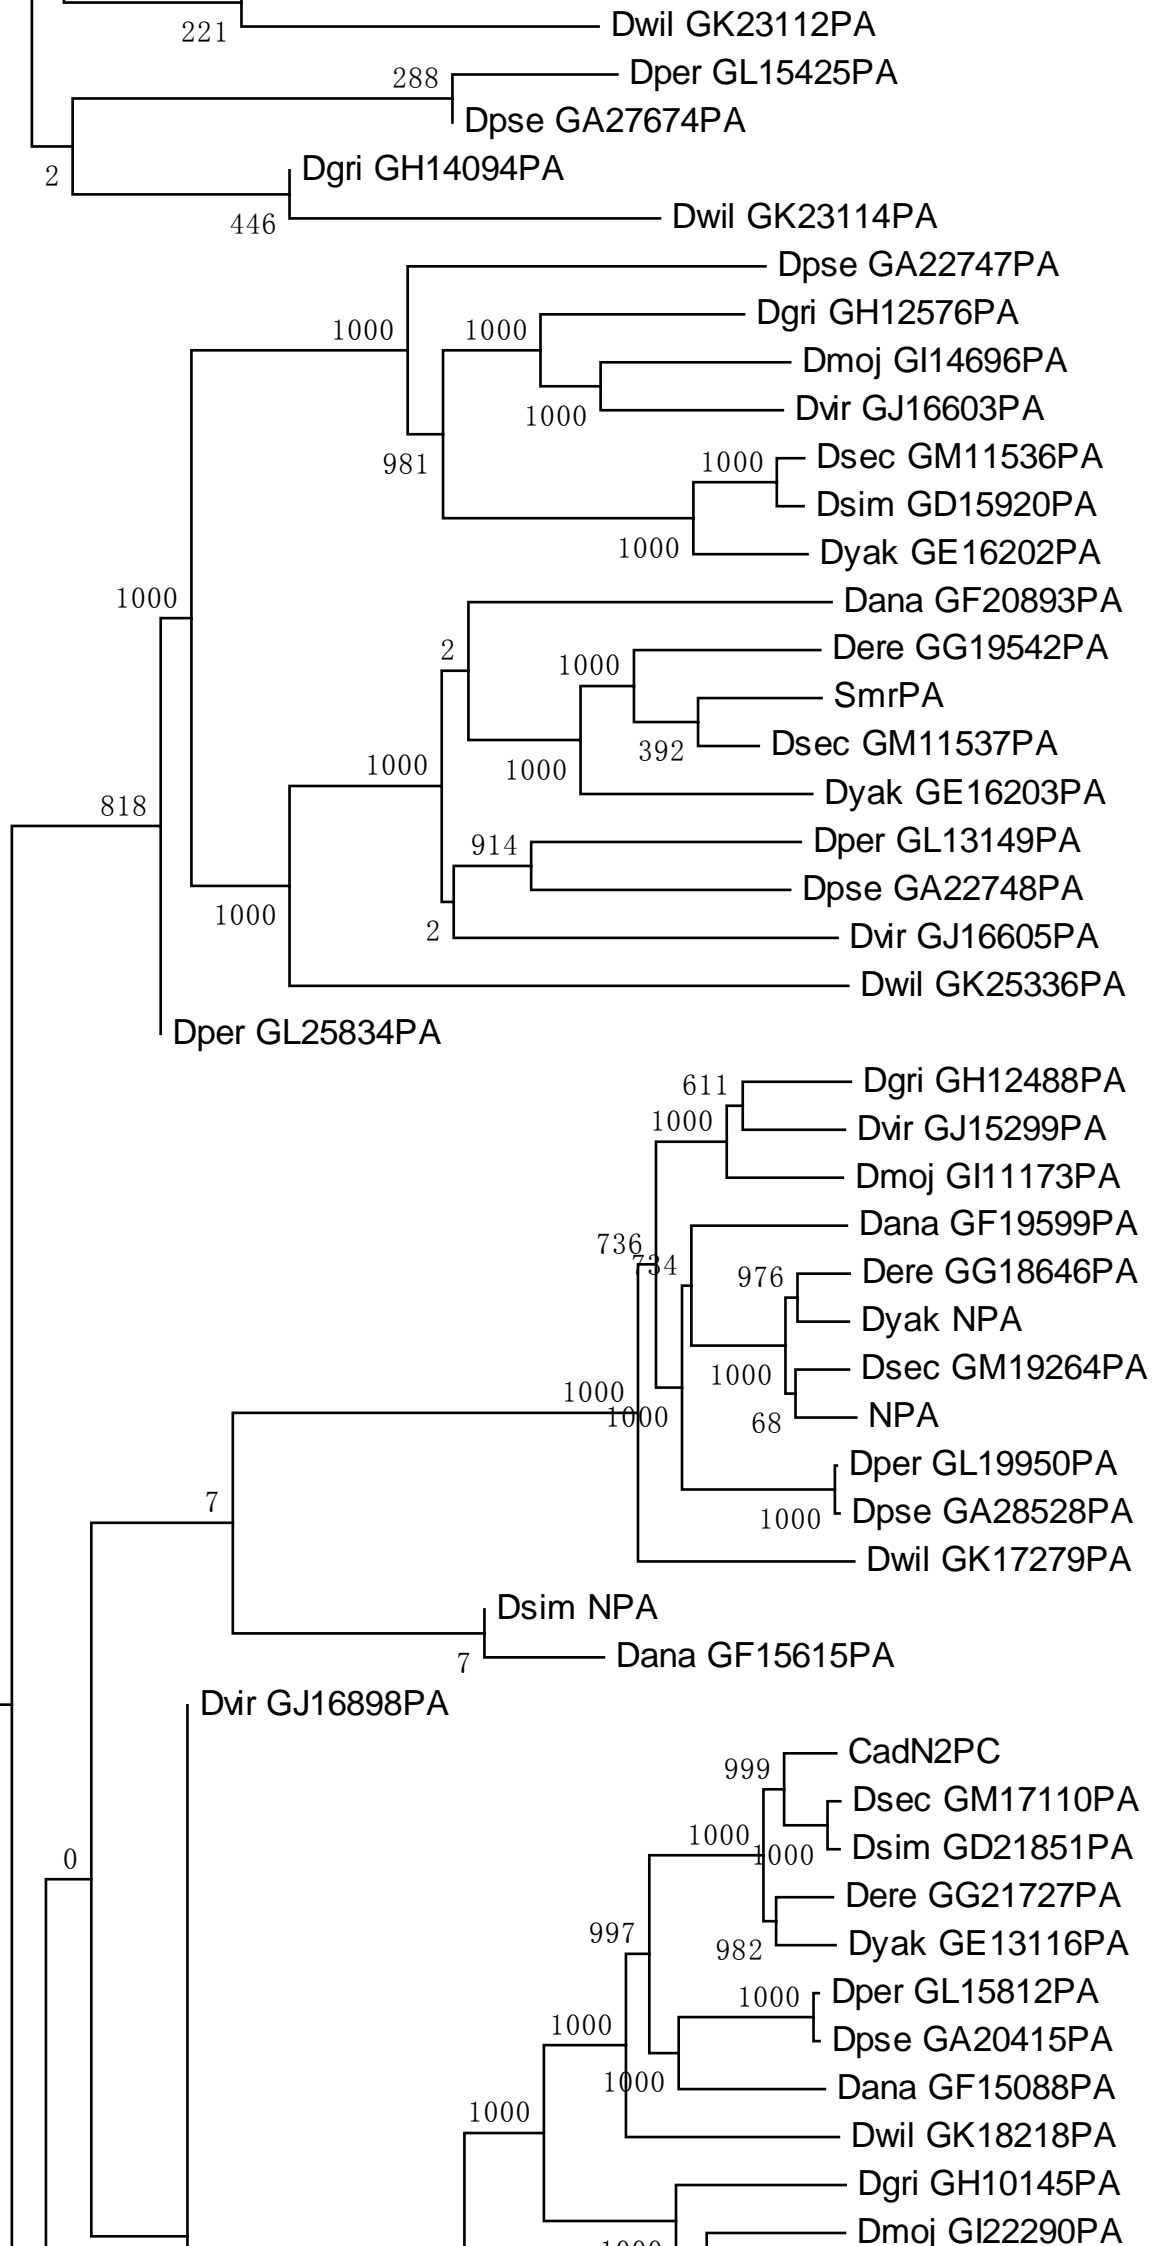





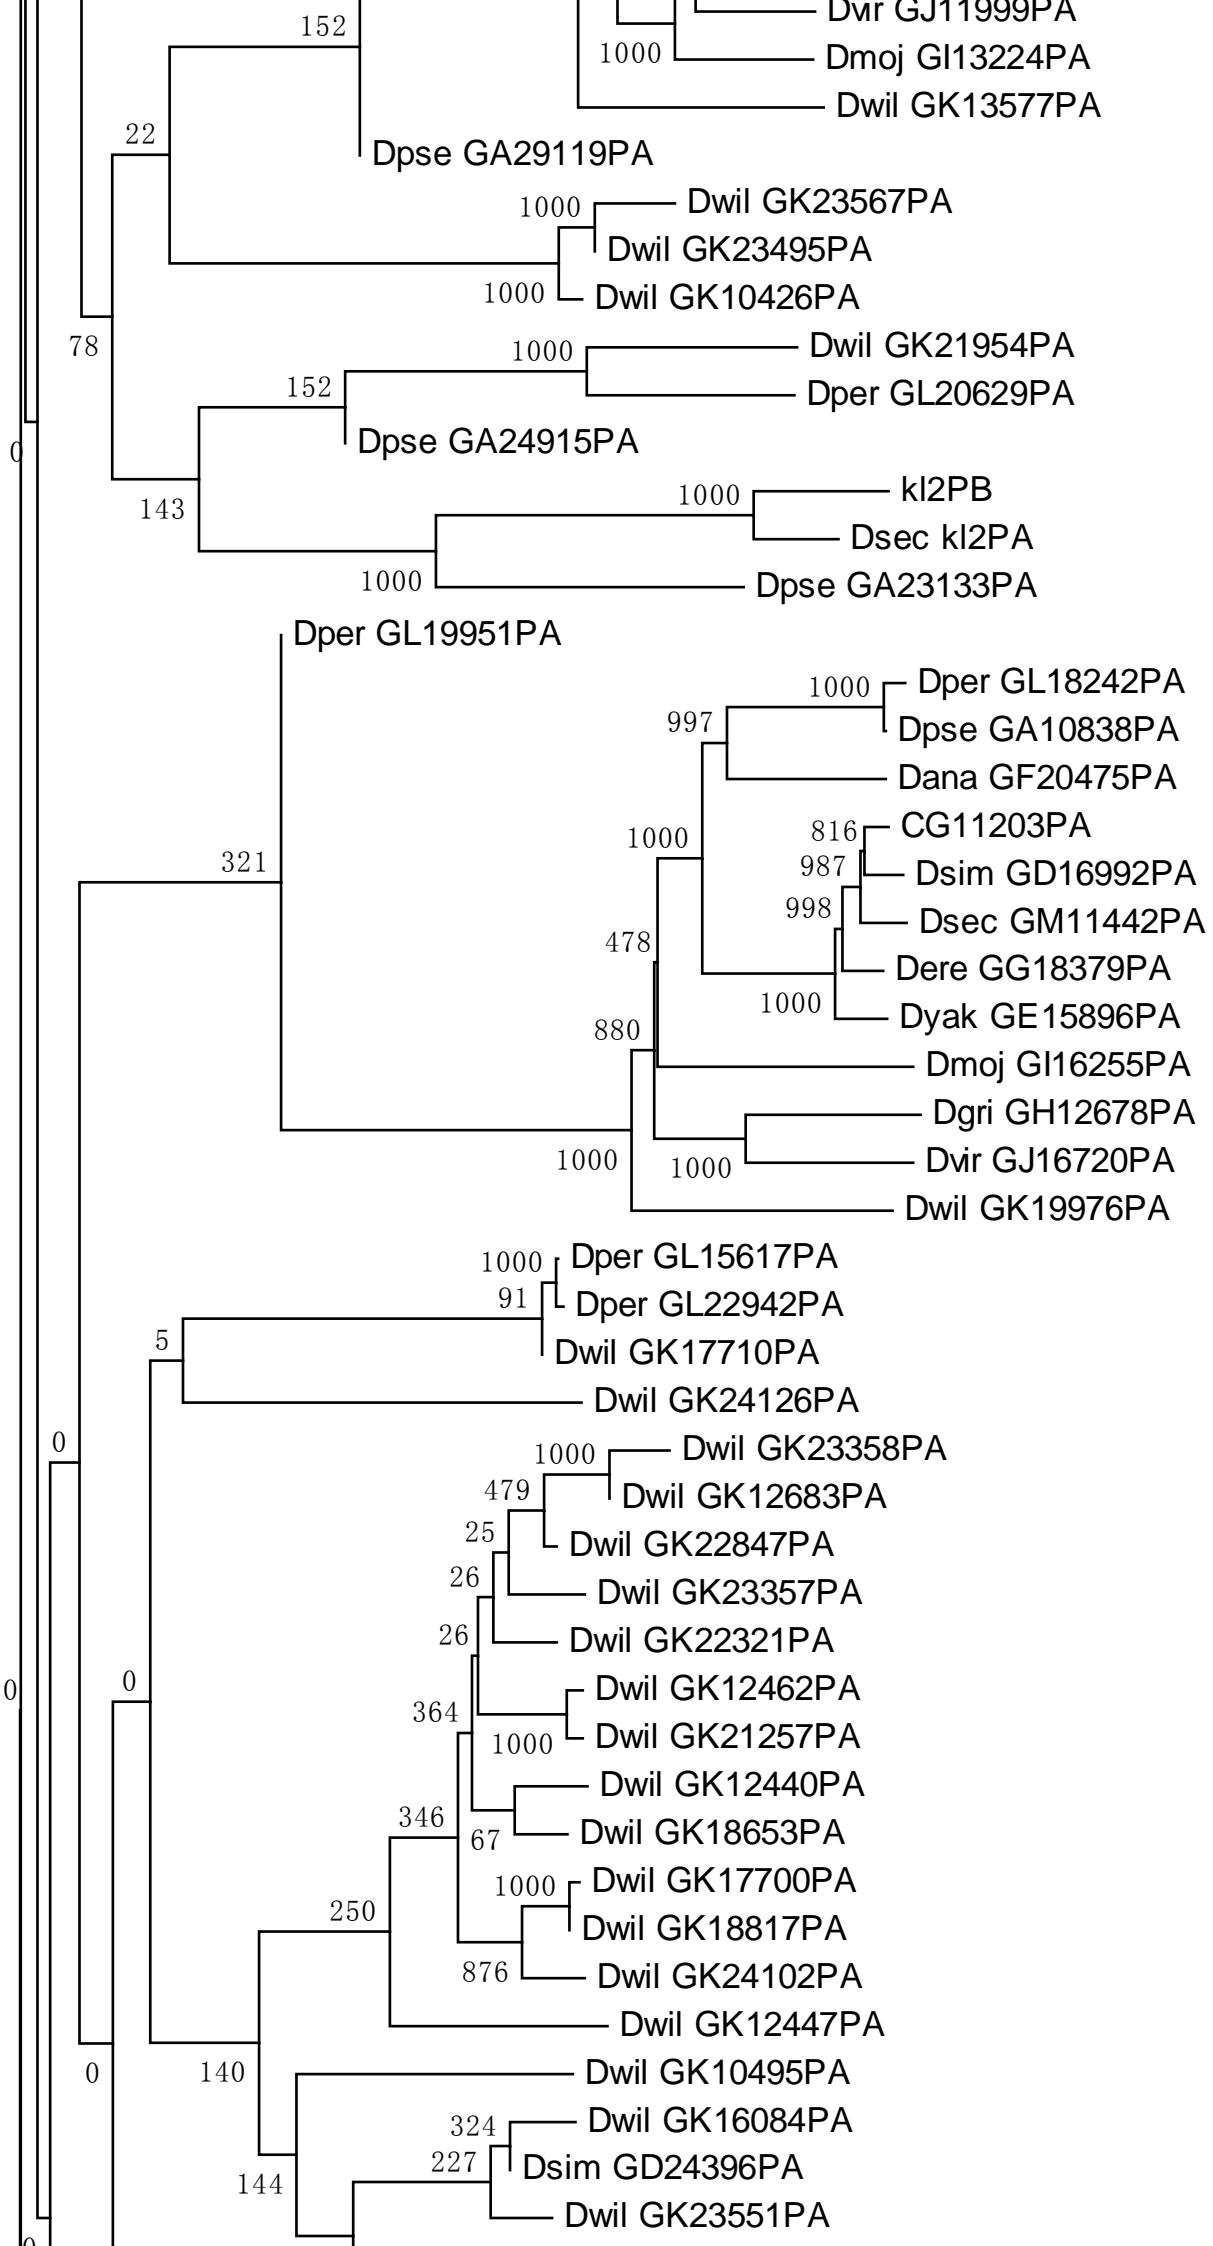

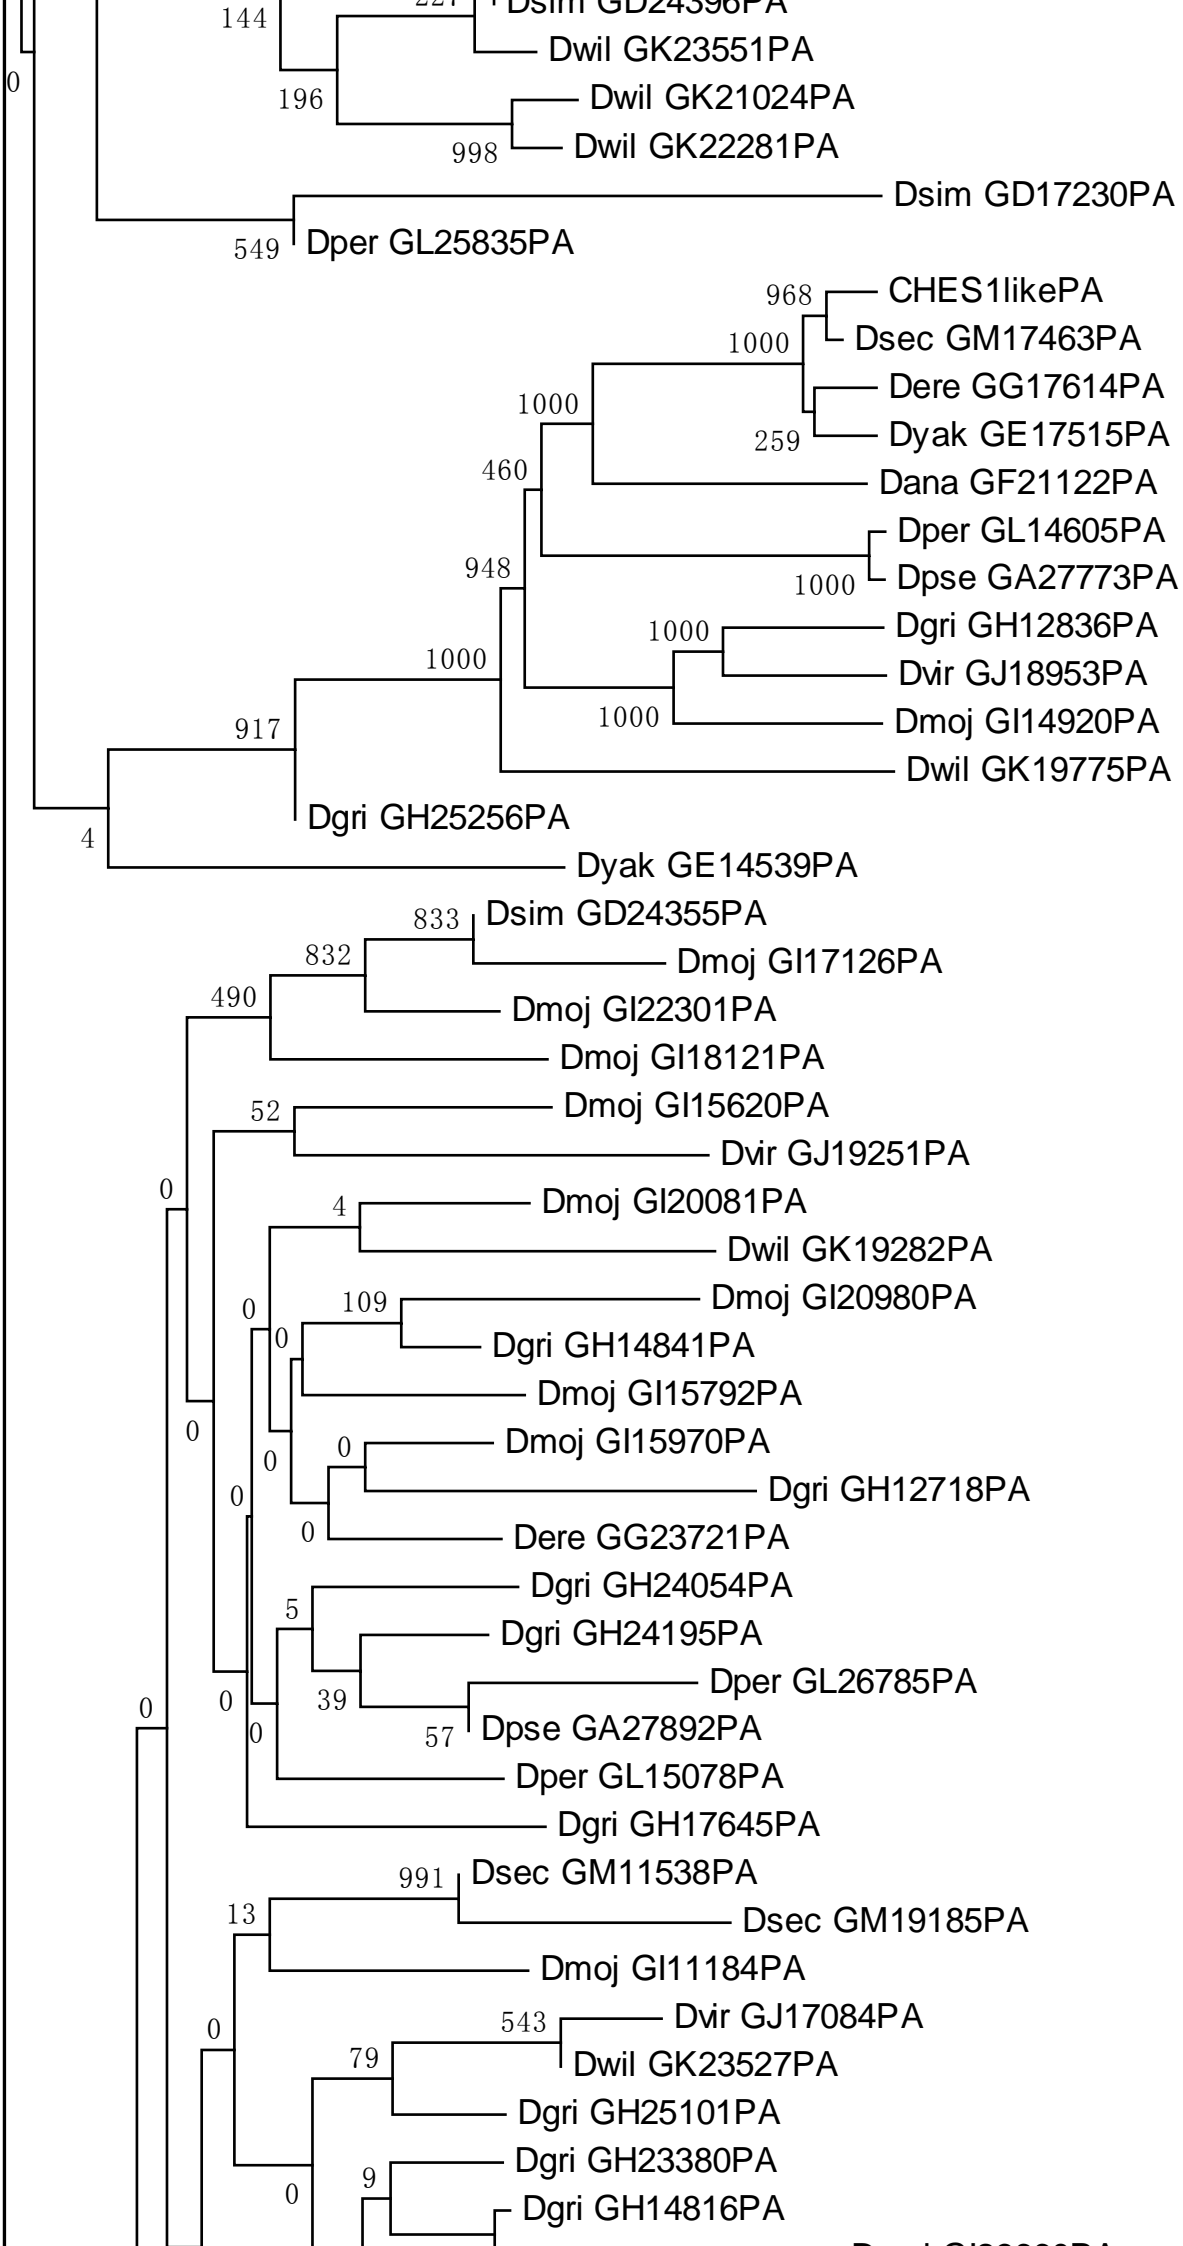

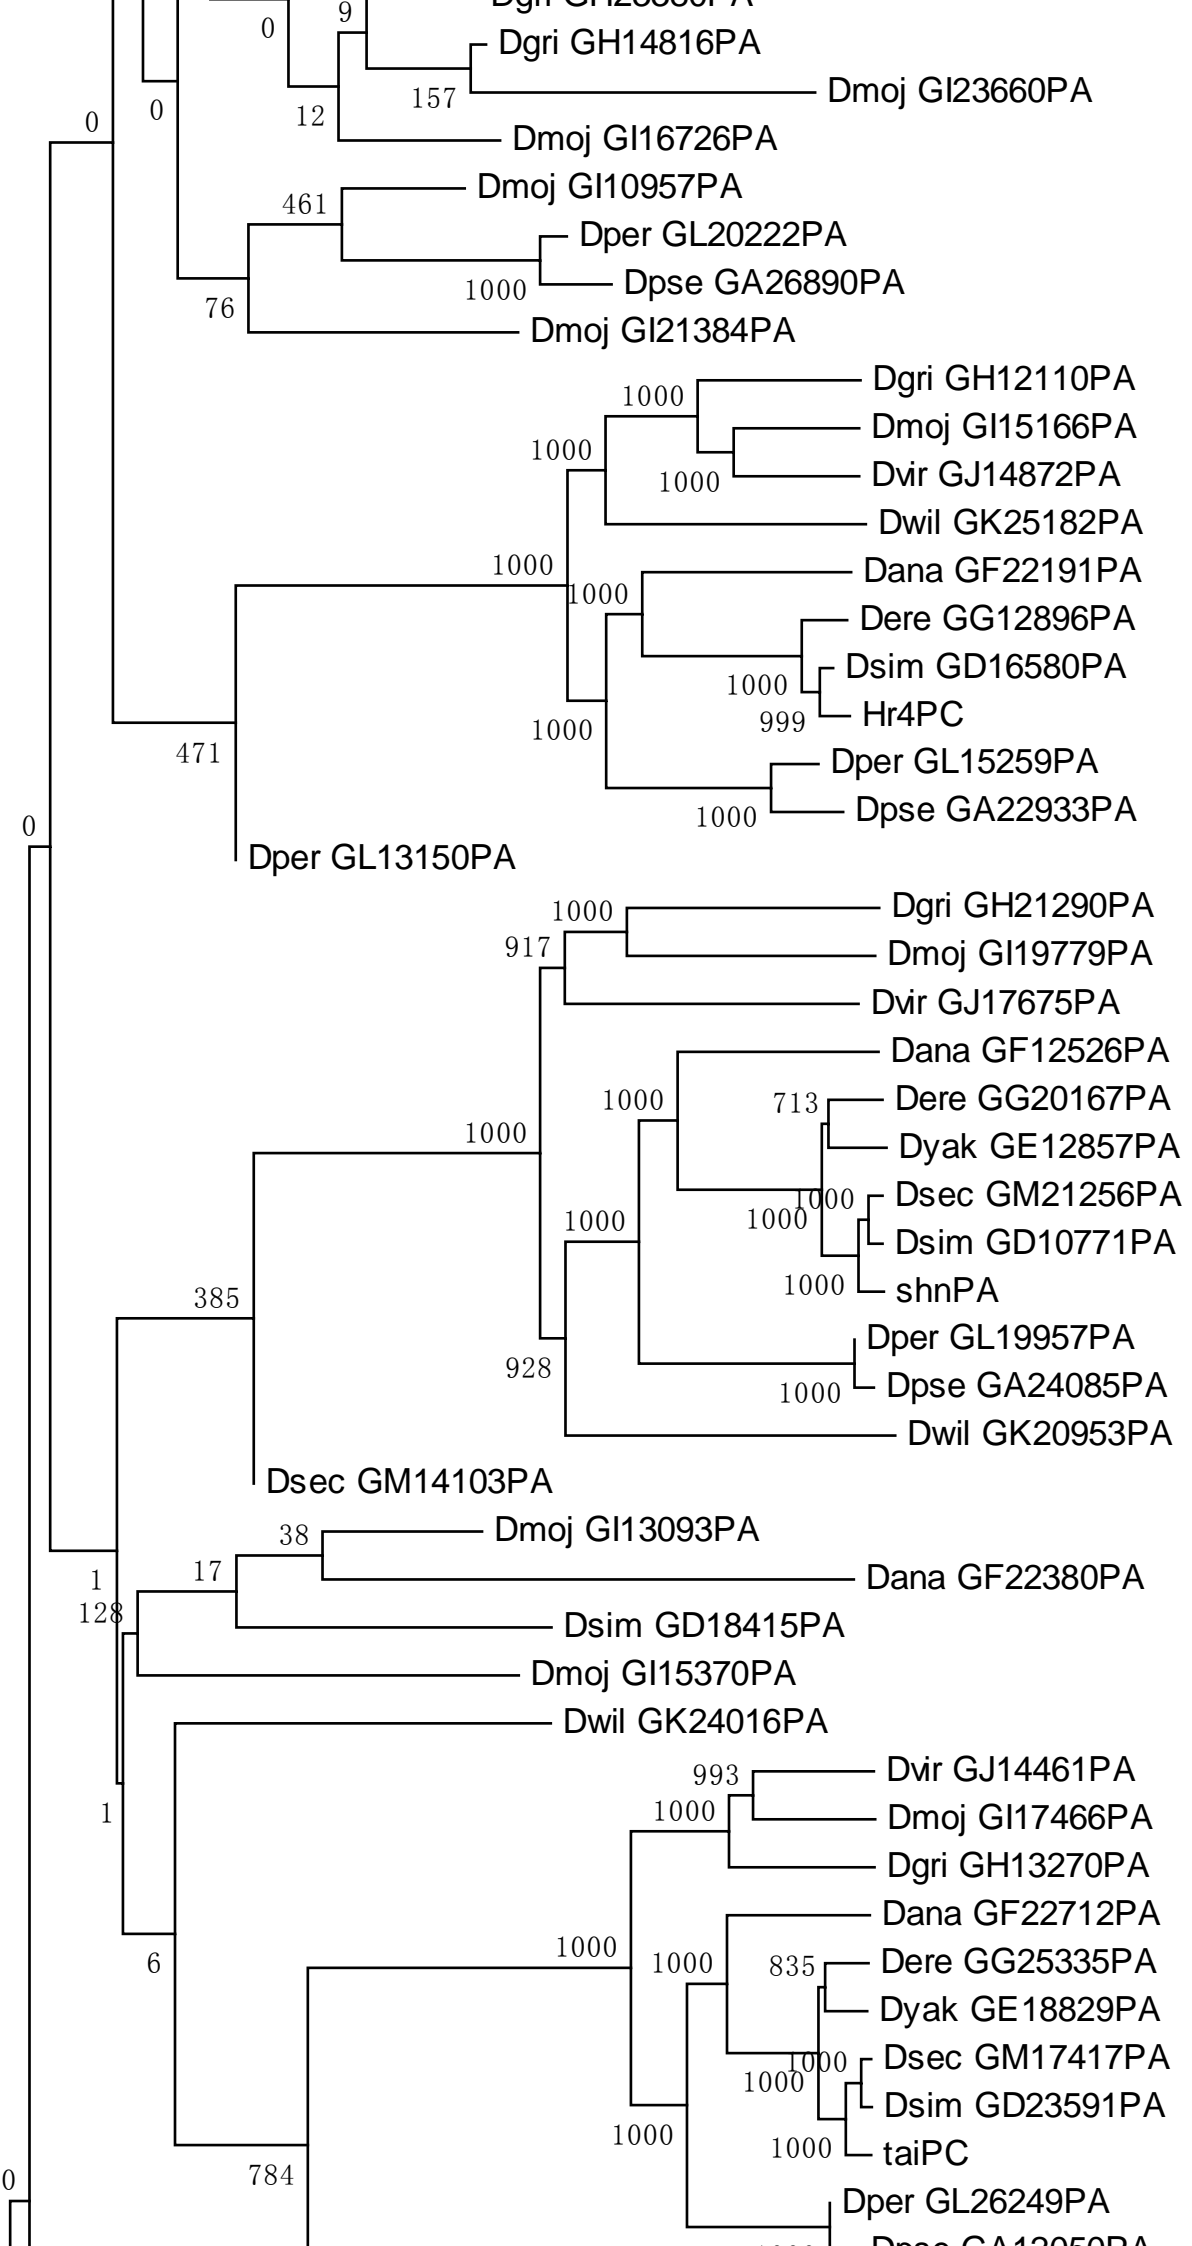

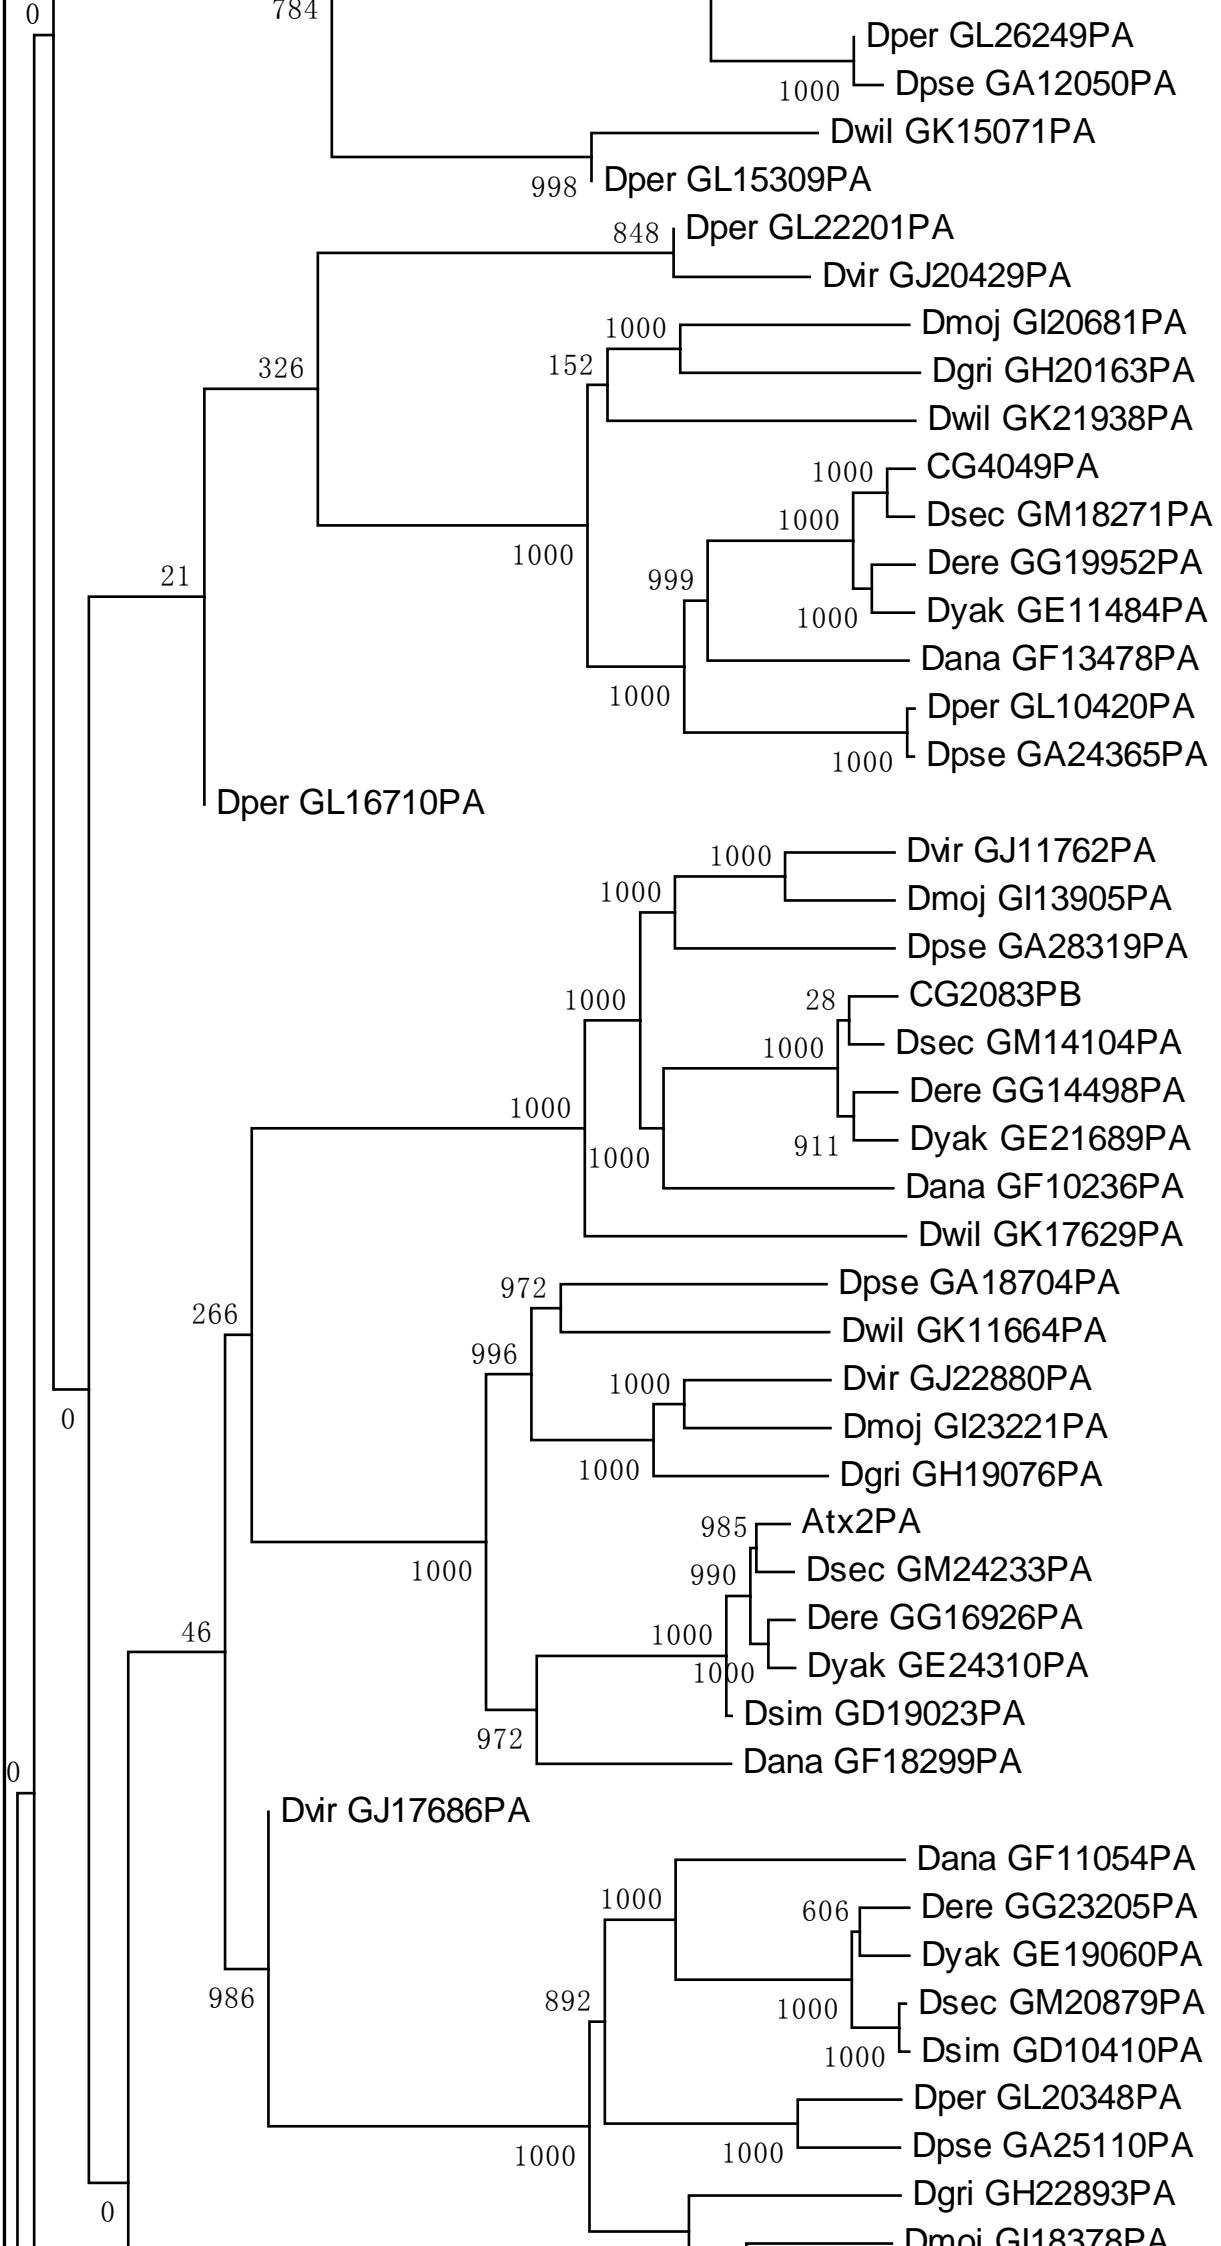

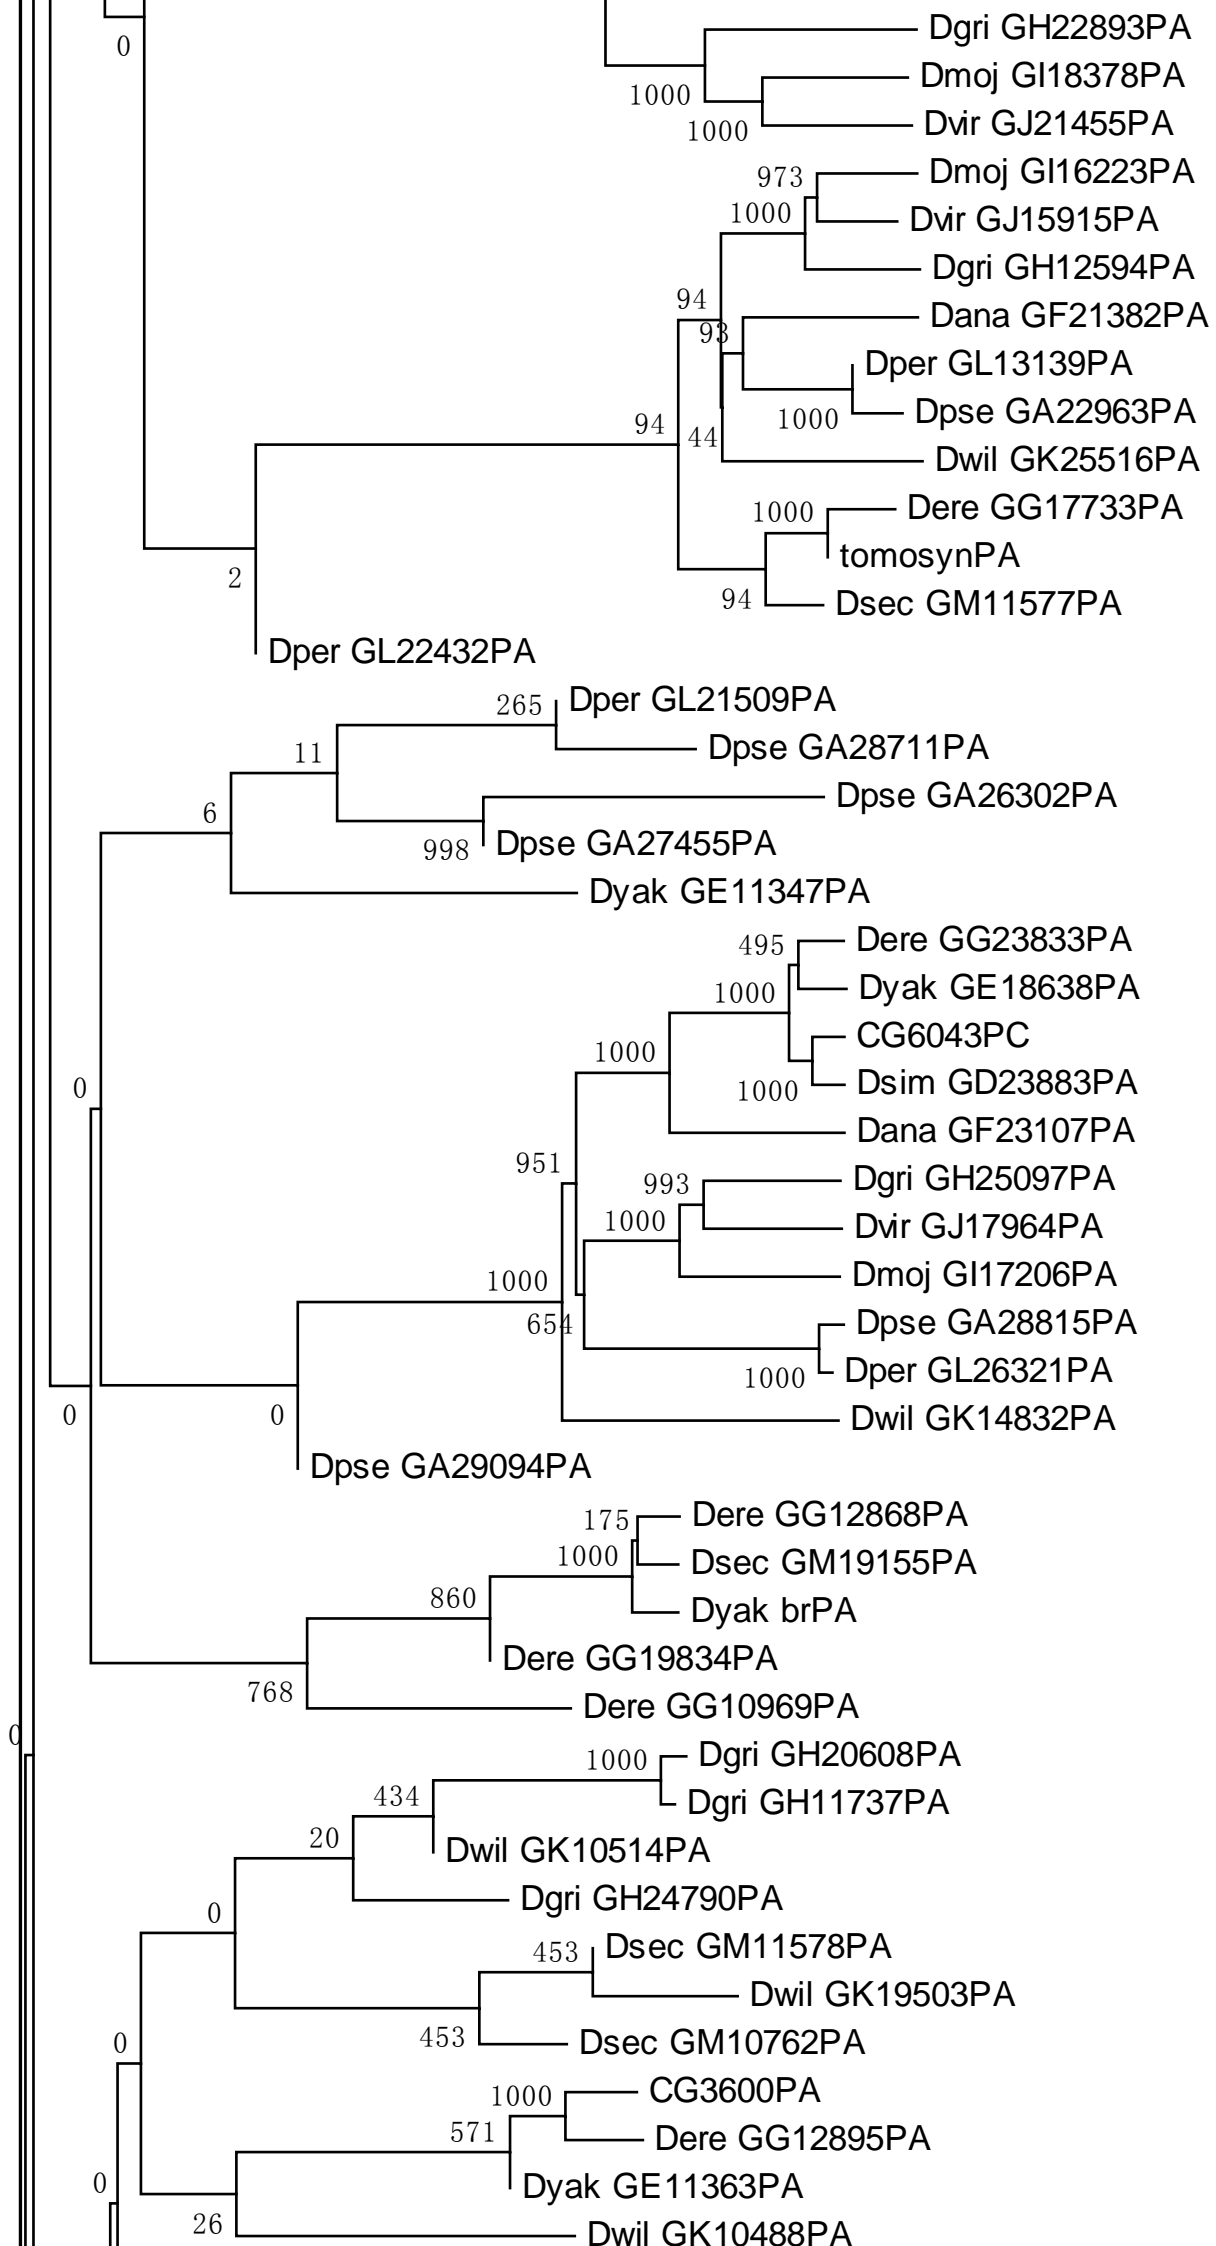

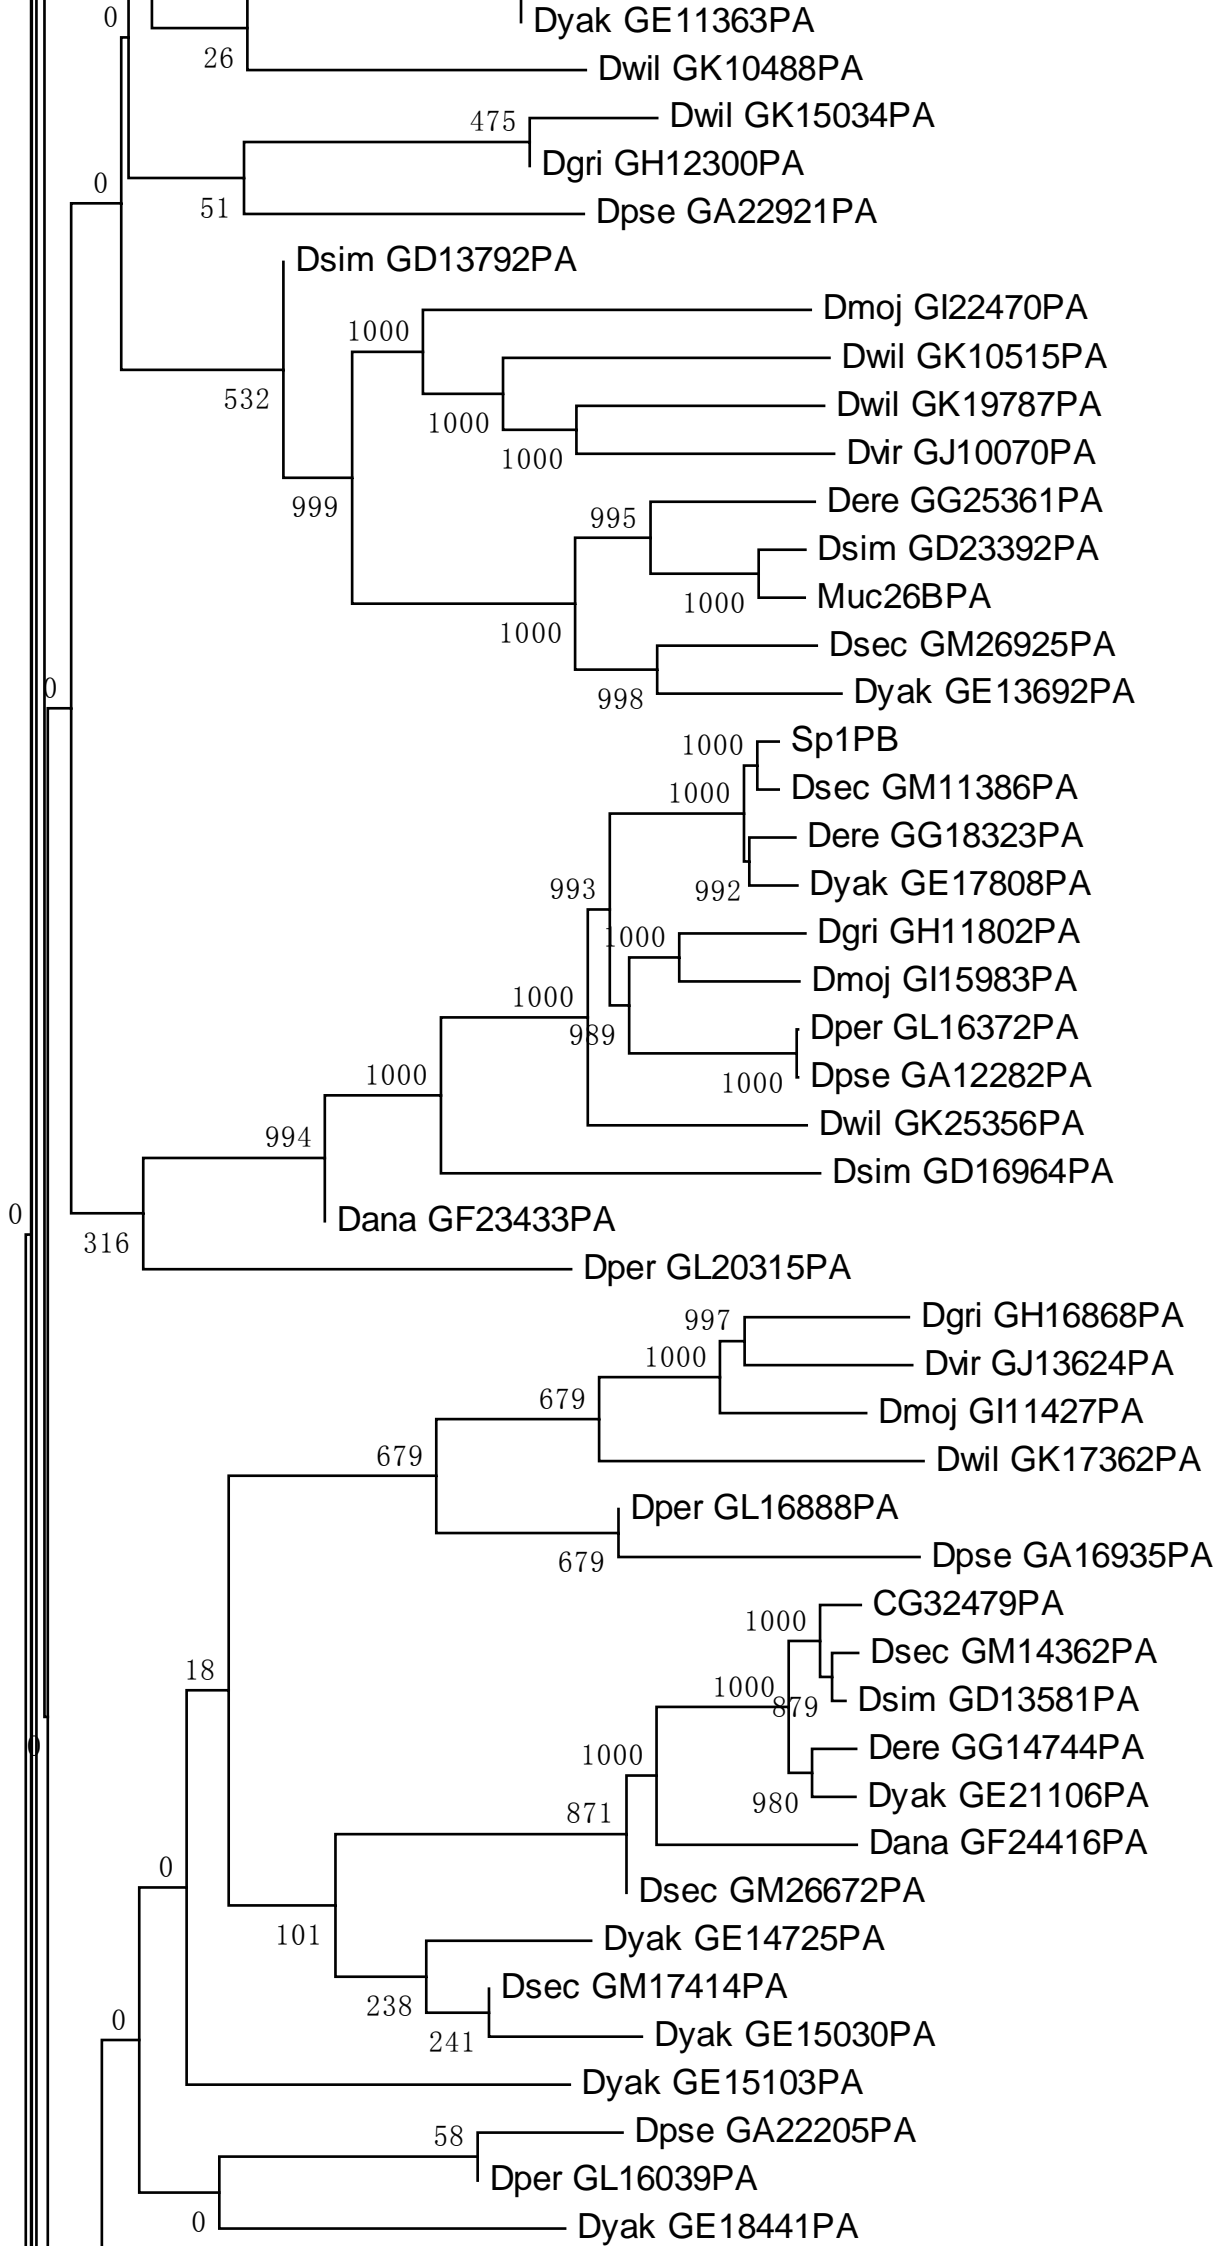

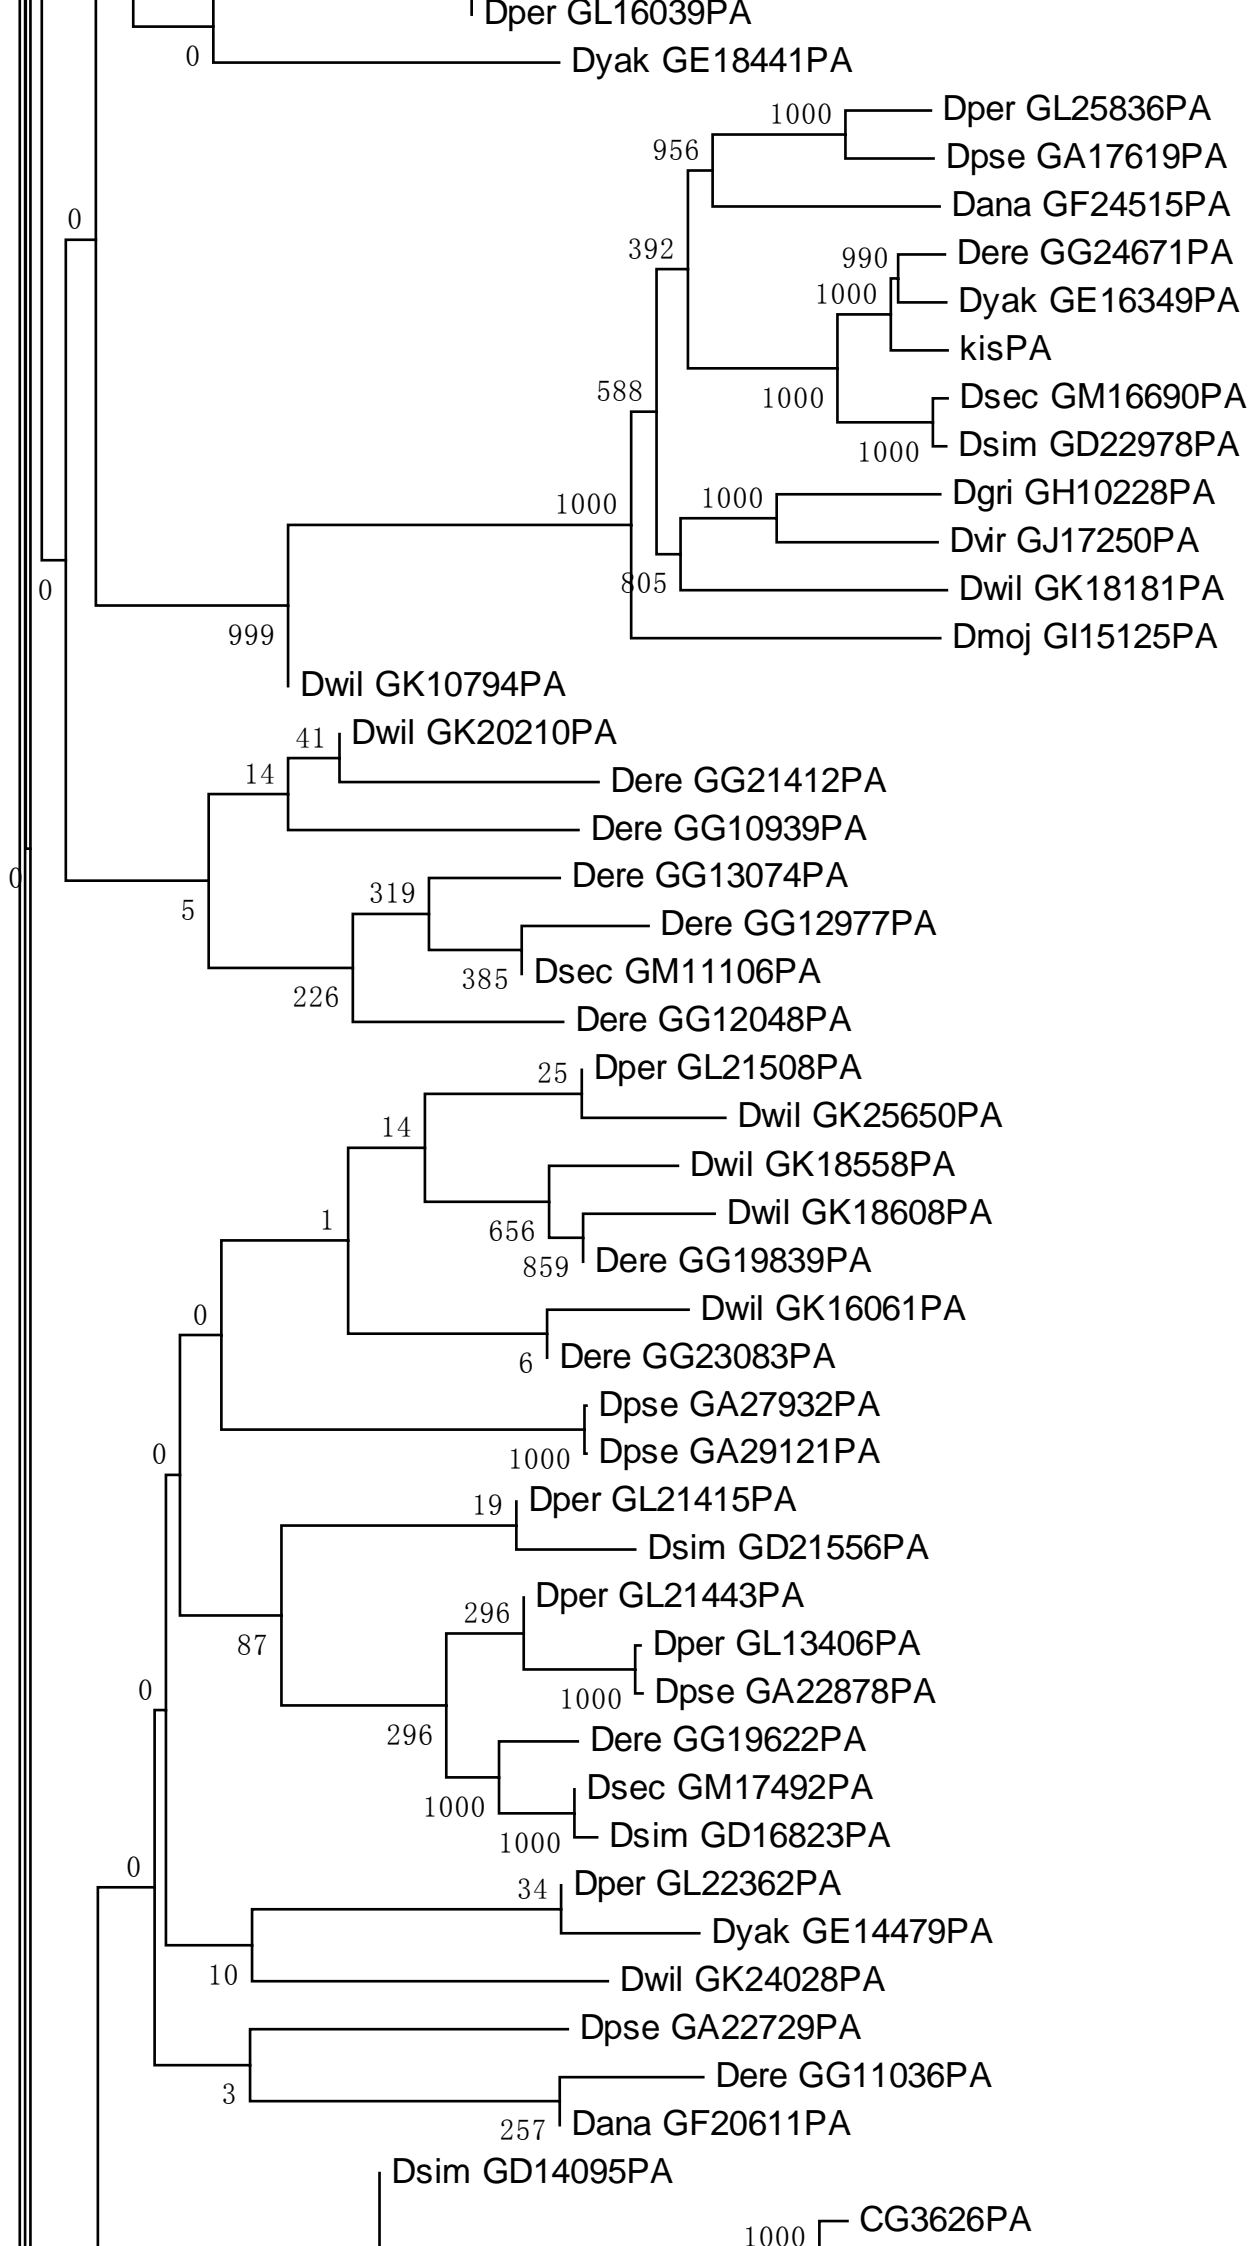

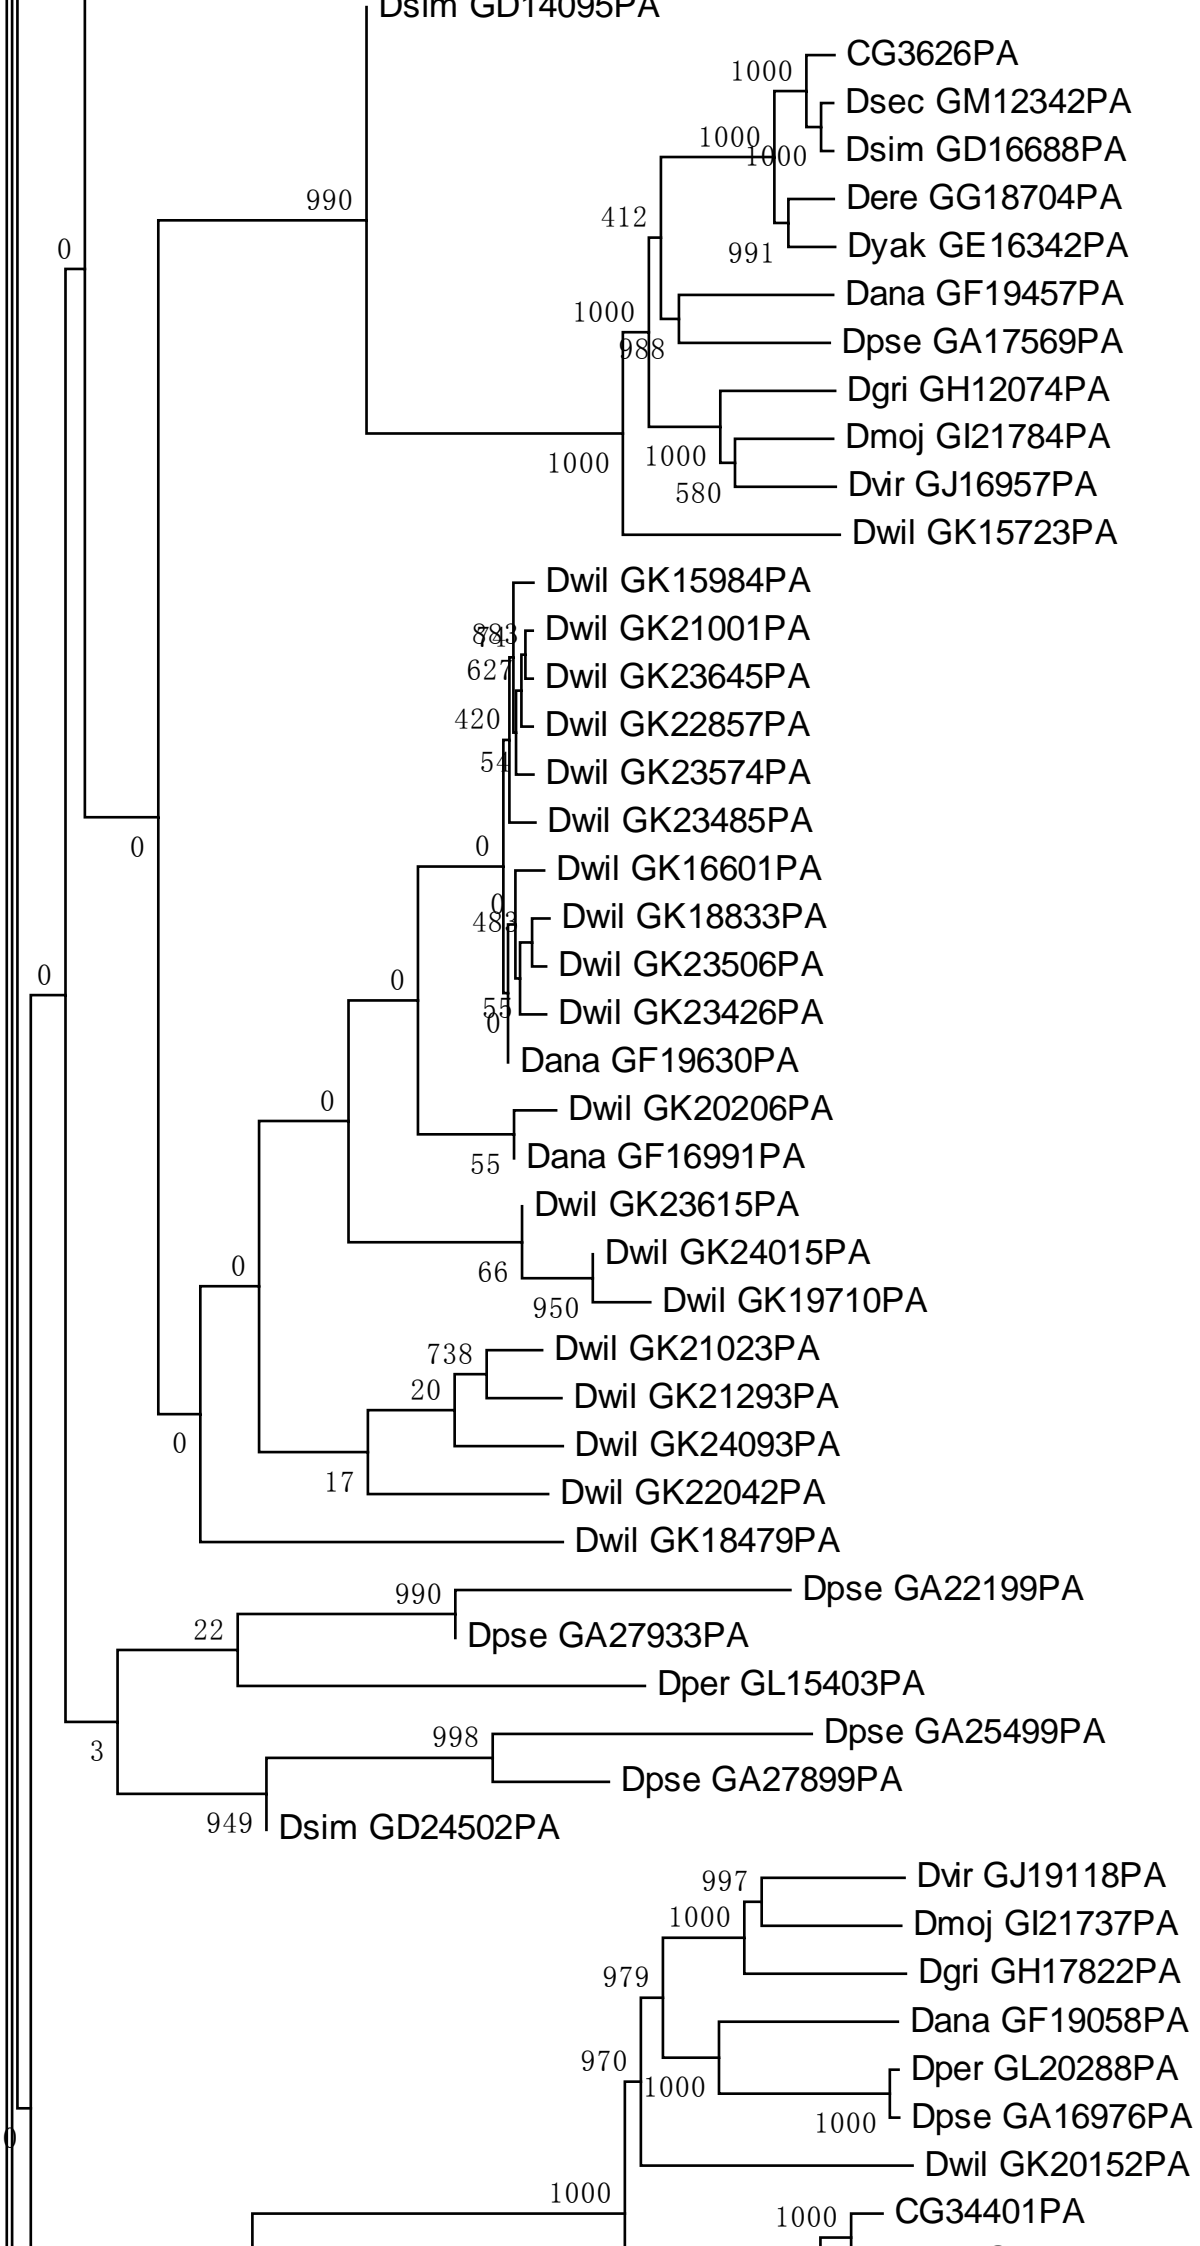



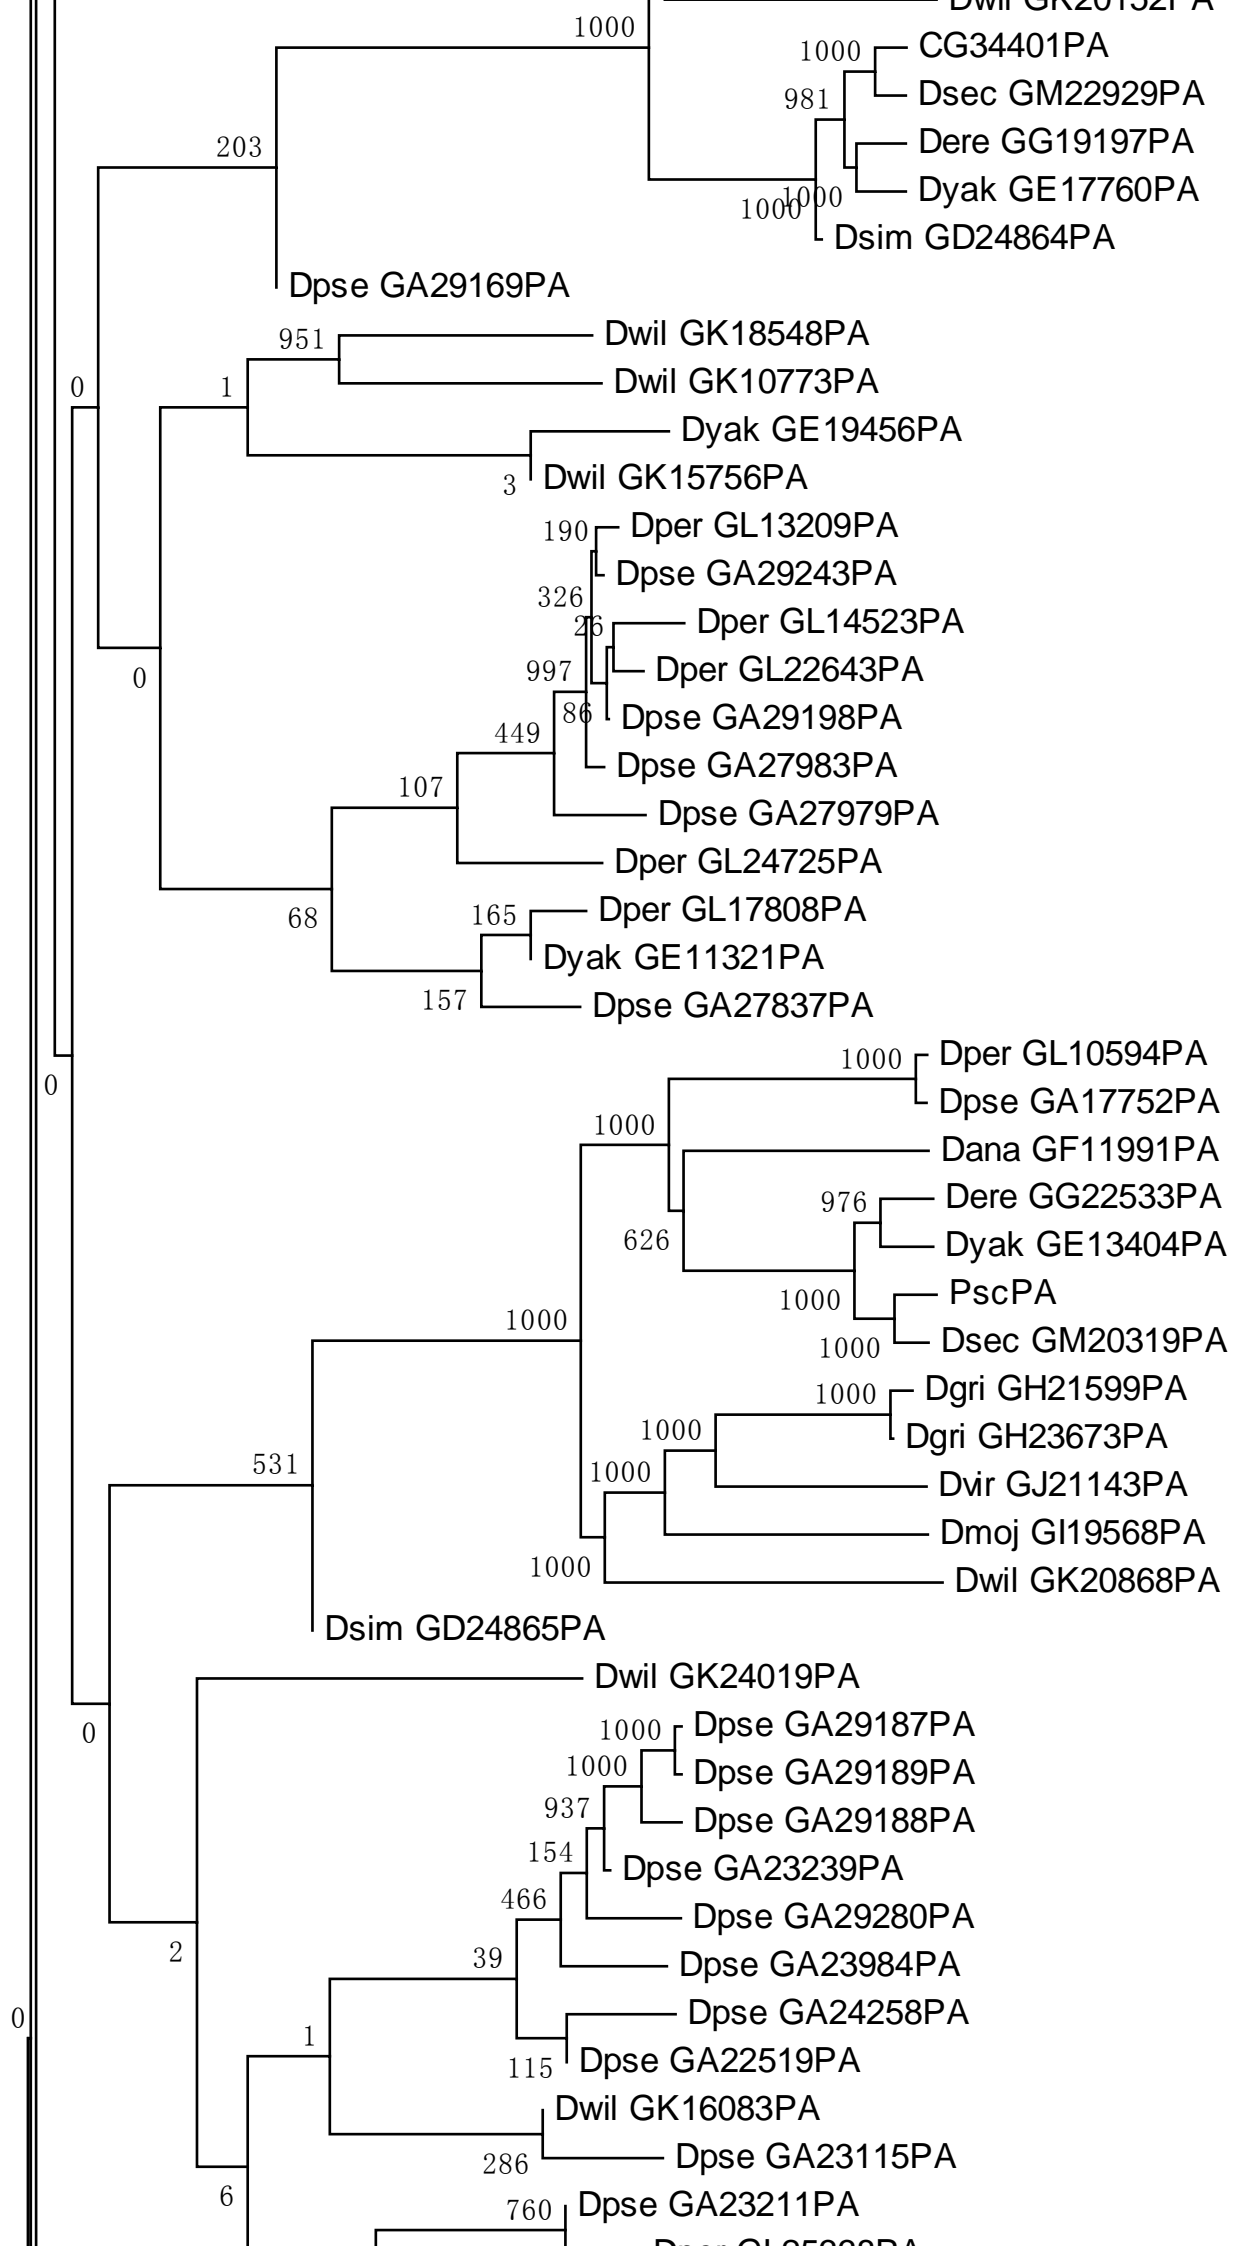

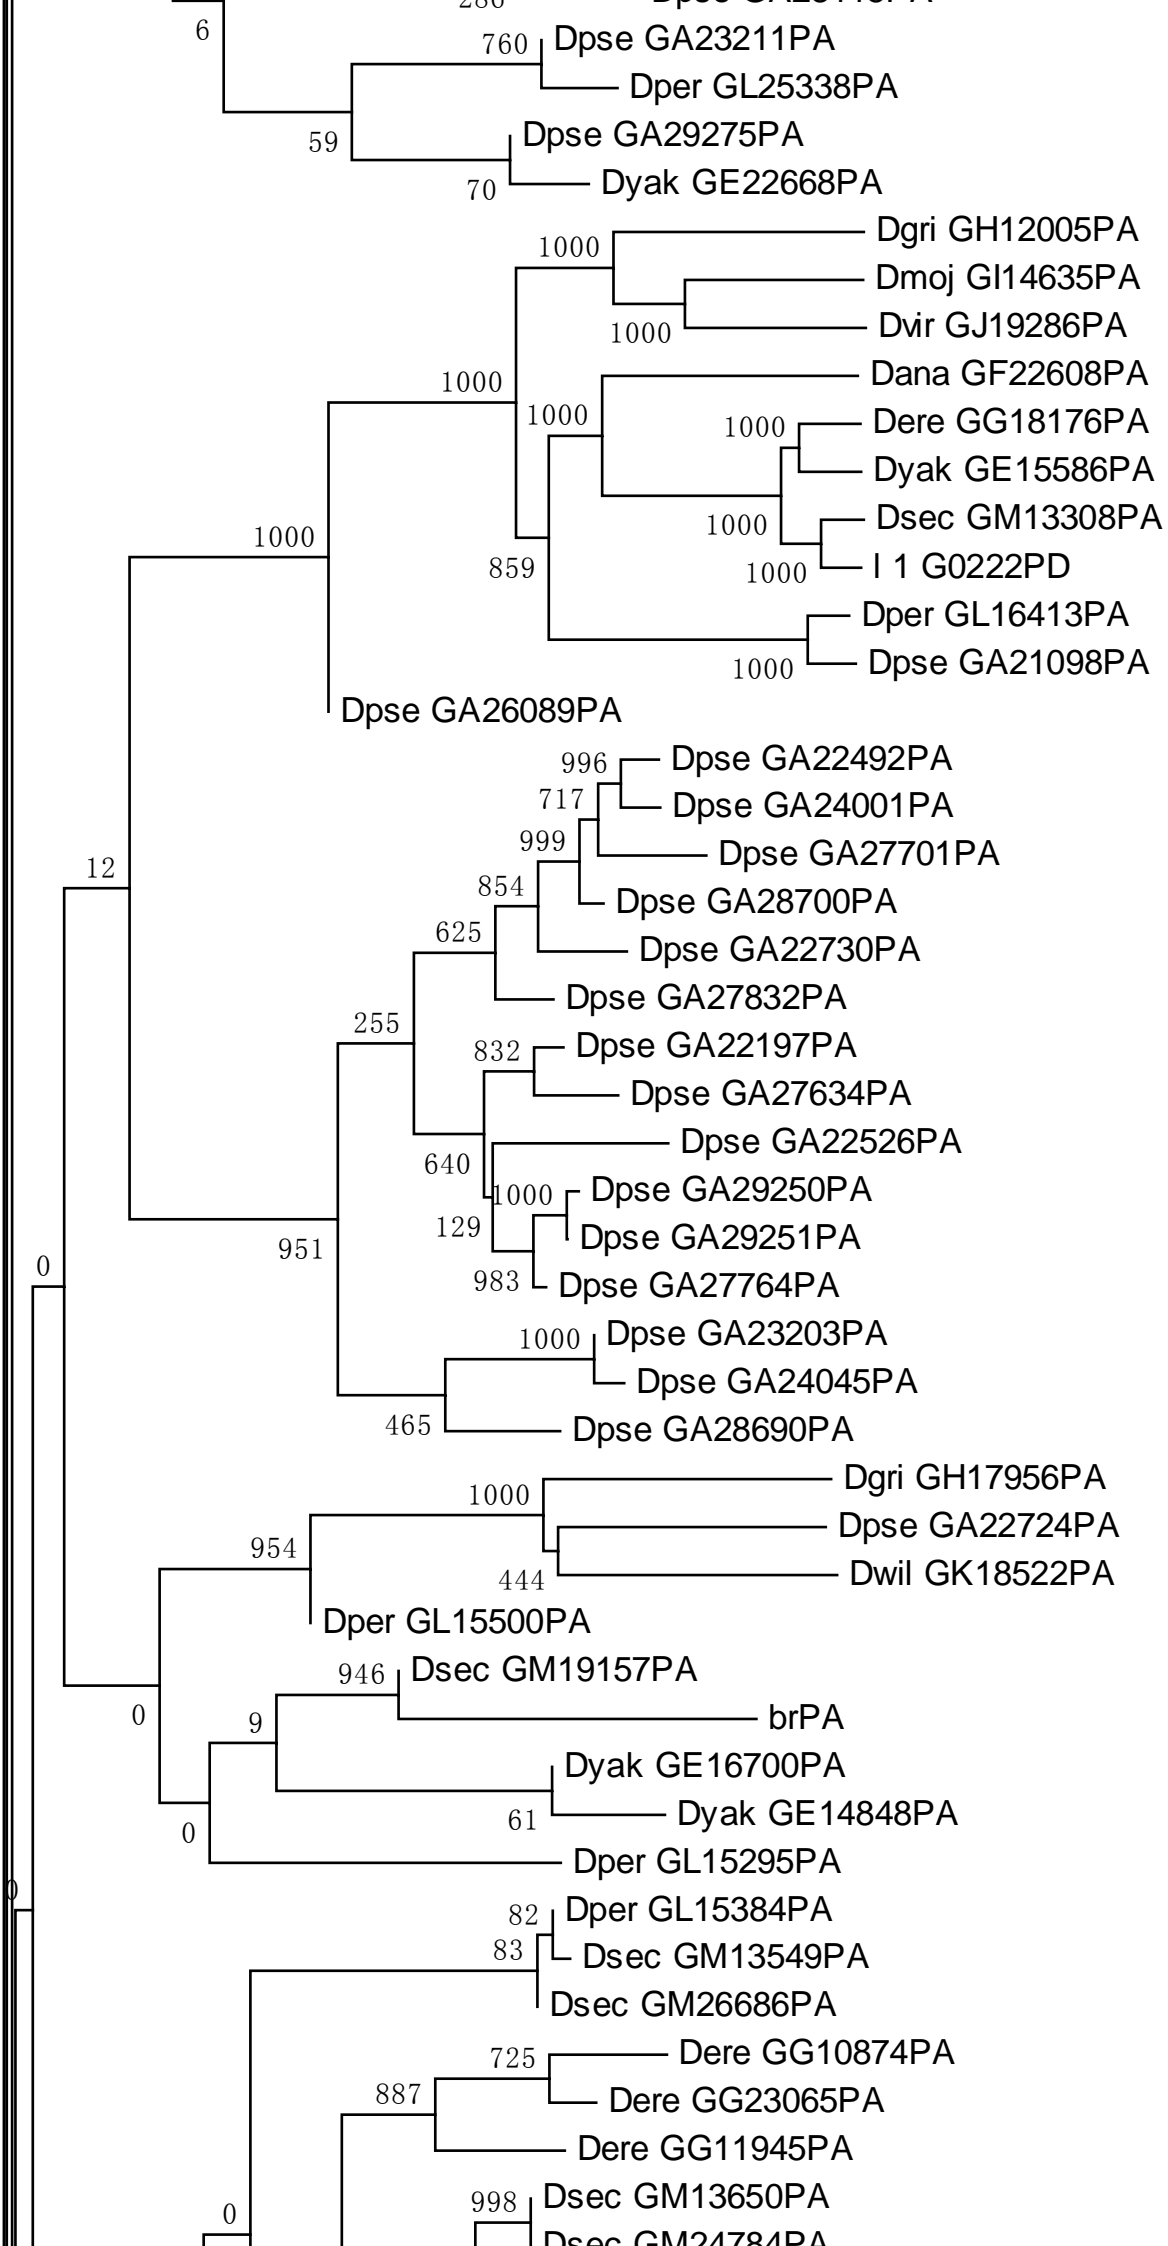

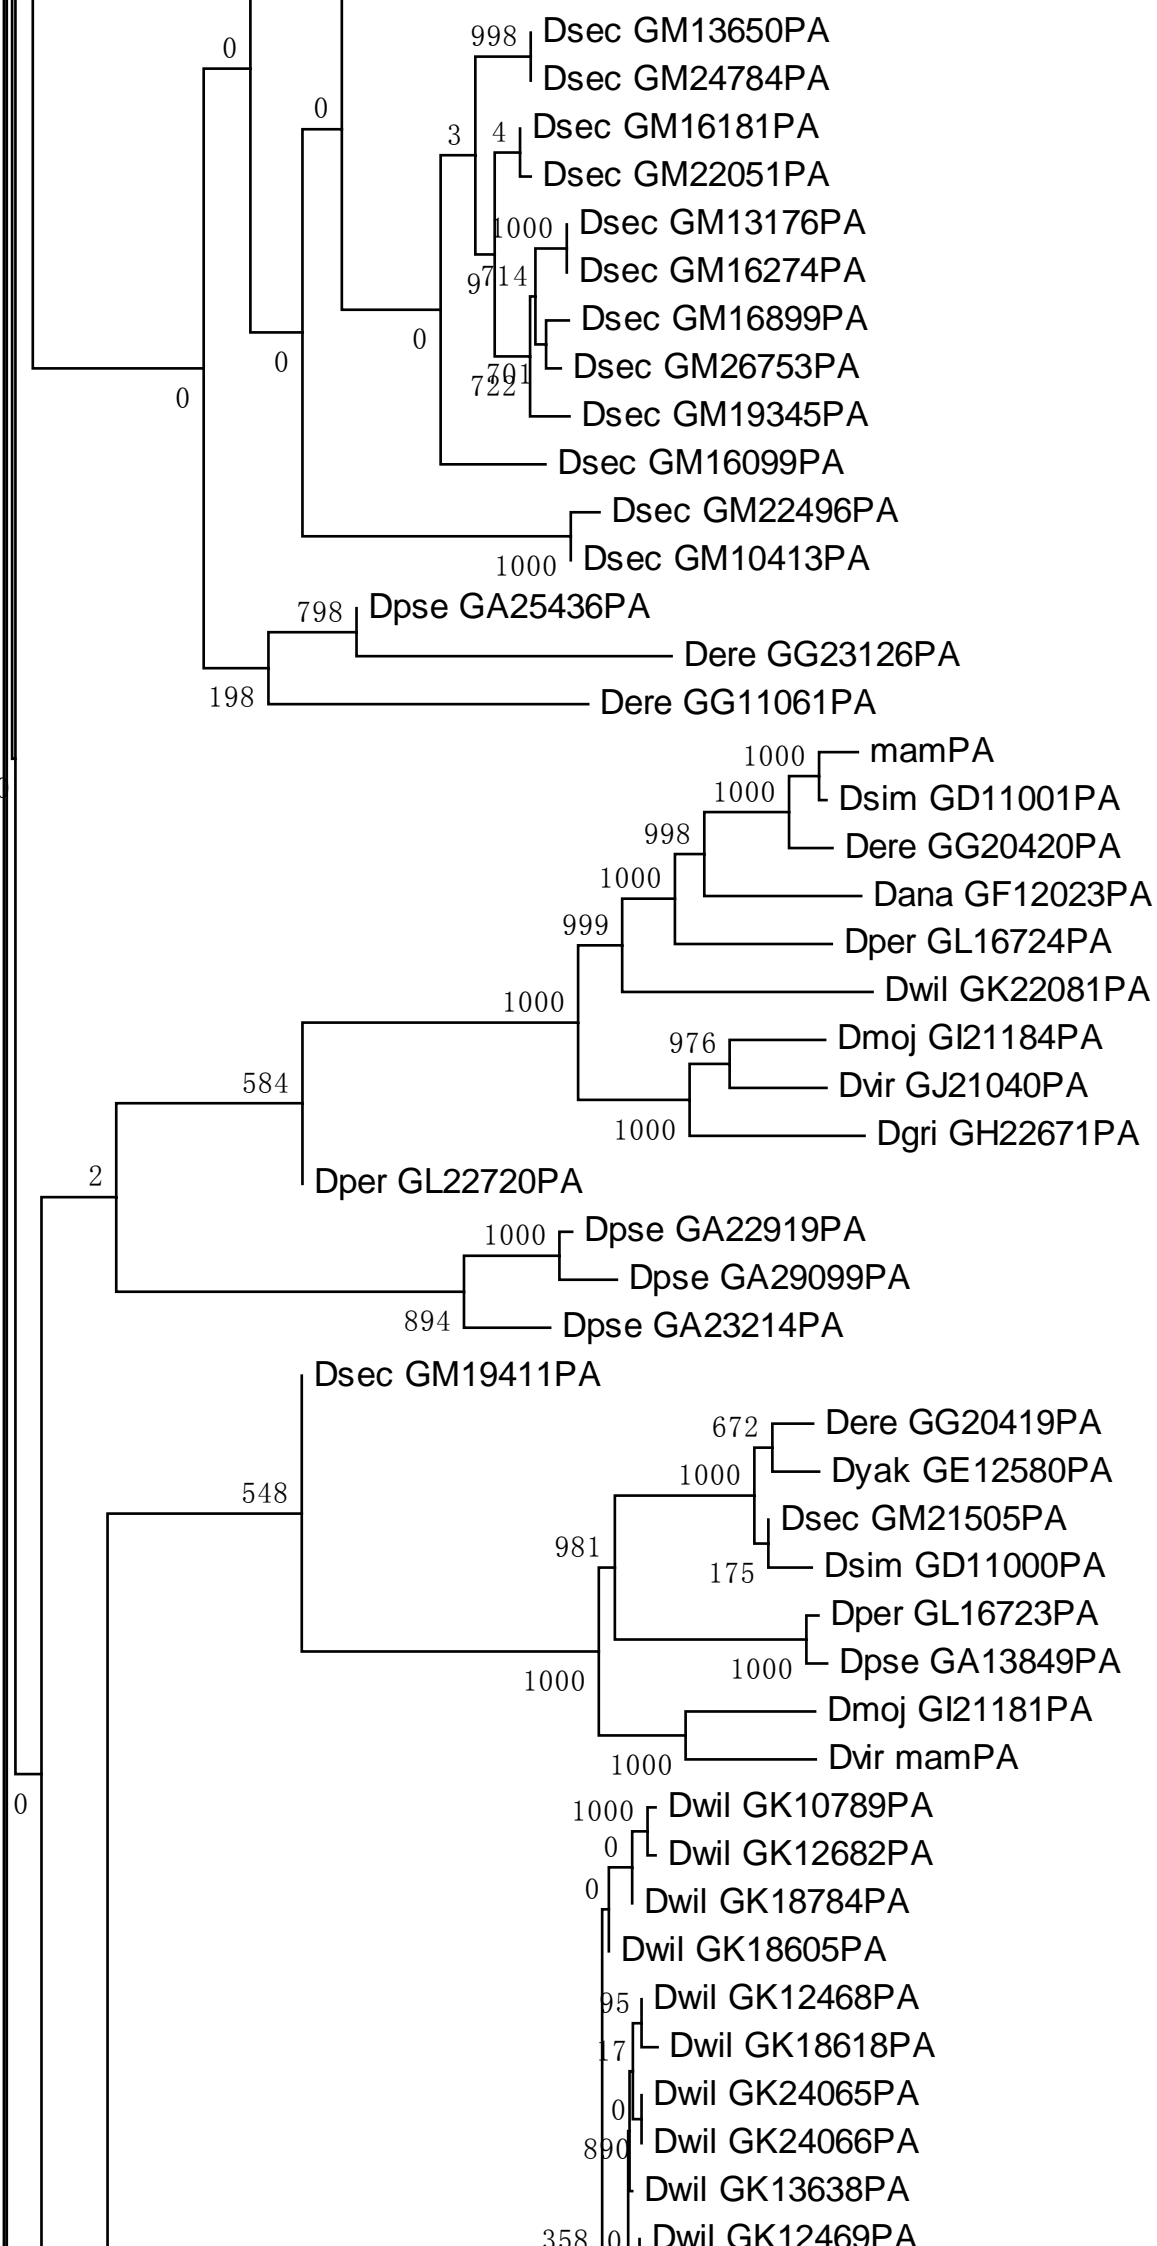

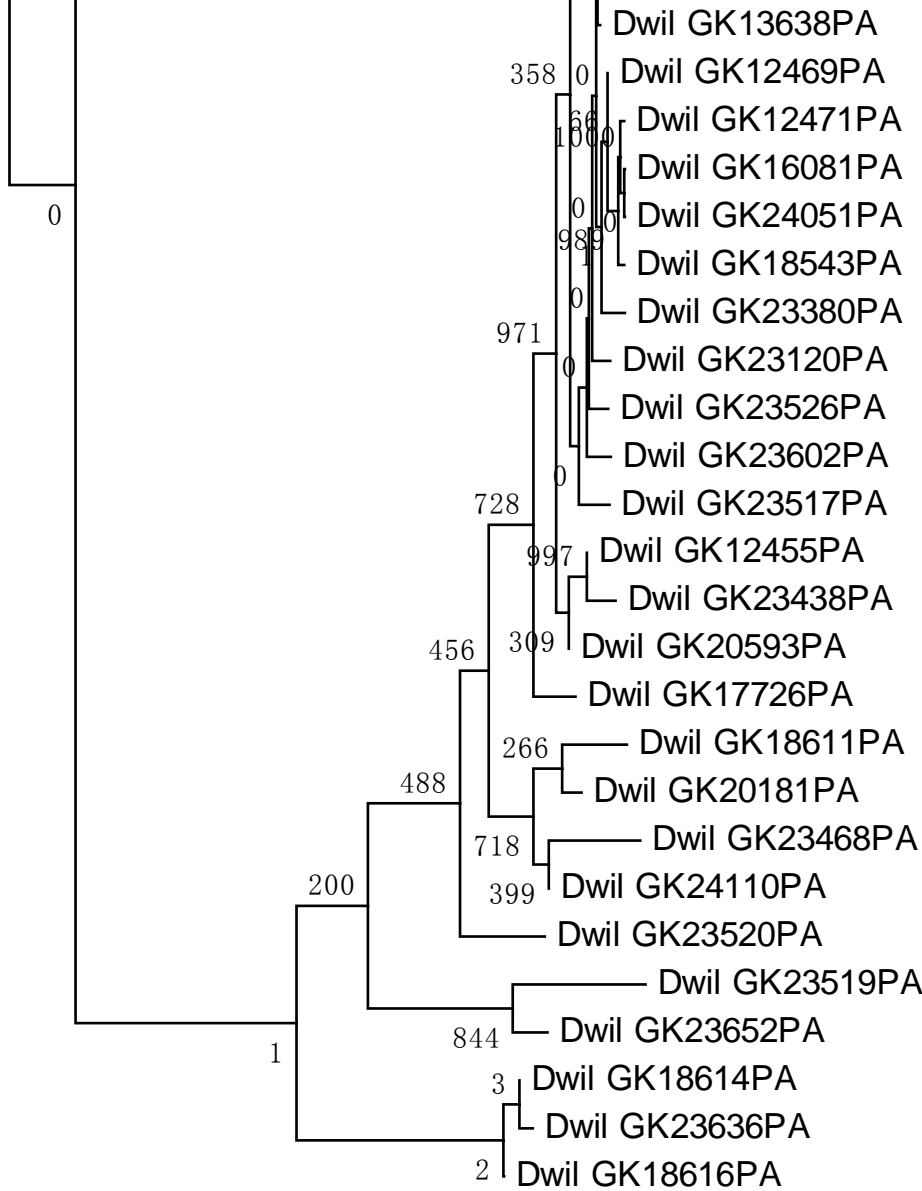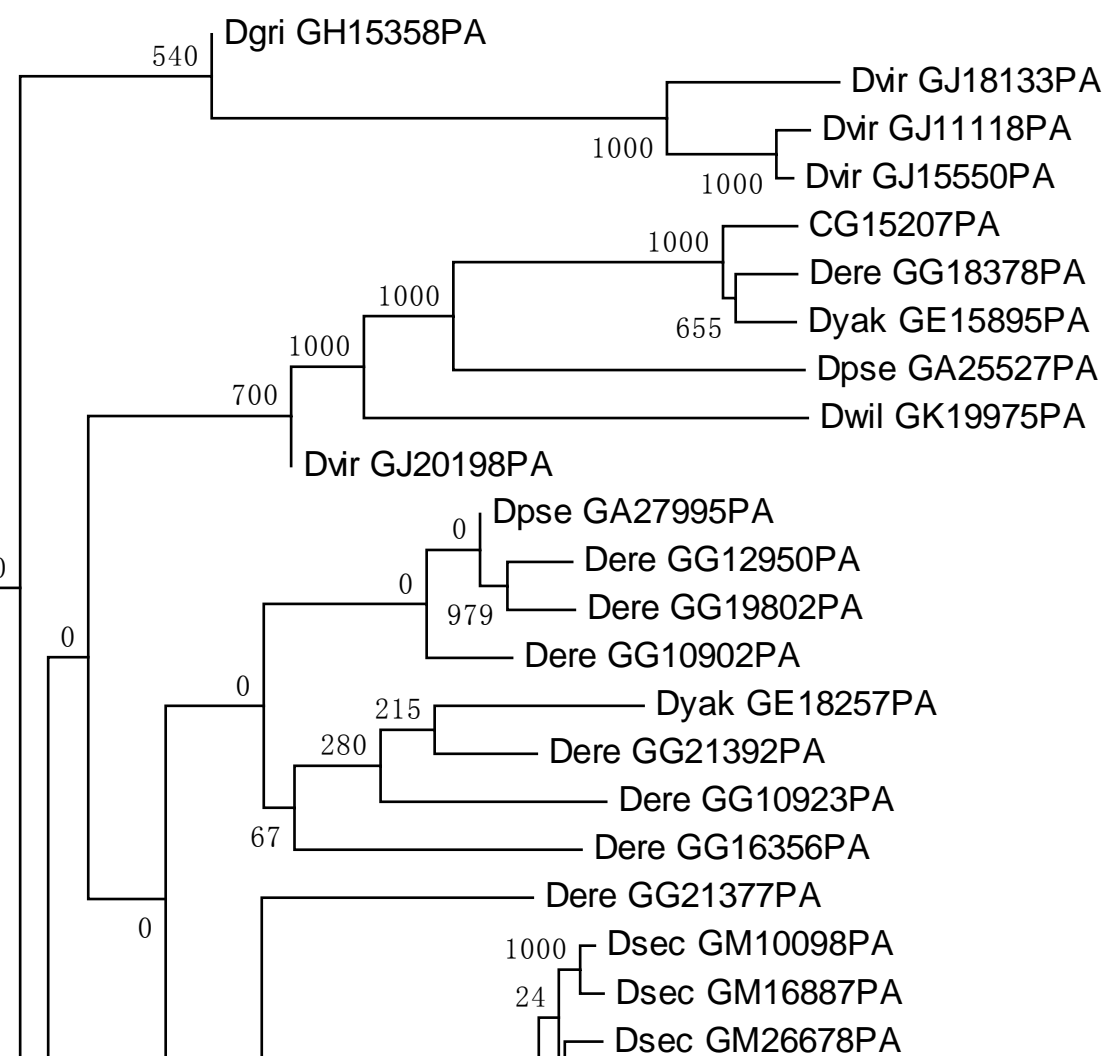

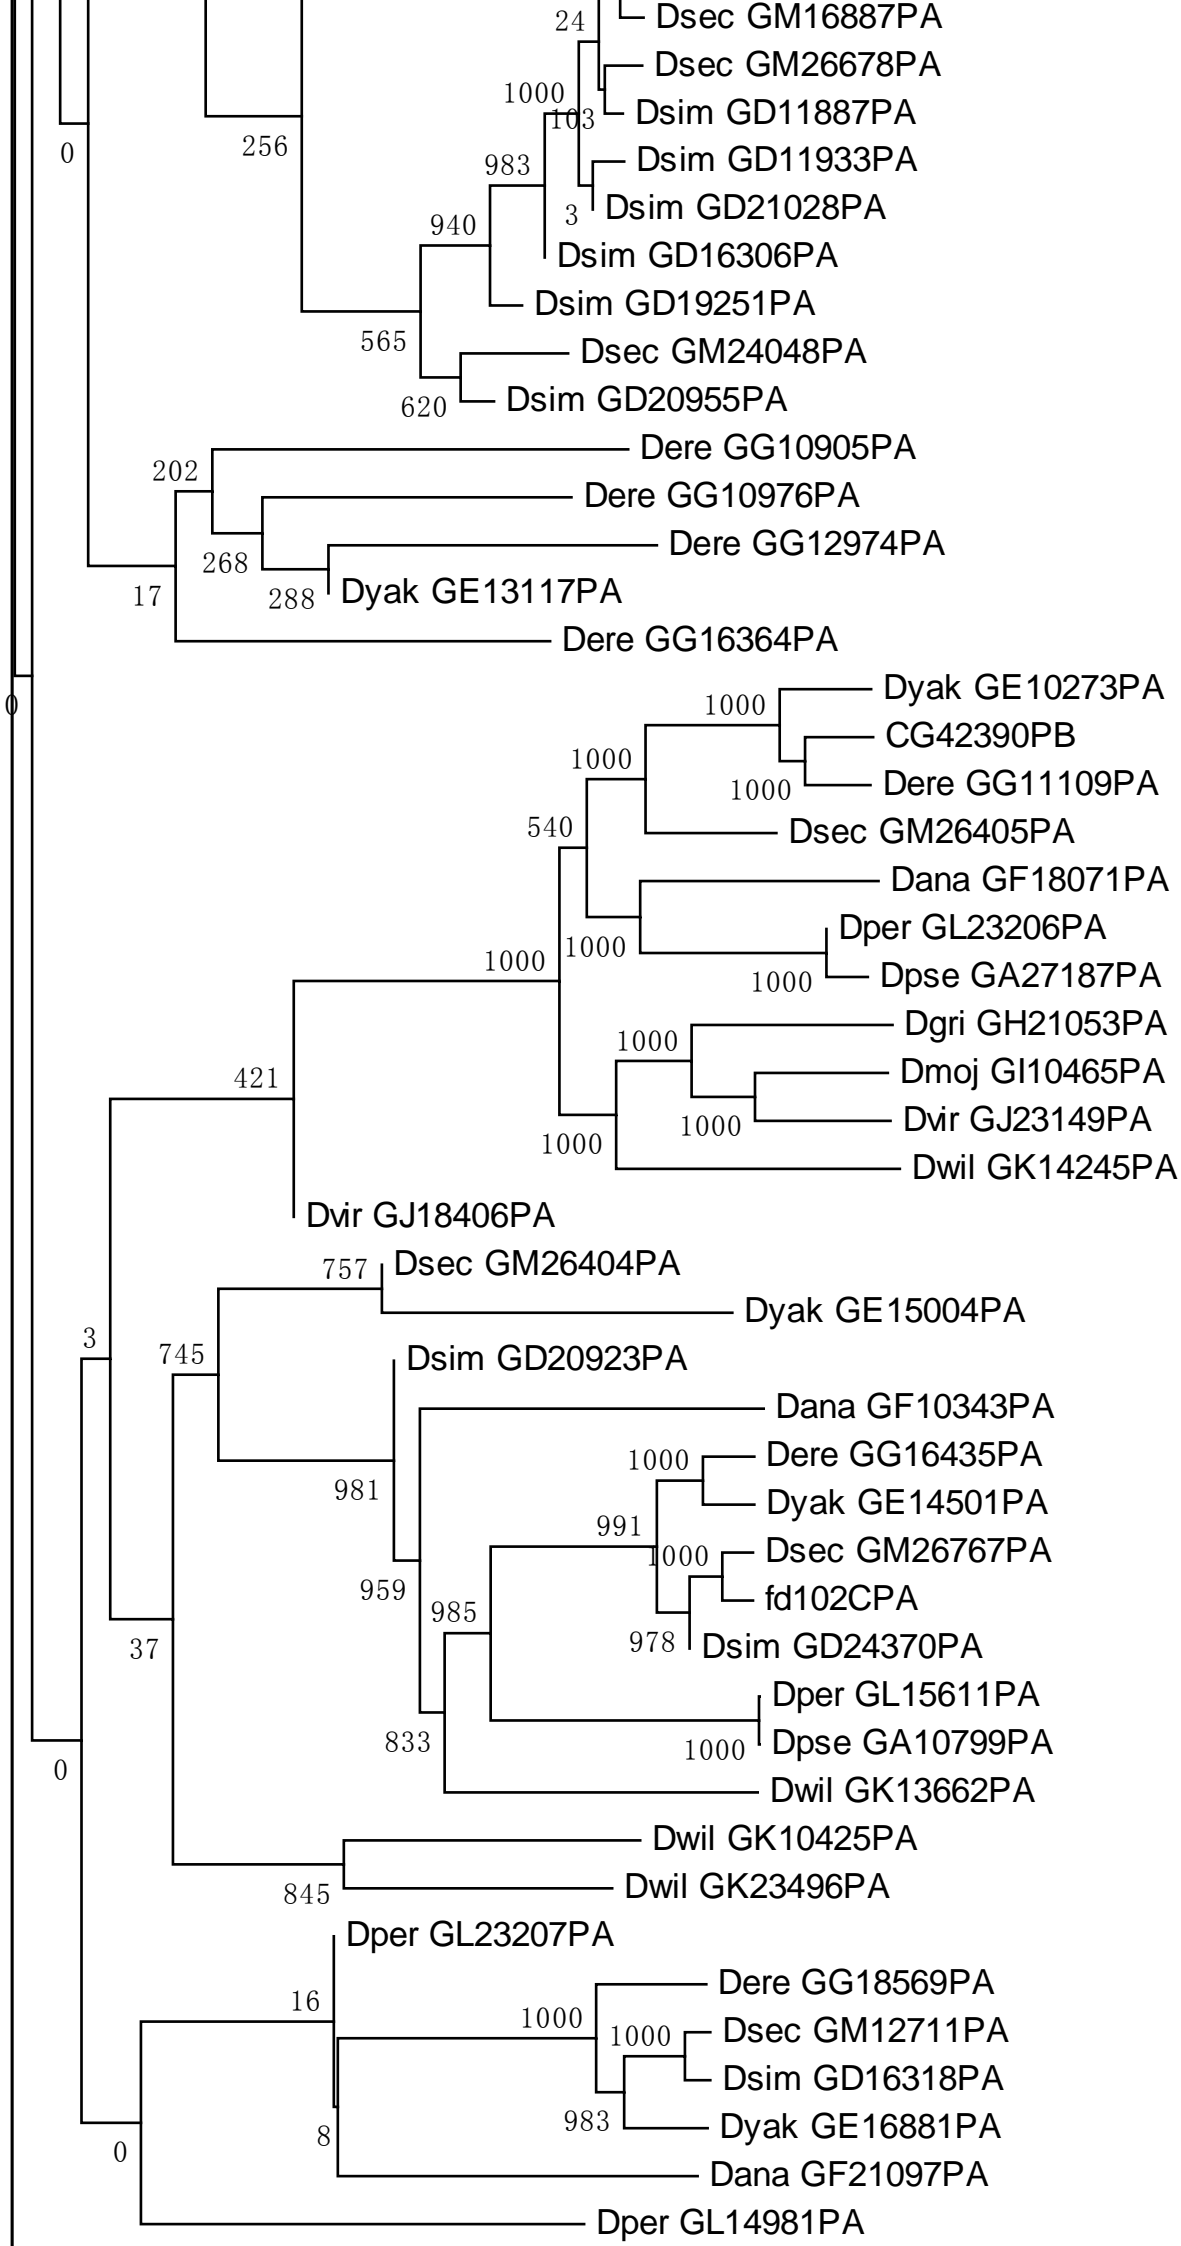

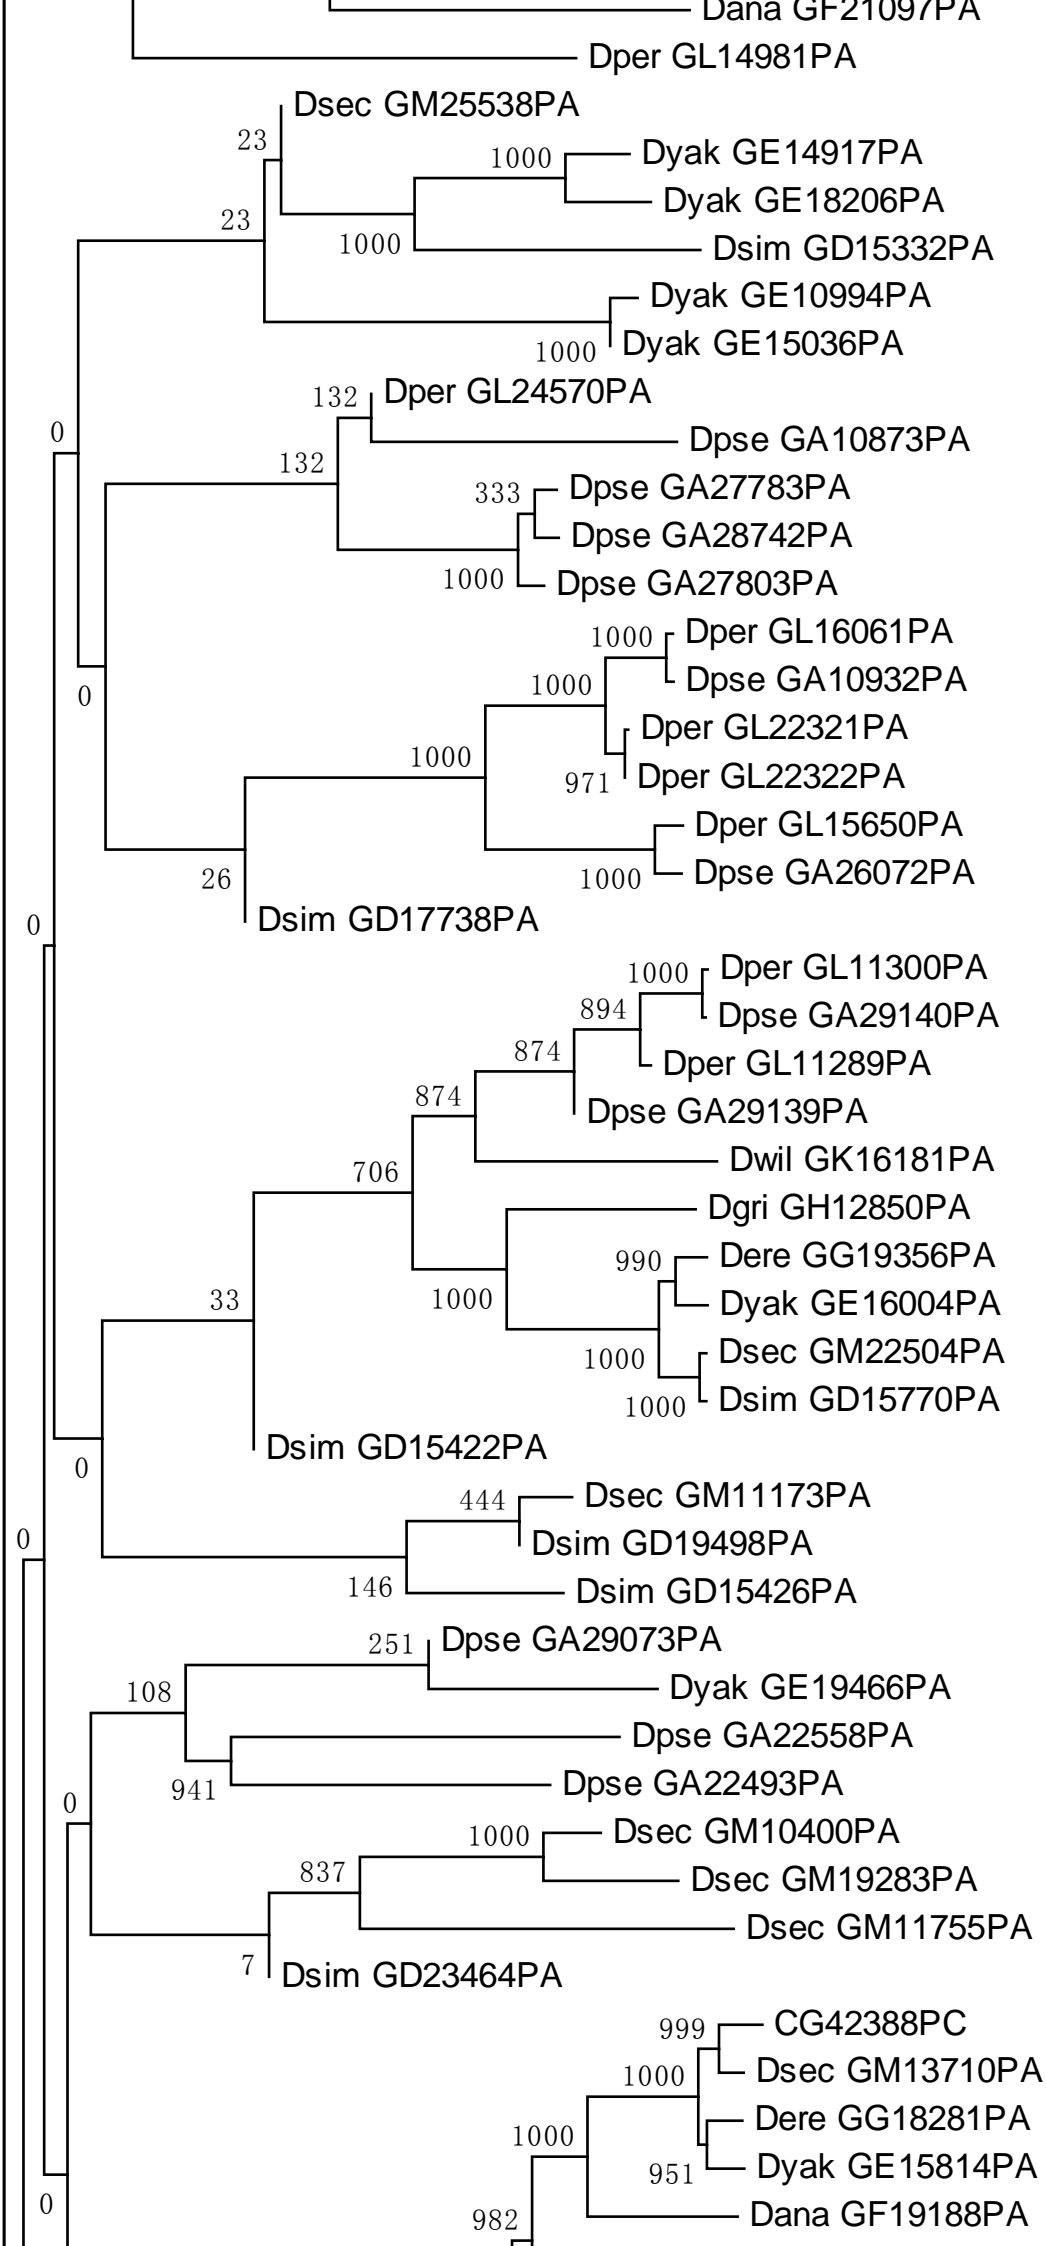

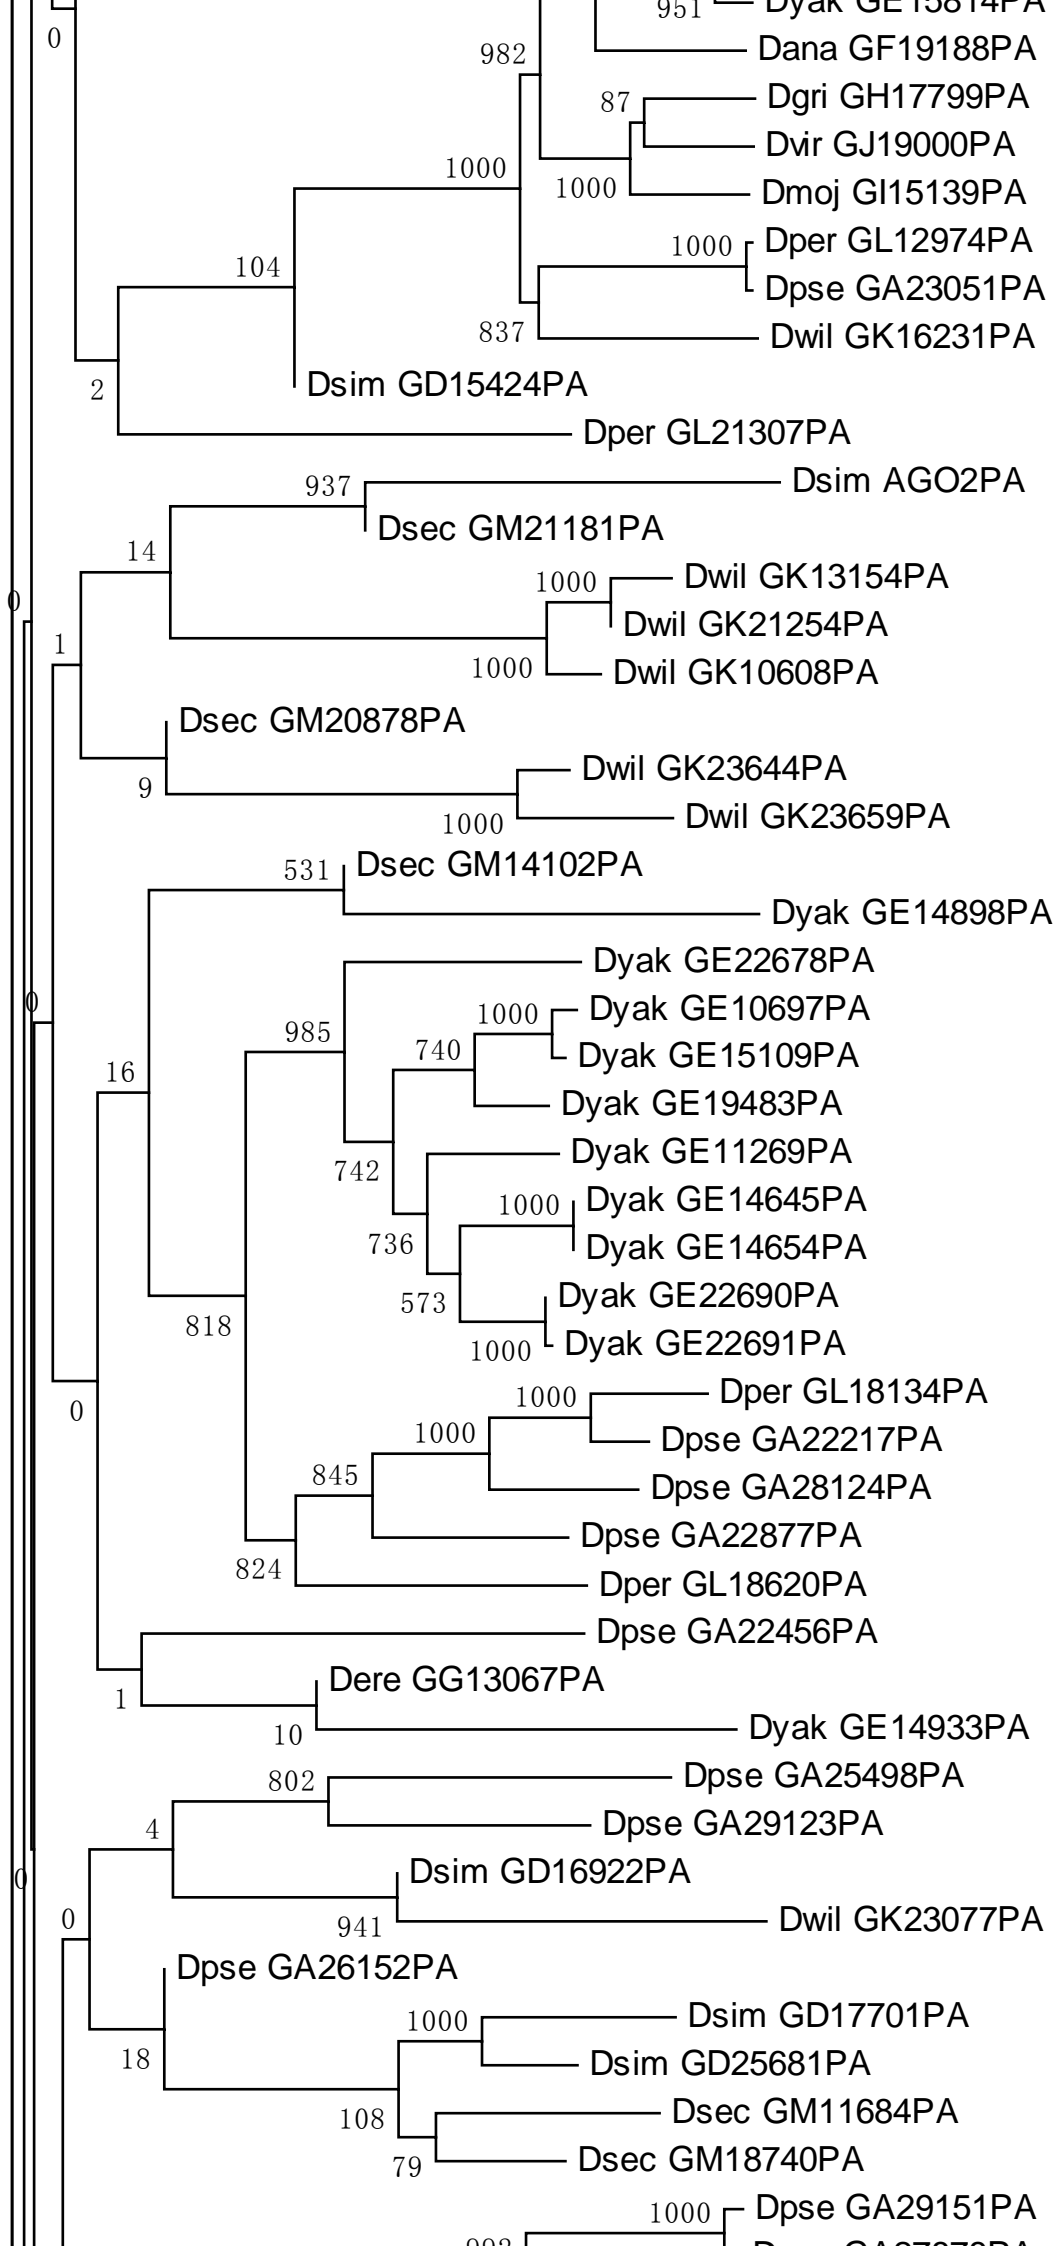

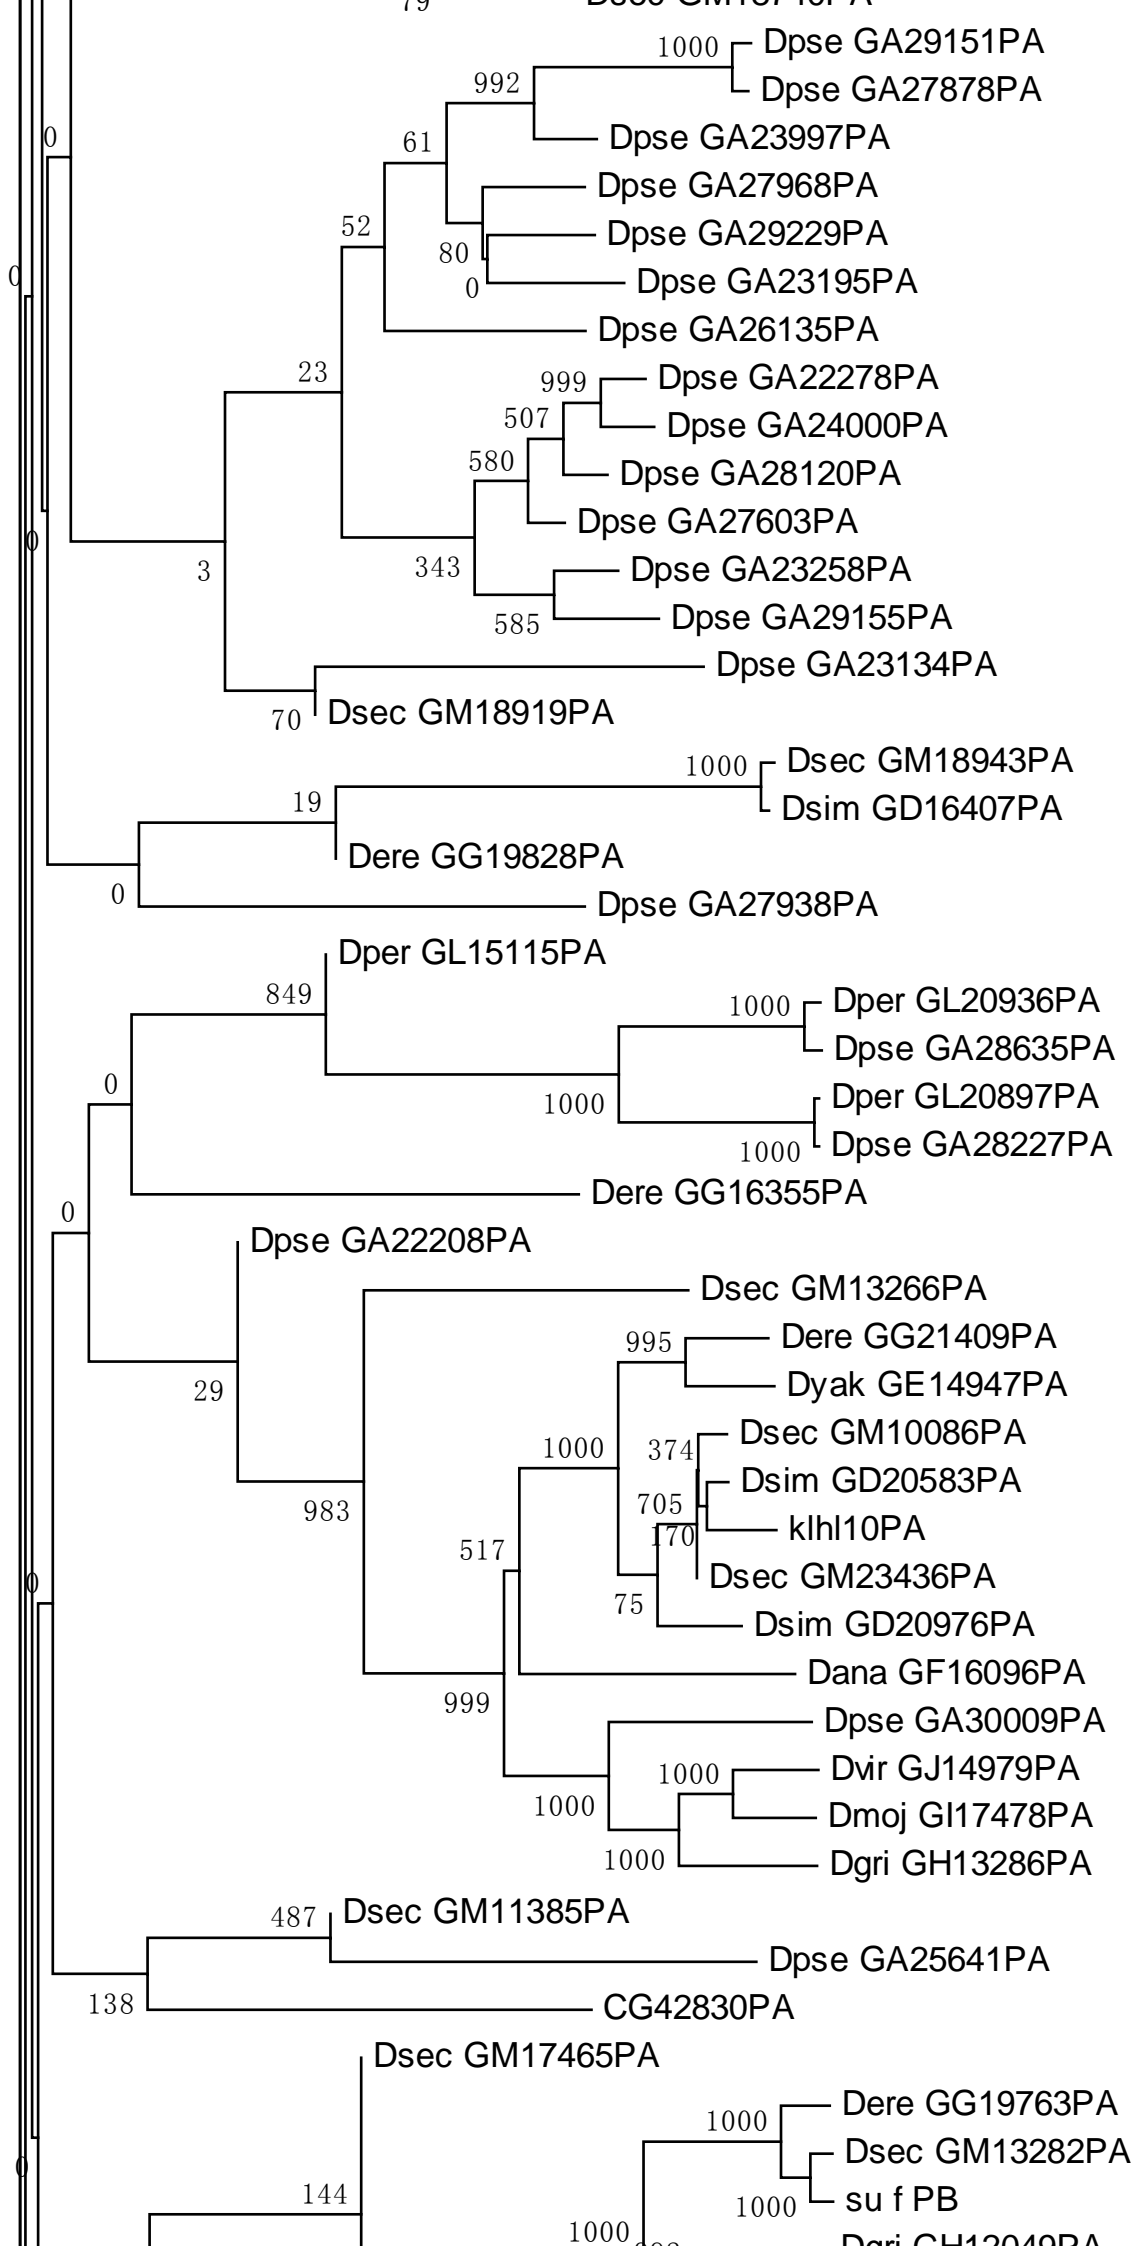



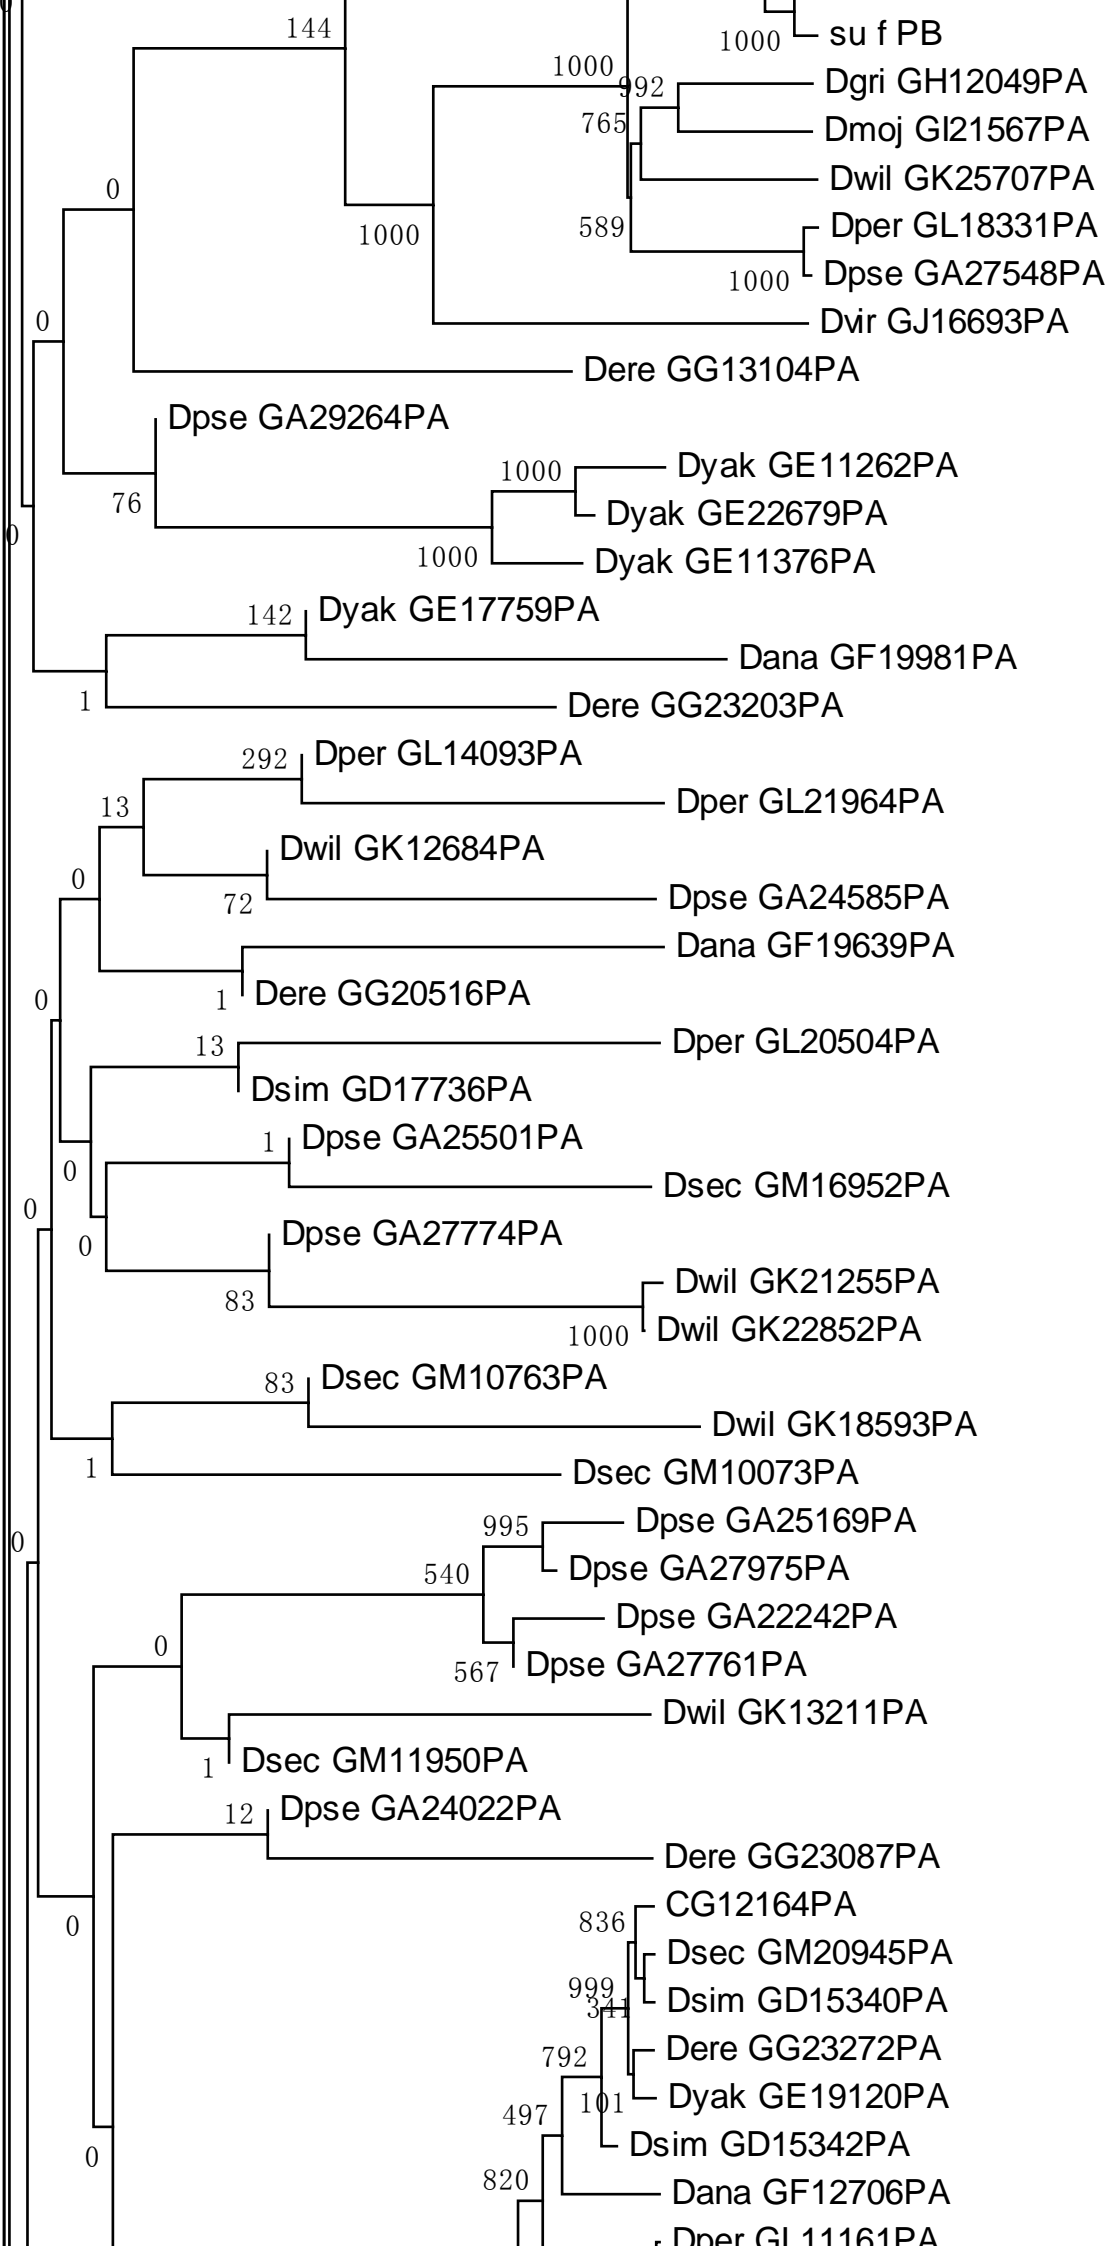

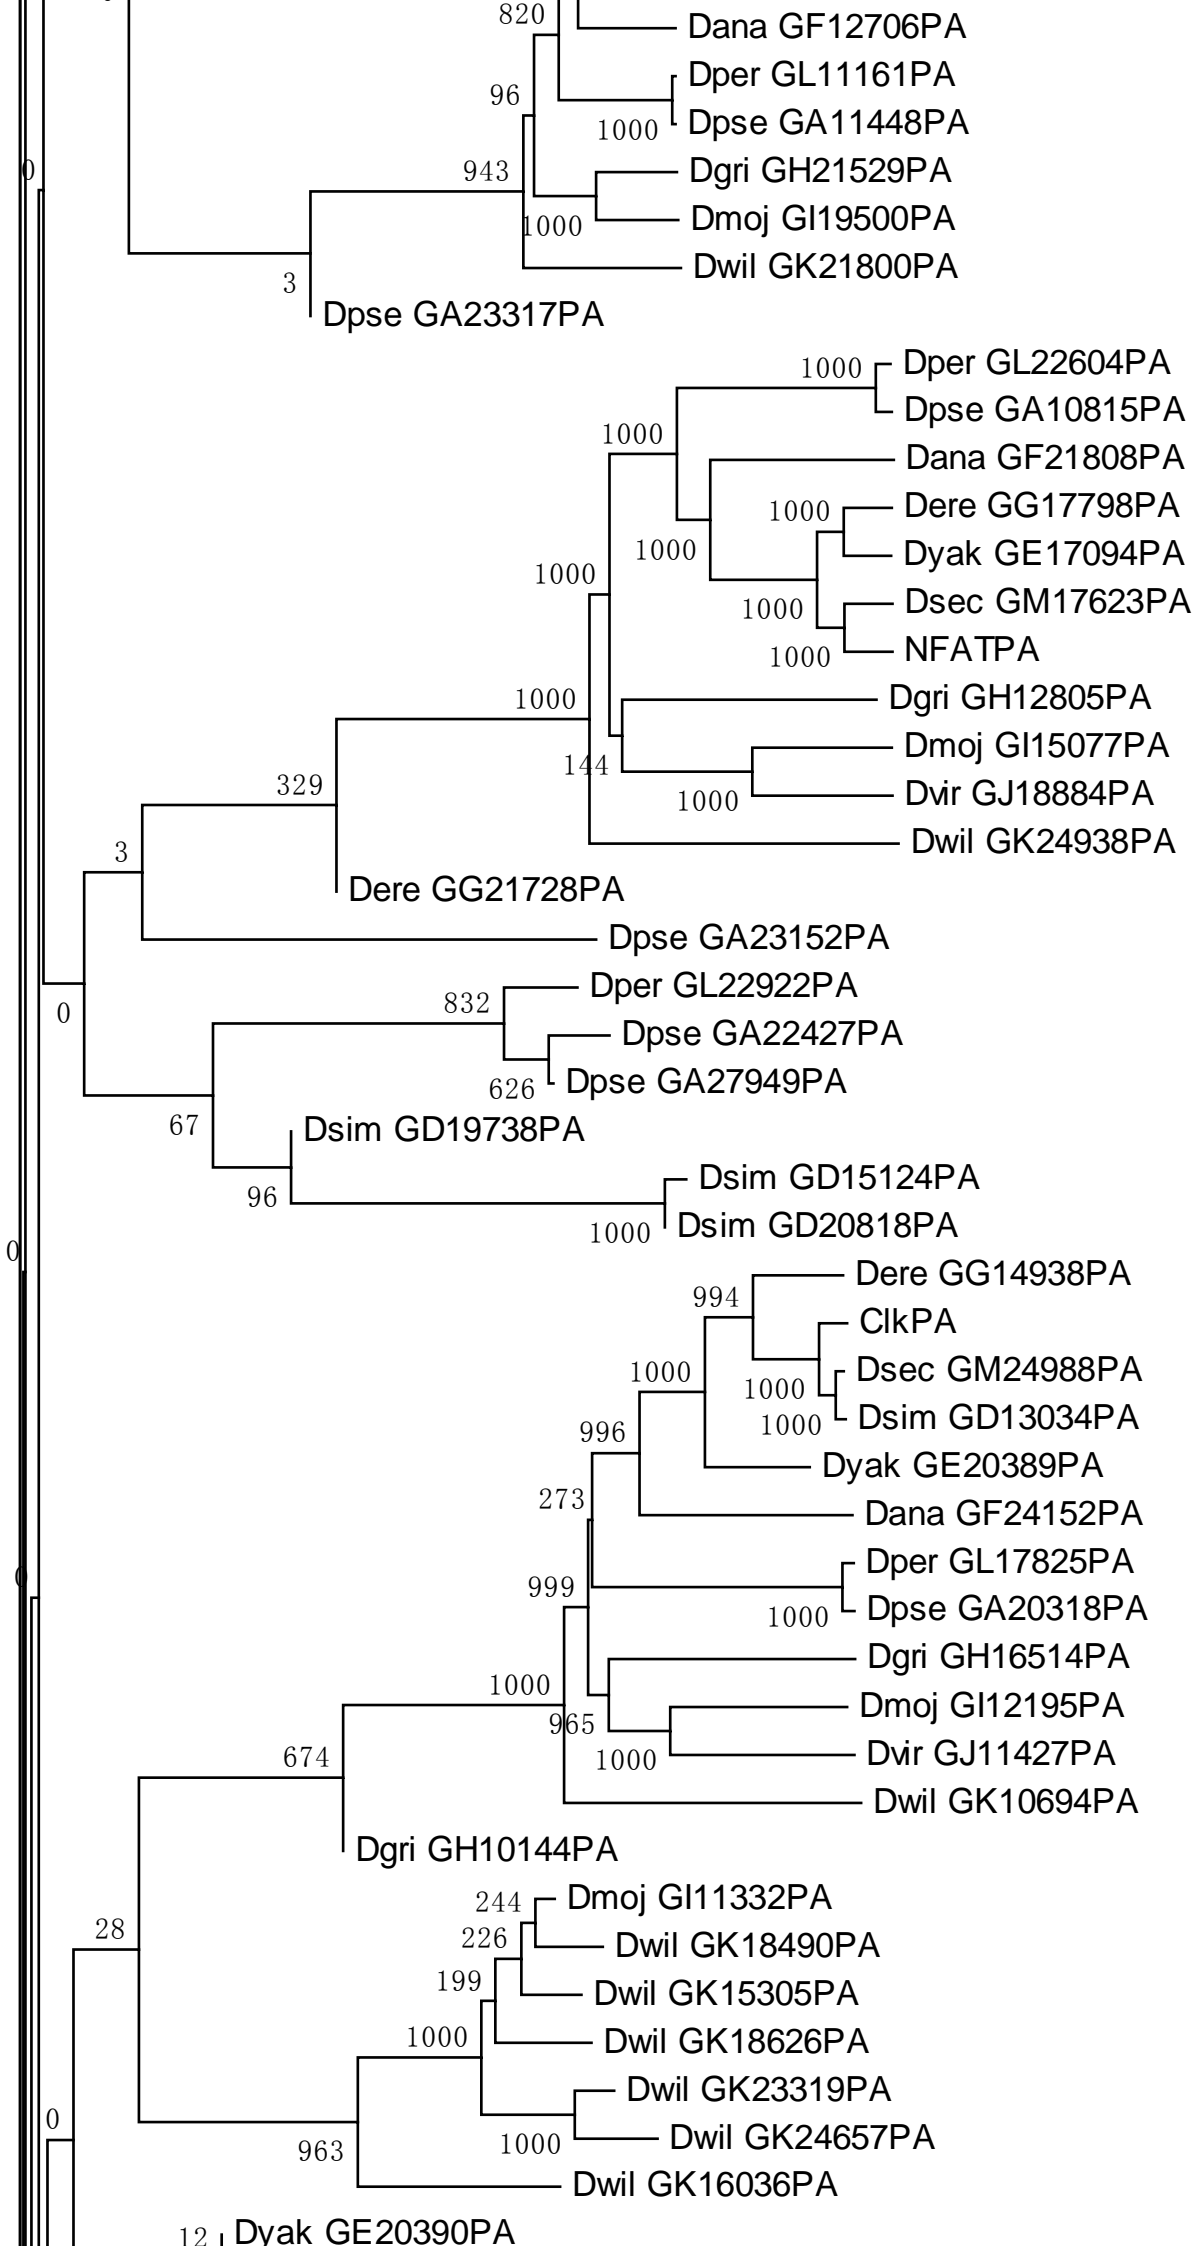

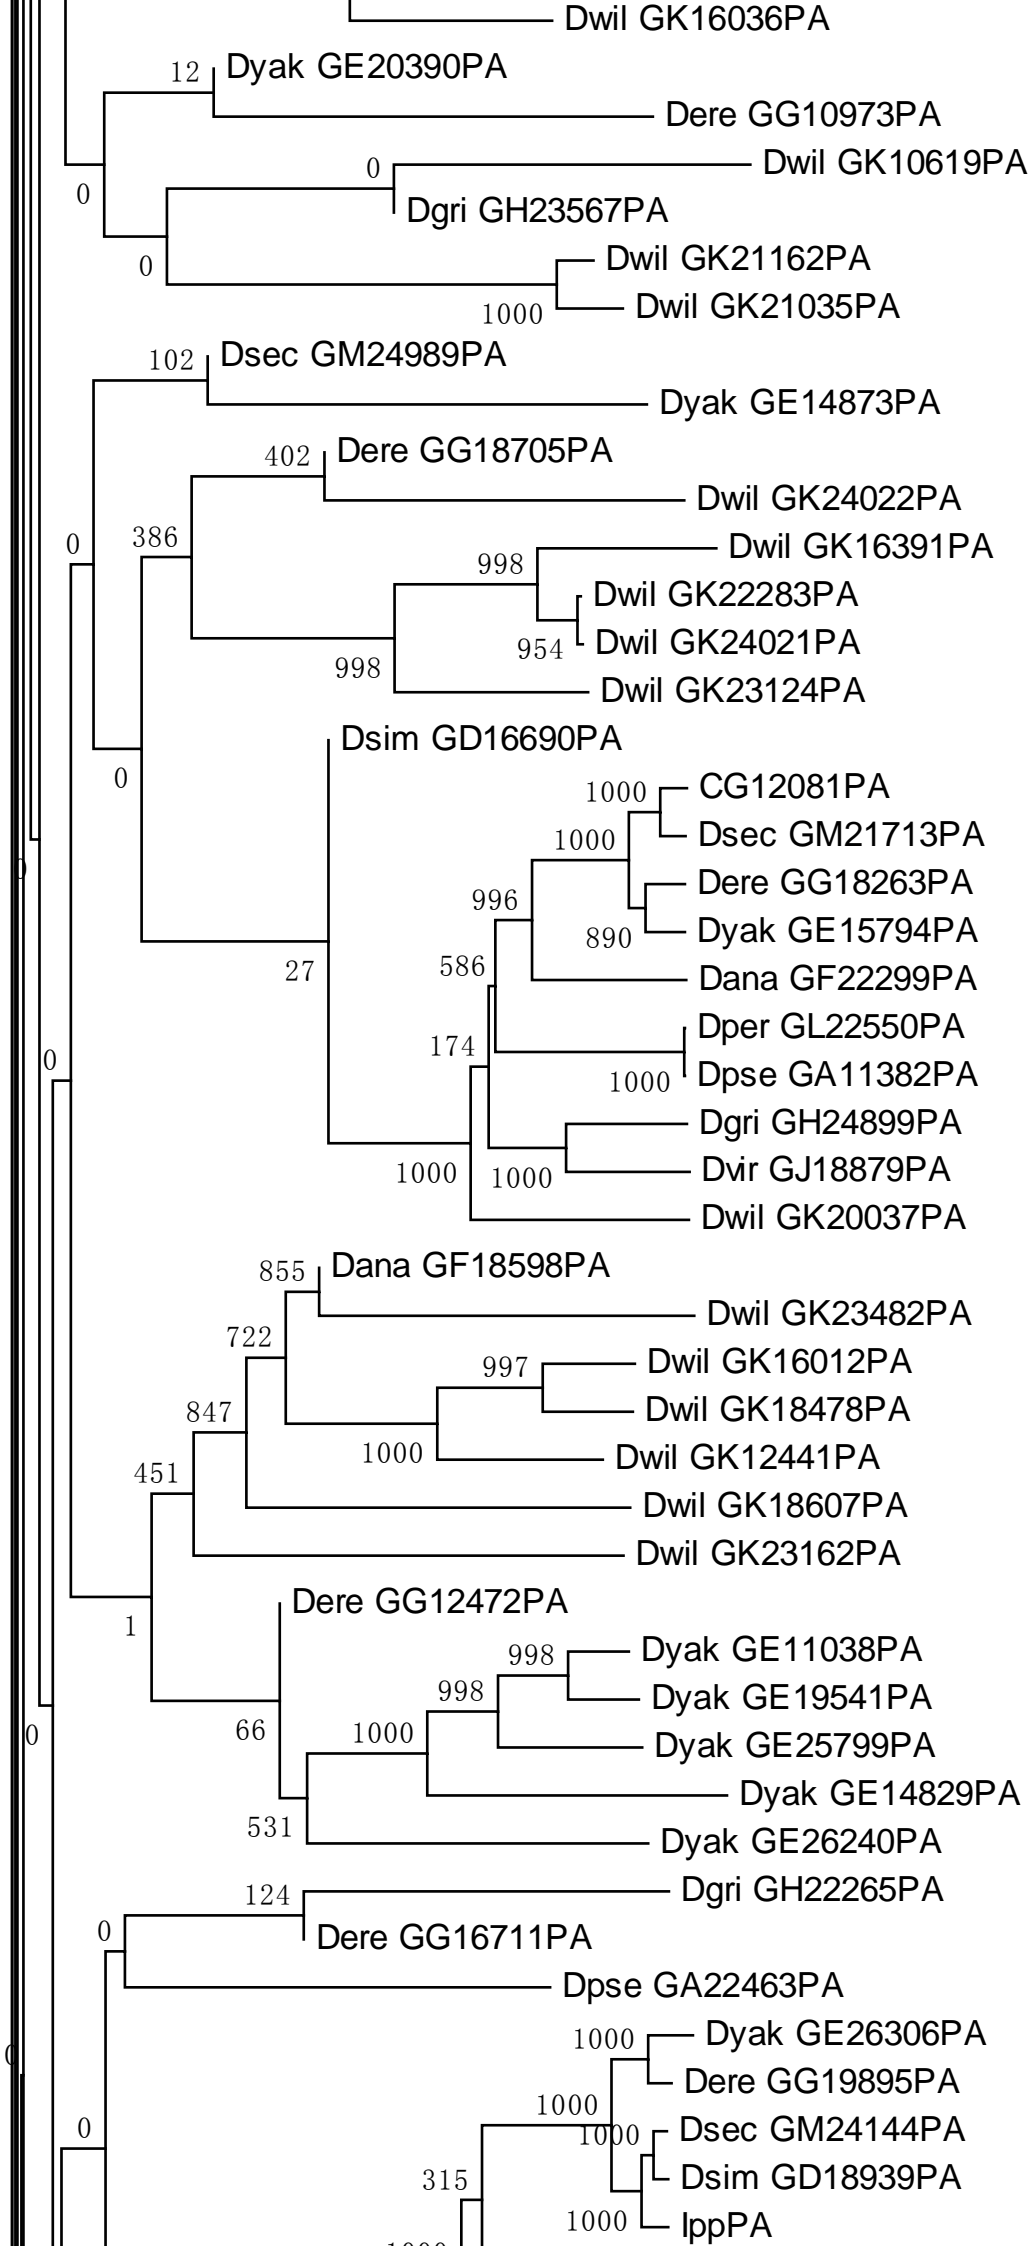

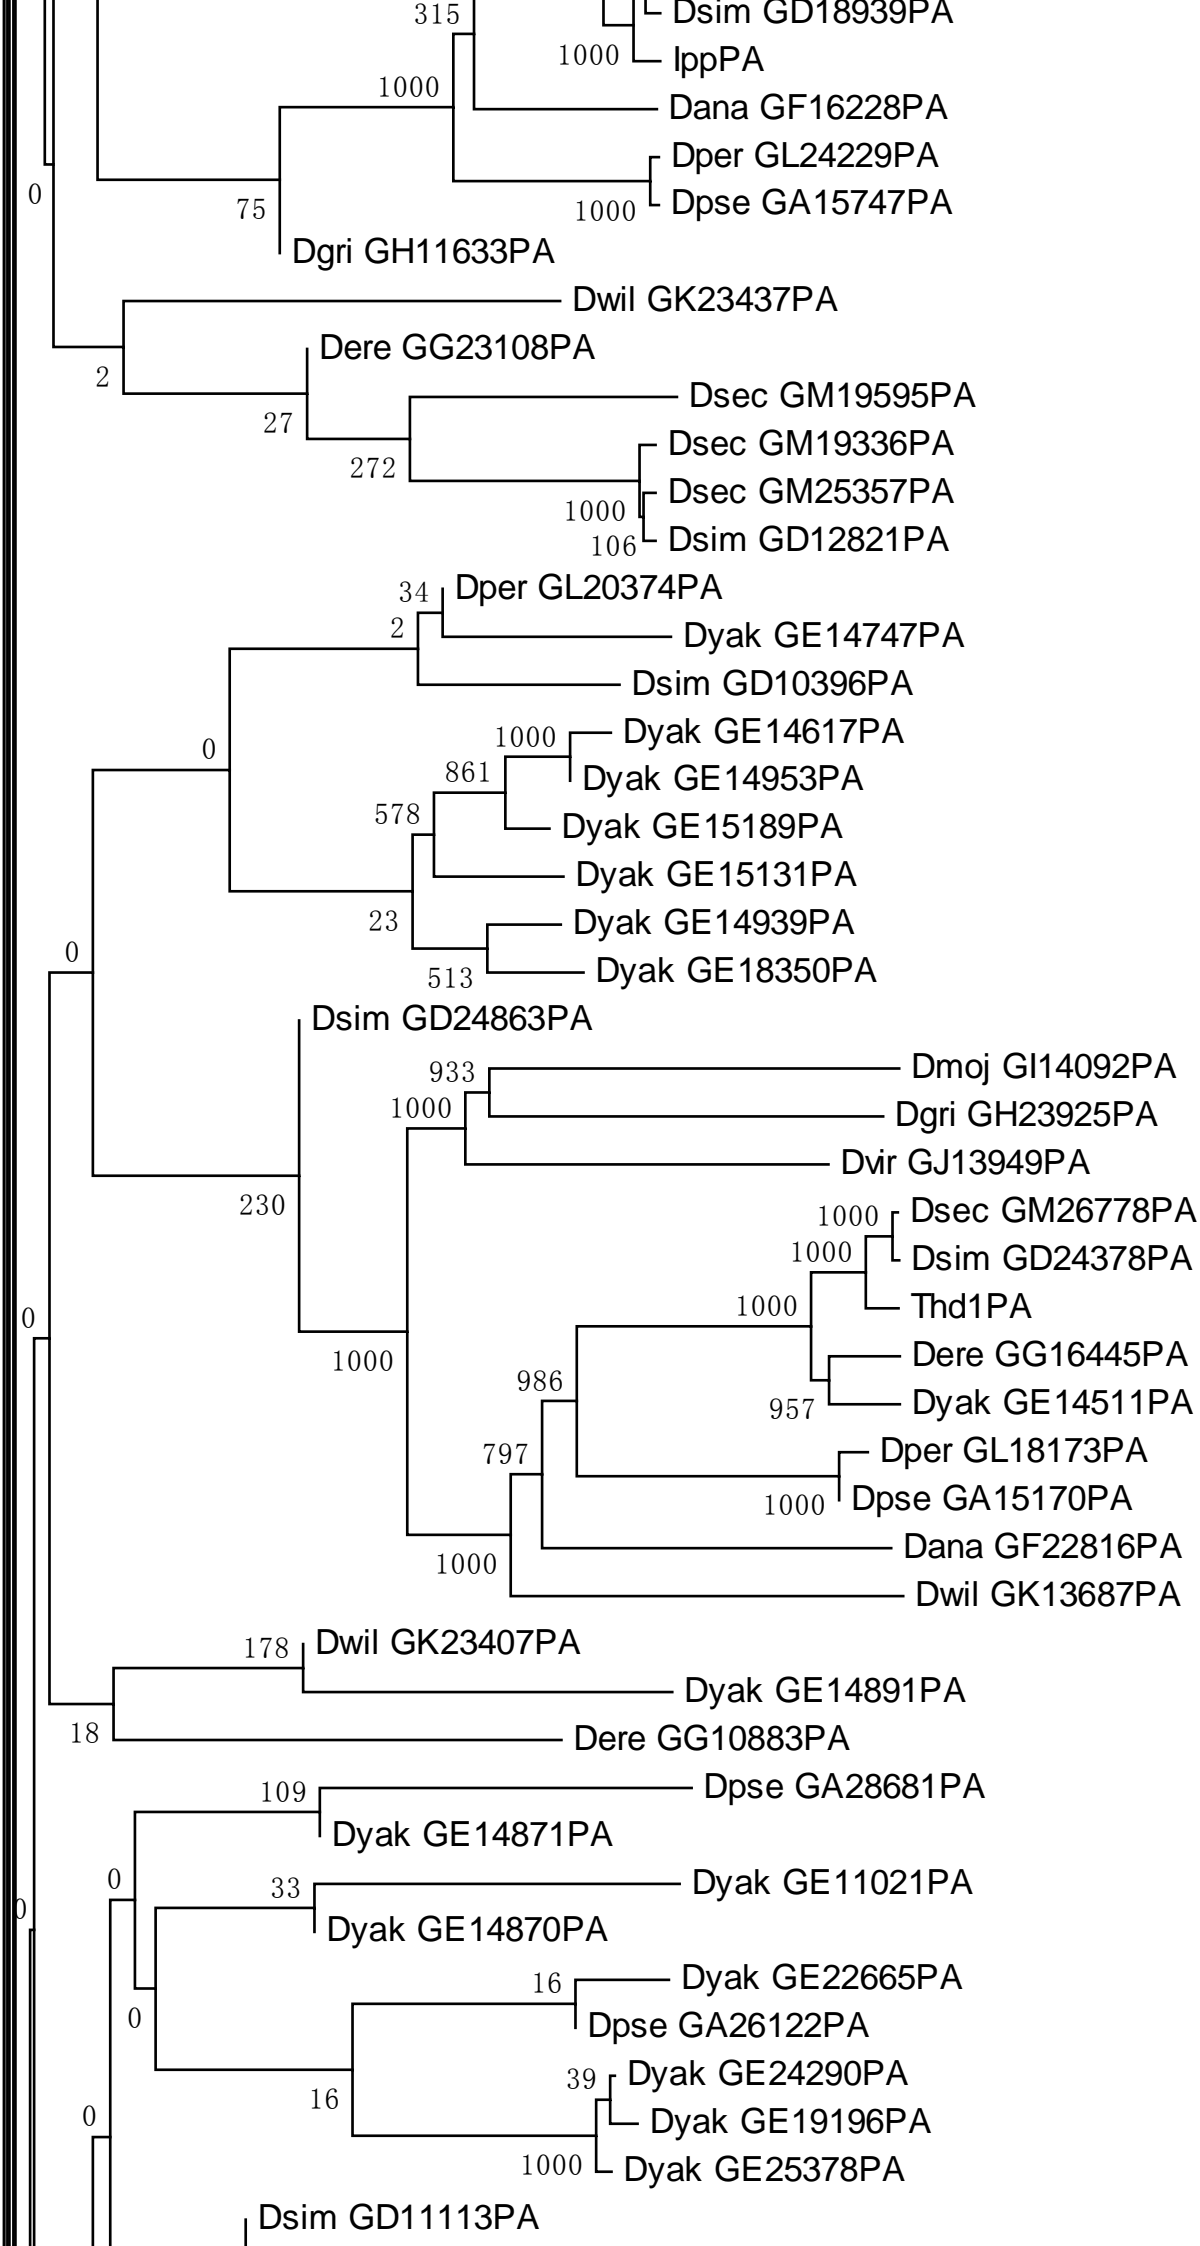

1000 Dyak GE25378PA

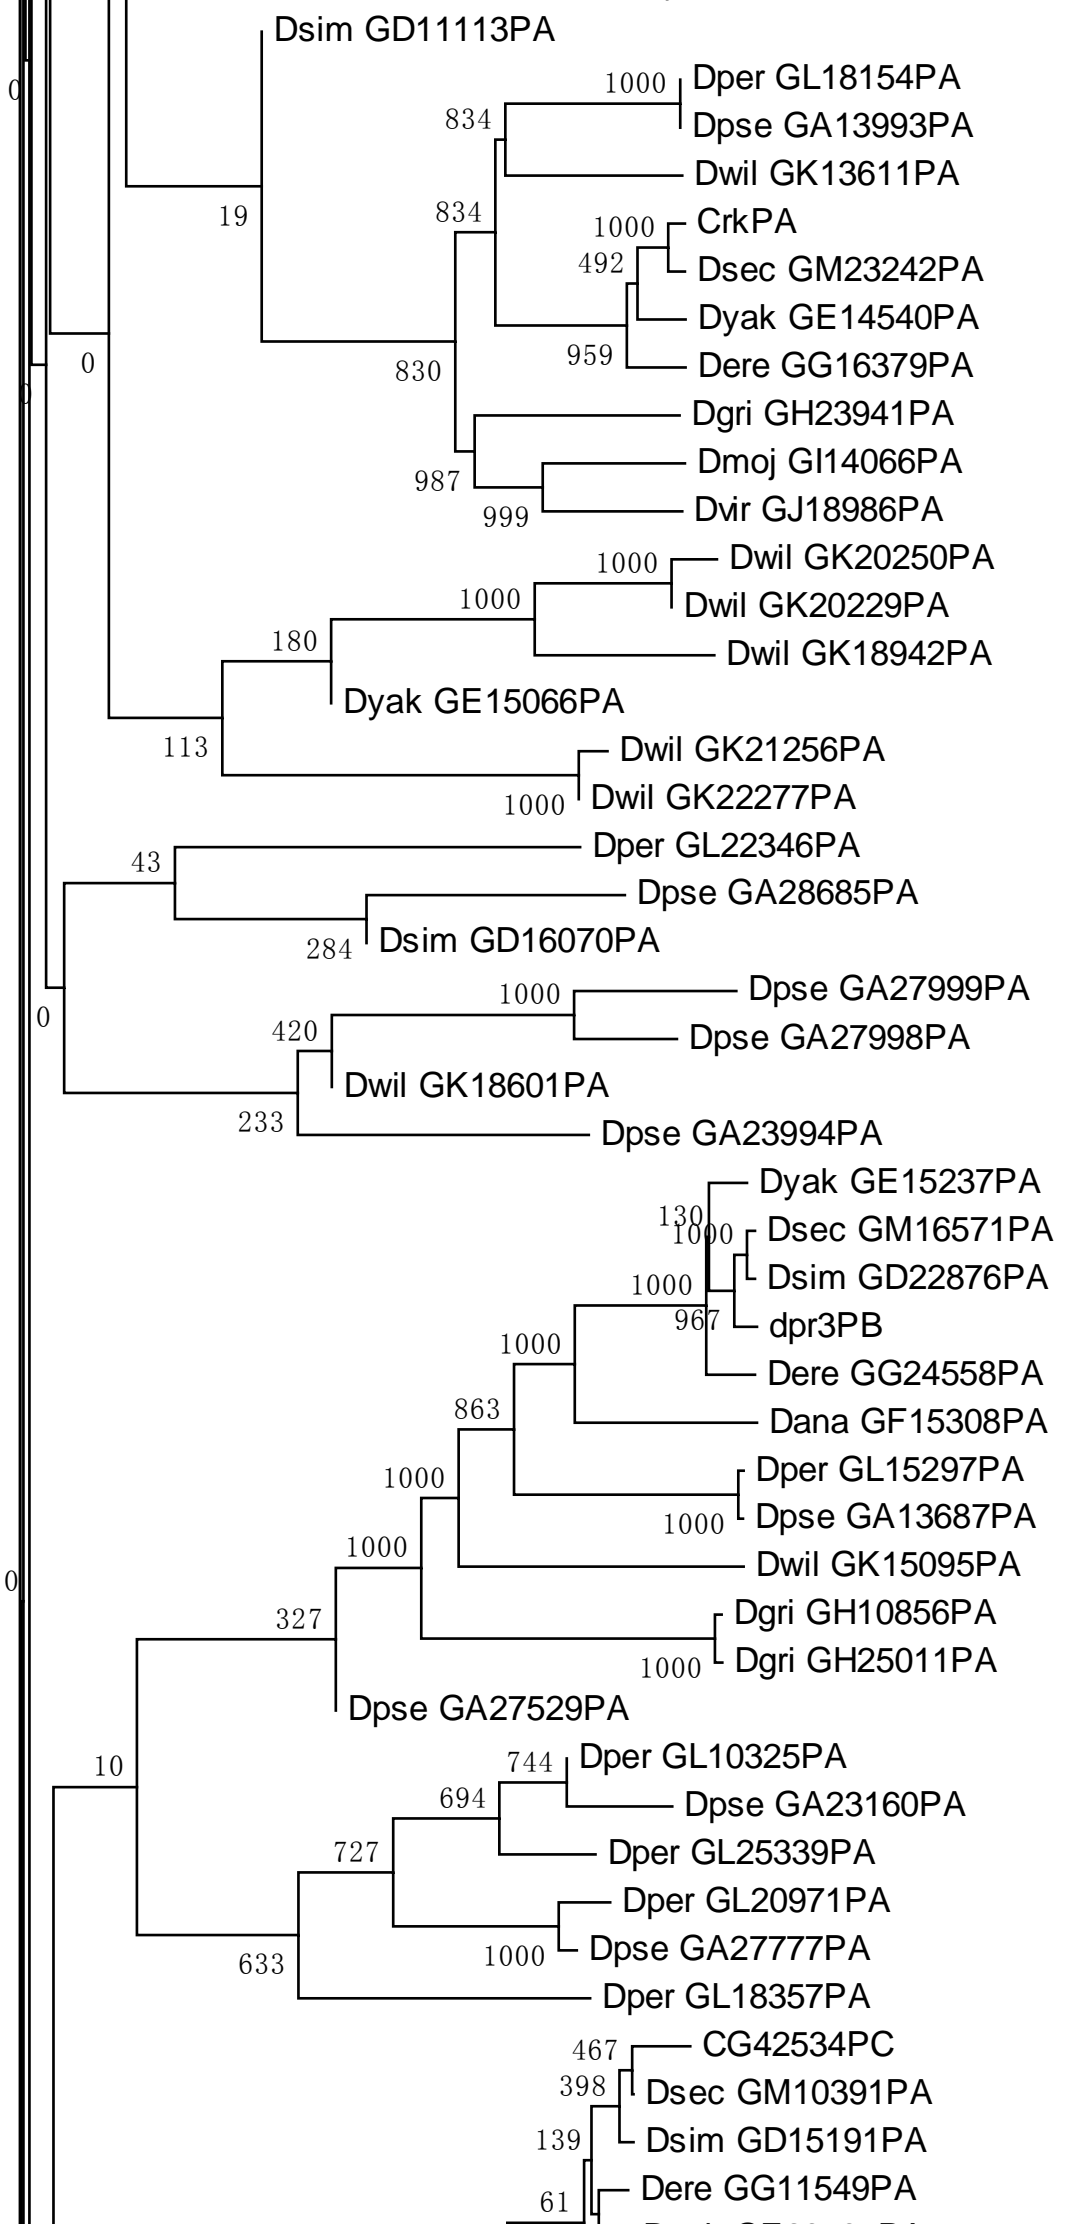

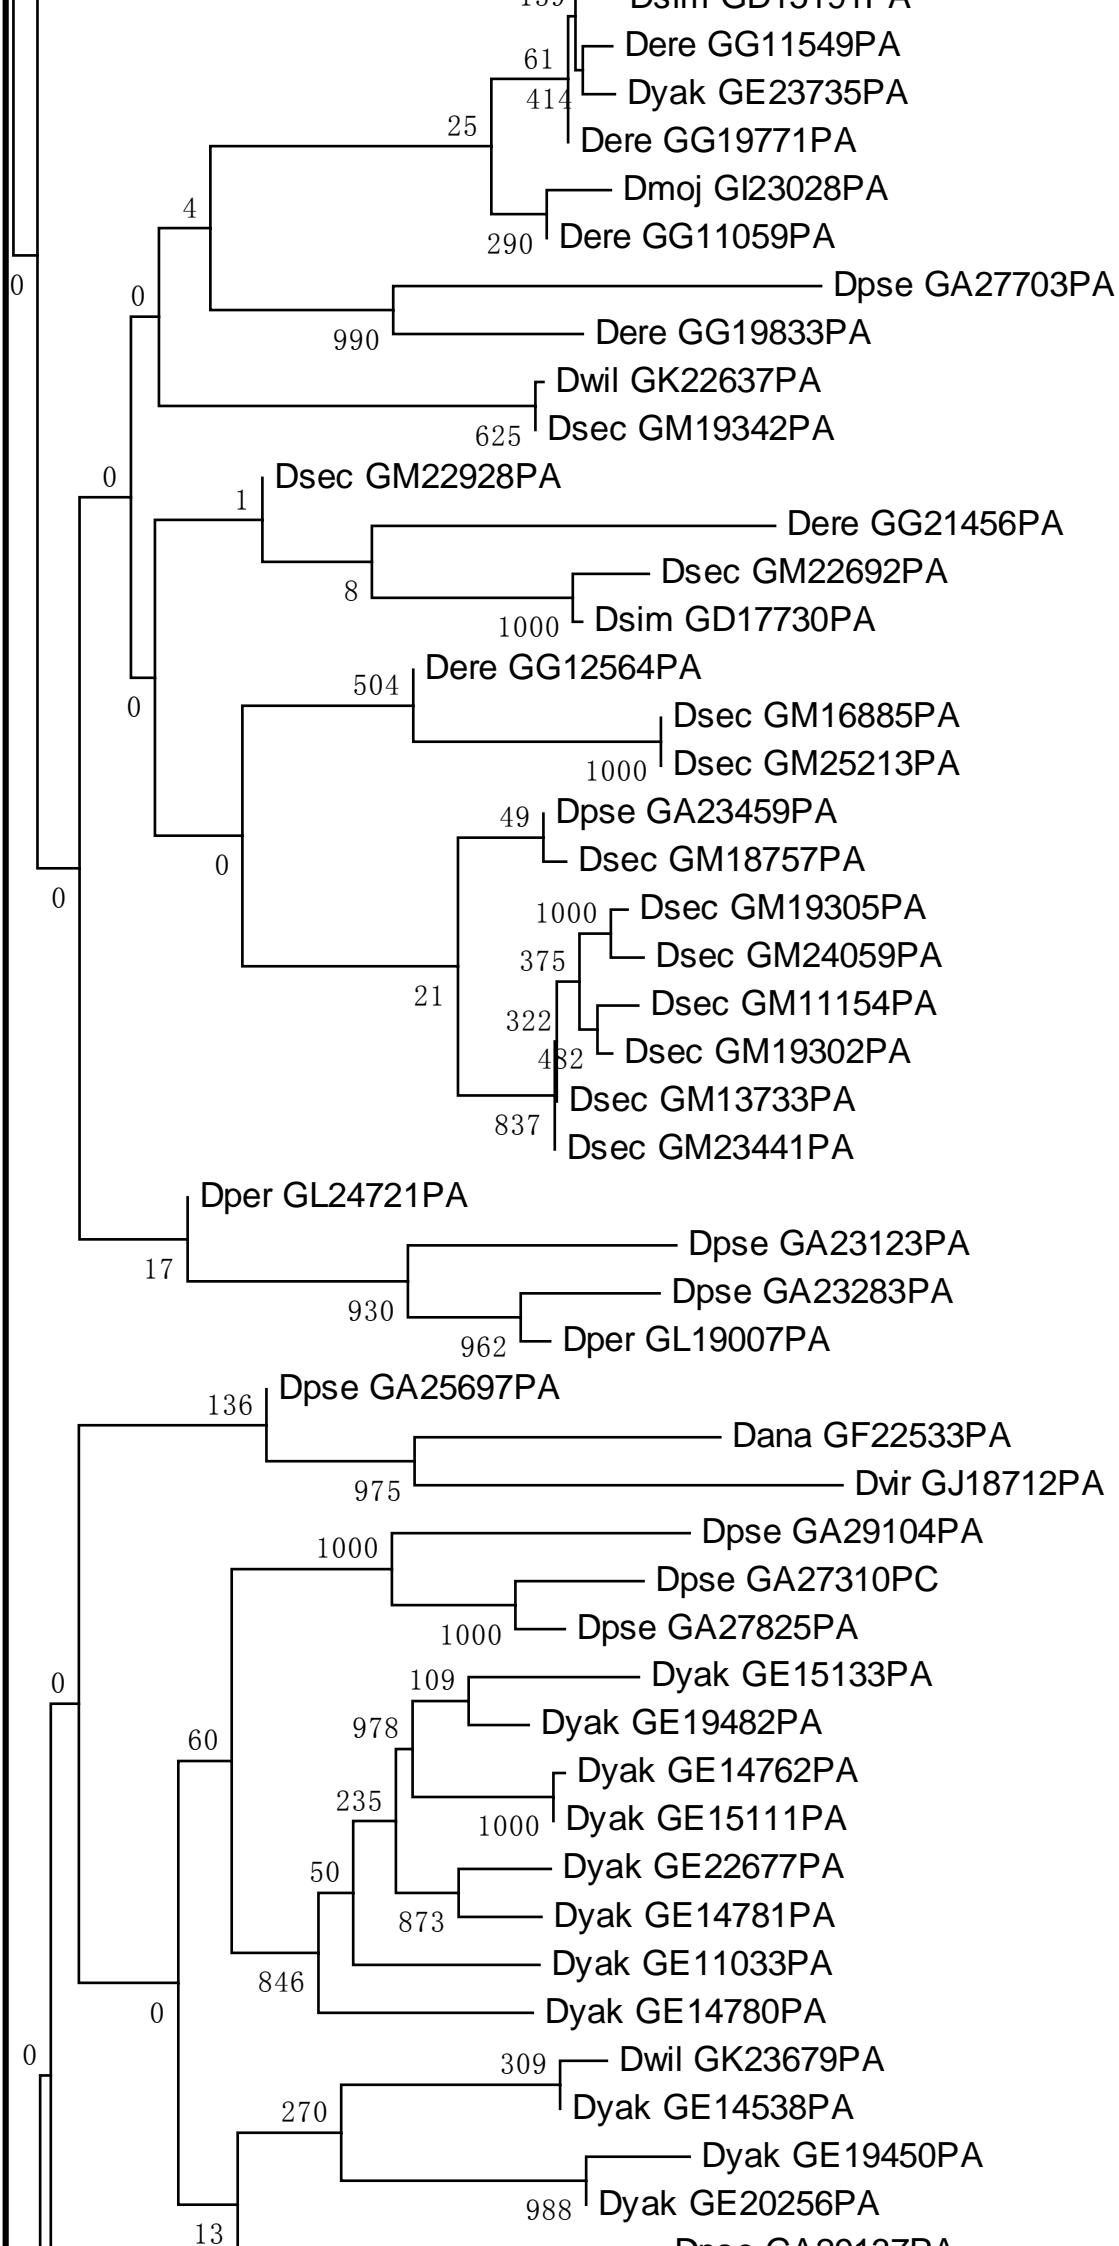

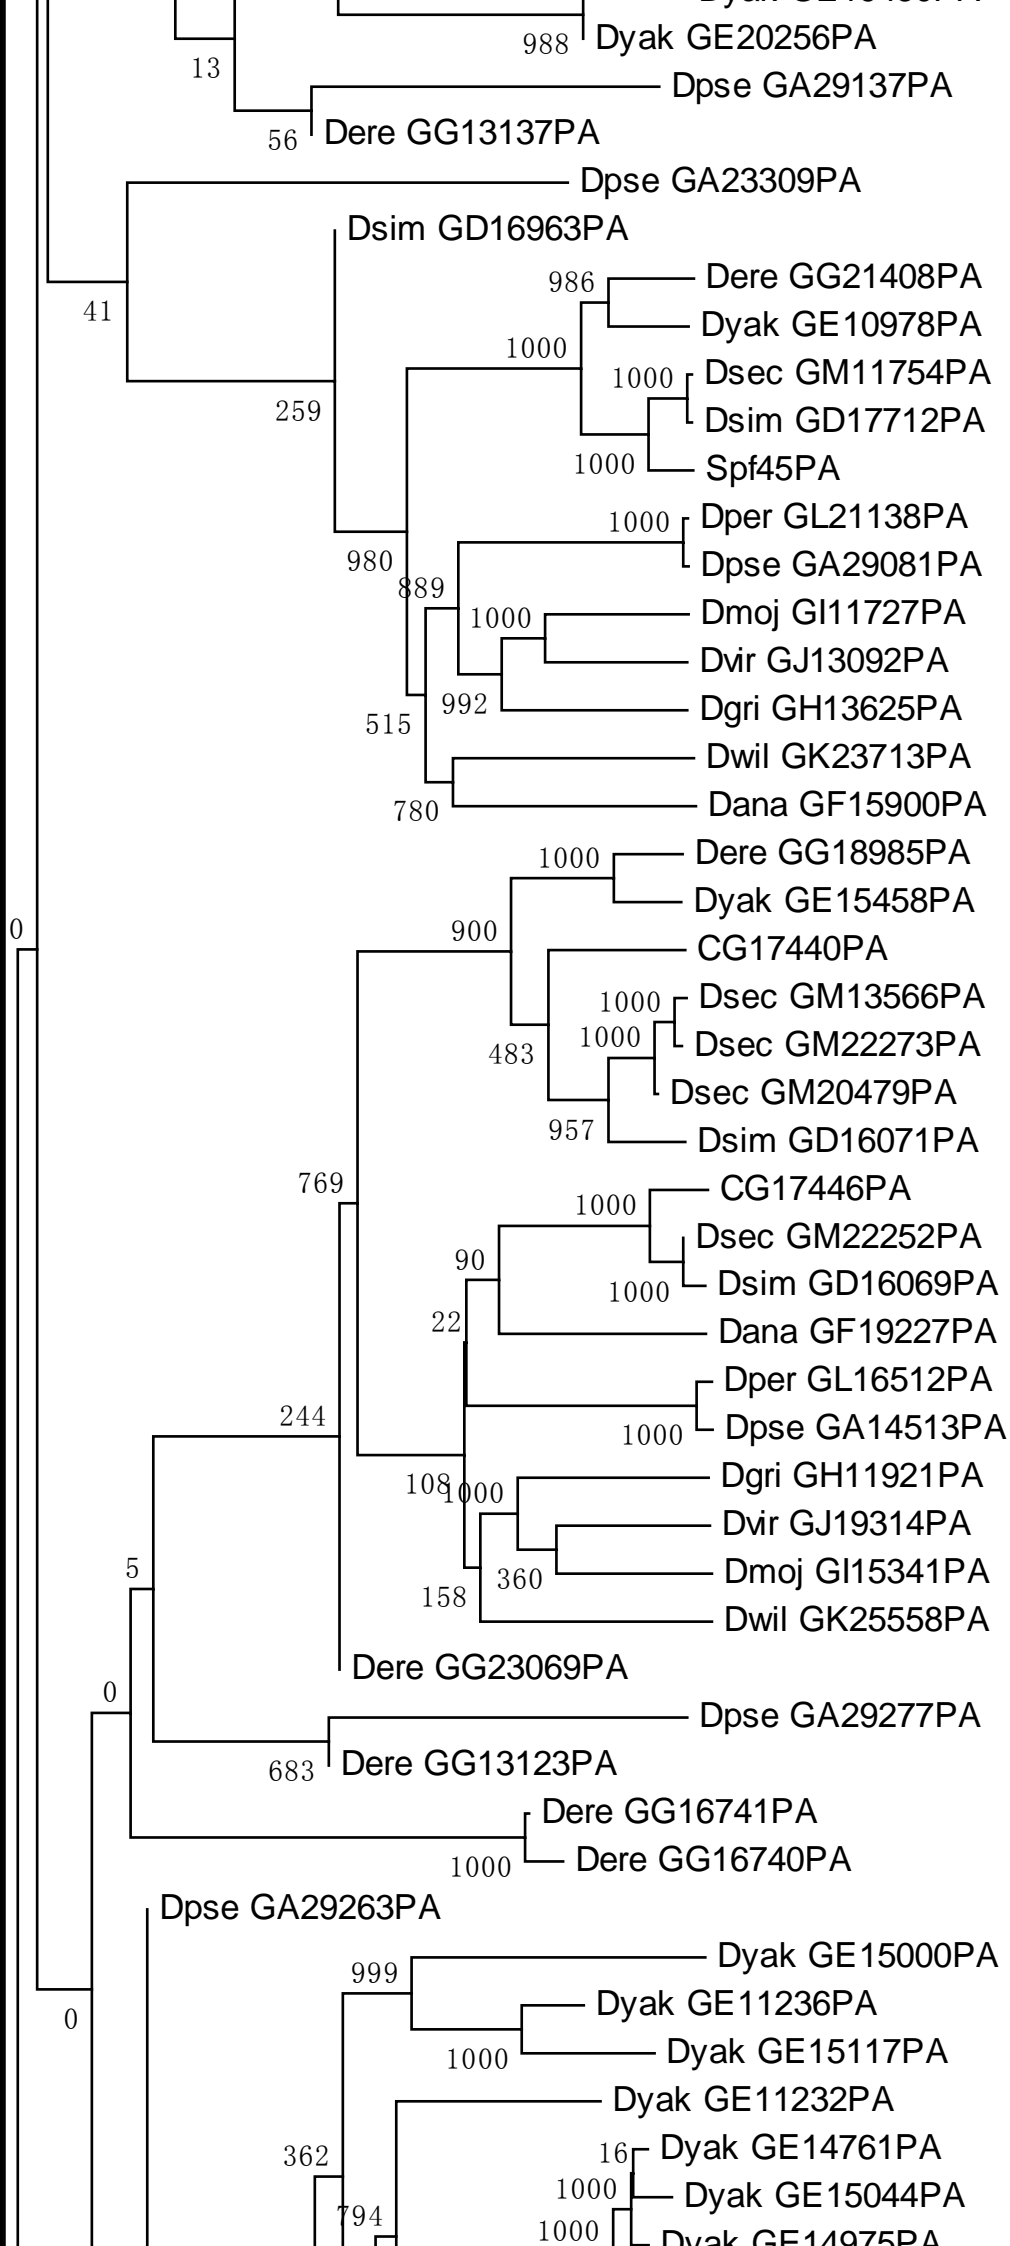

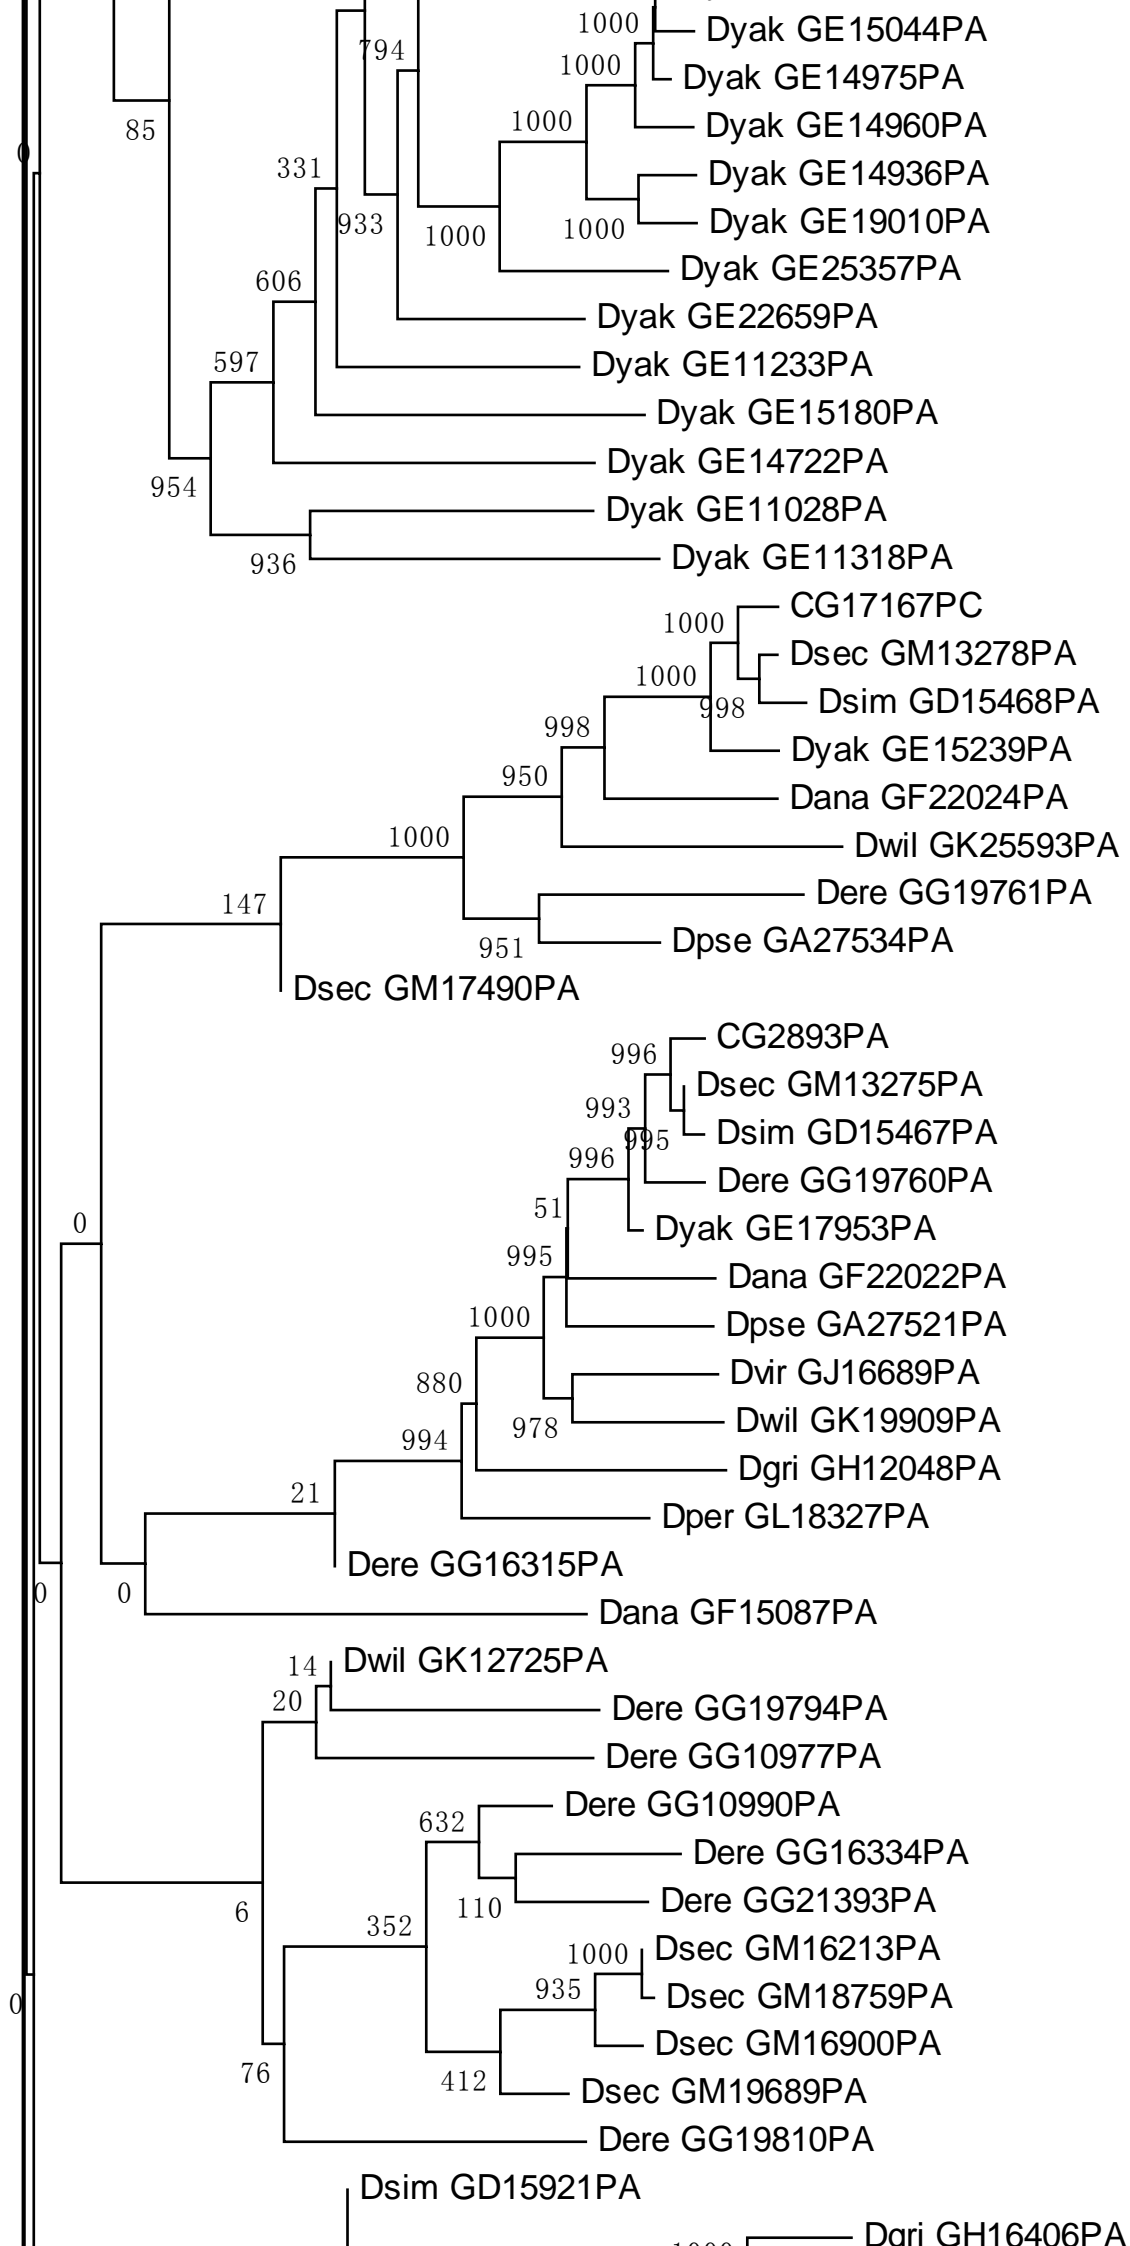





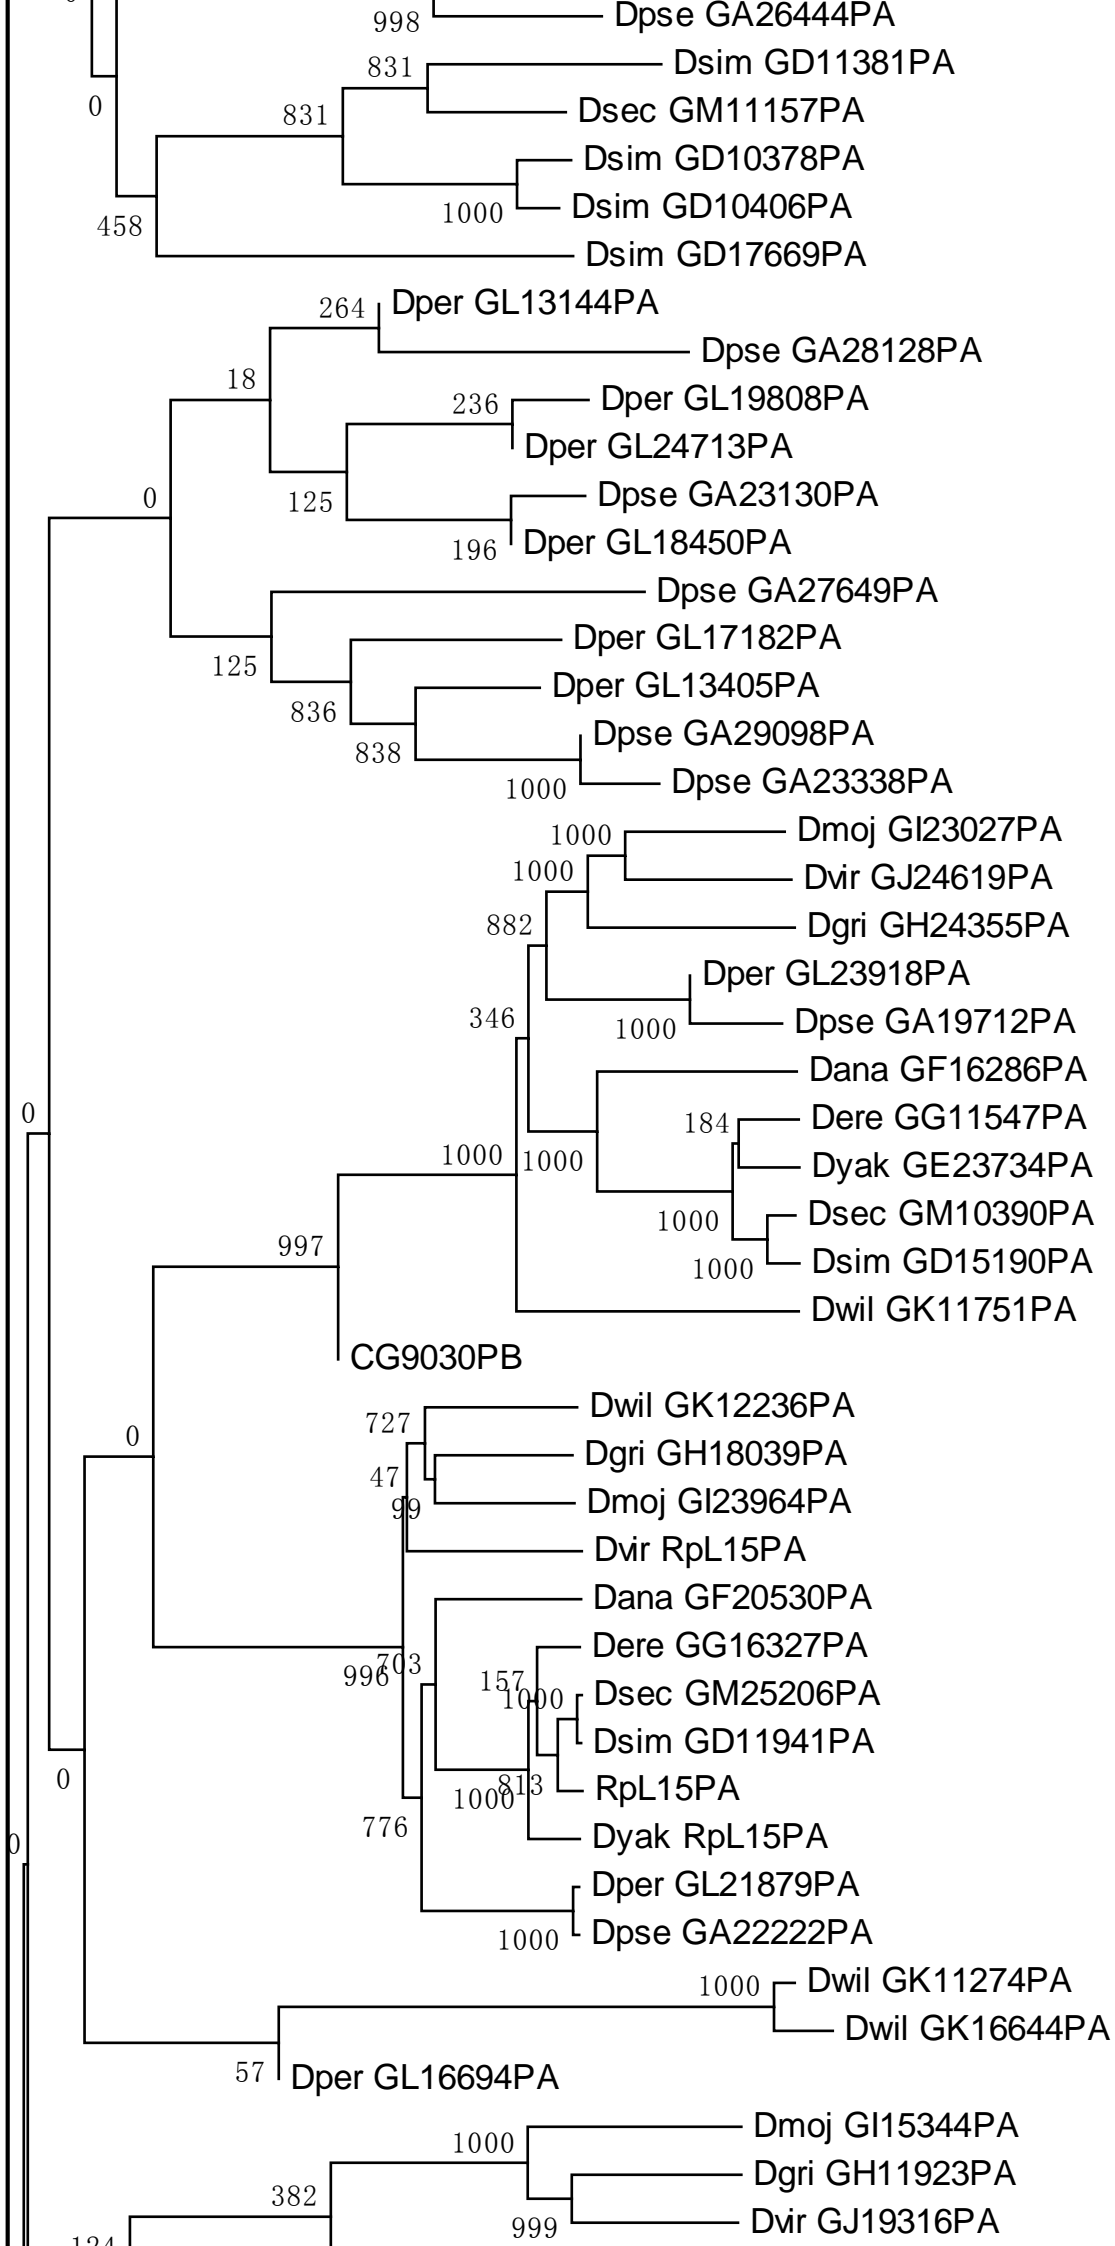

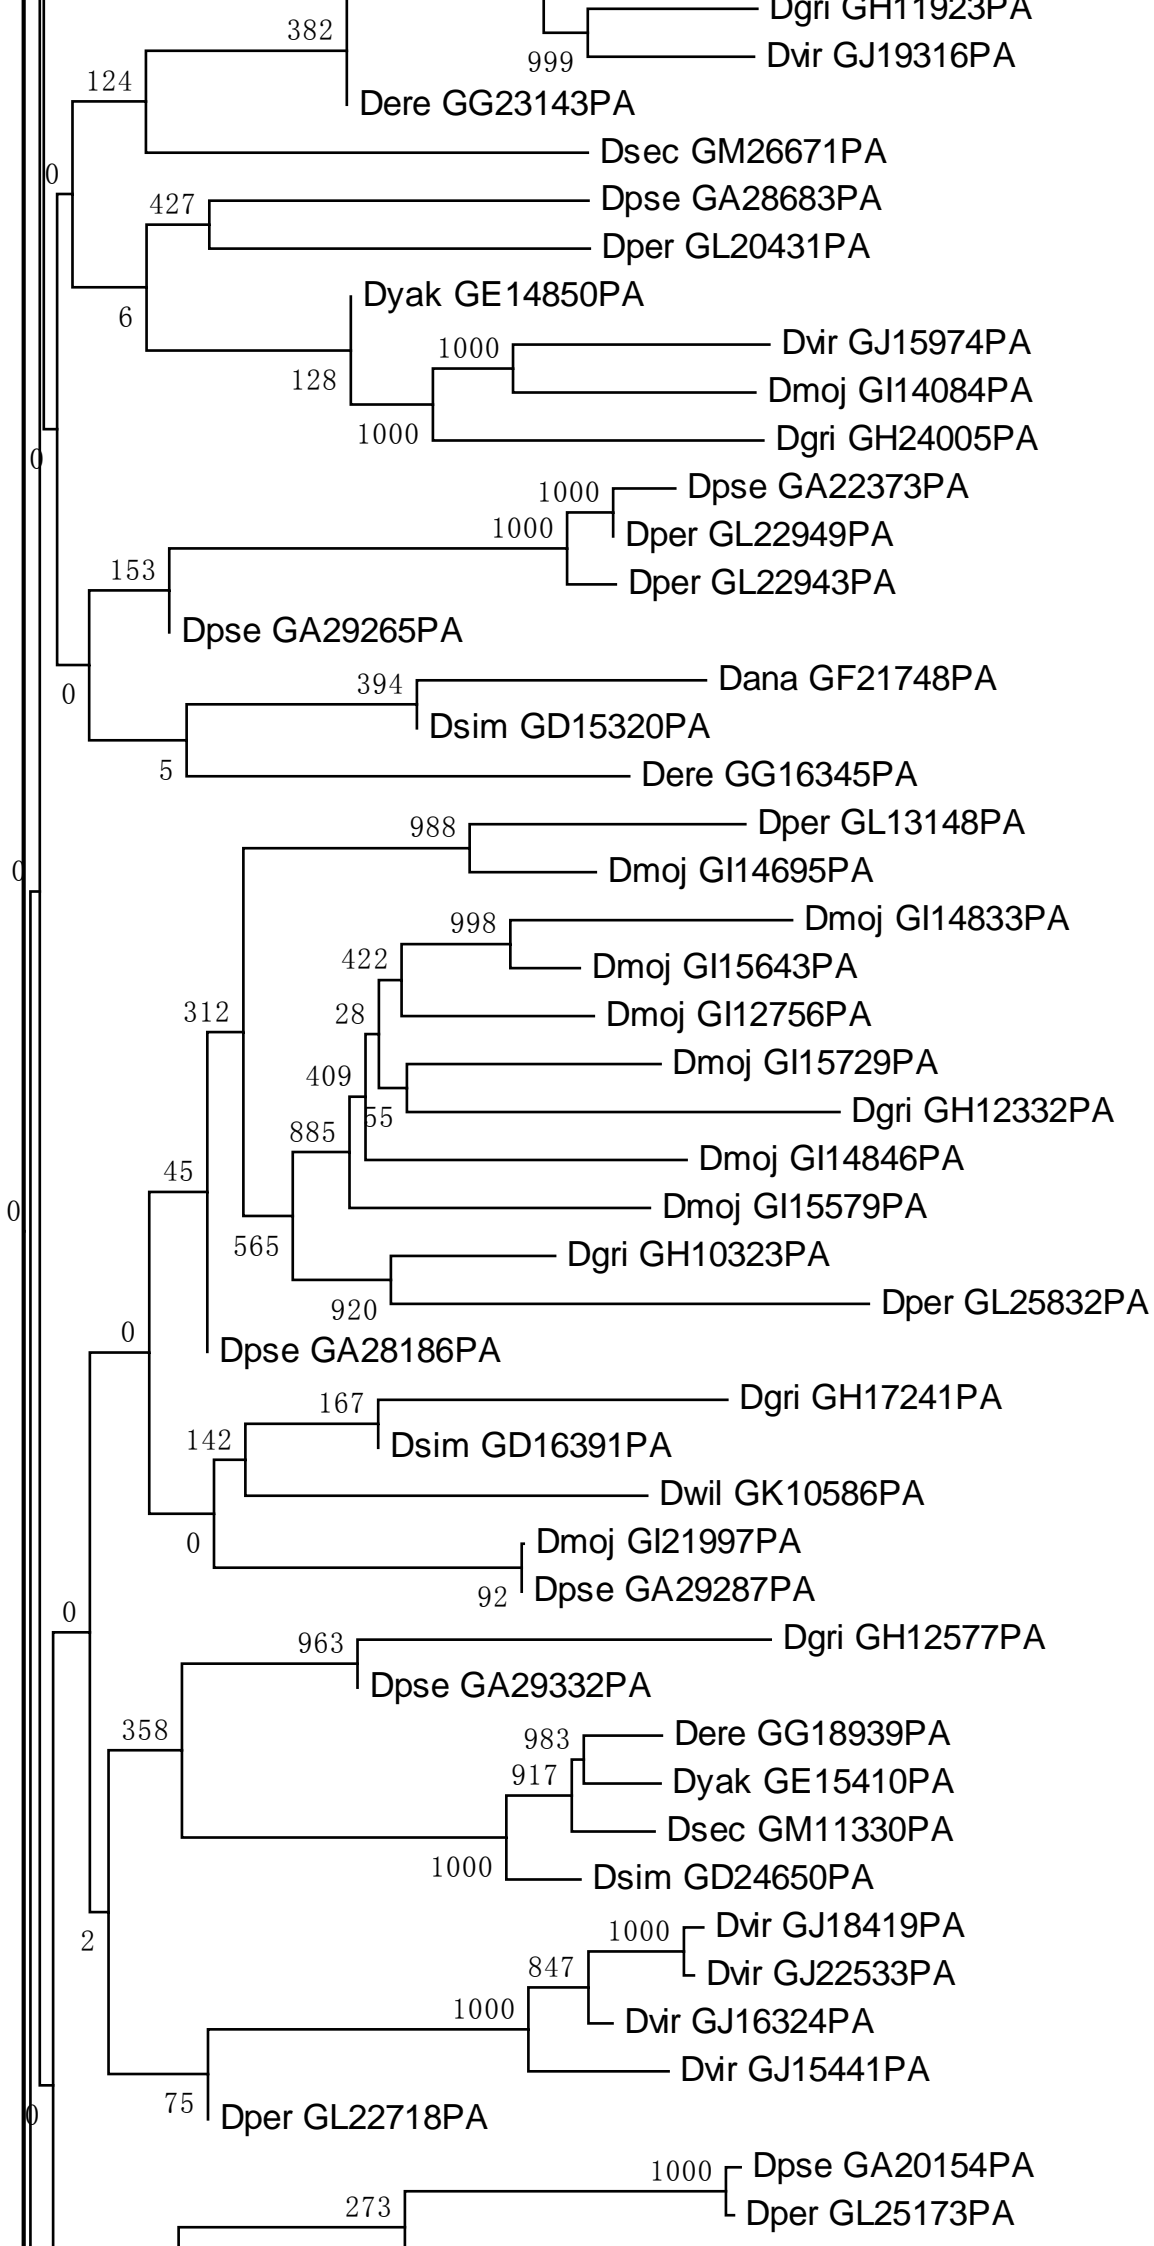

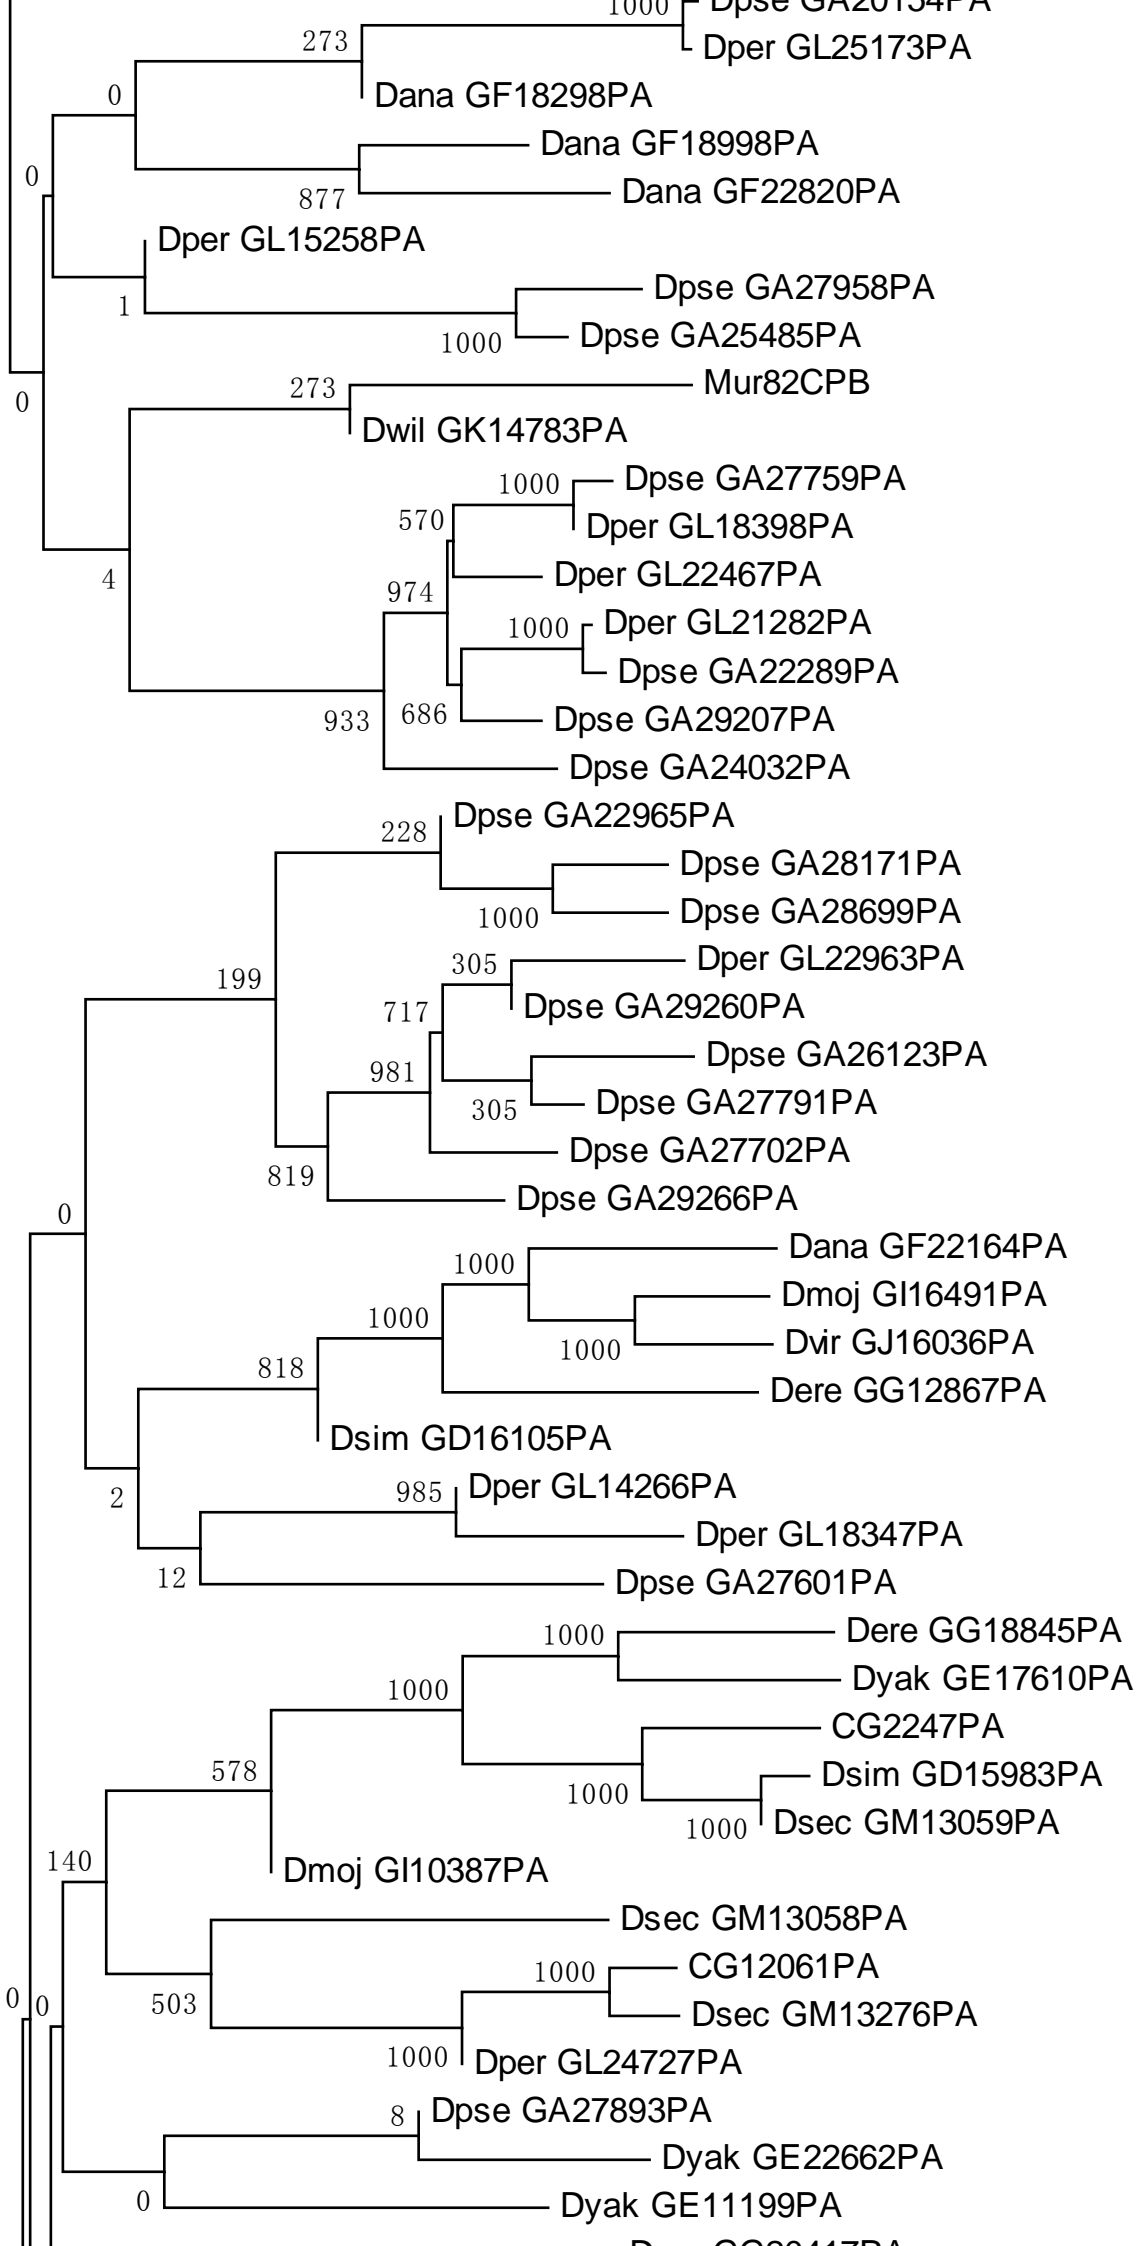

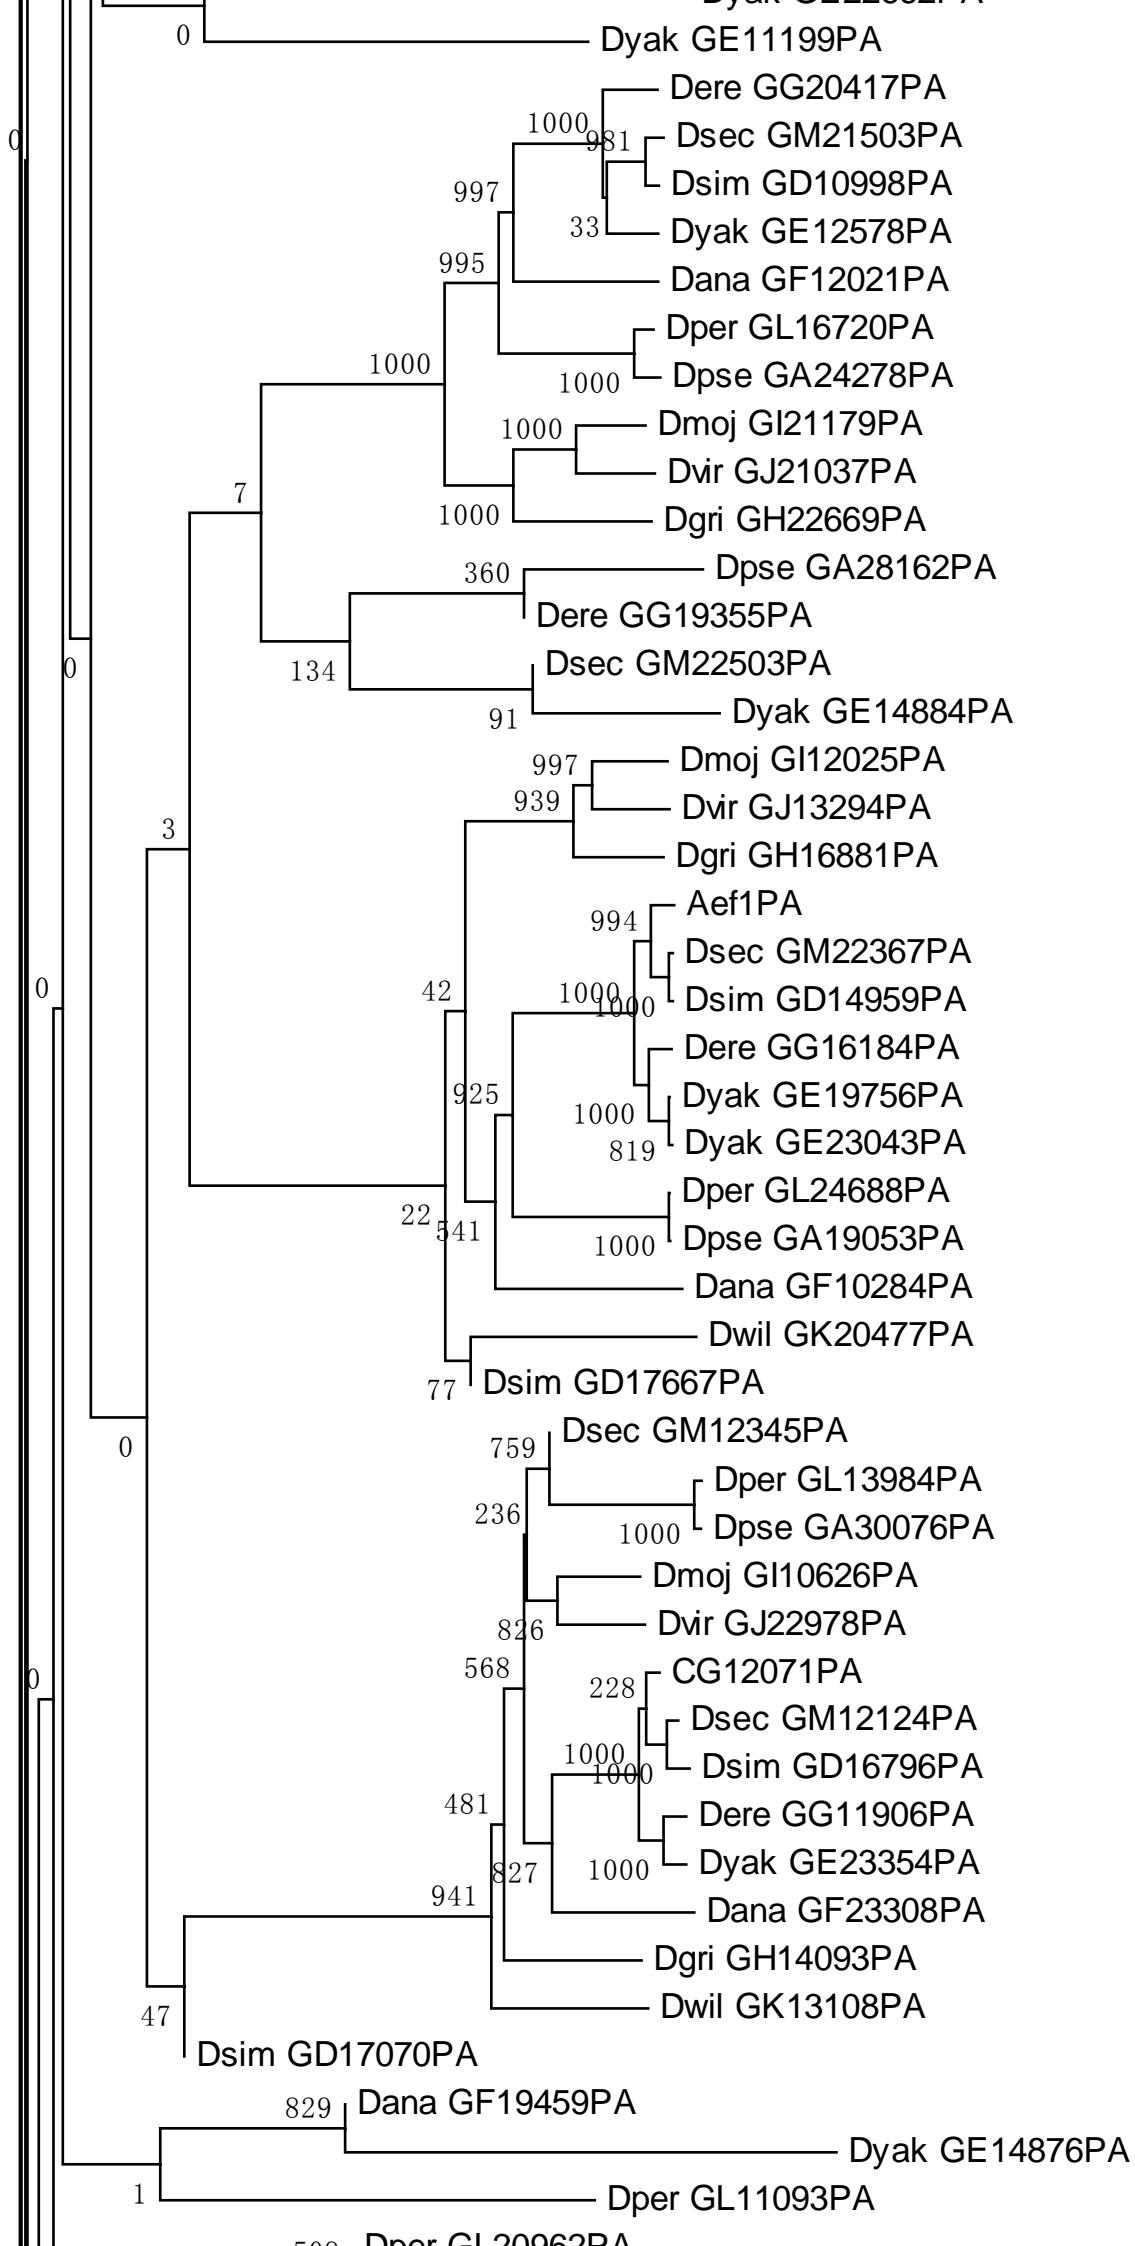

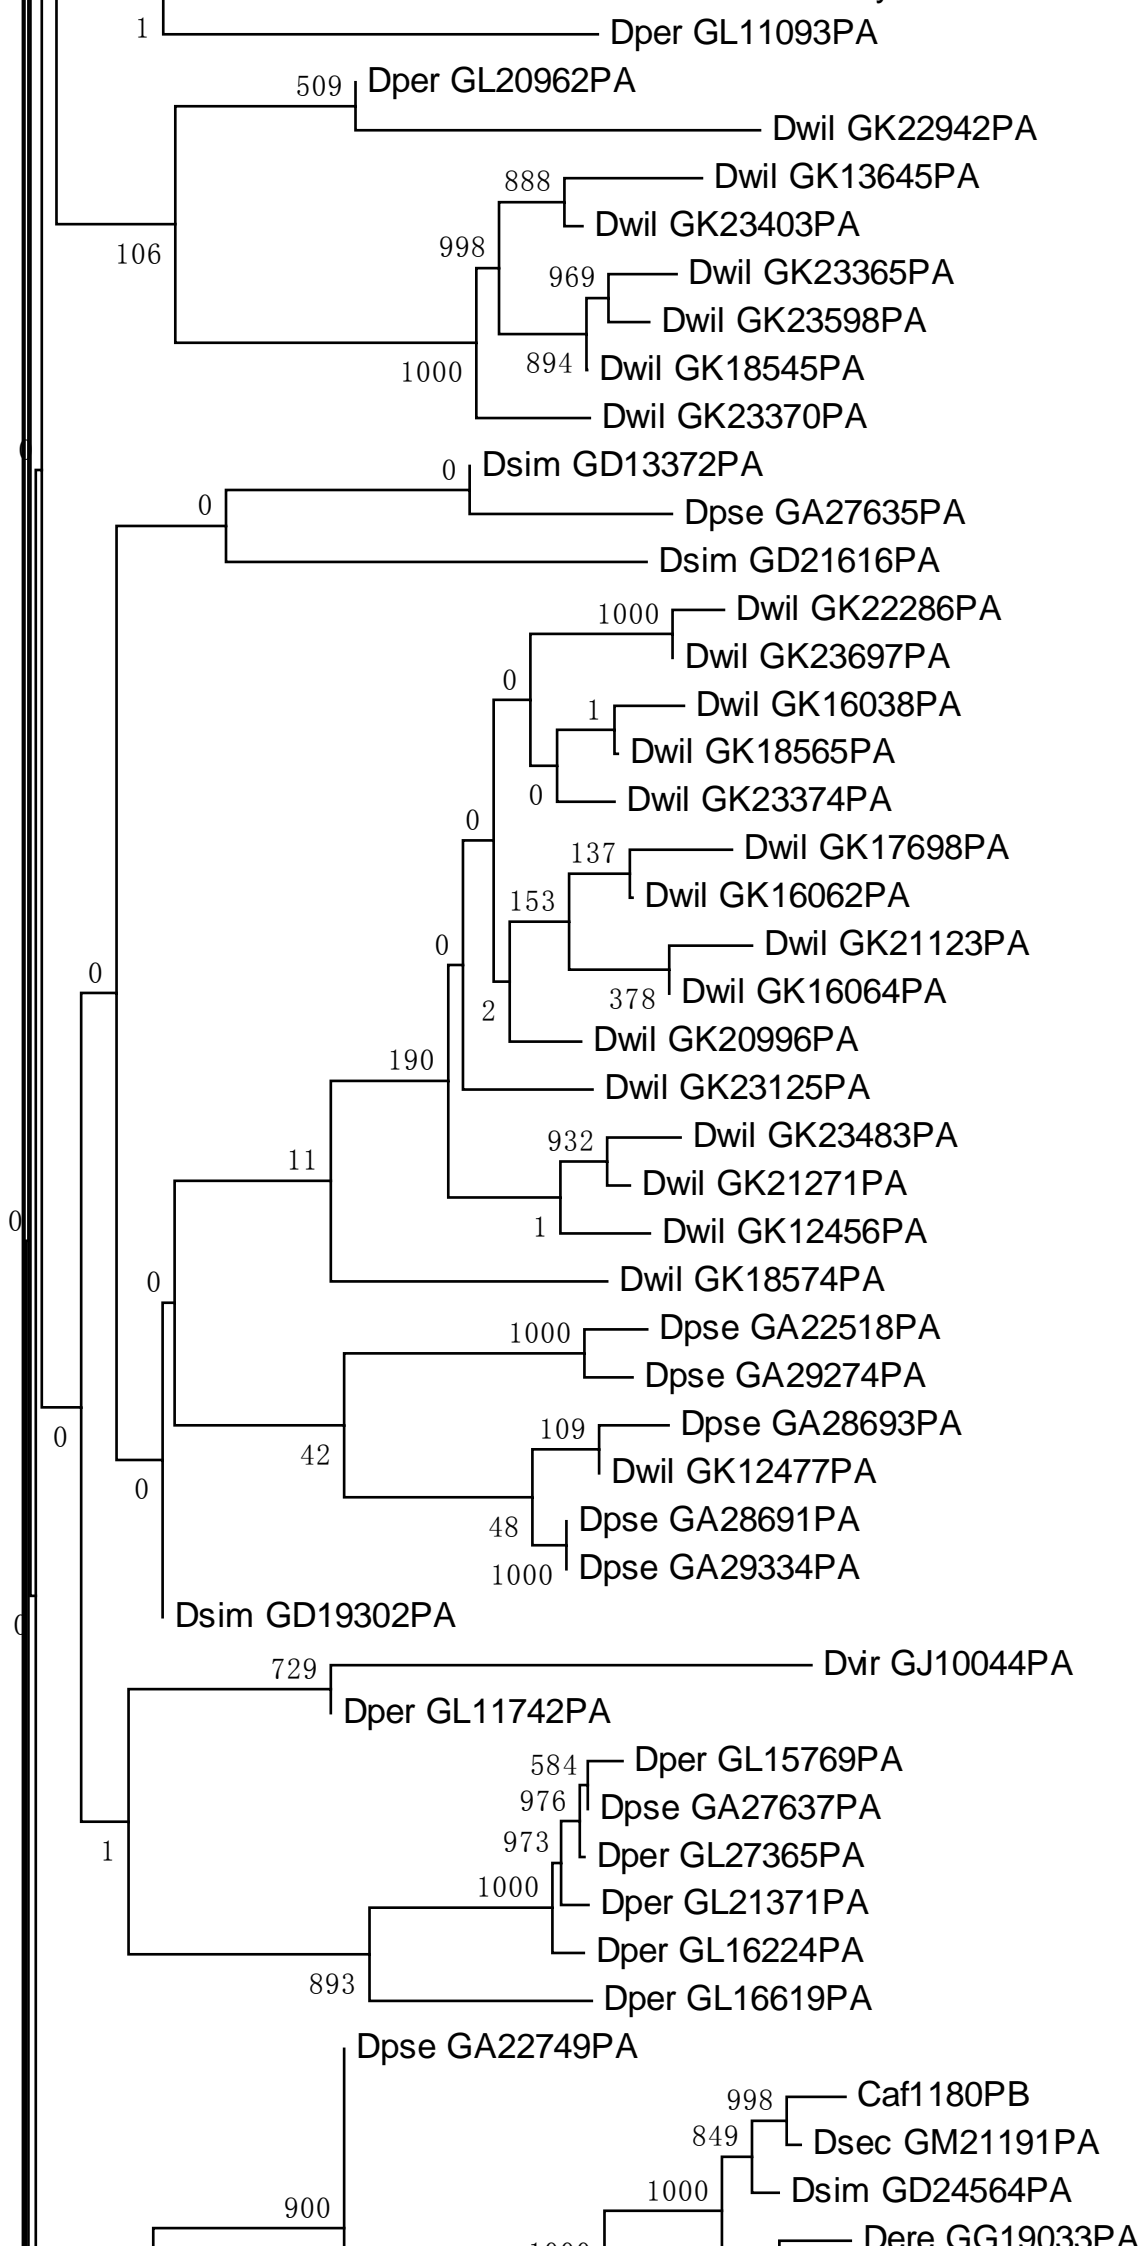

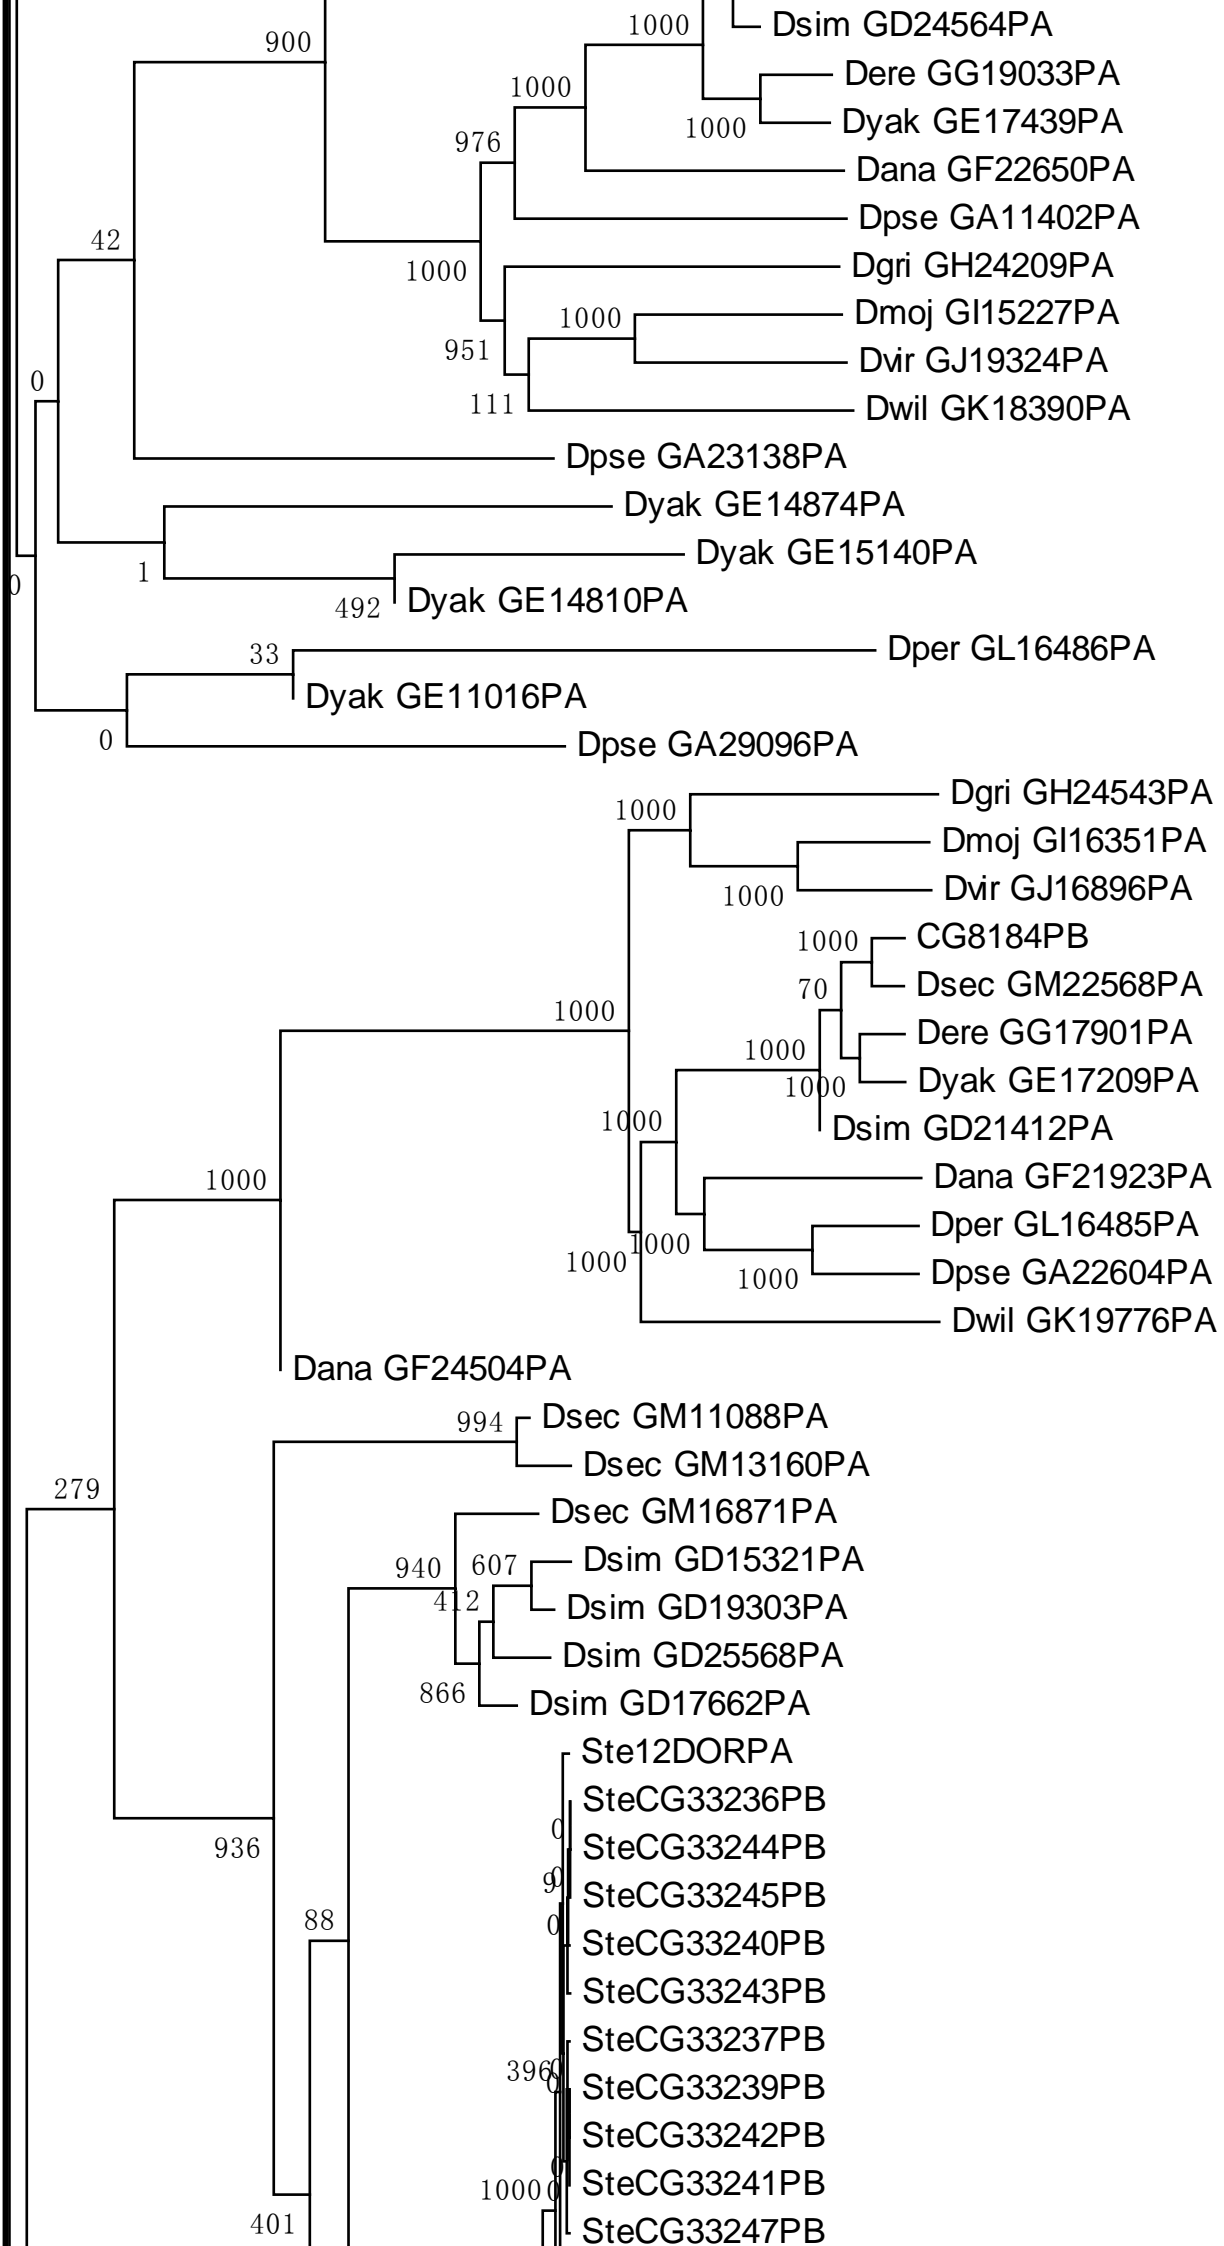

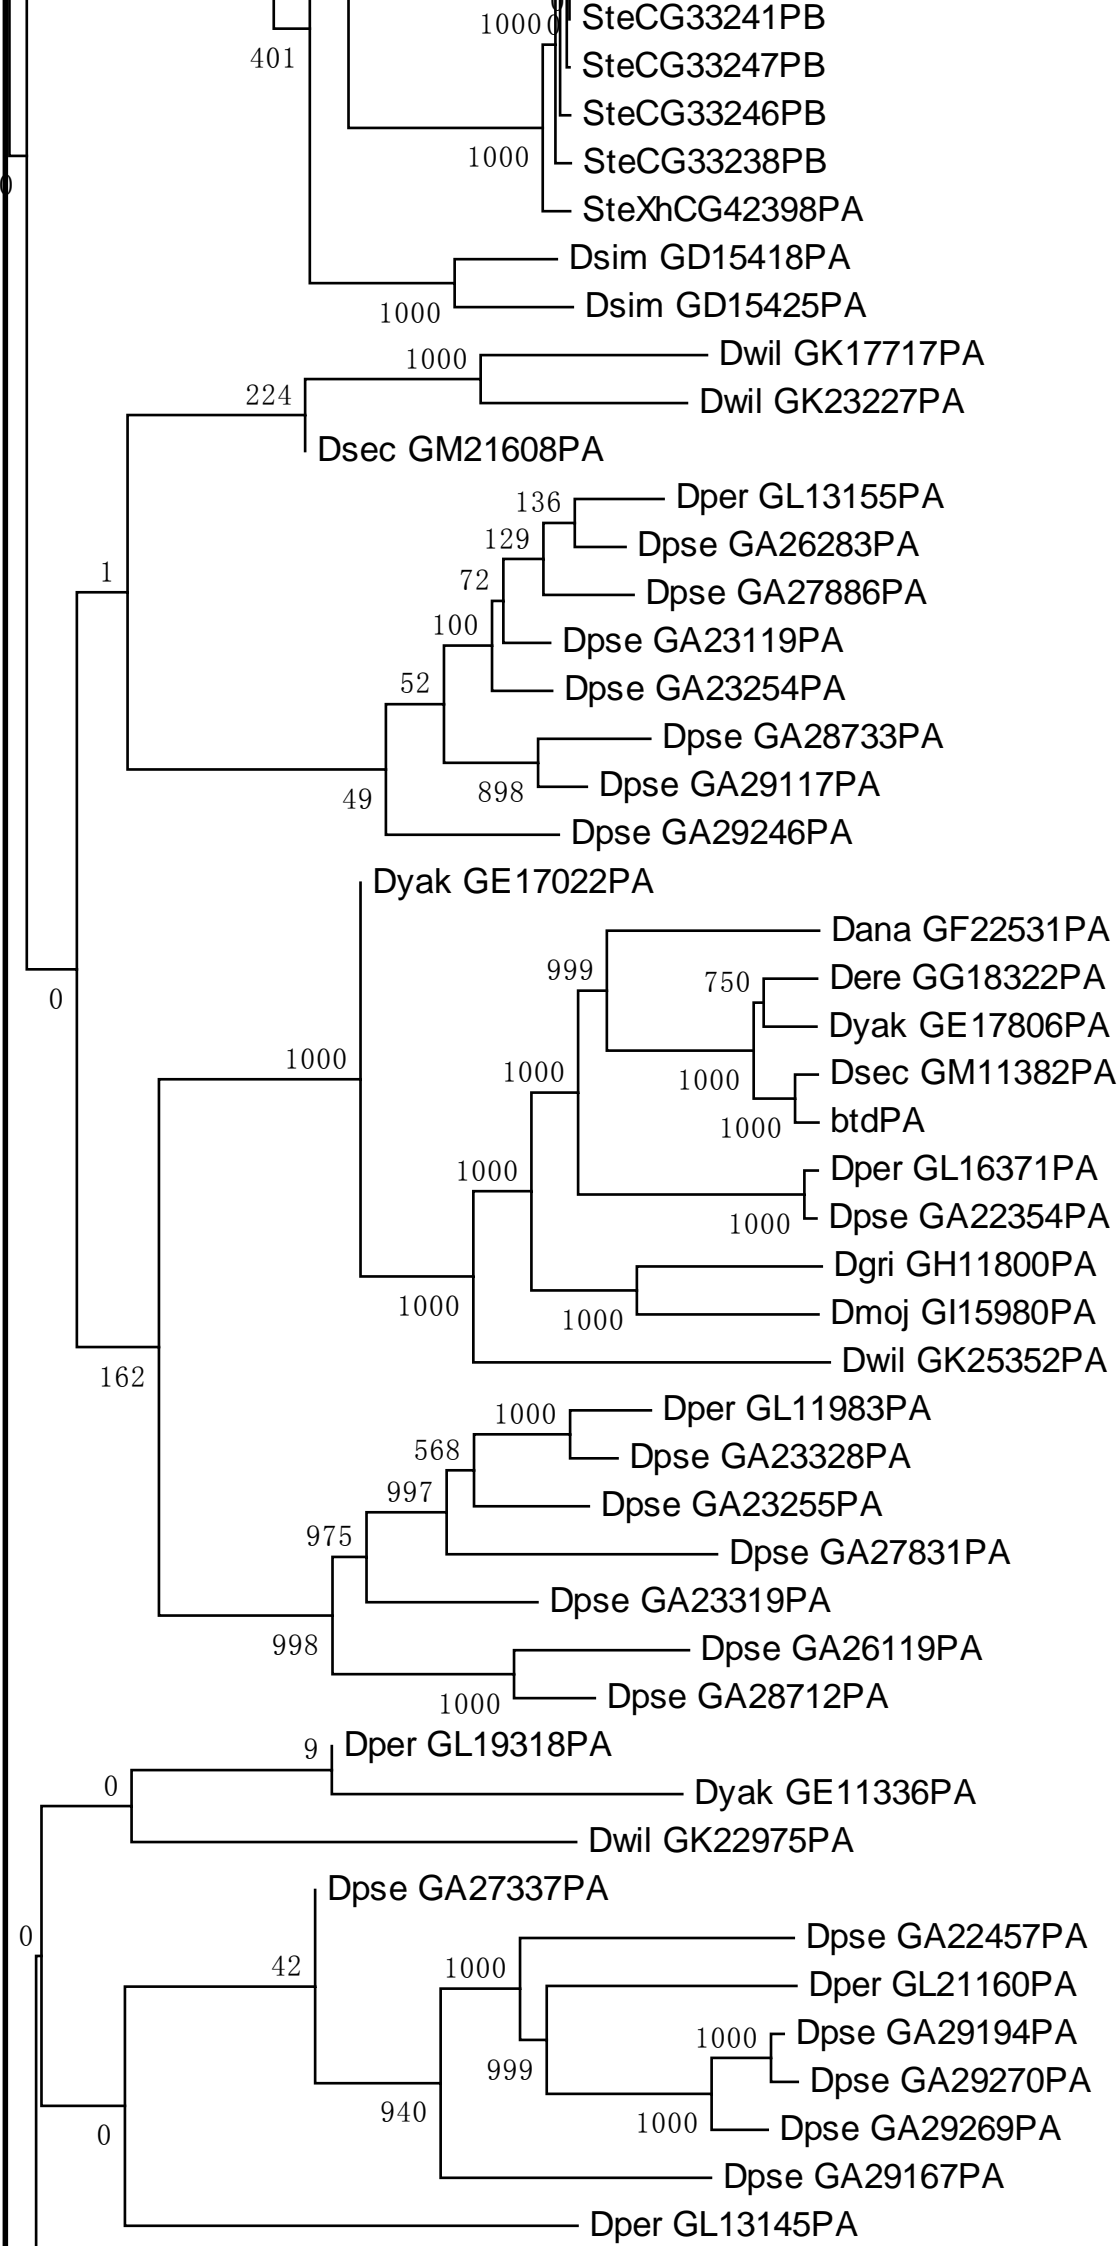



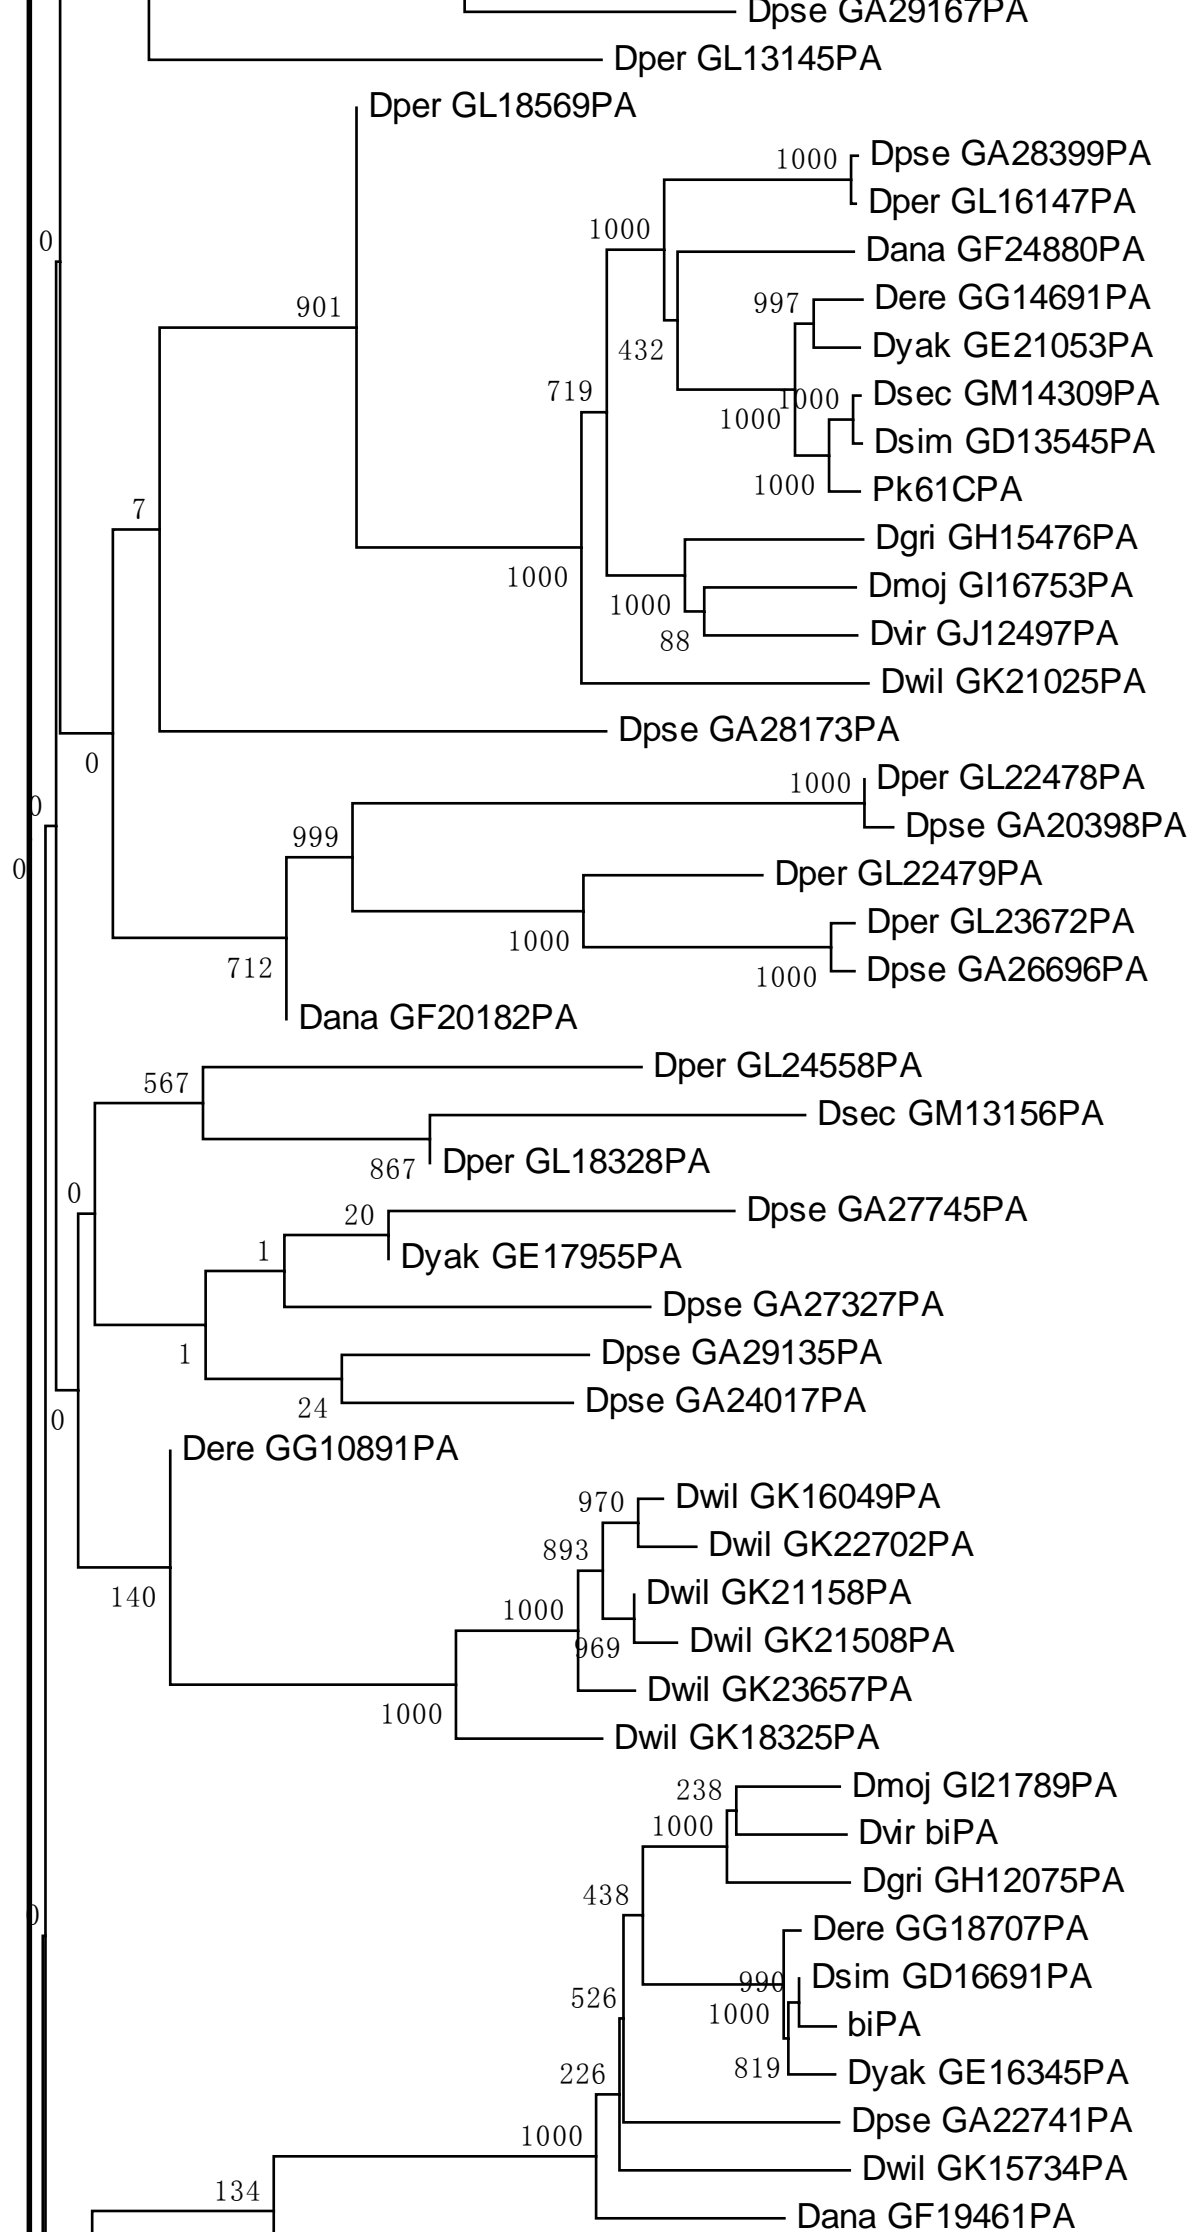

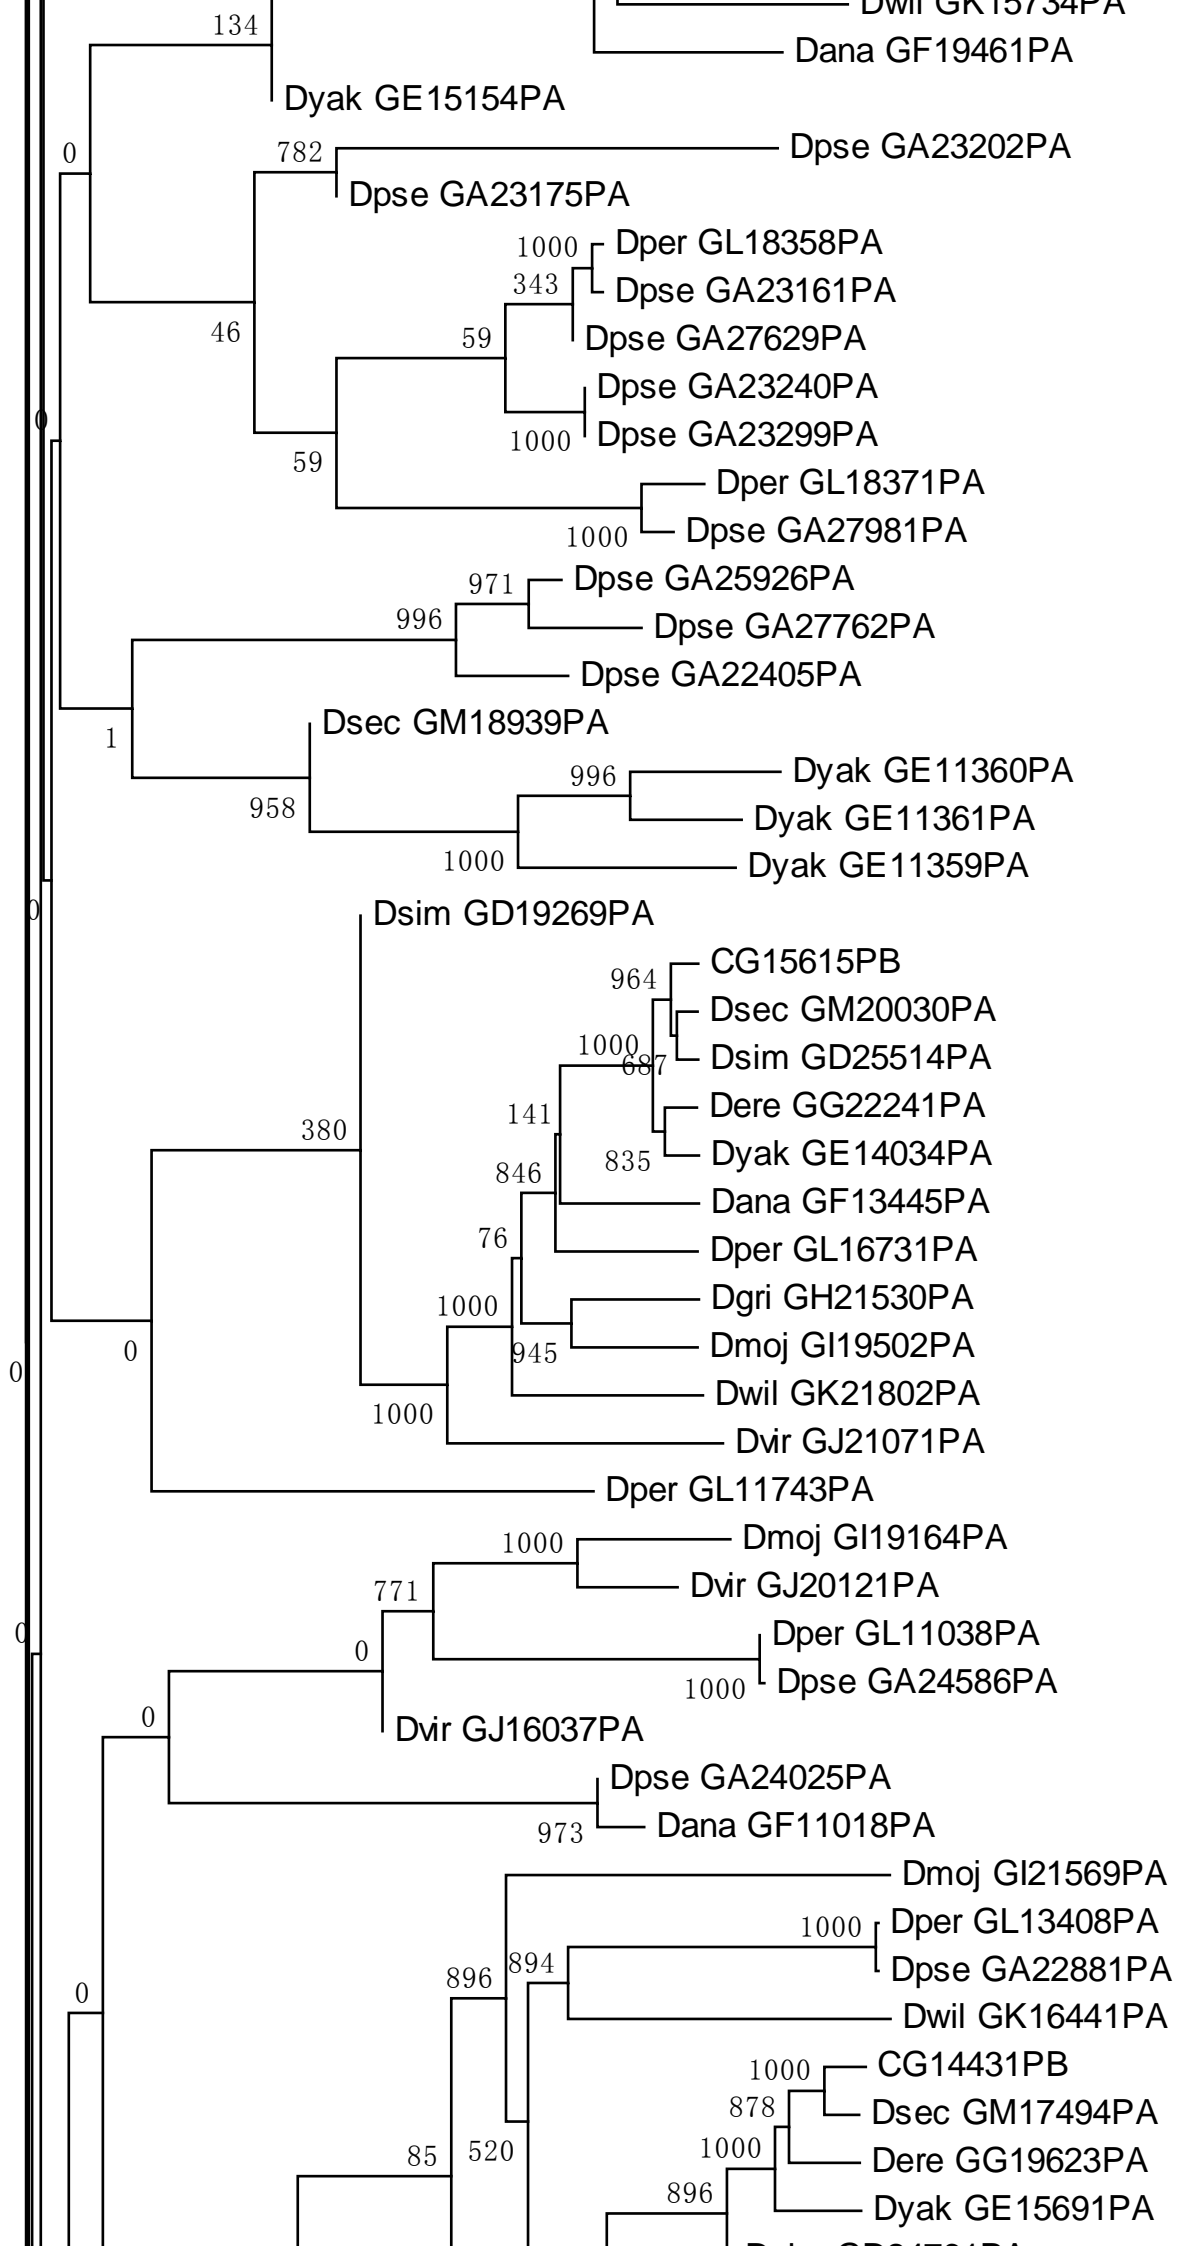

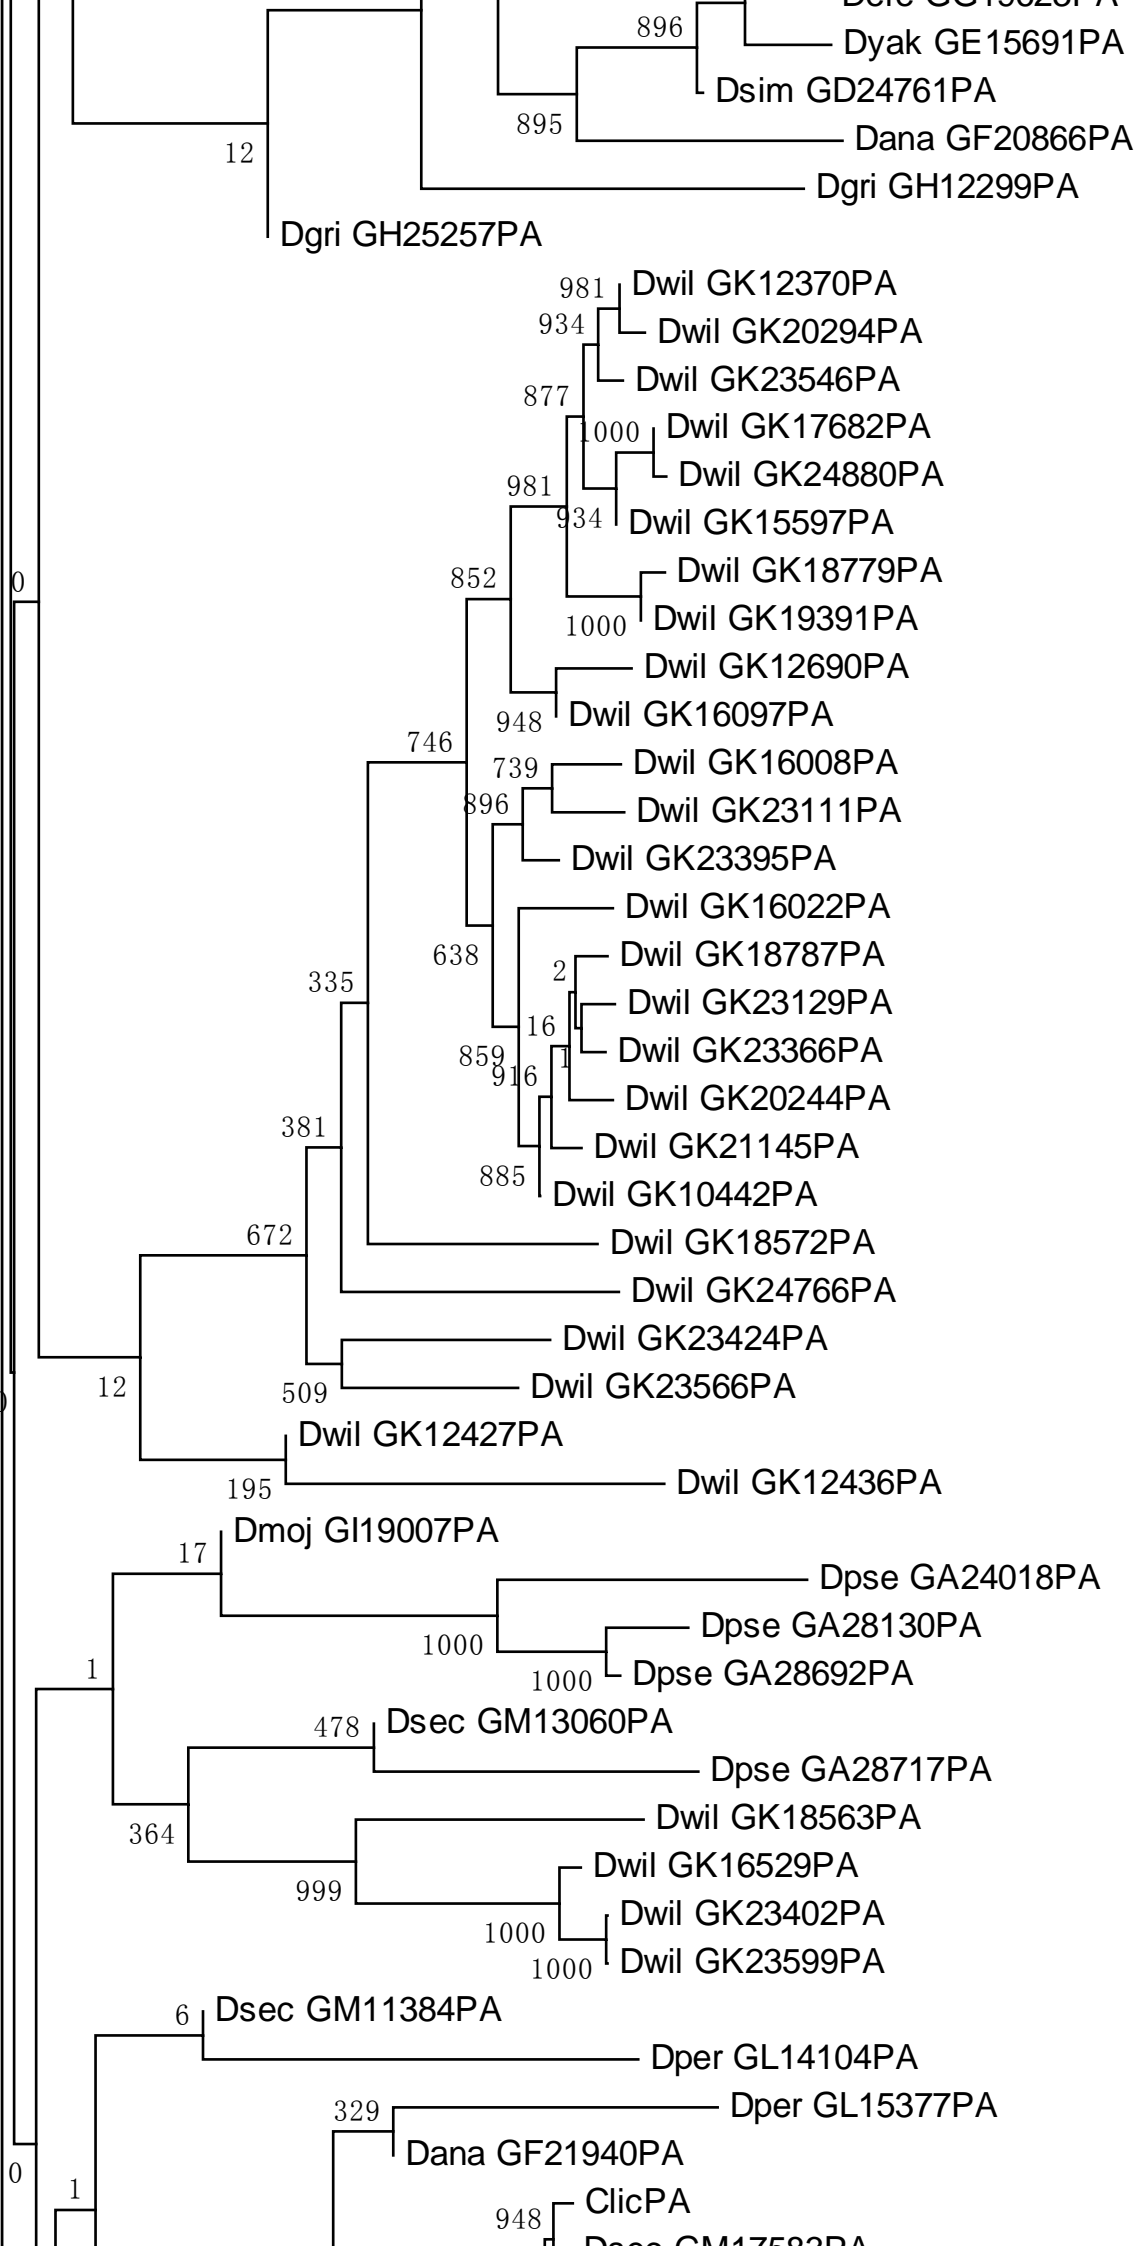

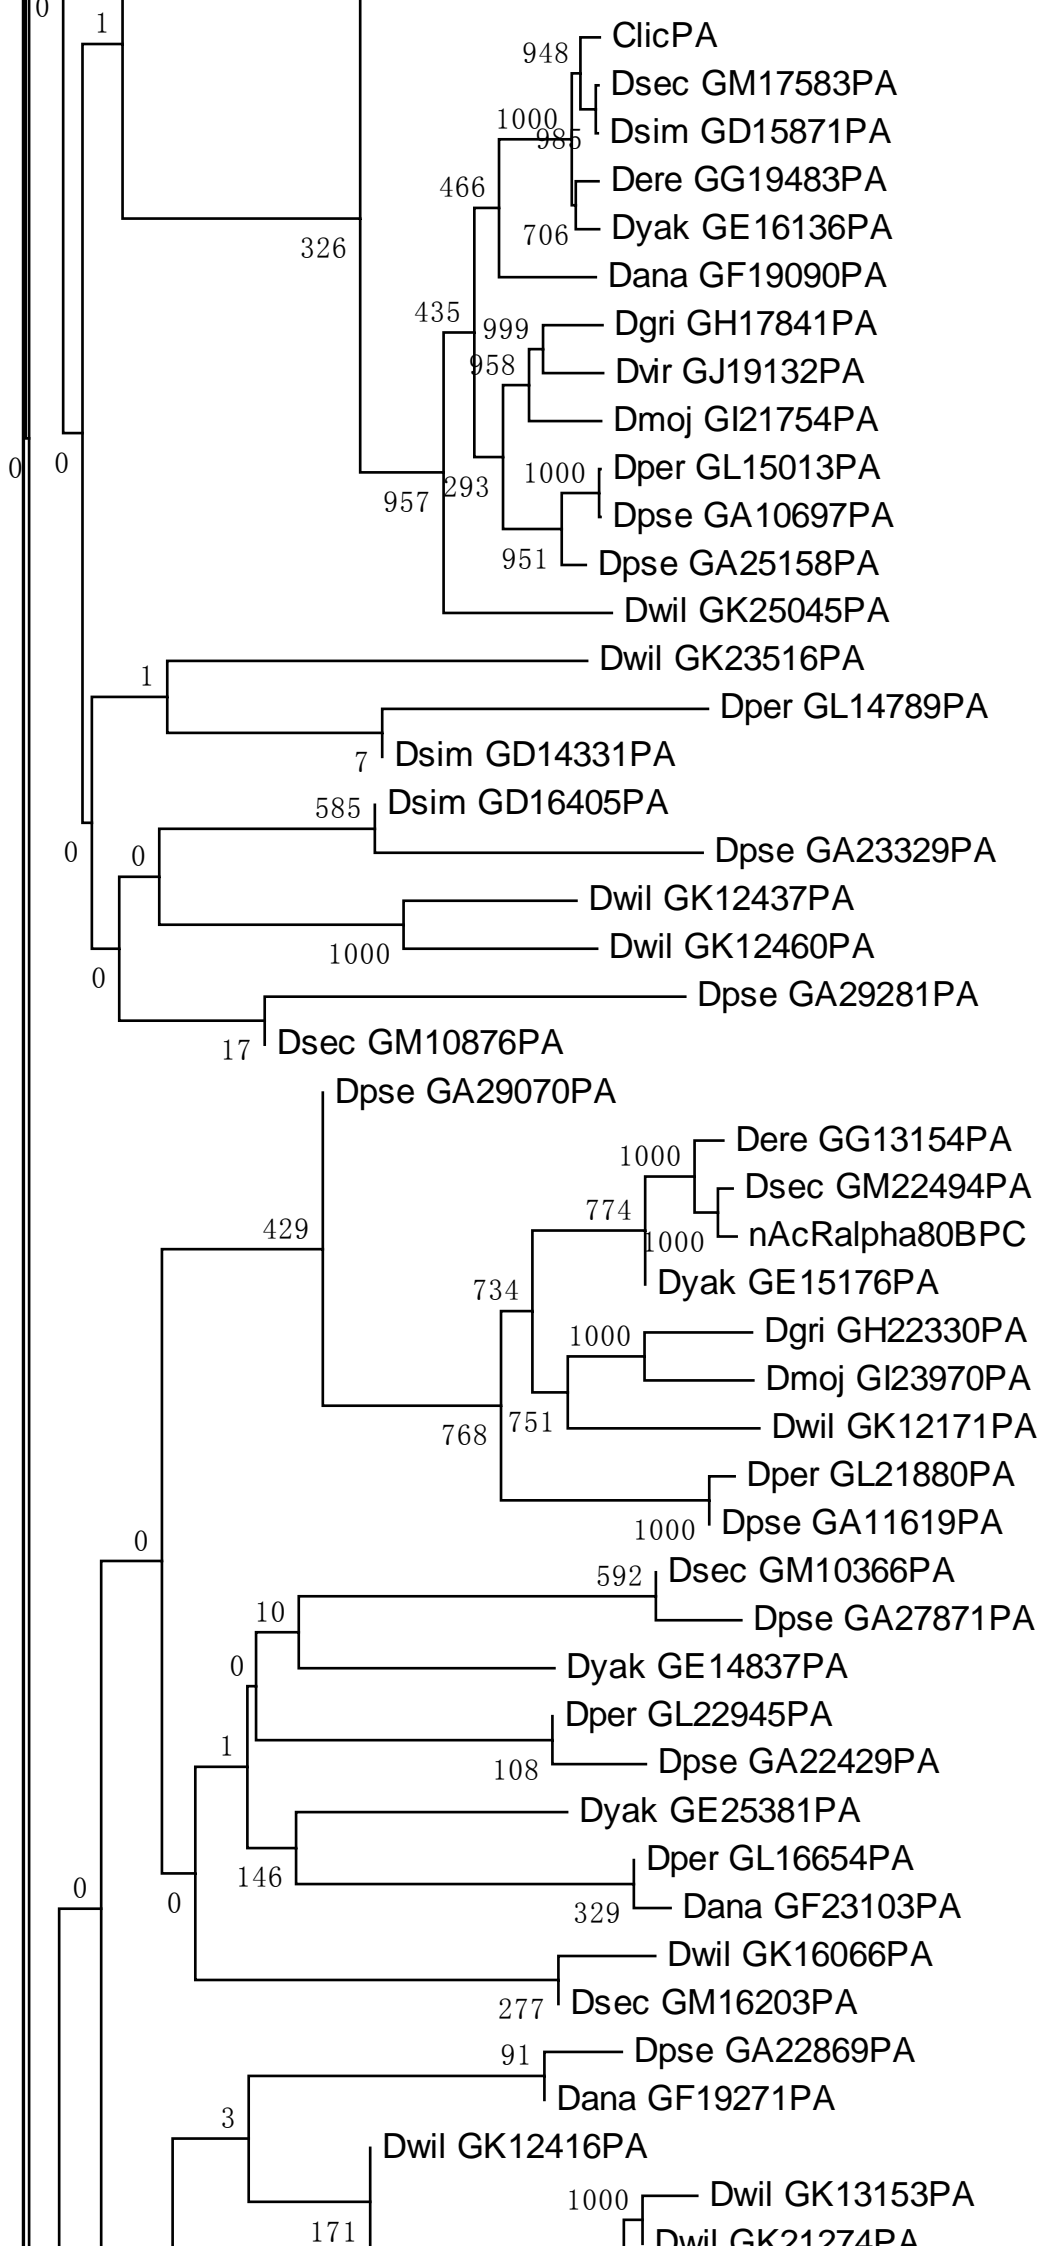

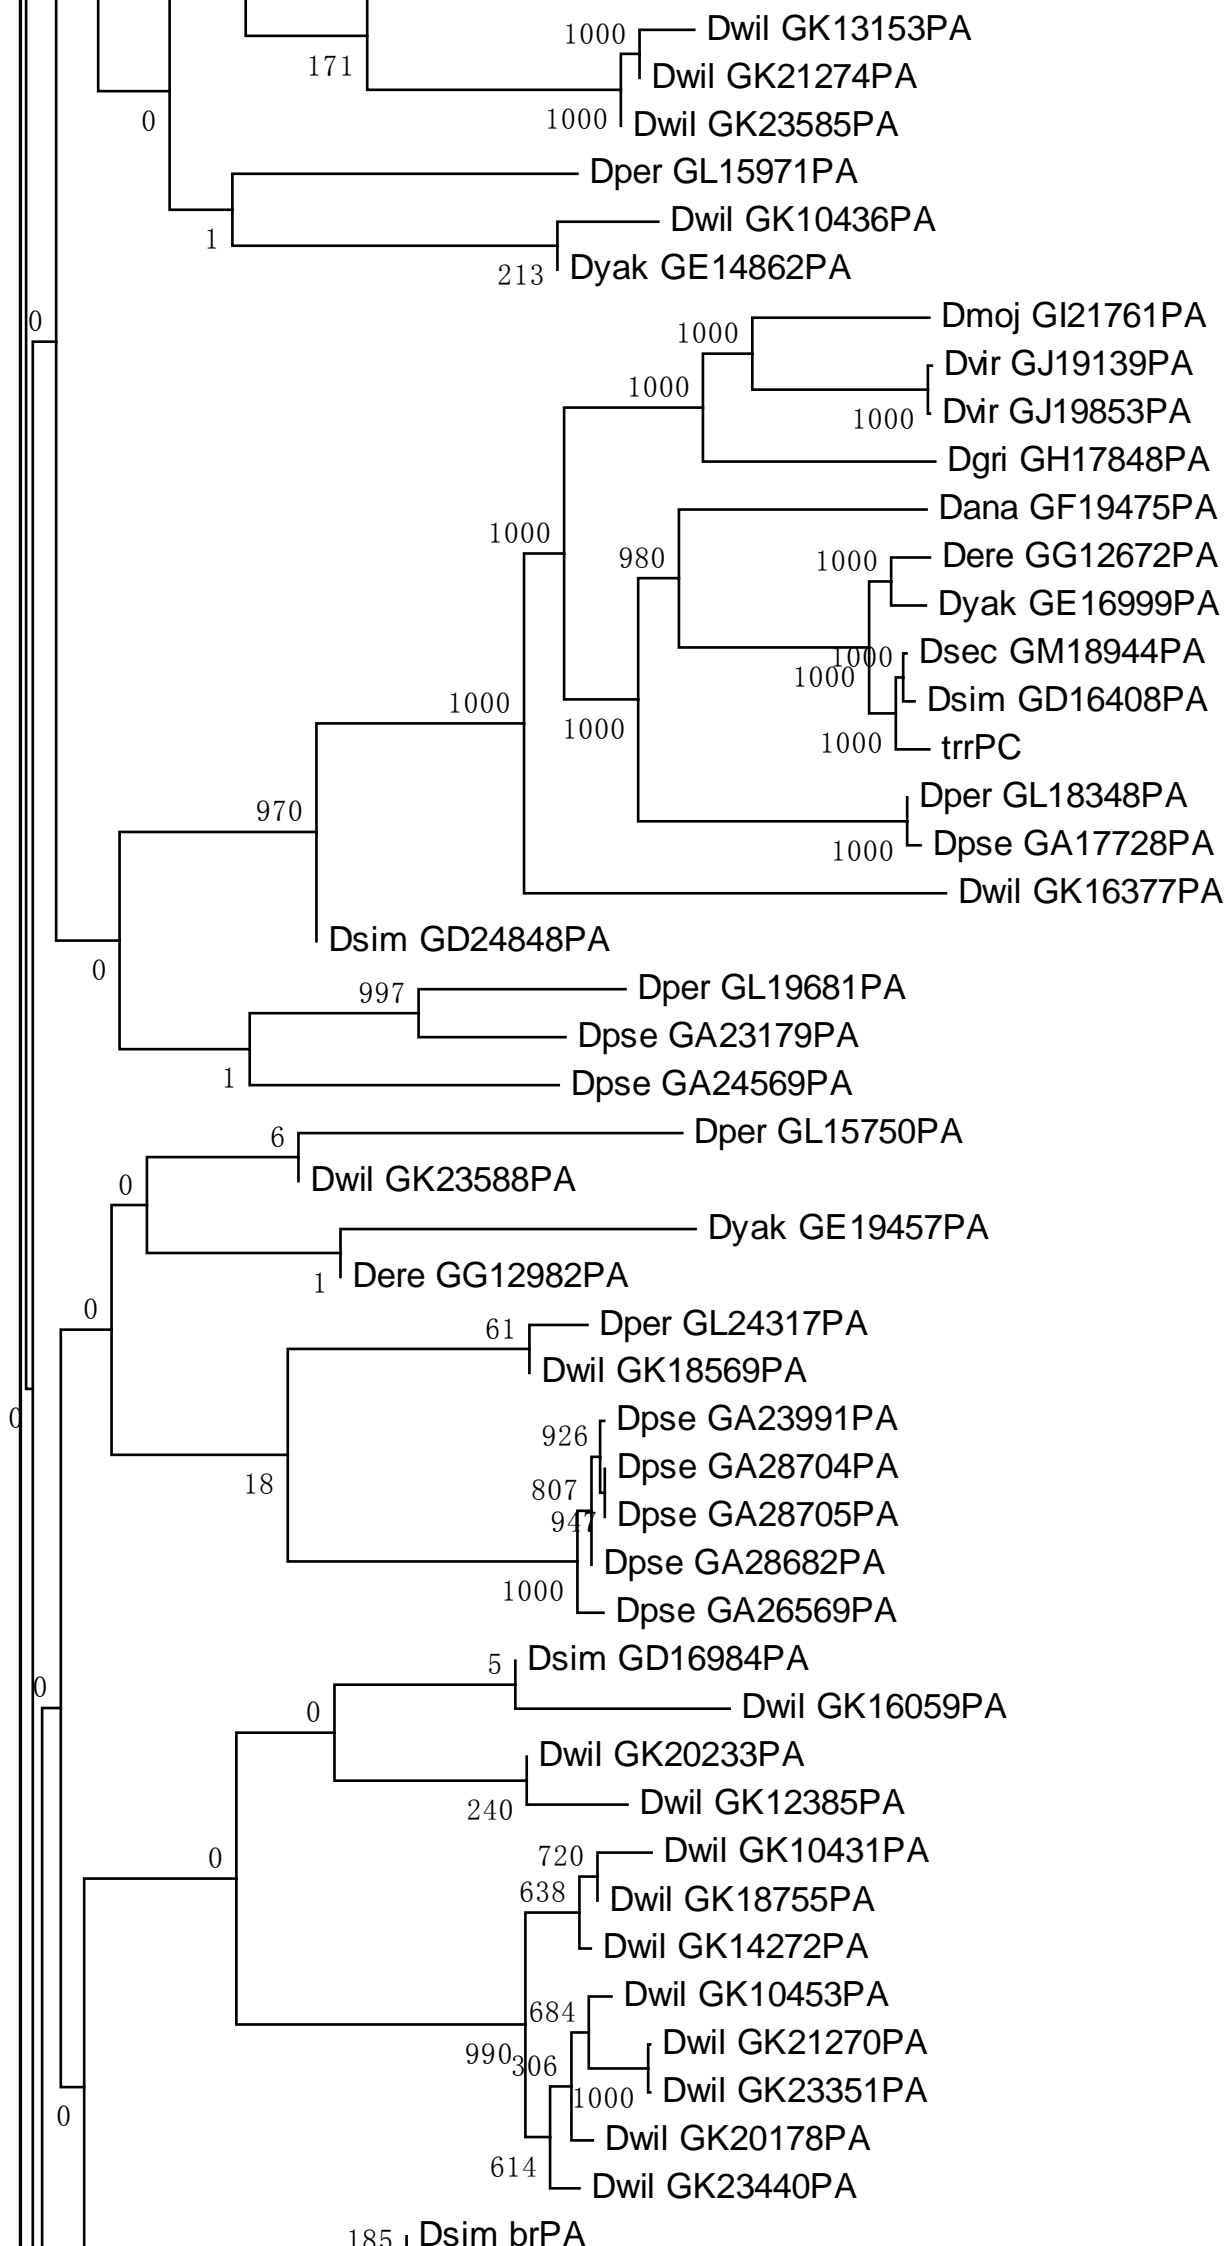

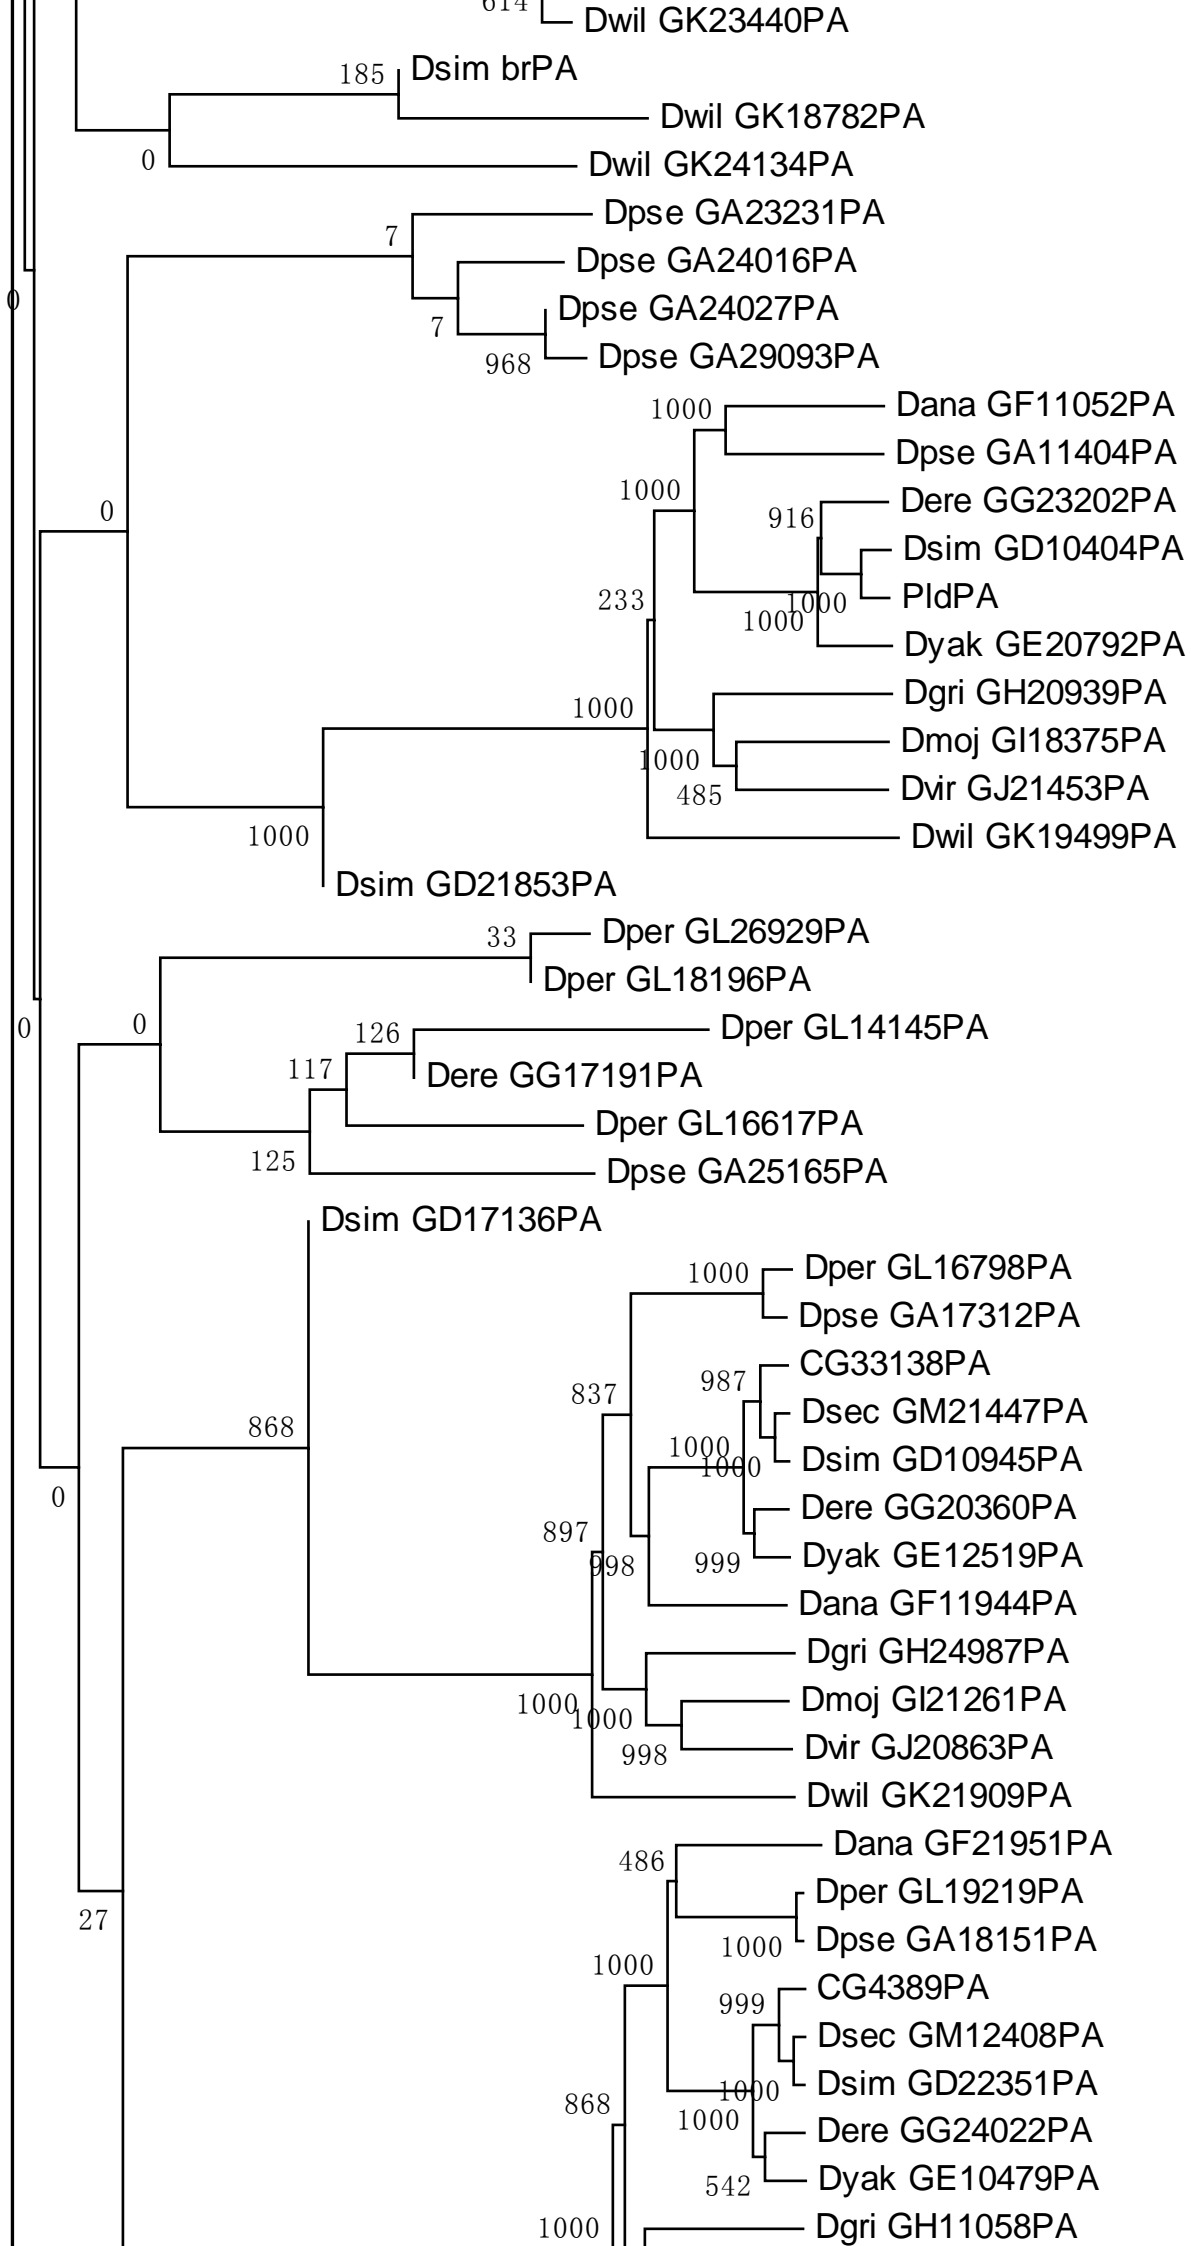

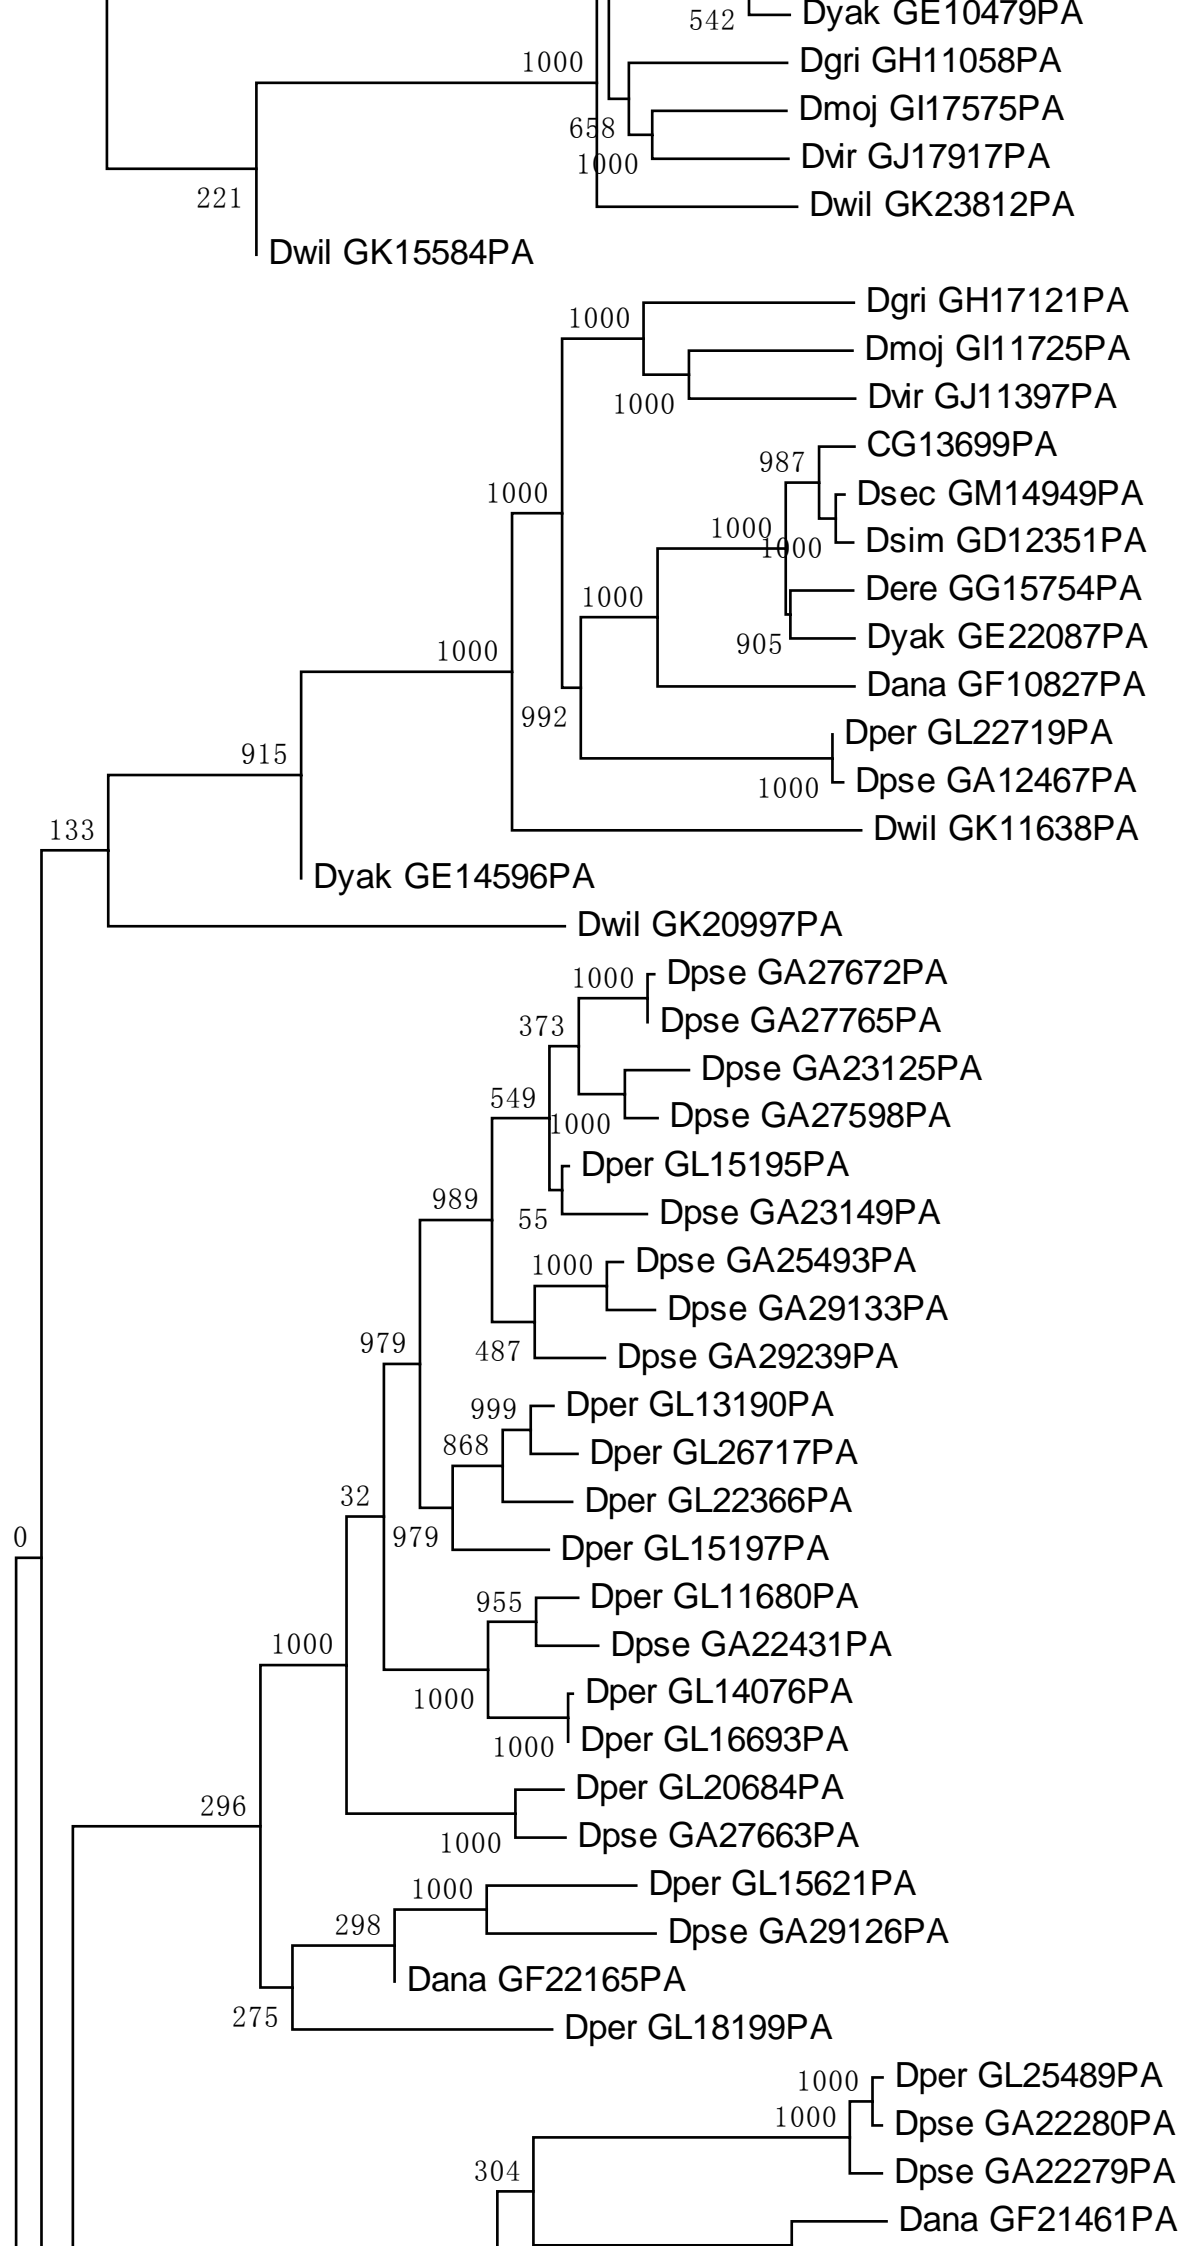

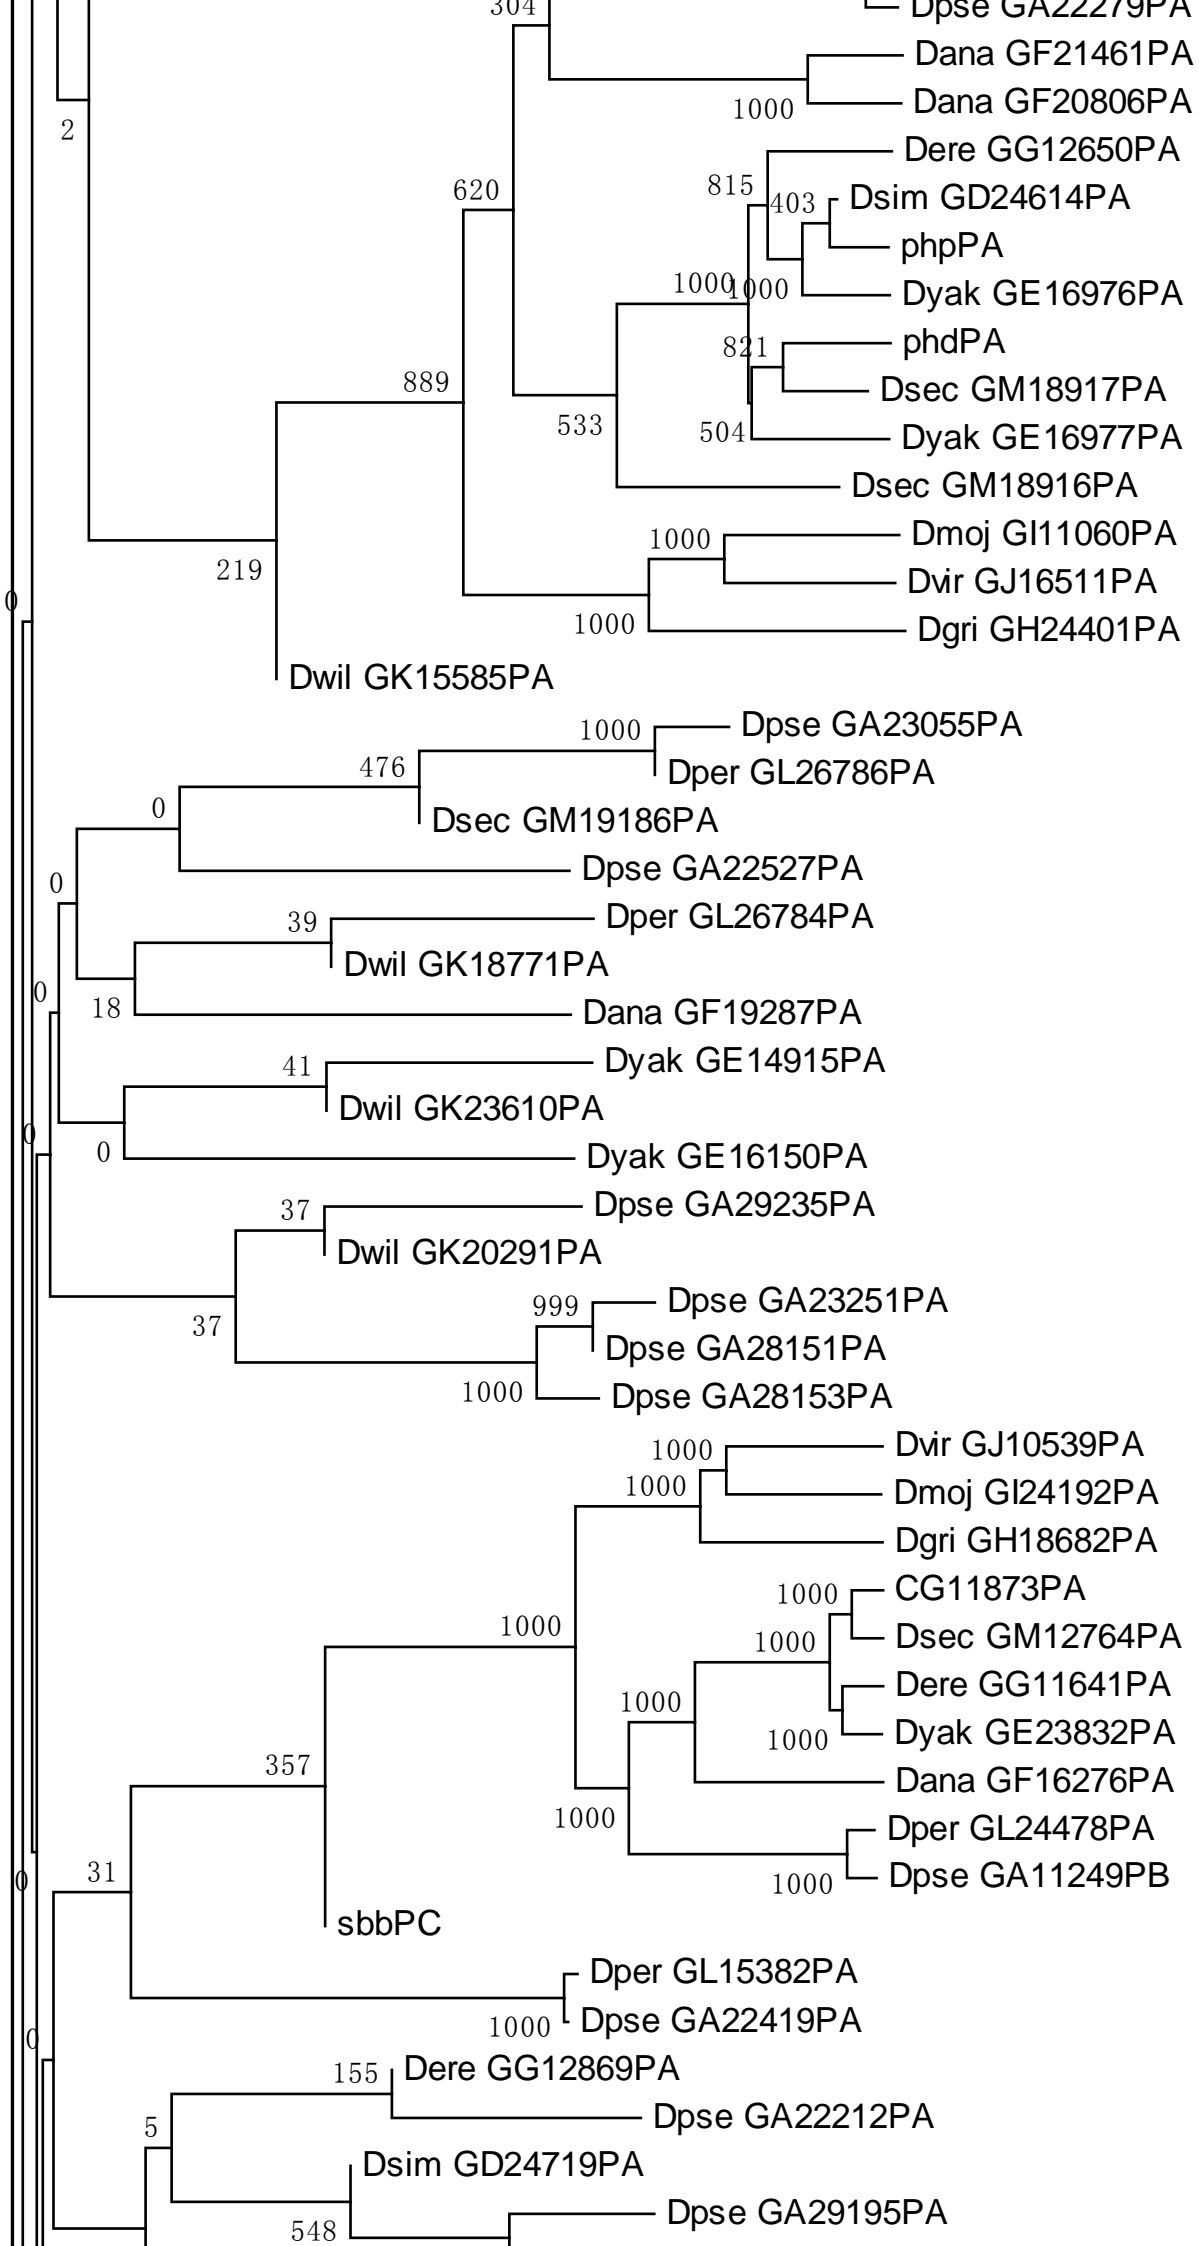



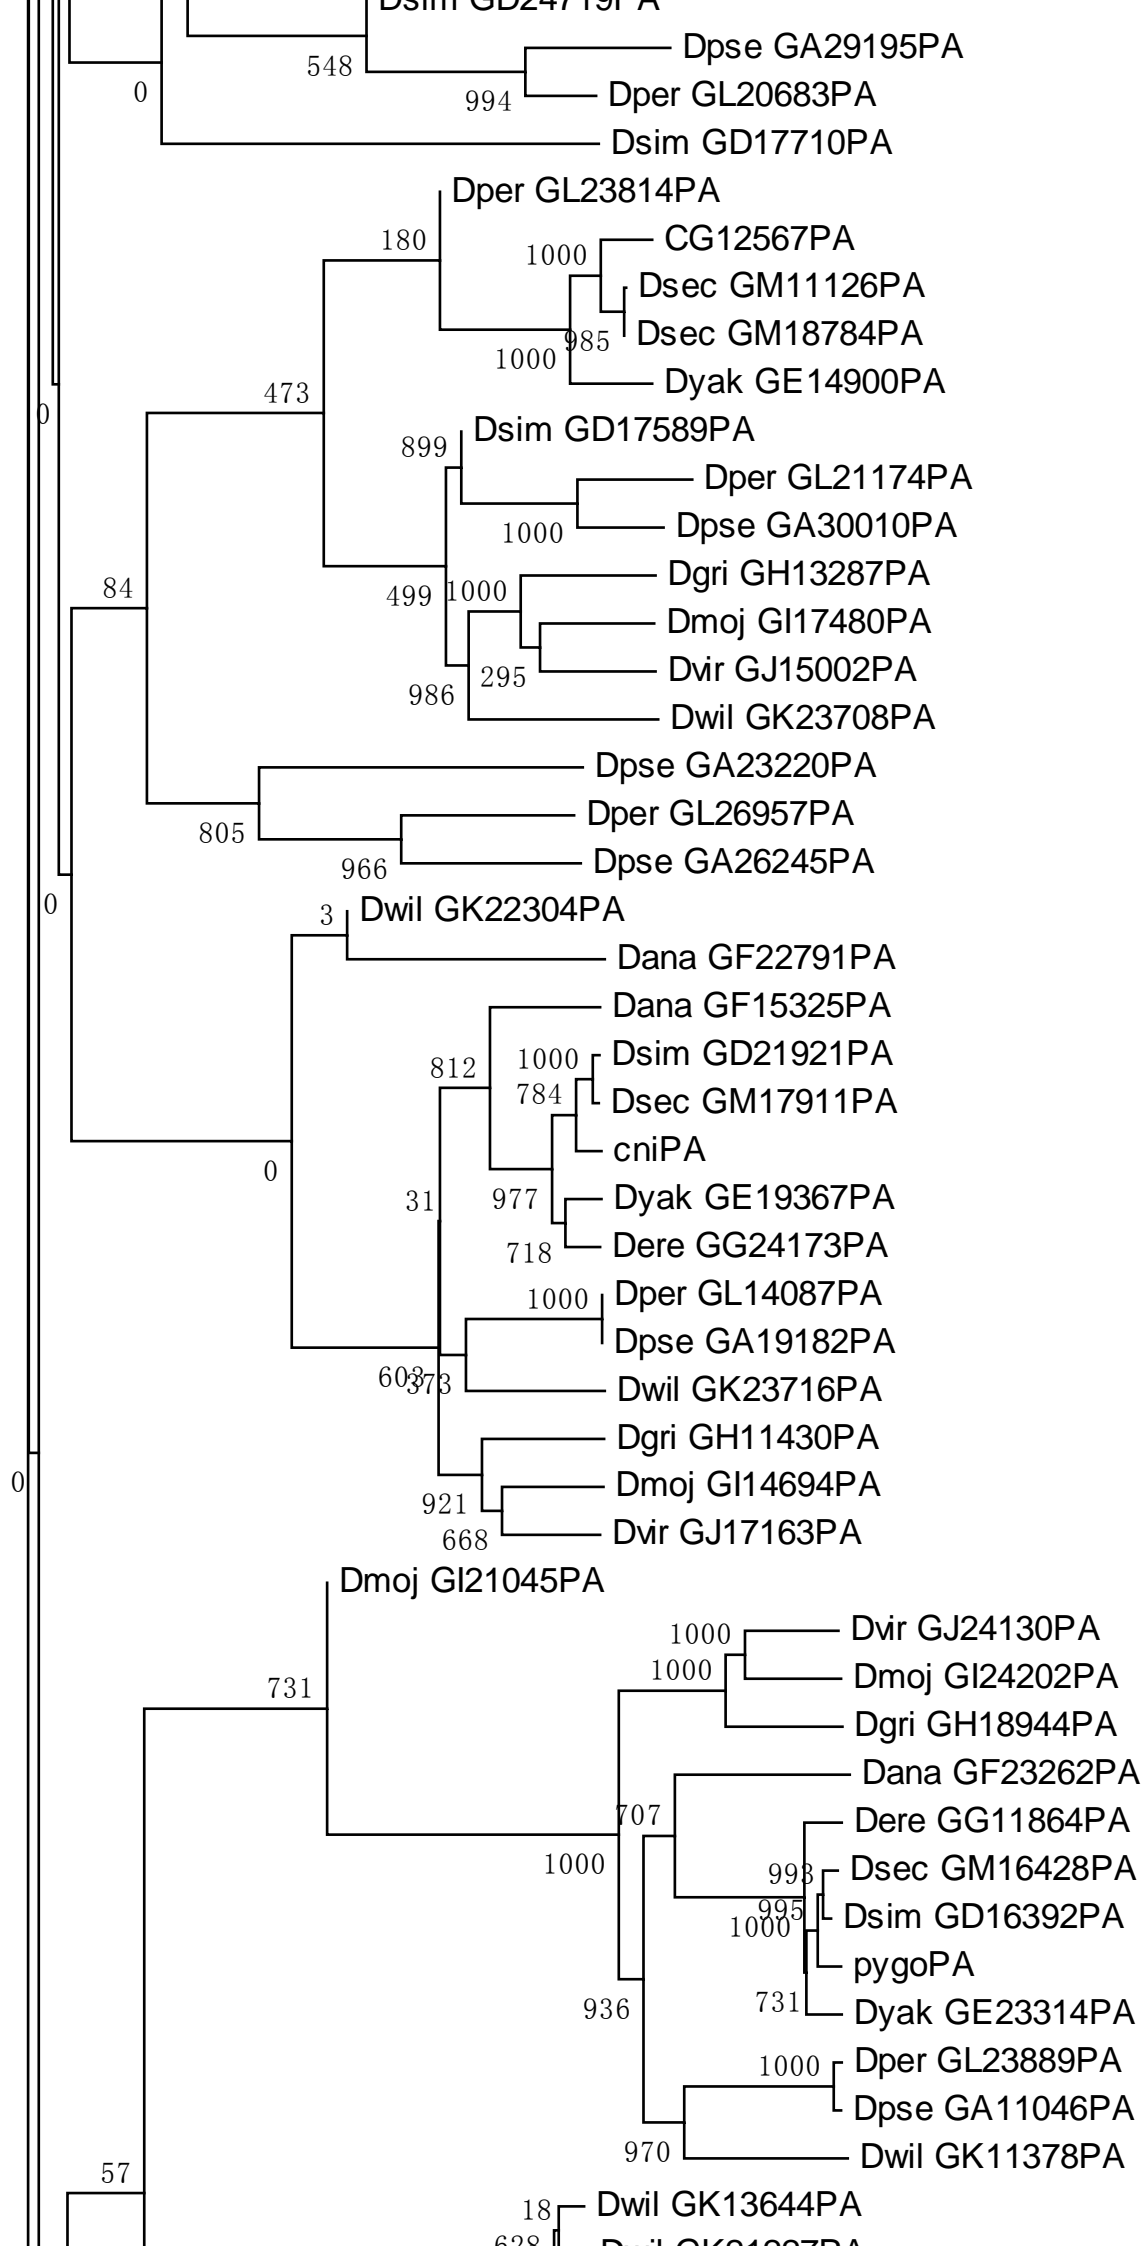

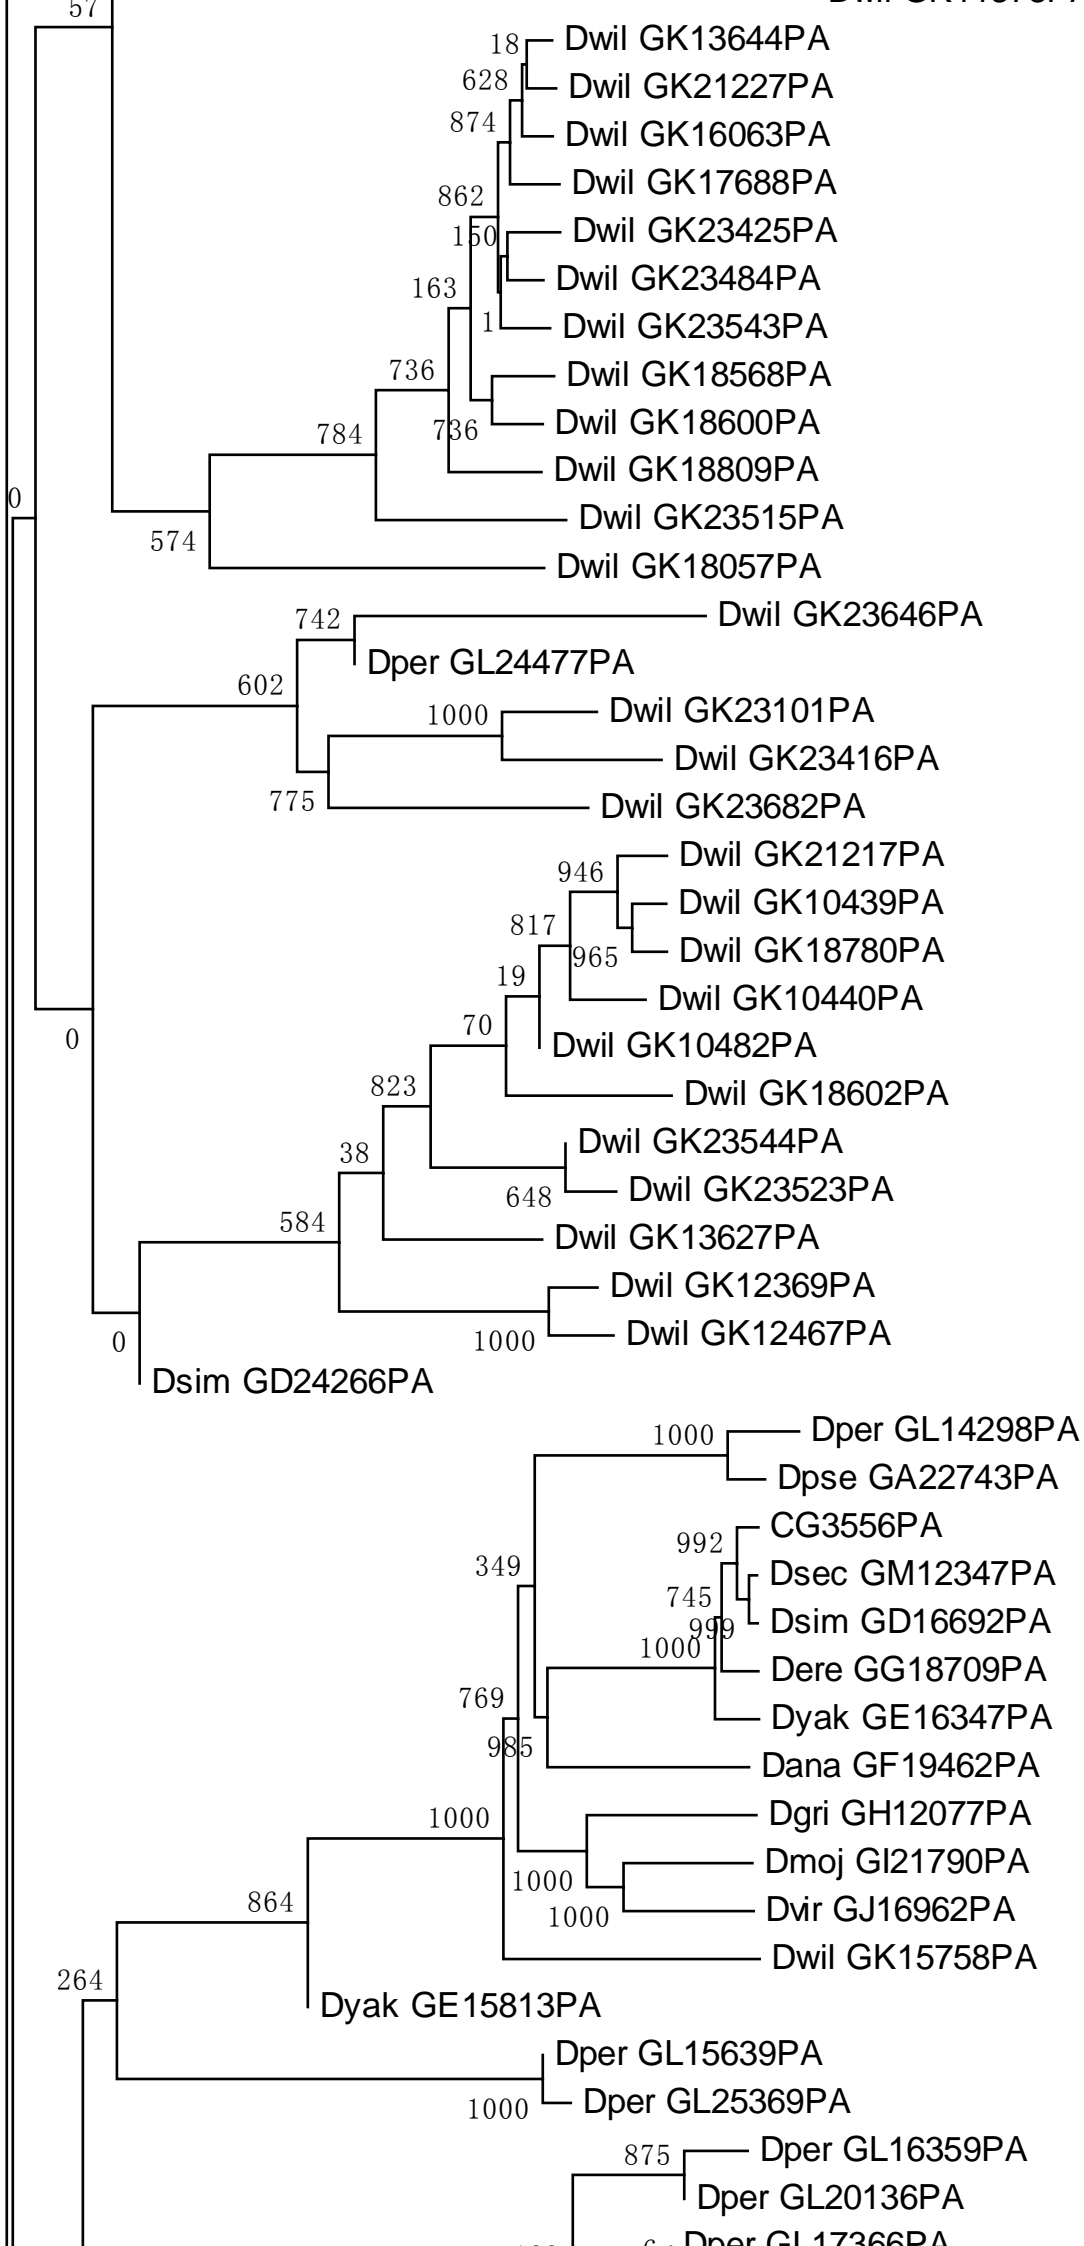

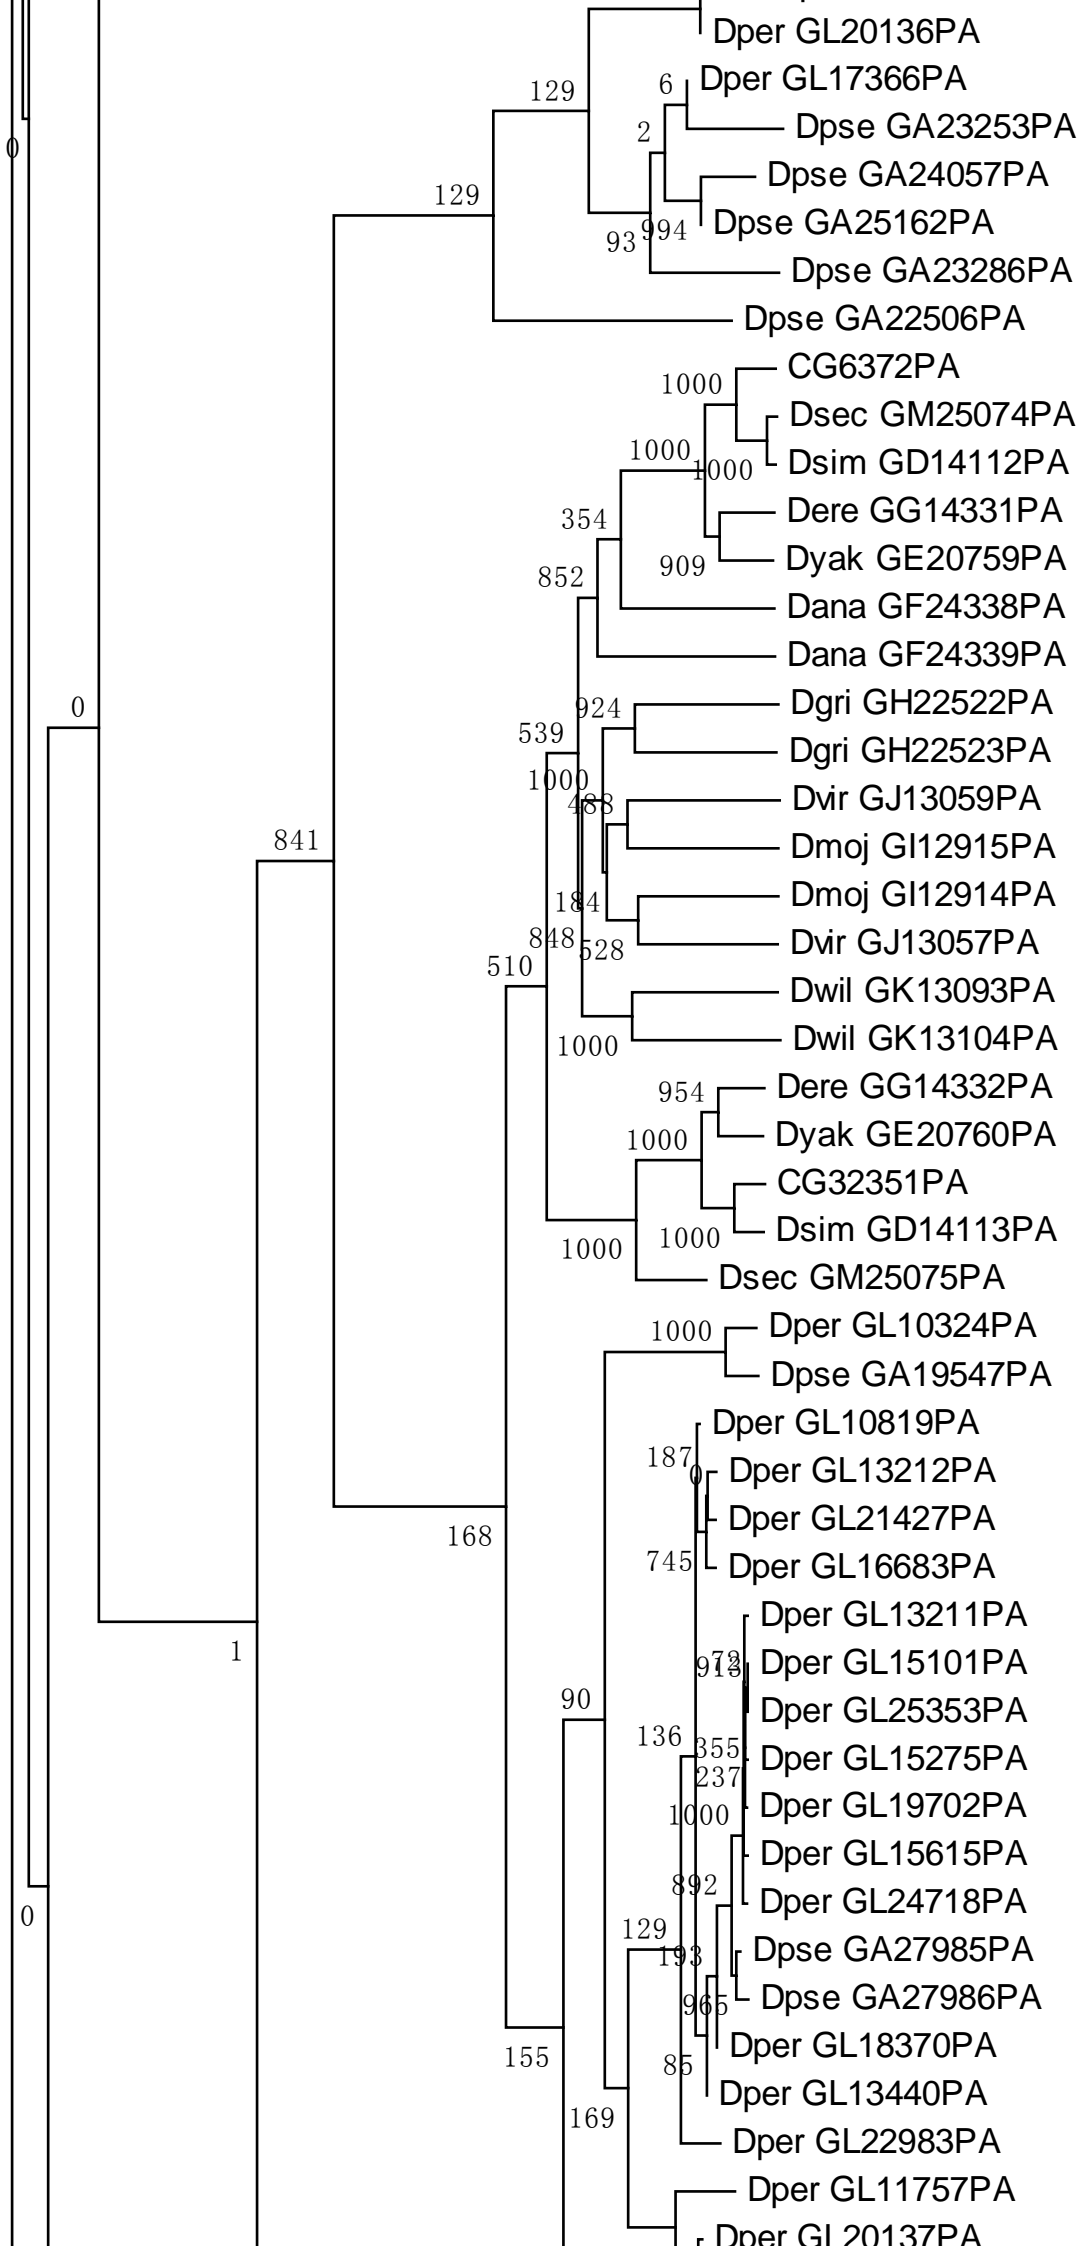

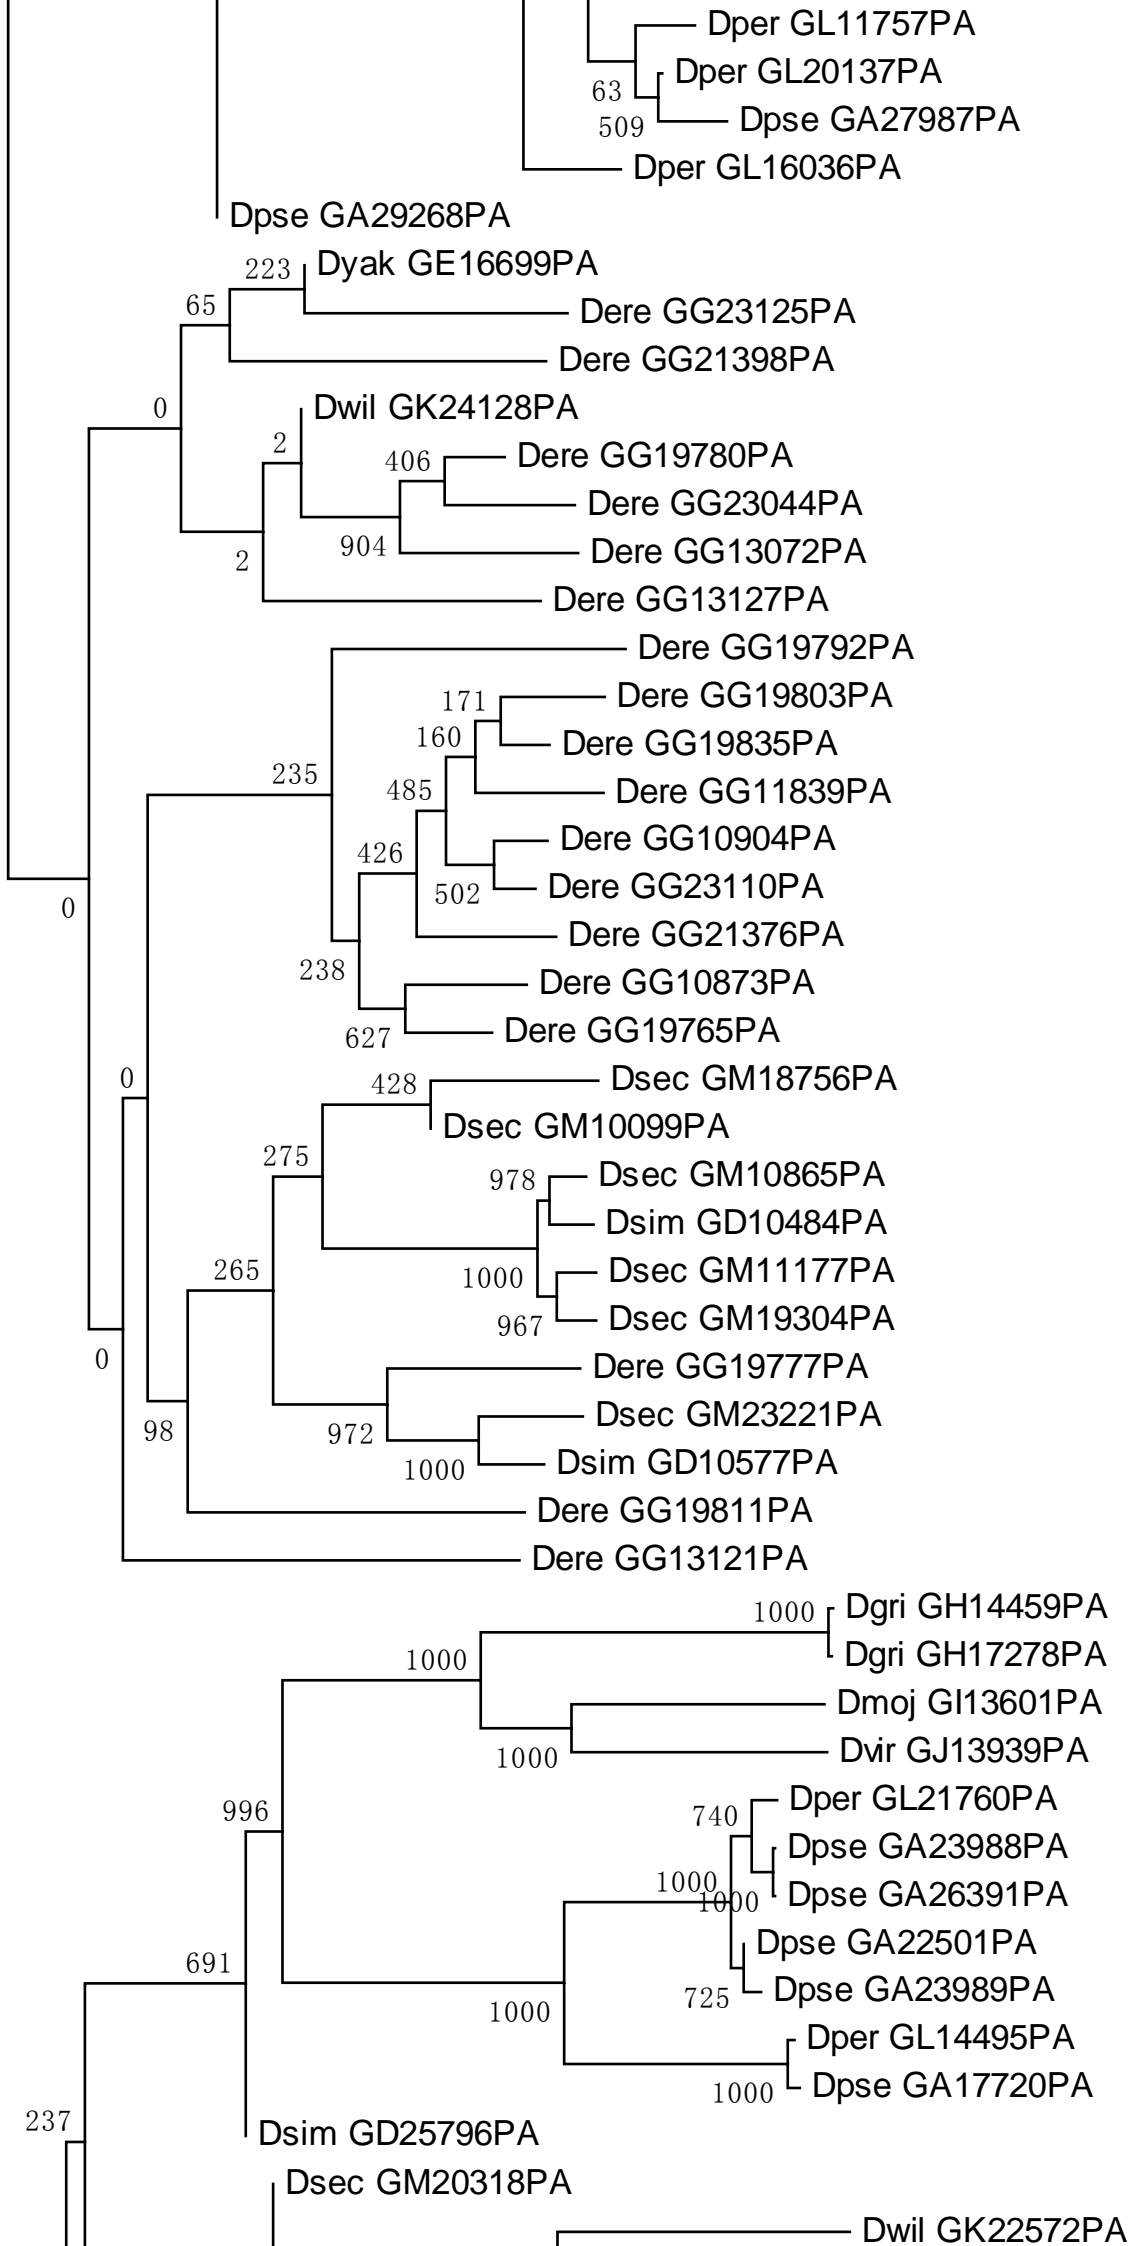

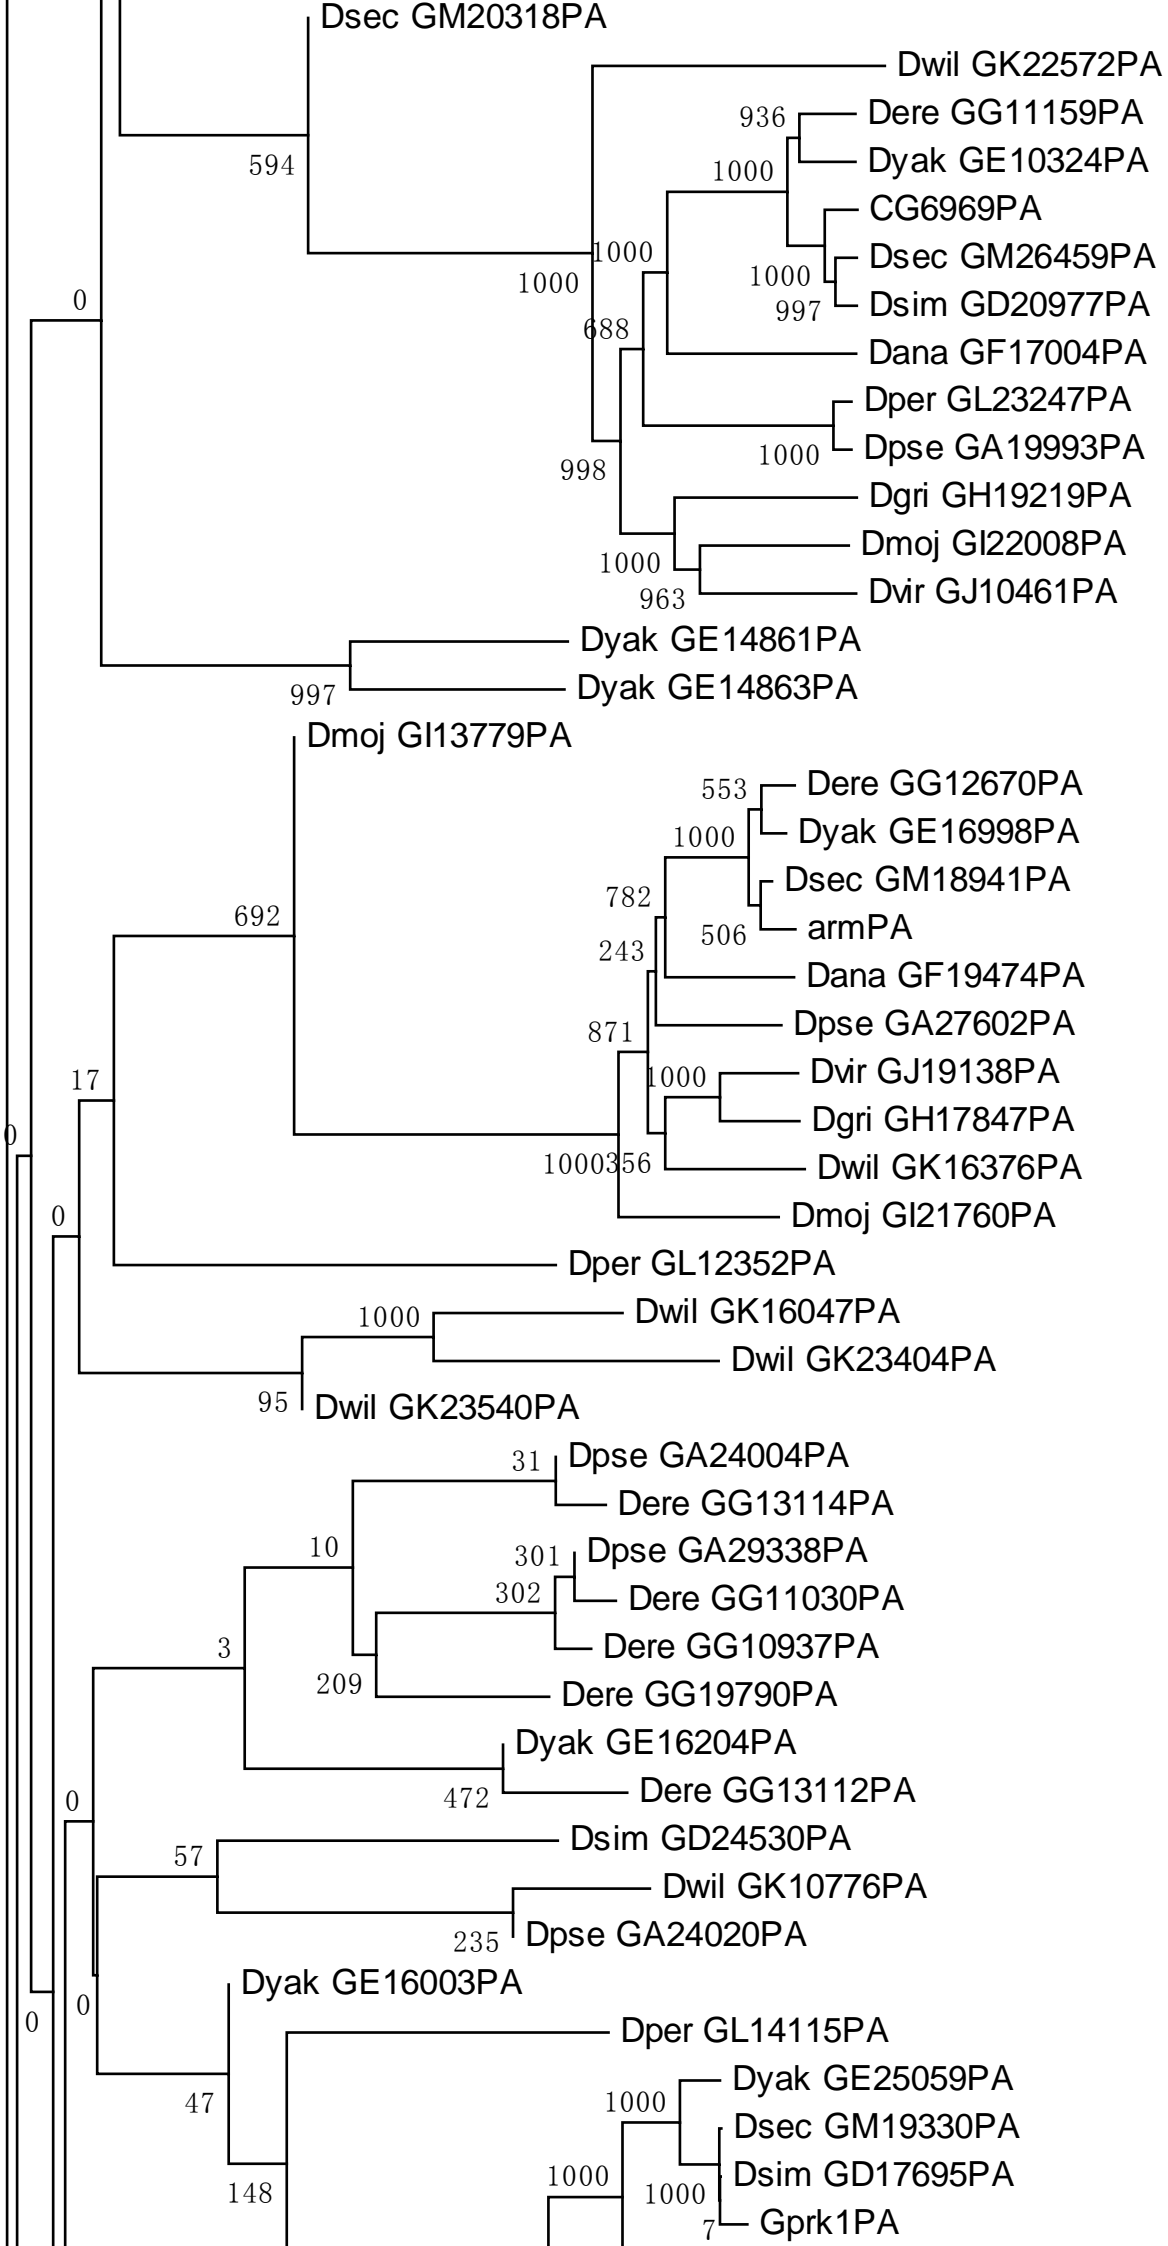

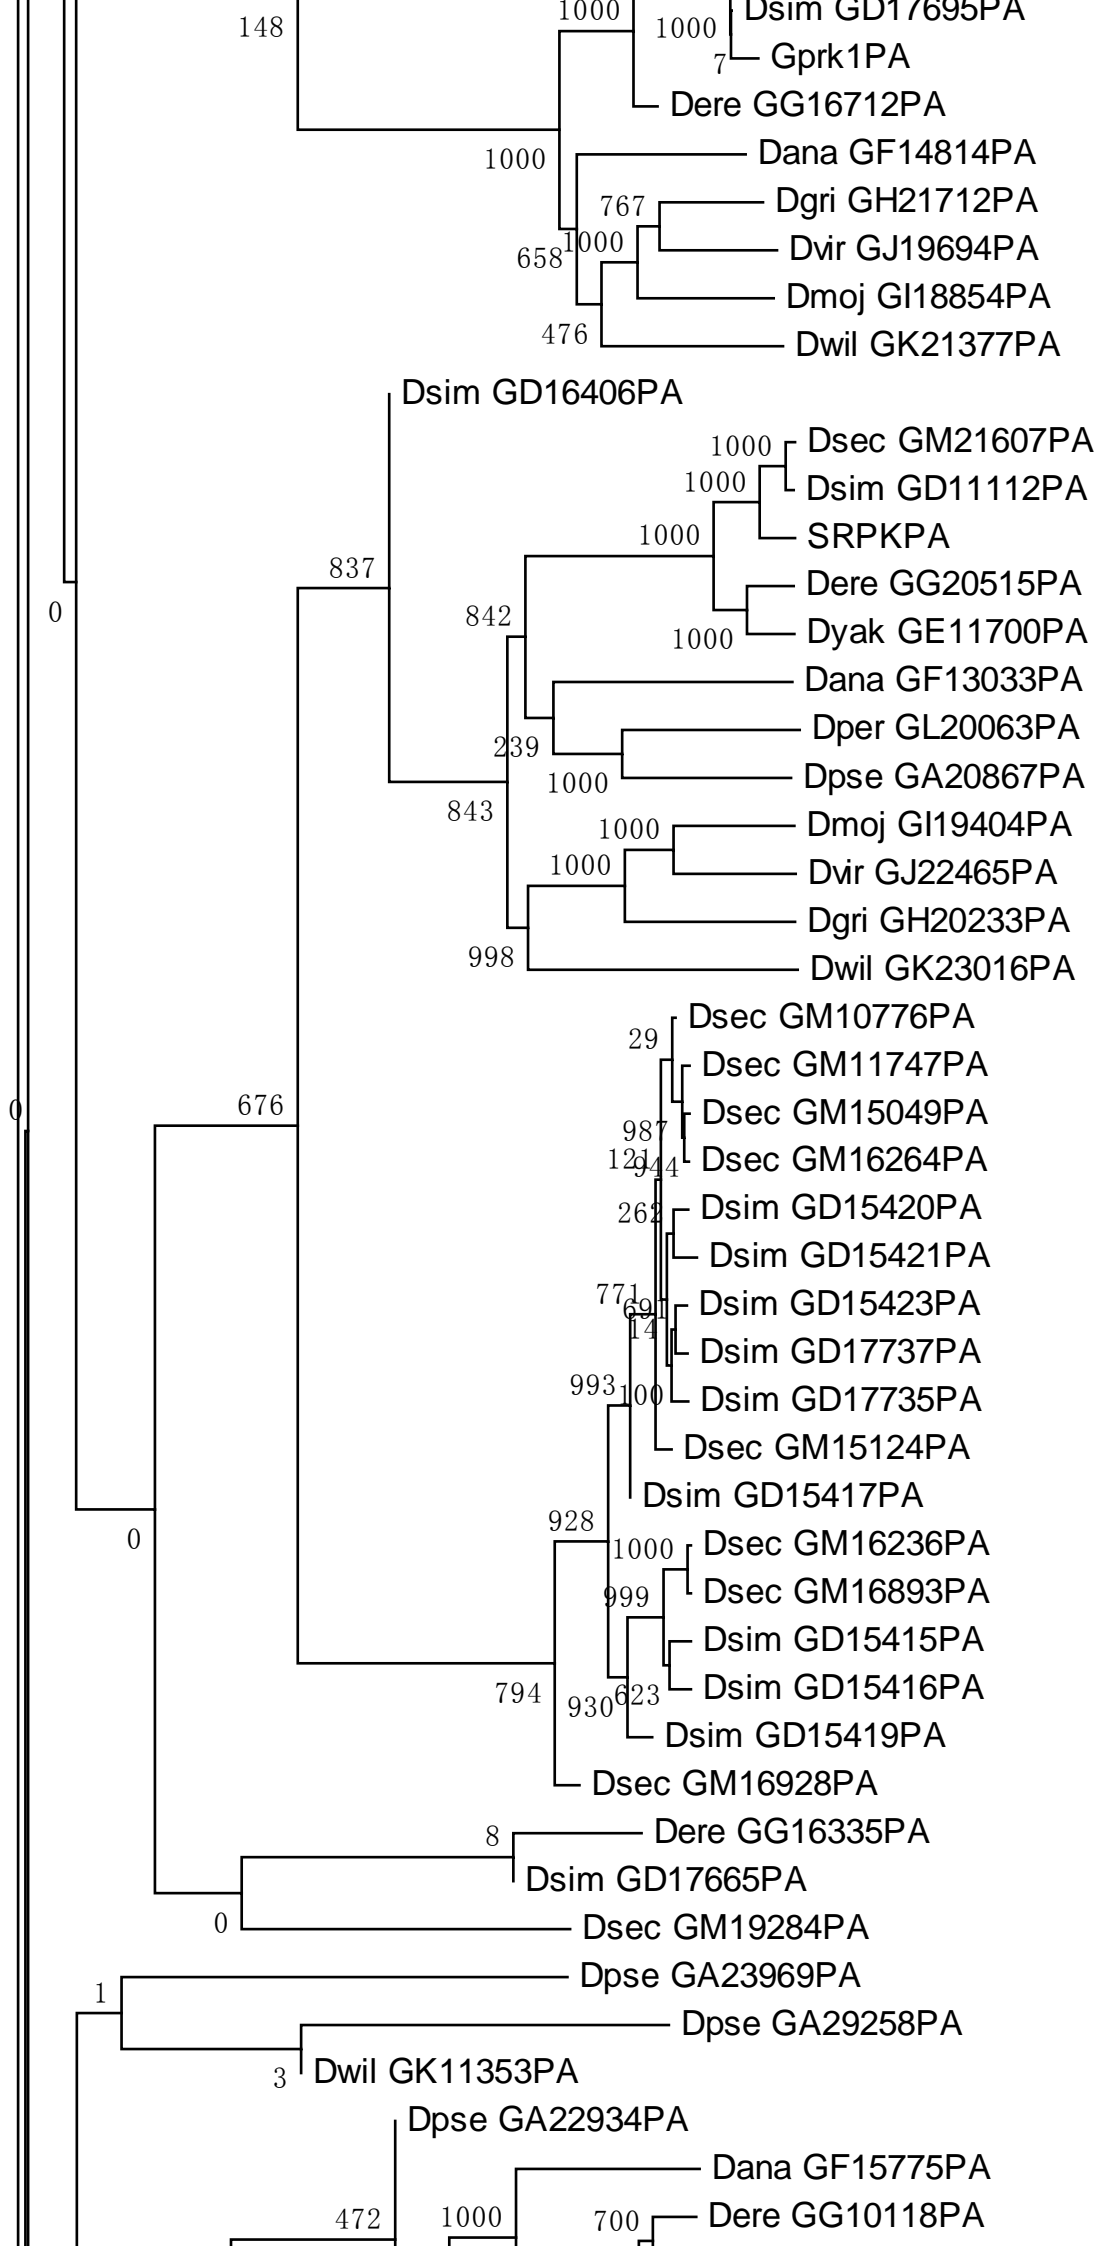

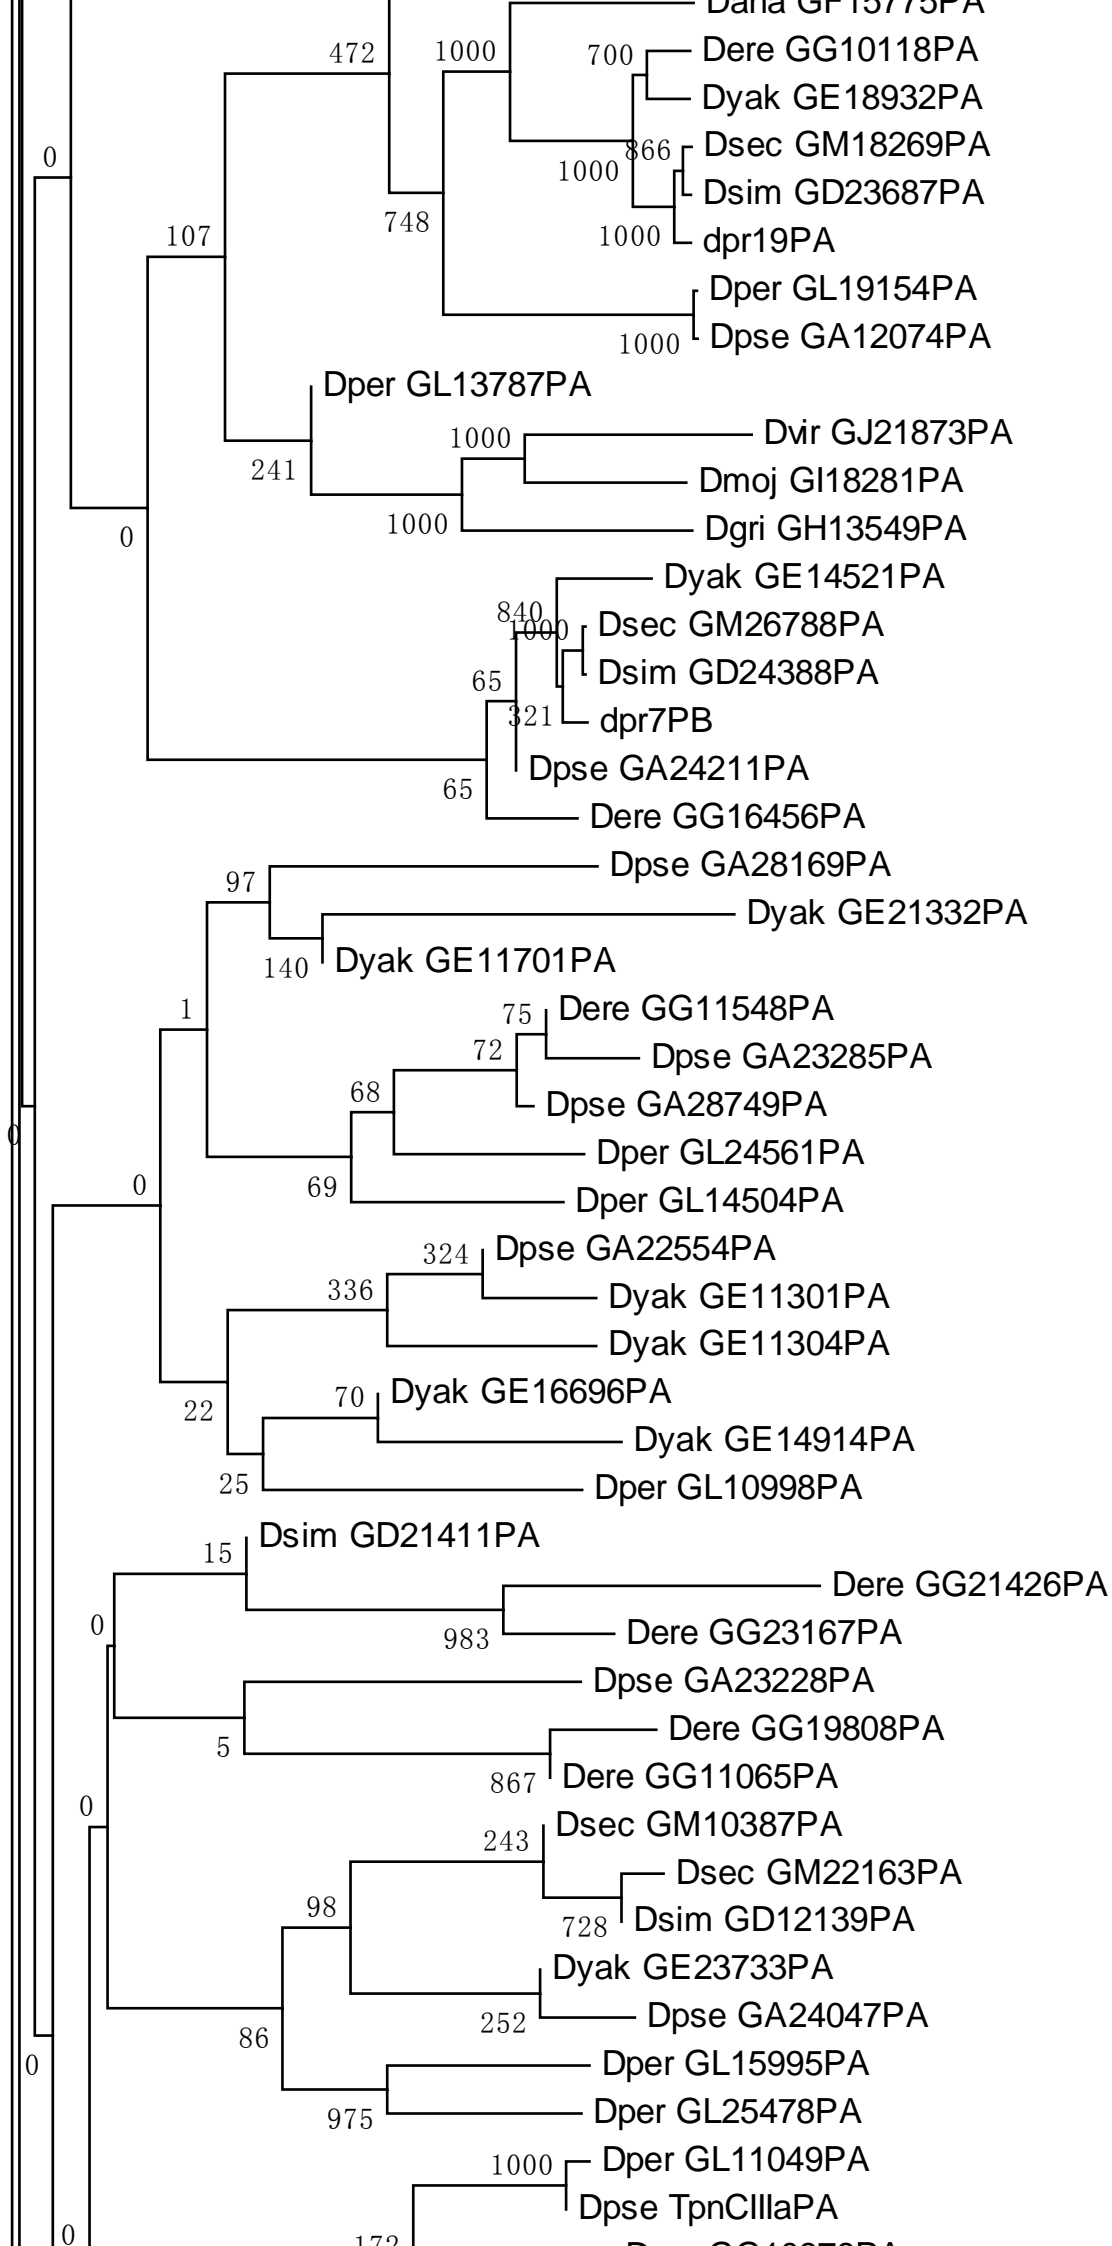

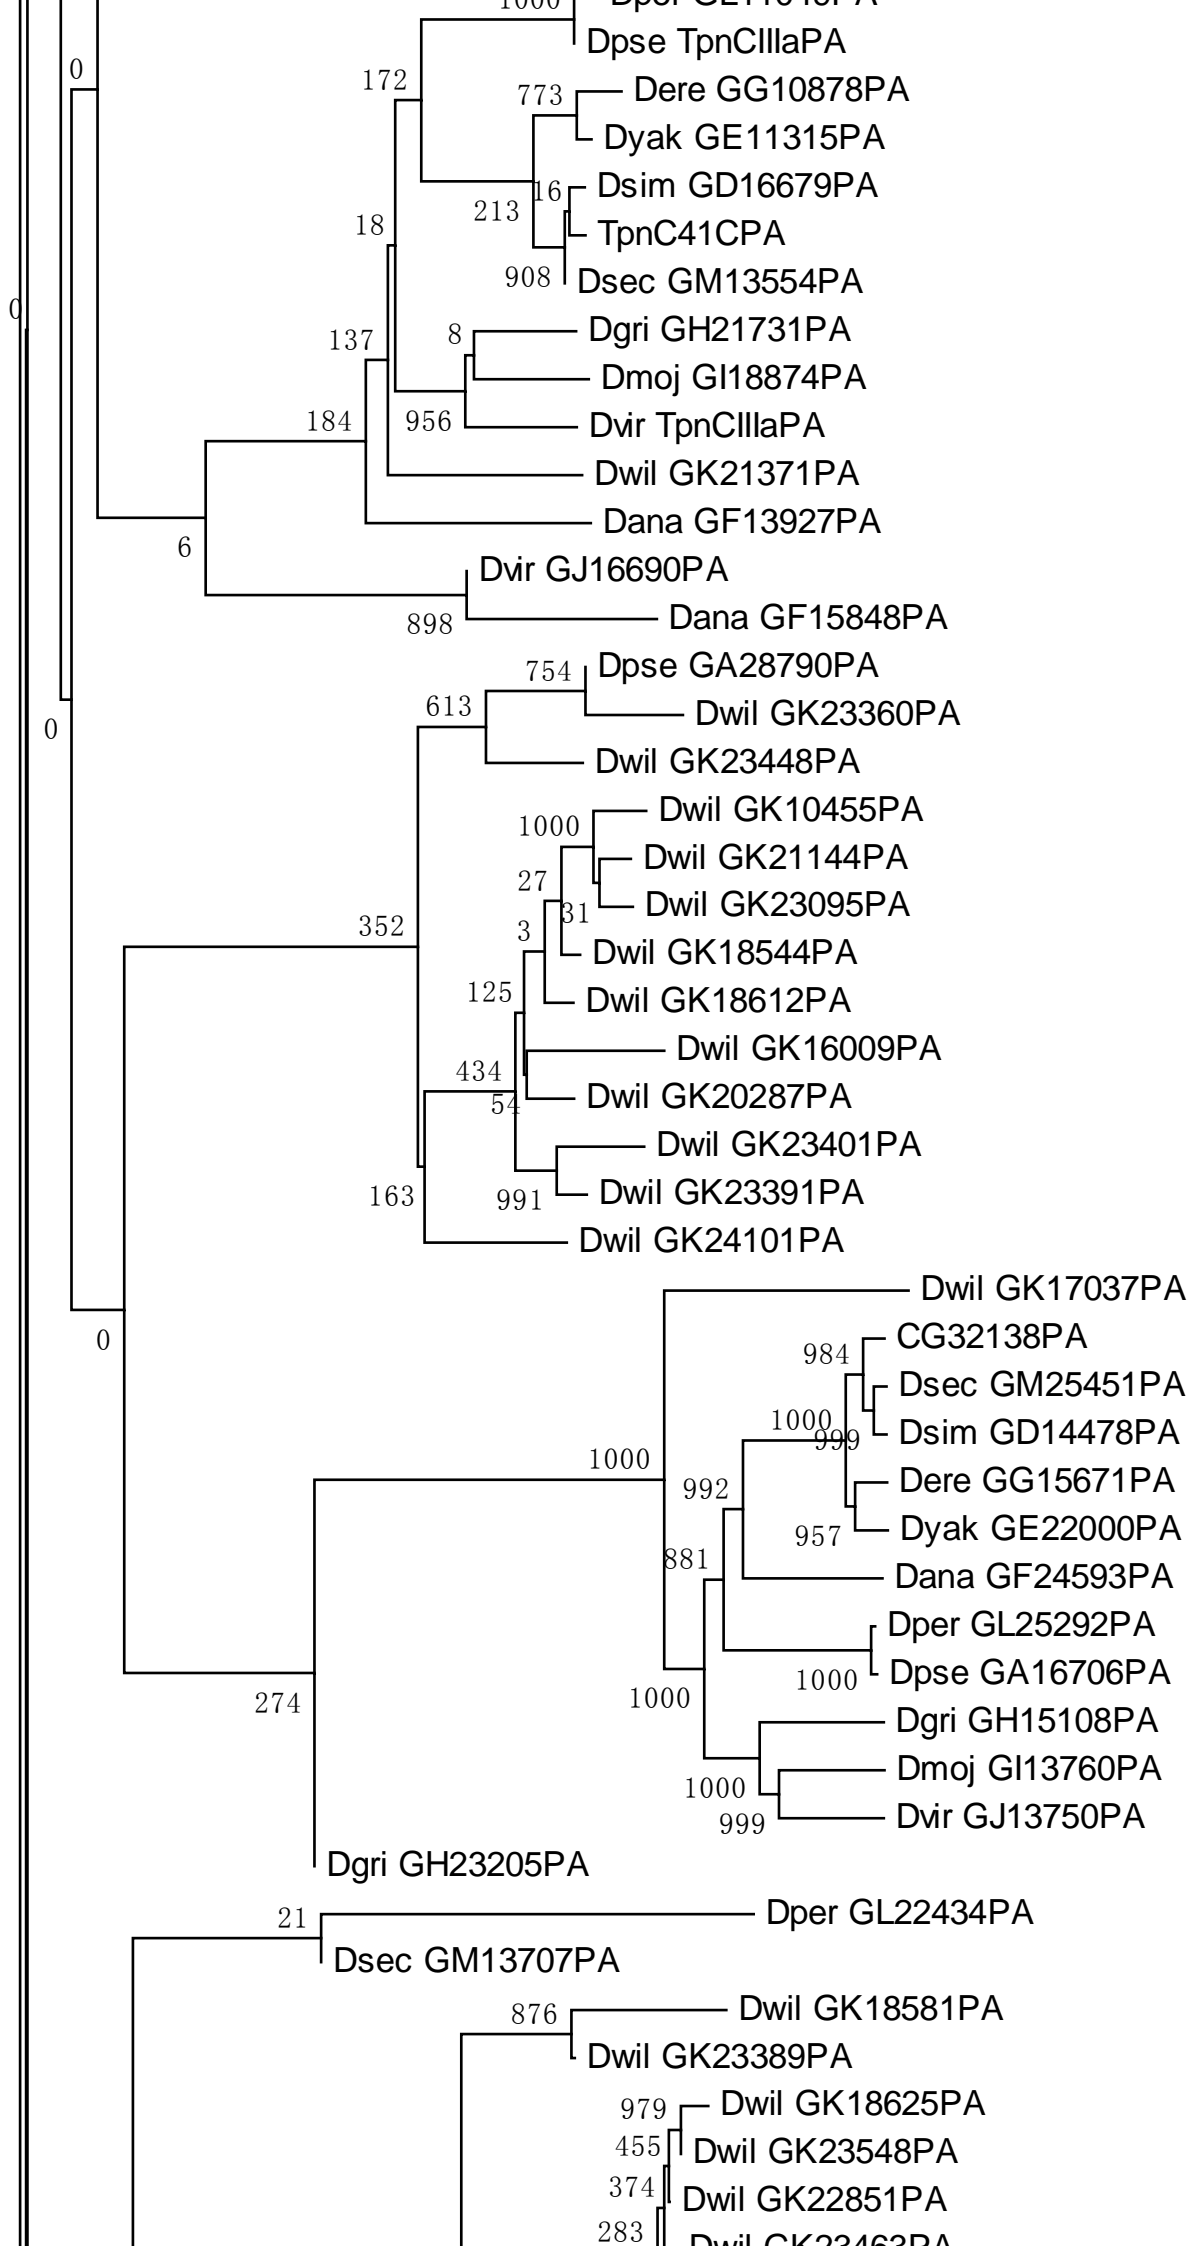



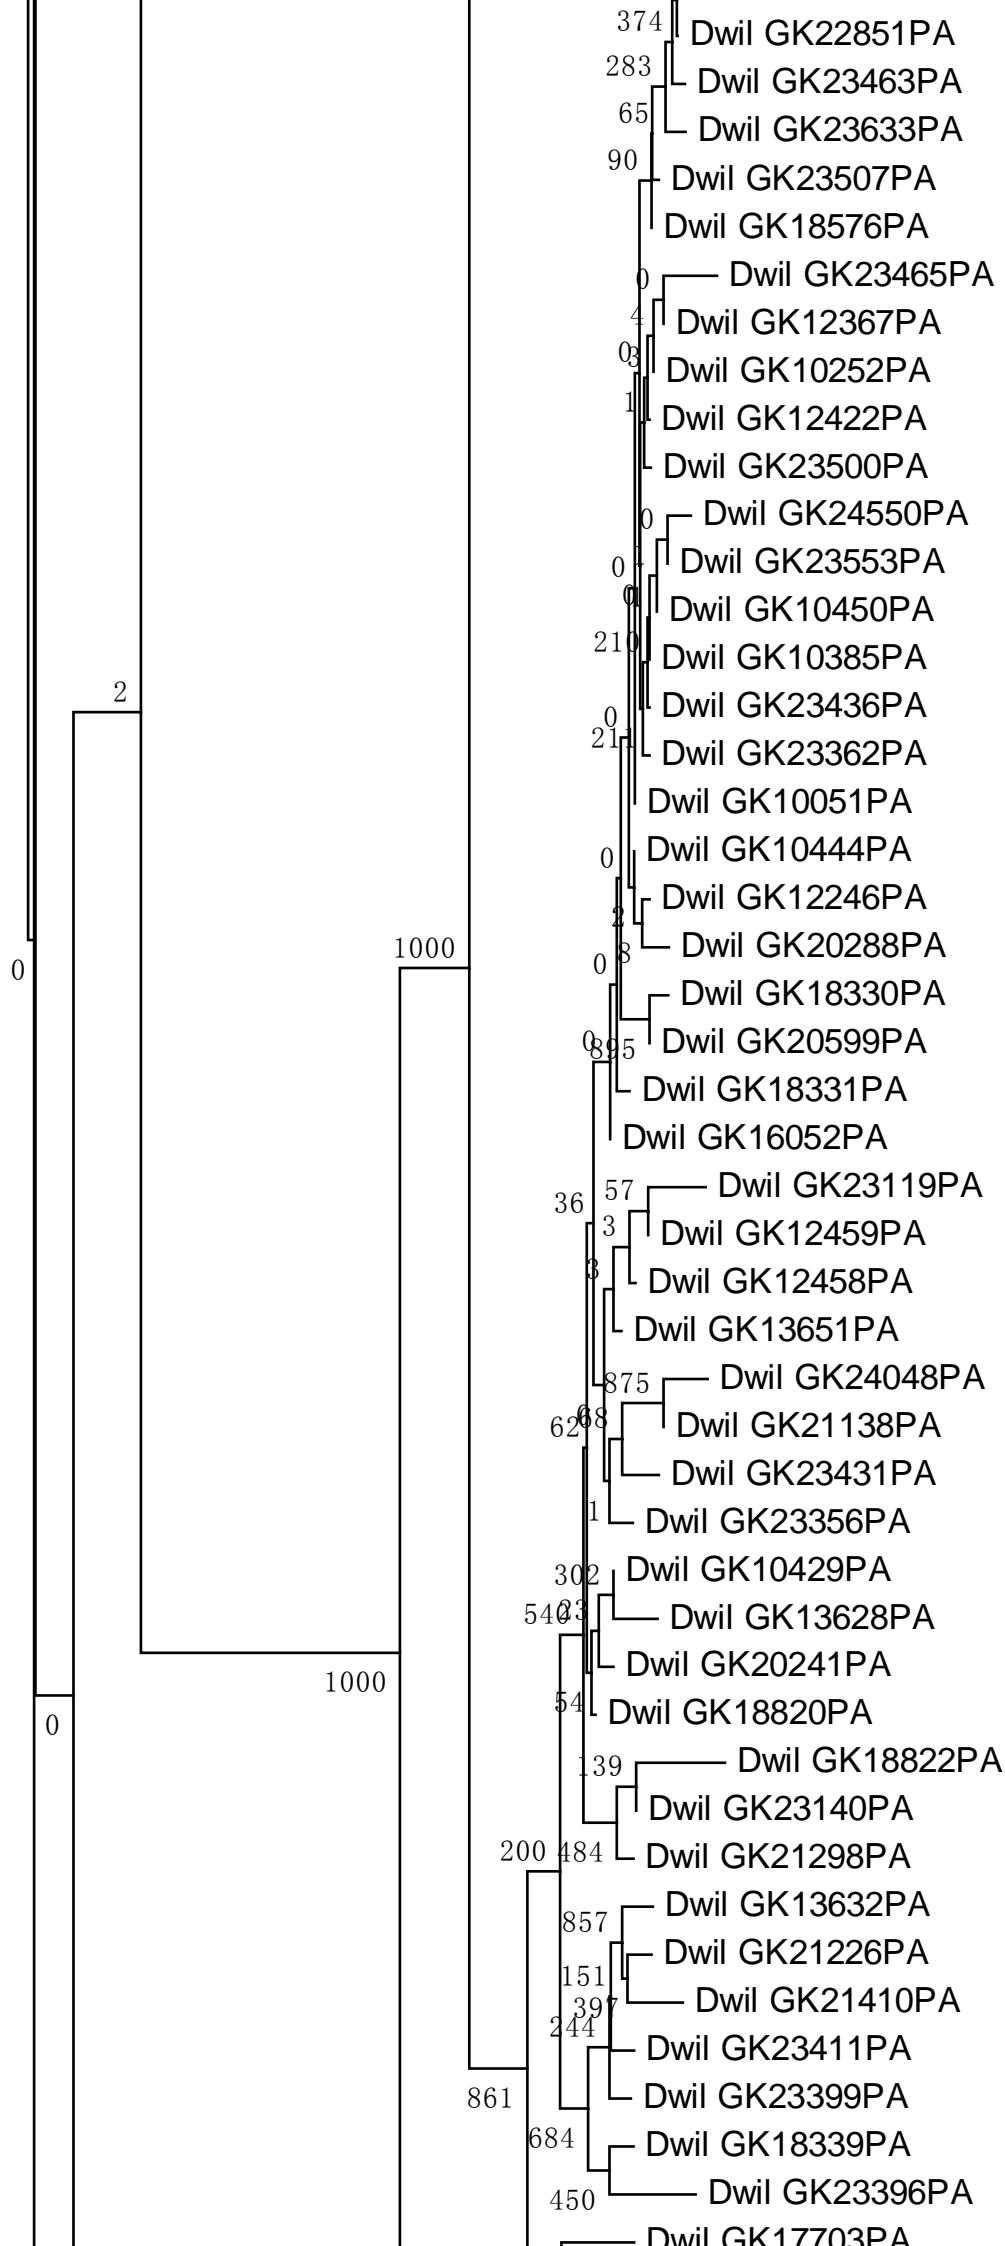

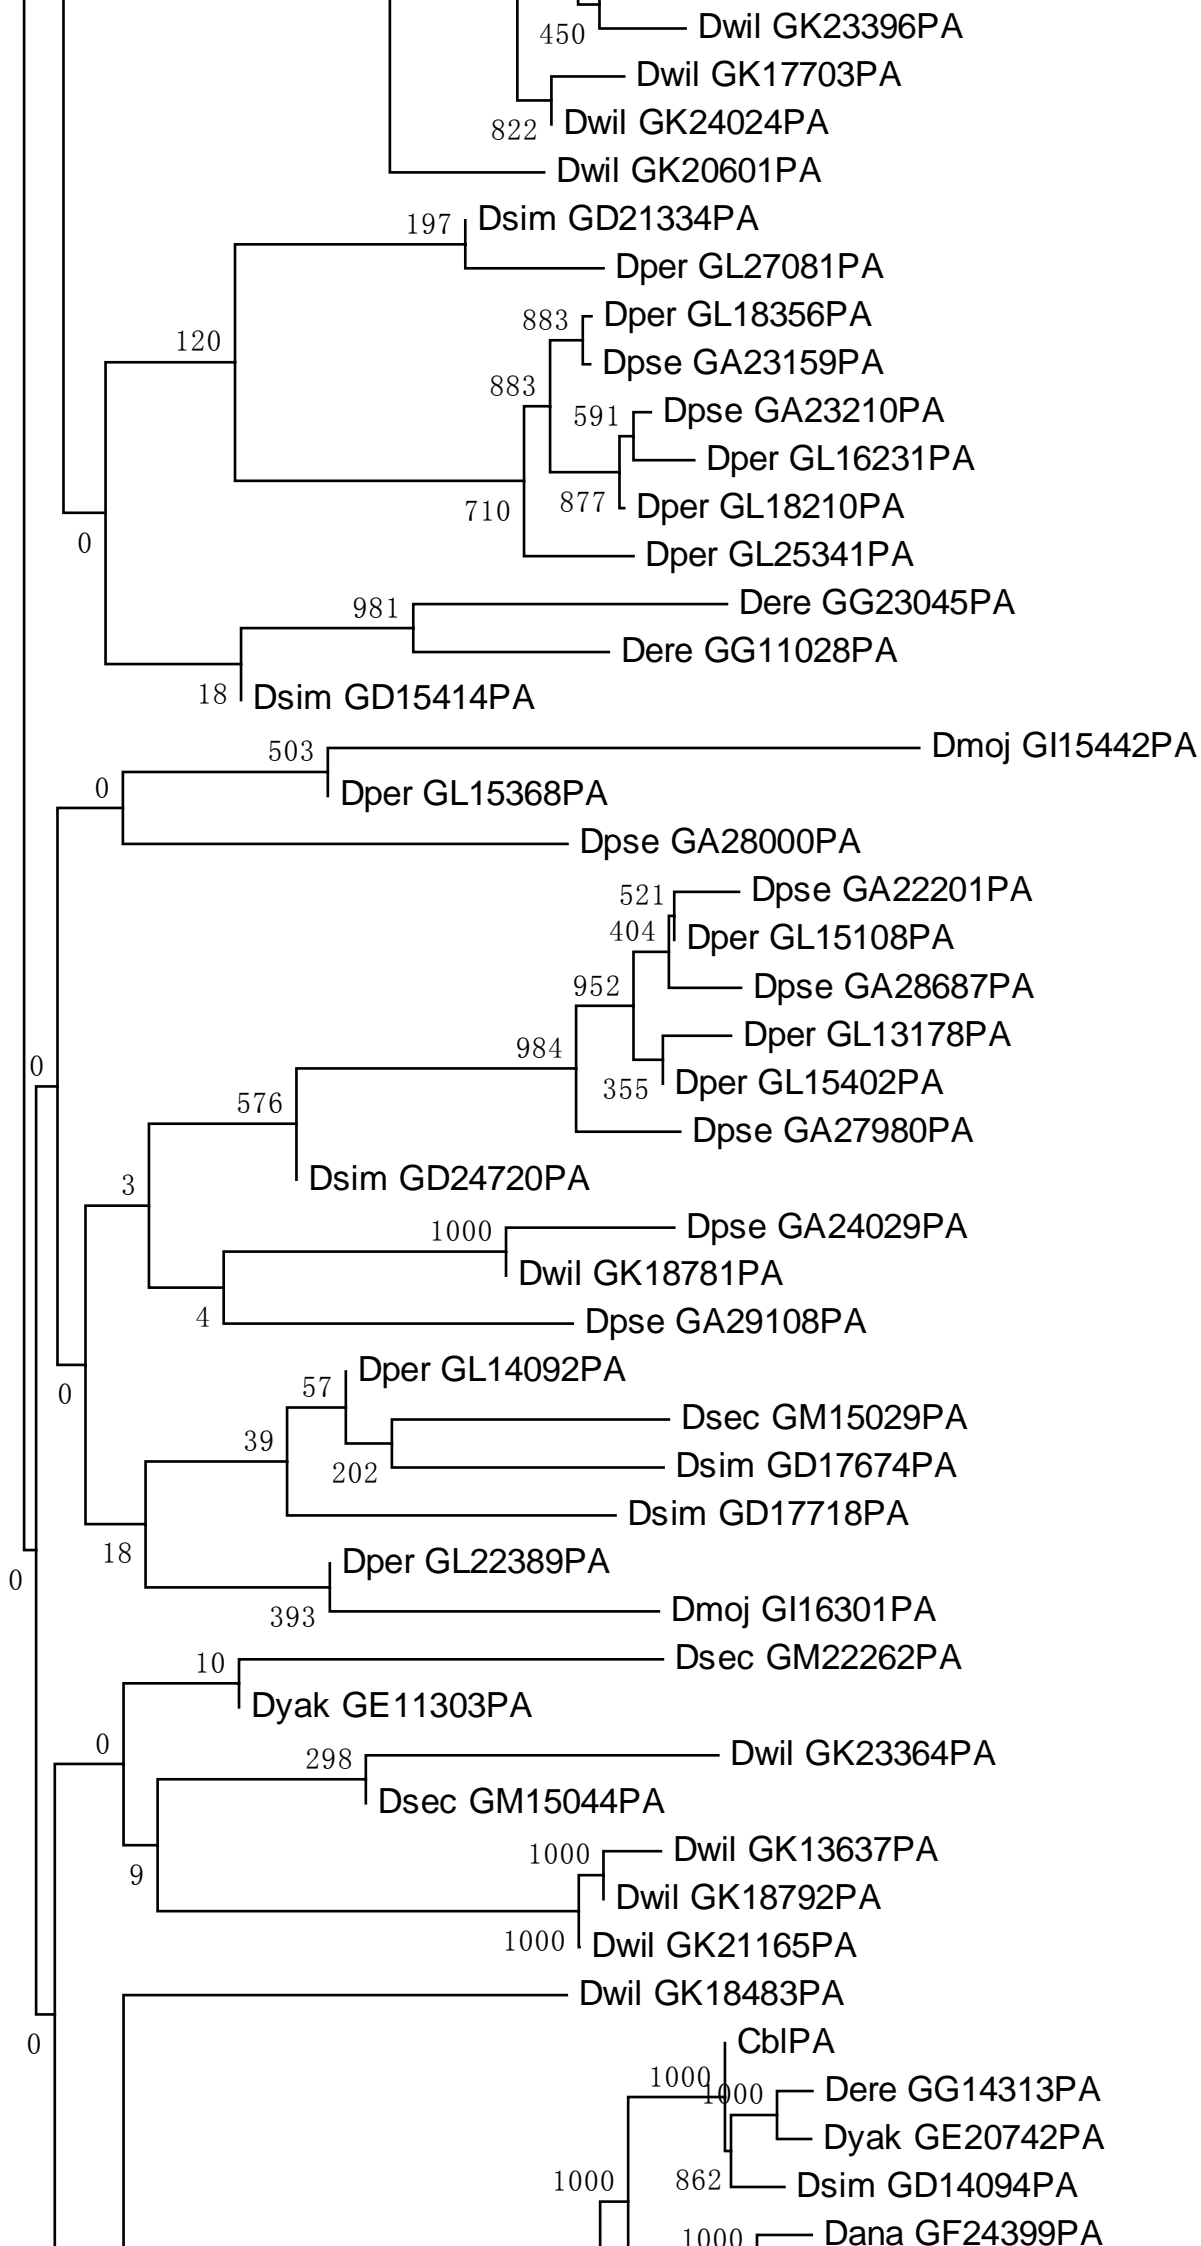

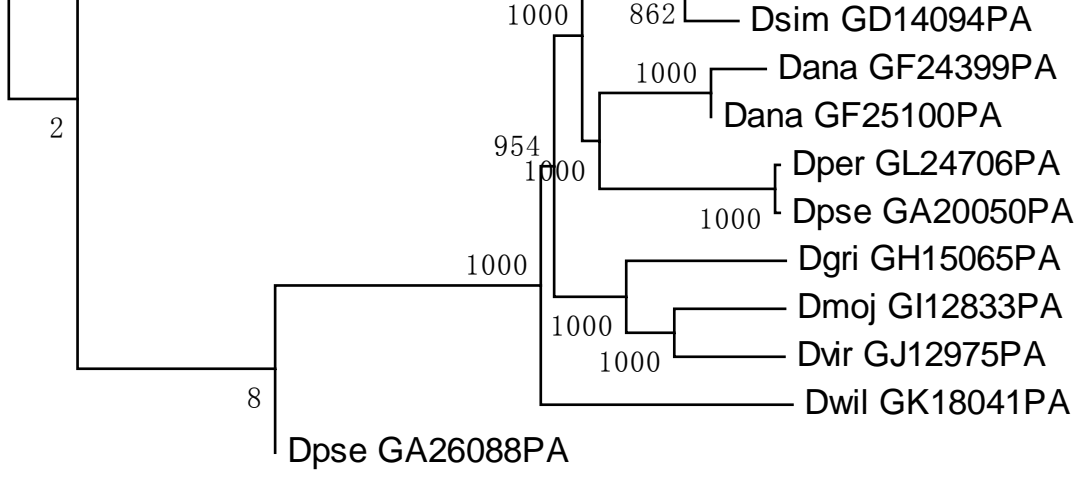

0.05

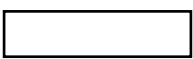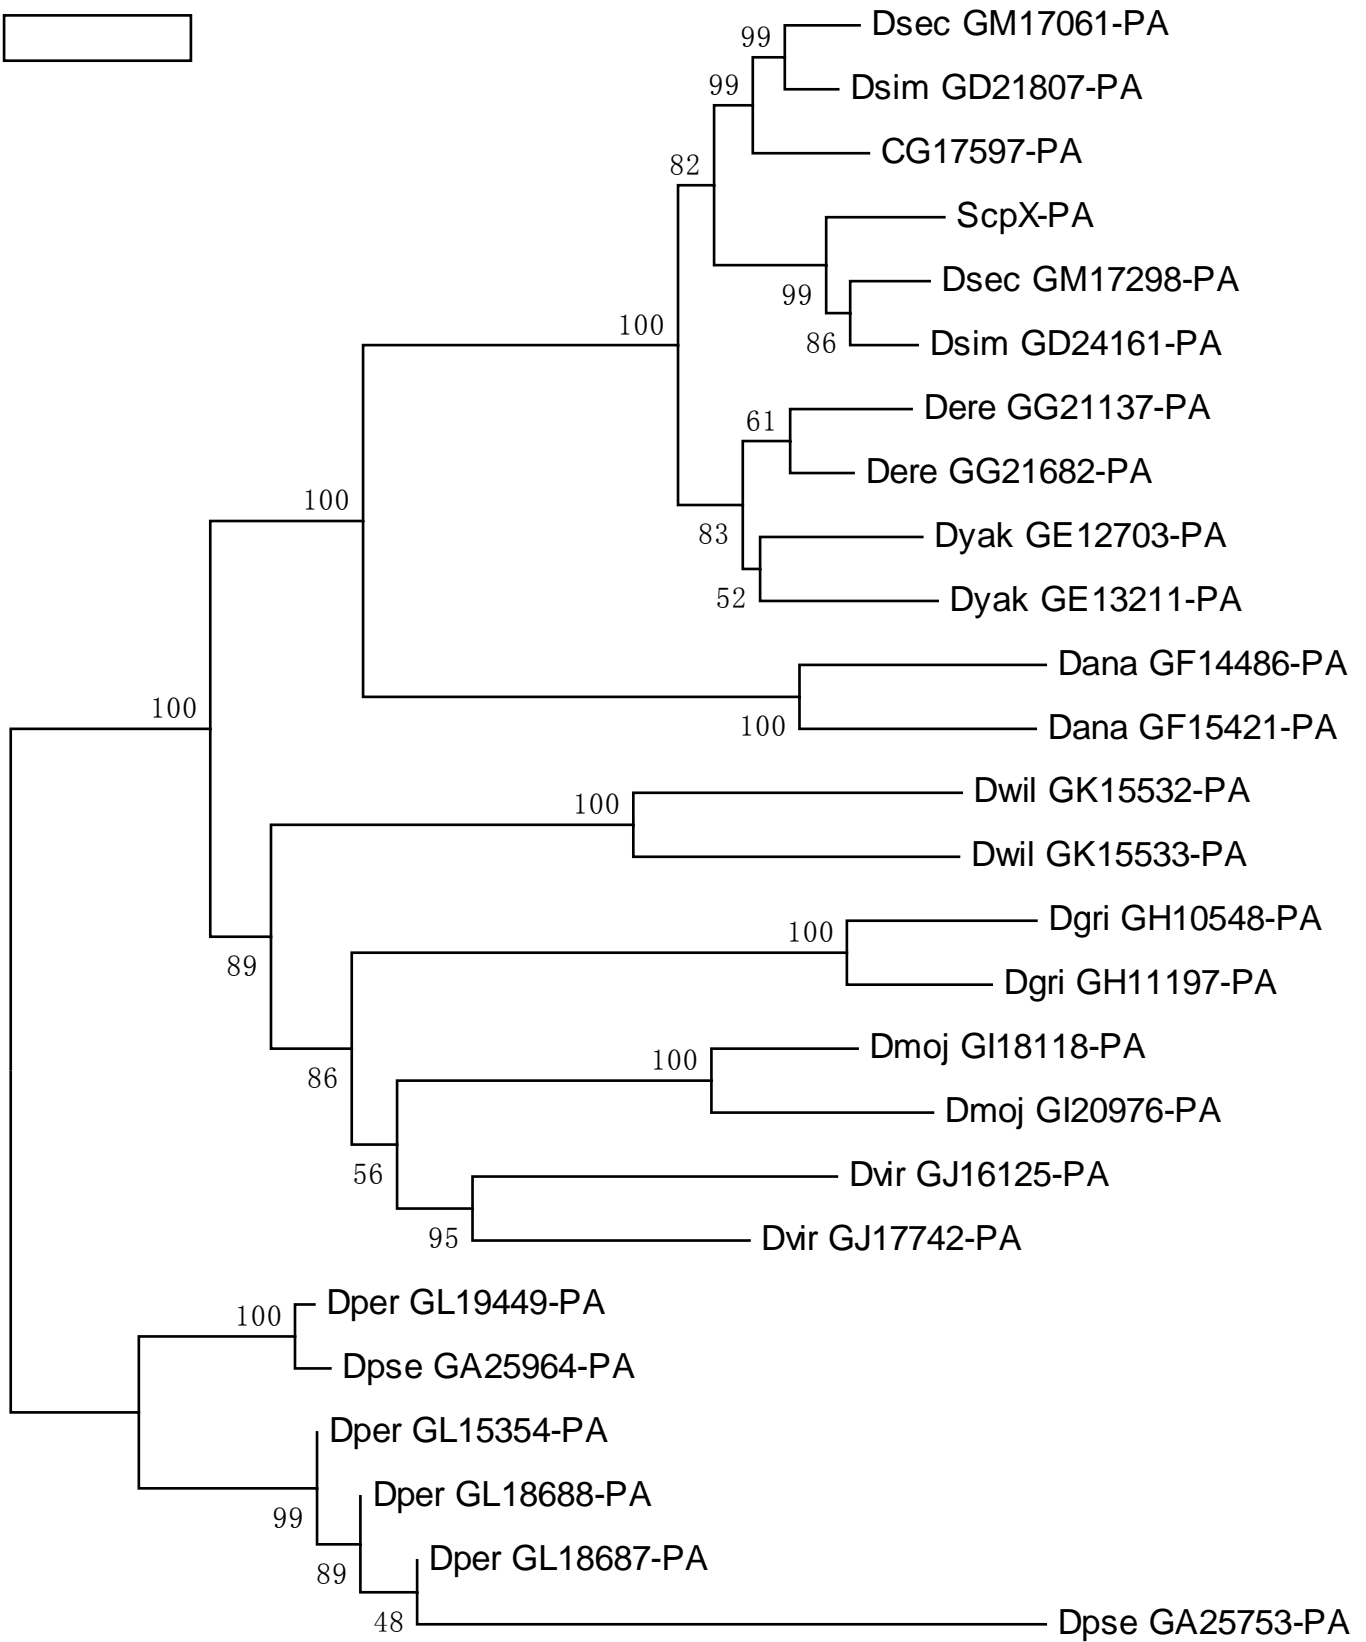

0.02

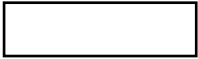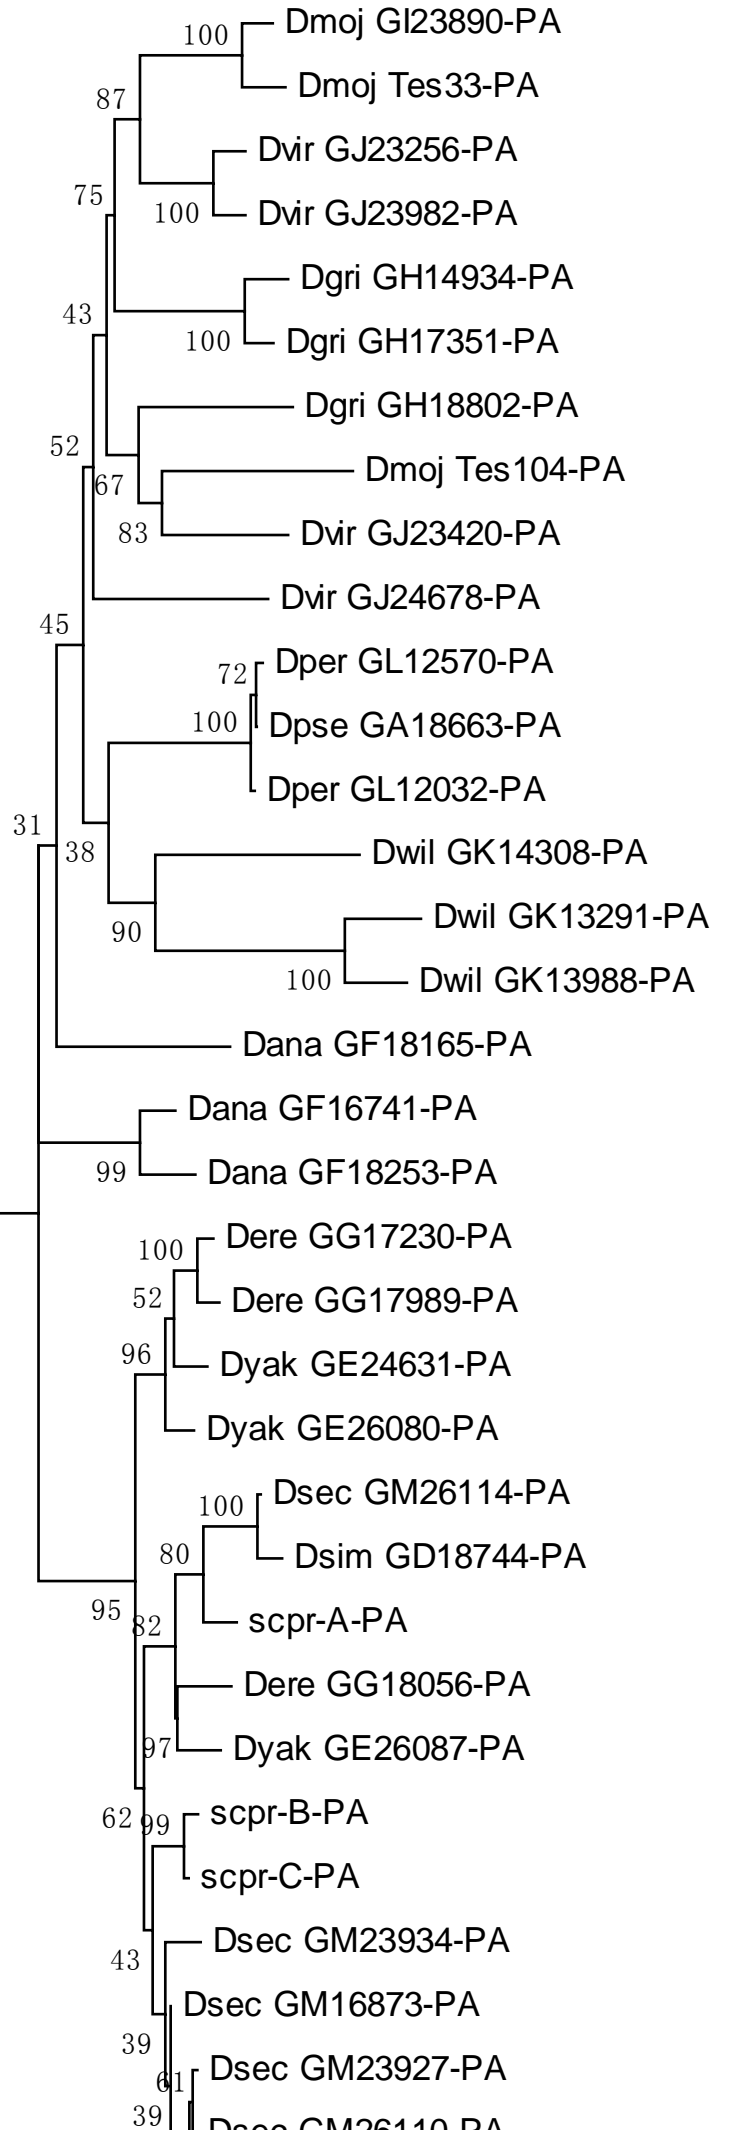

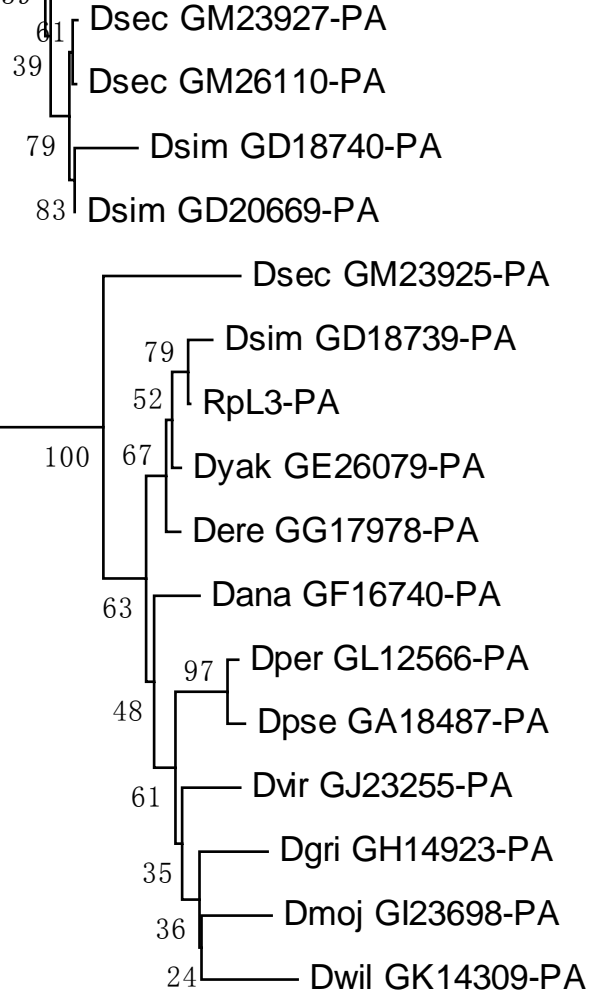

0.05

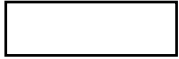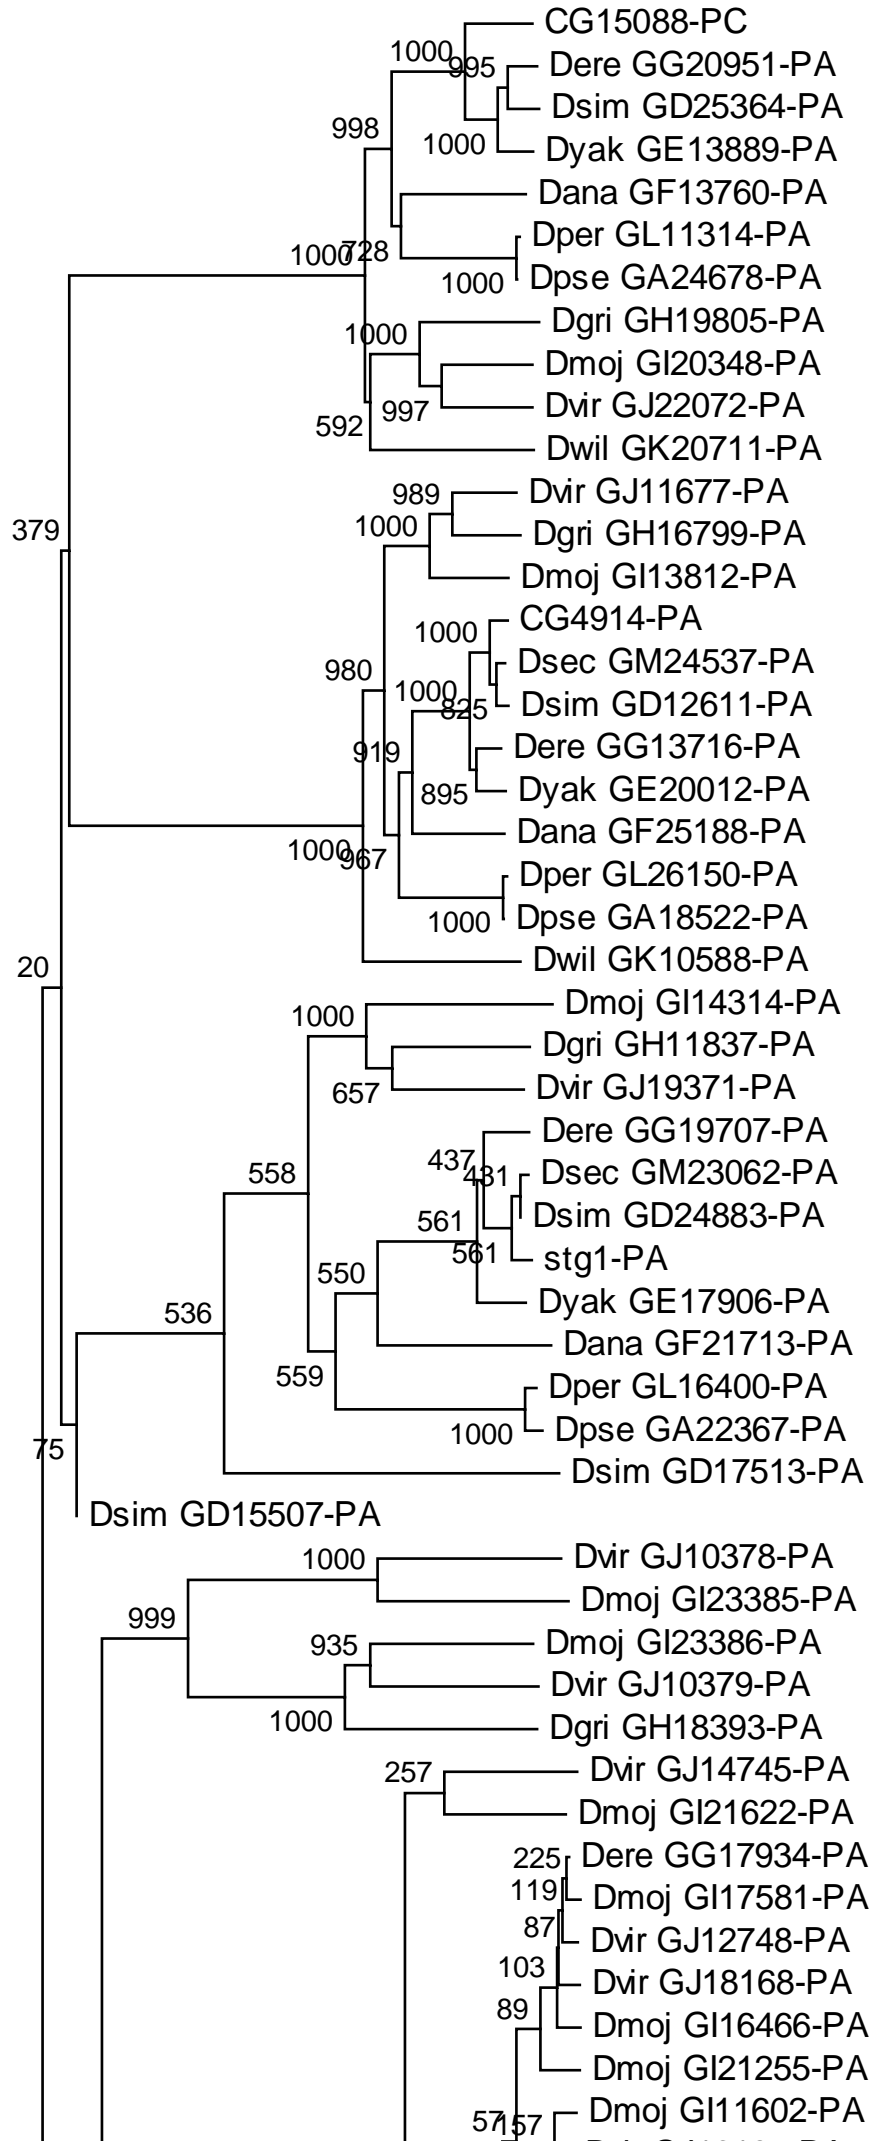

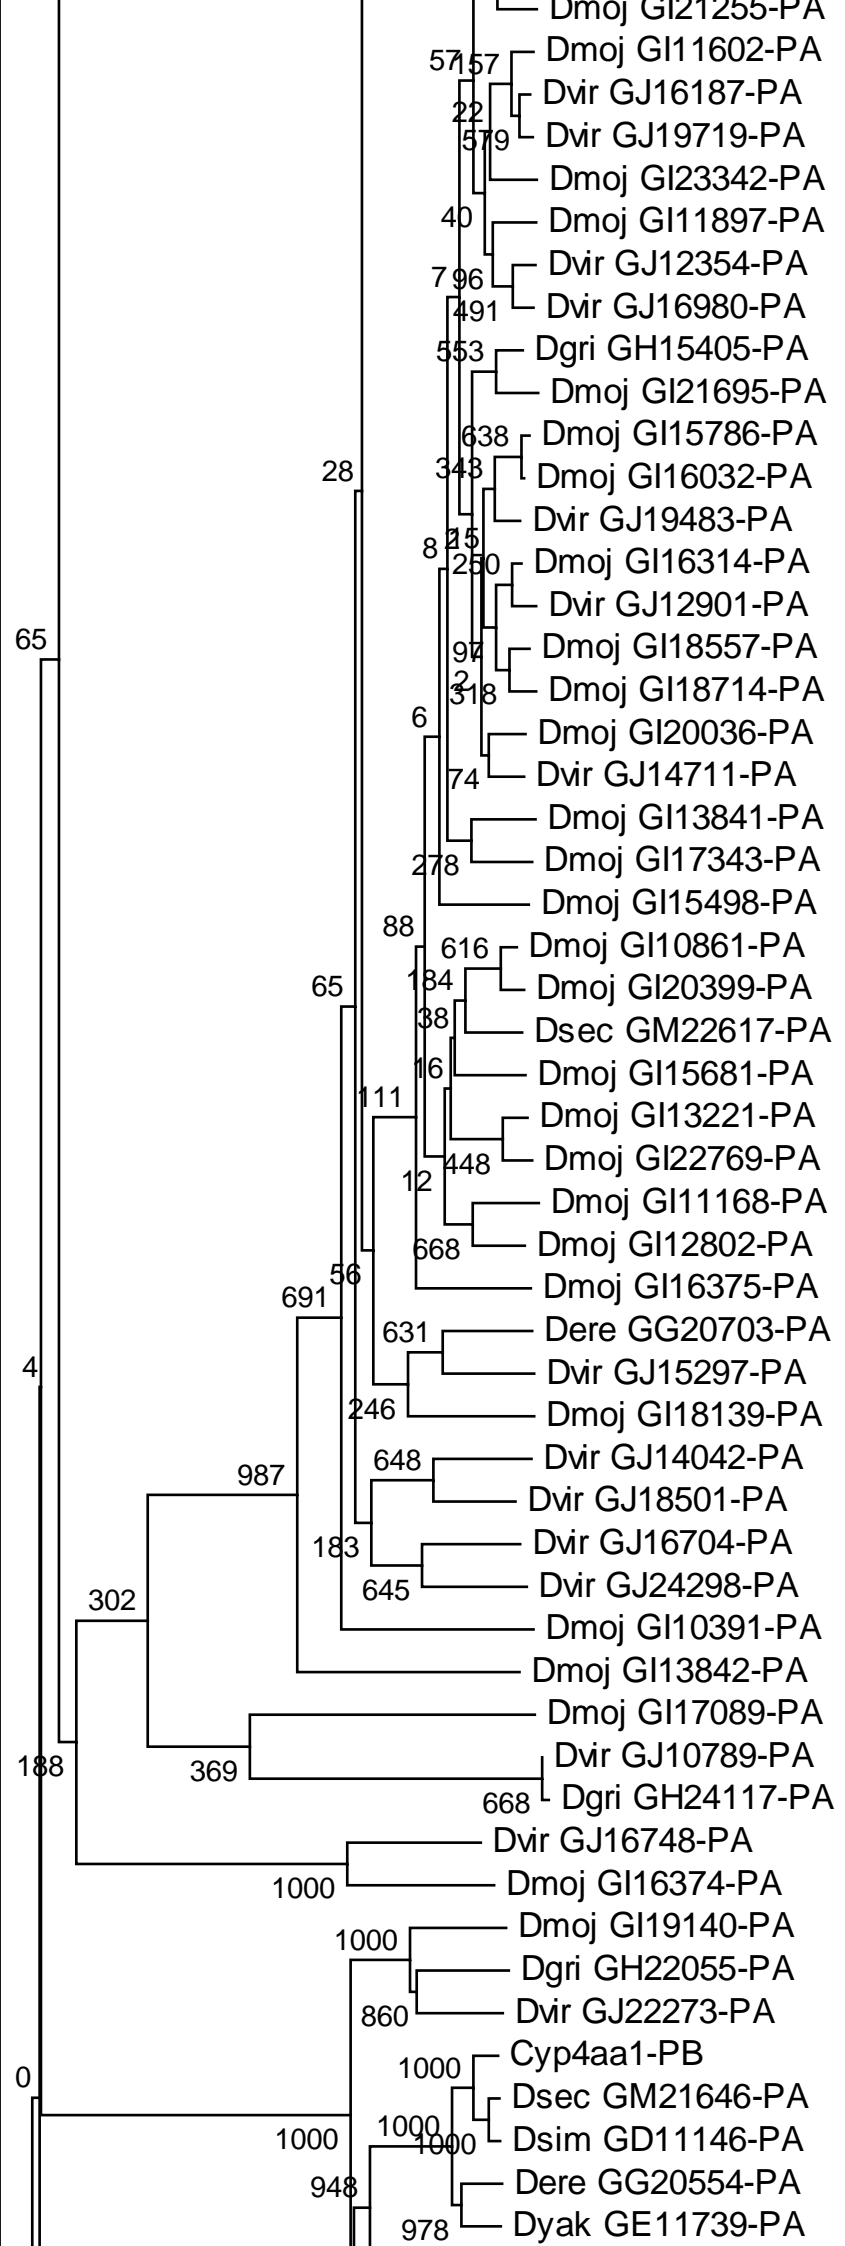





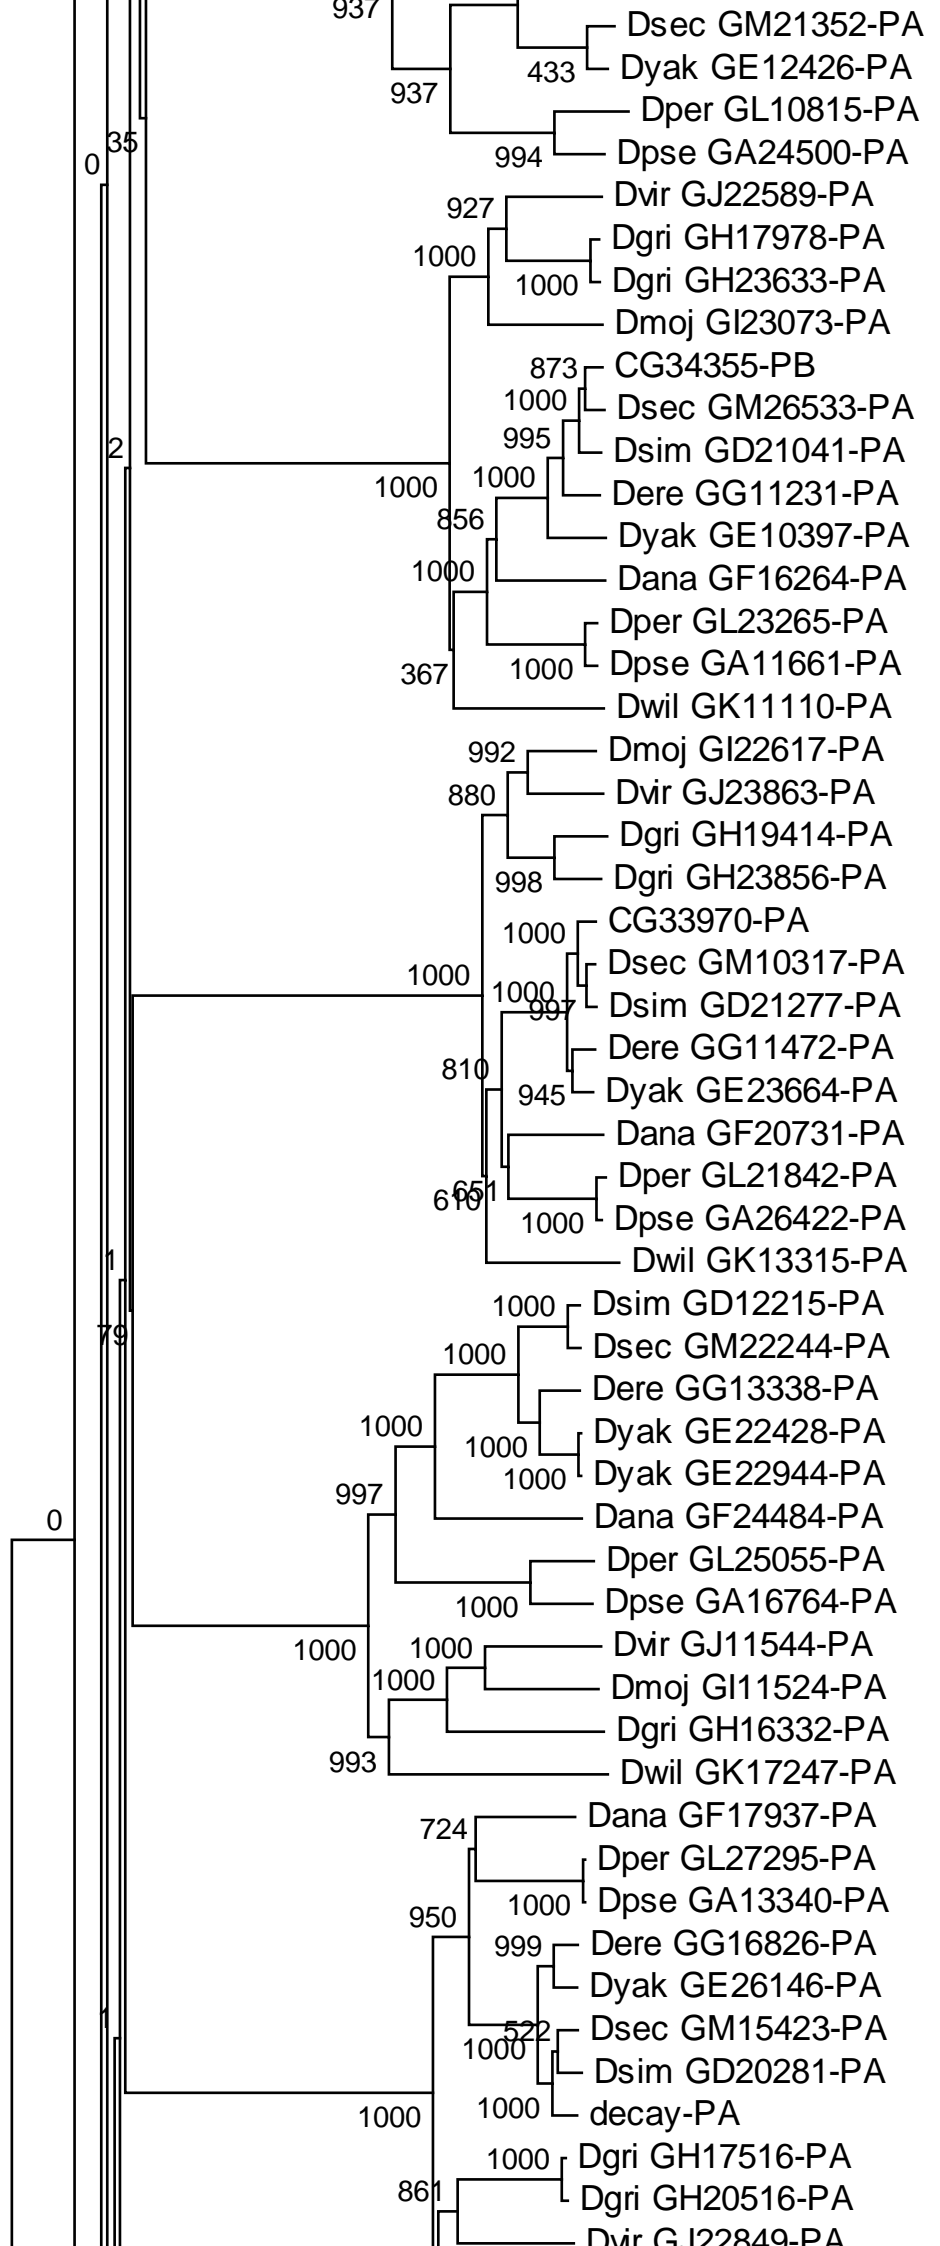

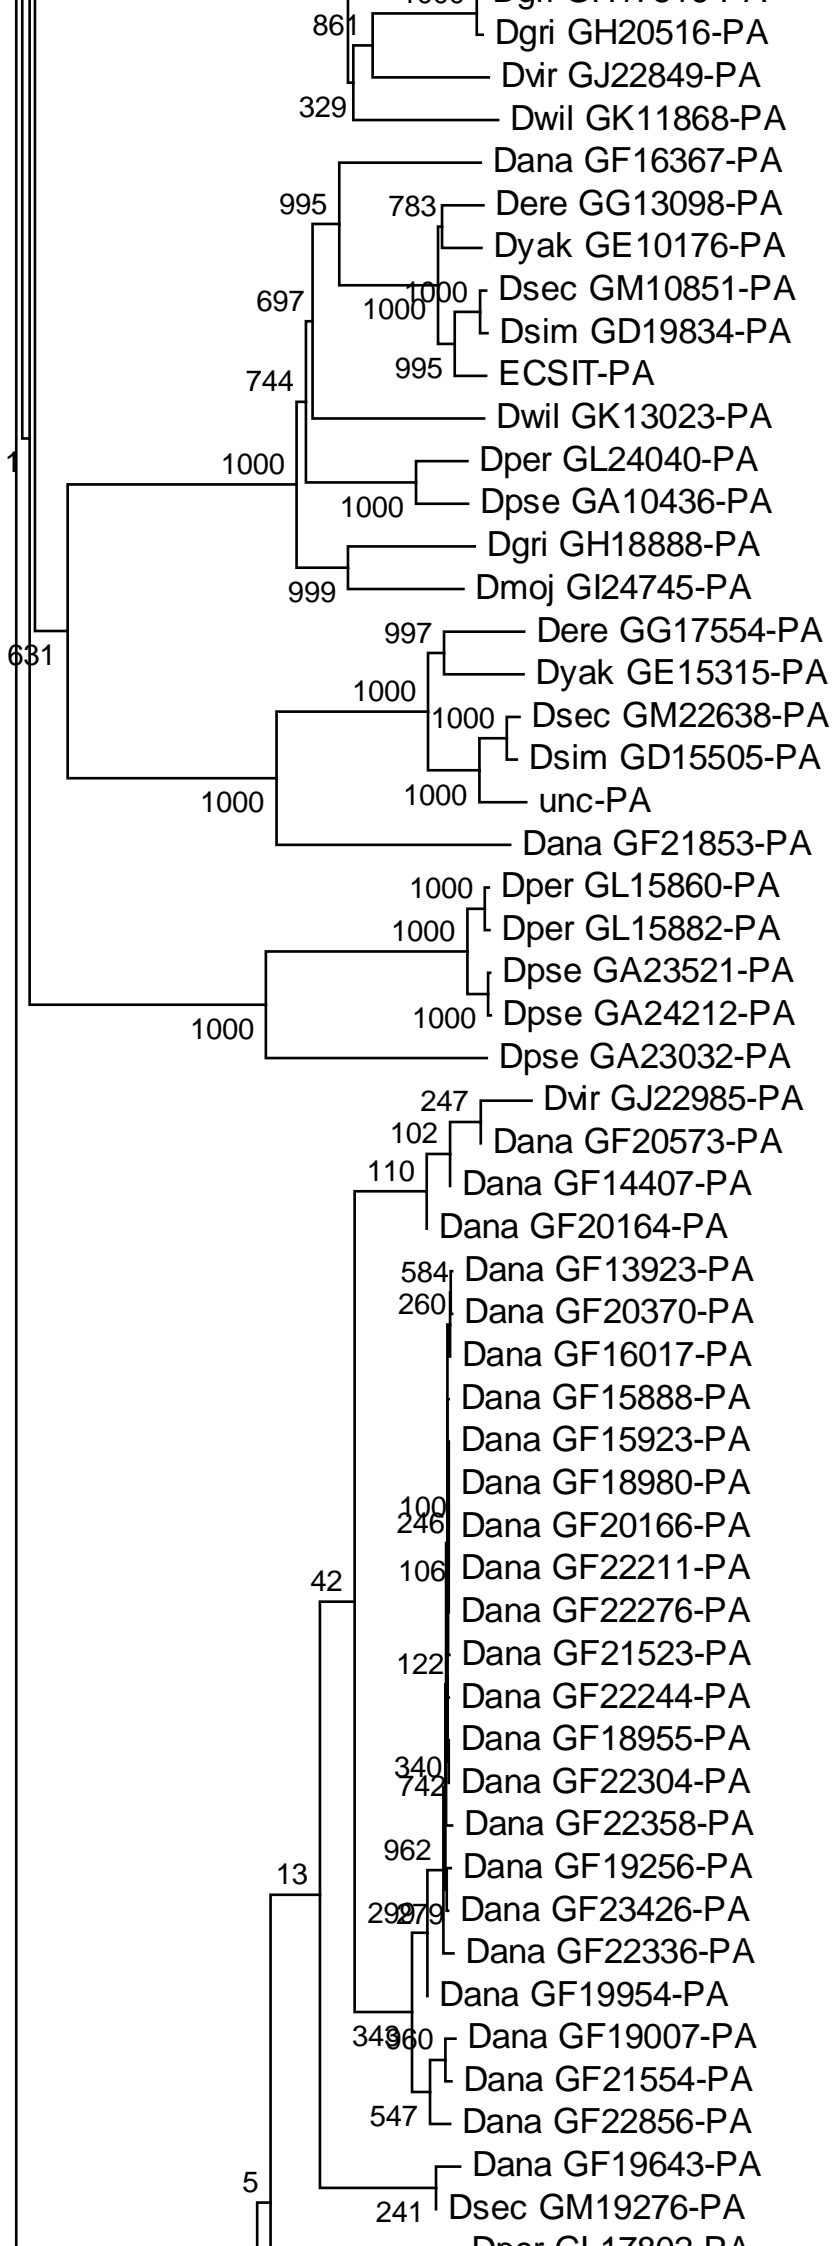

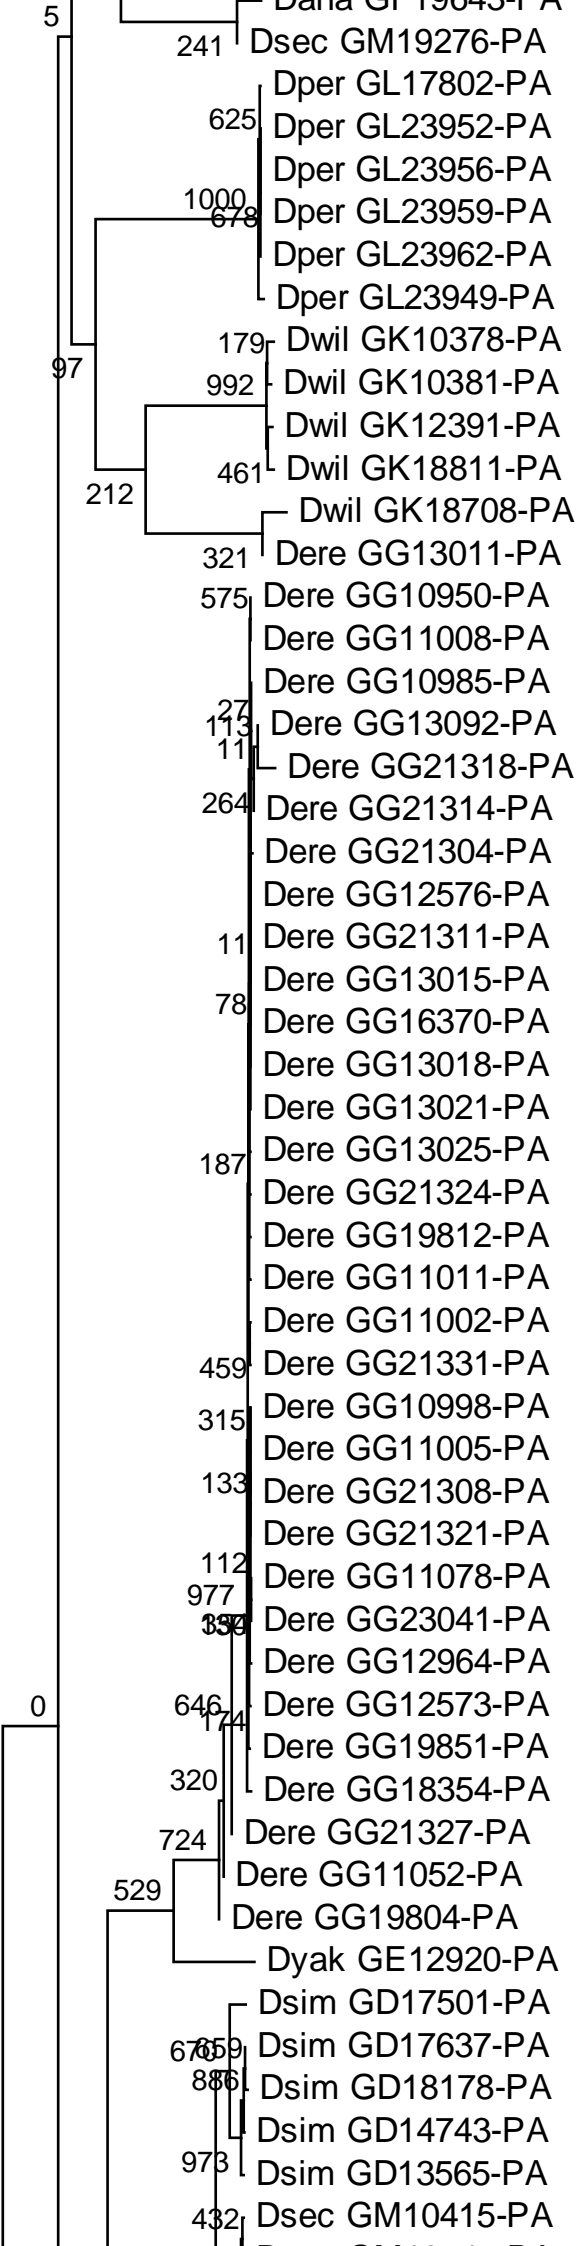

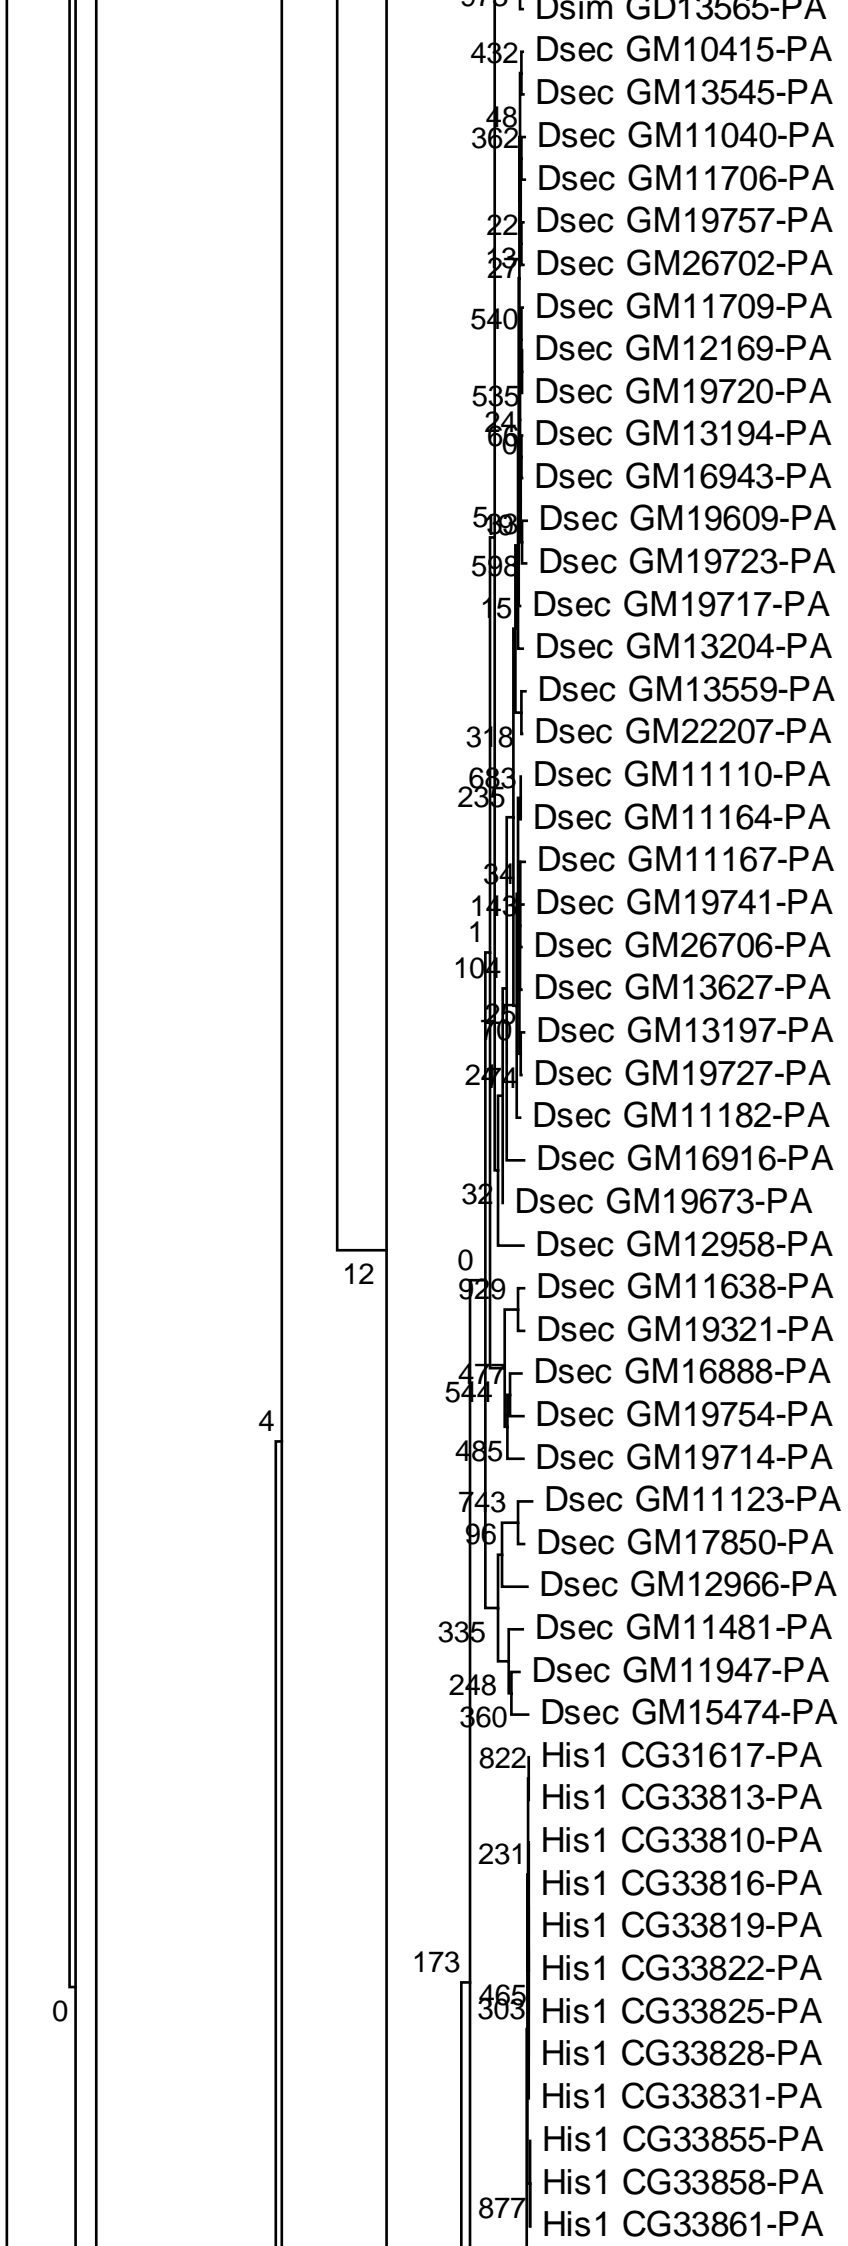

Dsim GD13565-PA  
 432 Dsec GM10415-PA  
 Dsec GM13545-PA  
 48  
 362 Dsec GM11040-PA  
 Dsec GM11706-PA  
 22 Dsec GM19757-PA  
 27 Dsec GM26702-PA  
 540 Dsec GM11709-PA  
 Dsec GM12169-PA  
 535 Dsec GM19720-PA  
 24  
 60 Dsec GM13194-PA  
 Dsec GM16943-PA  
 533 Dsec GM19609-PA  
 598 Dsec GM19723-PA  
 15 Dsec GM19717-PA  
 Dsec GM13204-PA  
 Dsec GM13559-PA  
 318 Dsec GM22207-PA  
 683 Dsec GM11110-PA  
 235 Dsec GM11164-PA  
 Dsec GM11167-PA  
 34  
 143 Dsec GM19741-PA  
 1 Dsec GM26706-PA  
 104 Dsec GM13627-PA  
 25  
 70 Dsec GM13197-PA  
 274 Dsec GM19727-PA  
 Dsec GM11182-PA  
 Dsec GM16916-PA  
 32 Dsec GM19673-PA  
 0 Dsec GM12958-PA  
 12  
 929 Dsec GM11638-PA  
 Dsec GM19321-PA  
 477 Dsec GM16888-PA  
 544 Dsec GM19754-PA  
 485 Dsec GM19714-PA  
 743 Dsec GM11123-PA  
 96 Dsec GM17850-PA  
 Dsec GM12966-PA  
 335 Dsec GM11481-PA  
 248 Dsec GM11947-PA  
 360 Dsec GM15474-PA  
 822 His1 CG31617-PA  
 His1 CG33813-PA  
 231 His1 CG33810-PA  
 His1 CG33816-PA  
 His1 CG33819-PA  
 173 His1 CG33822-PA  
 465  
 303 His1 CG33825-PA  
 His1 CG33828-PA  
 His1 CG33831-PA  
 His1 CG33855-PA  
 His1 CG33858-PA  
 877 His1 CG33861-PA

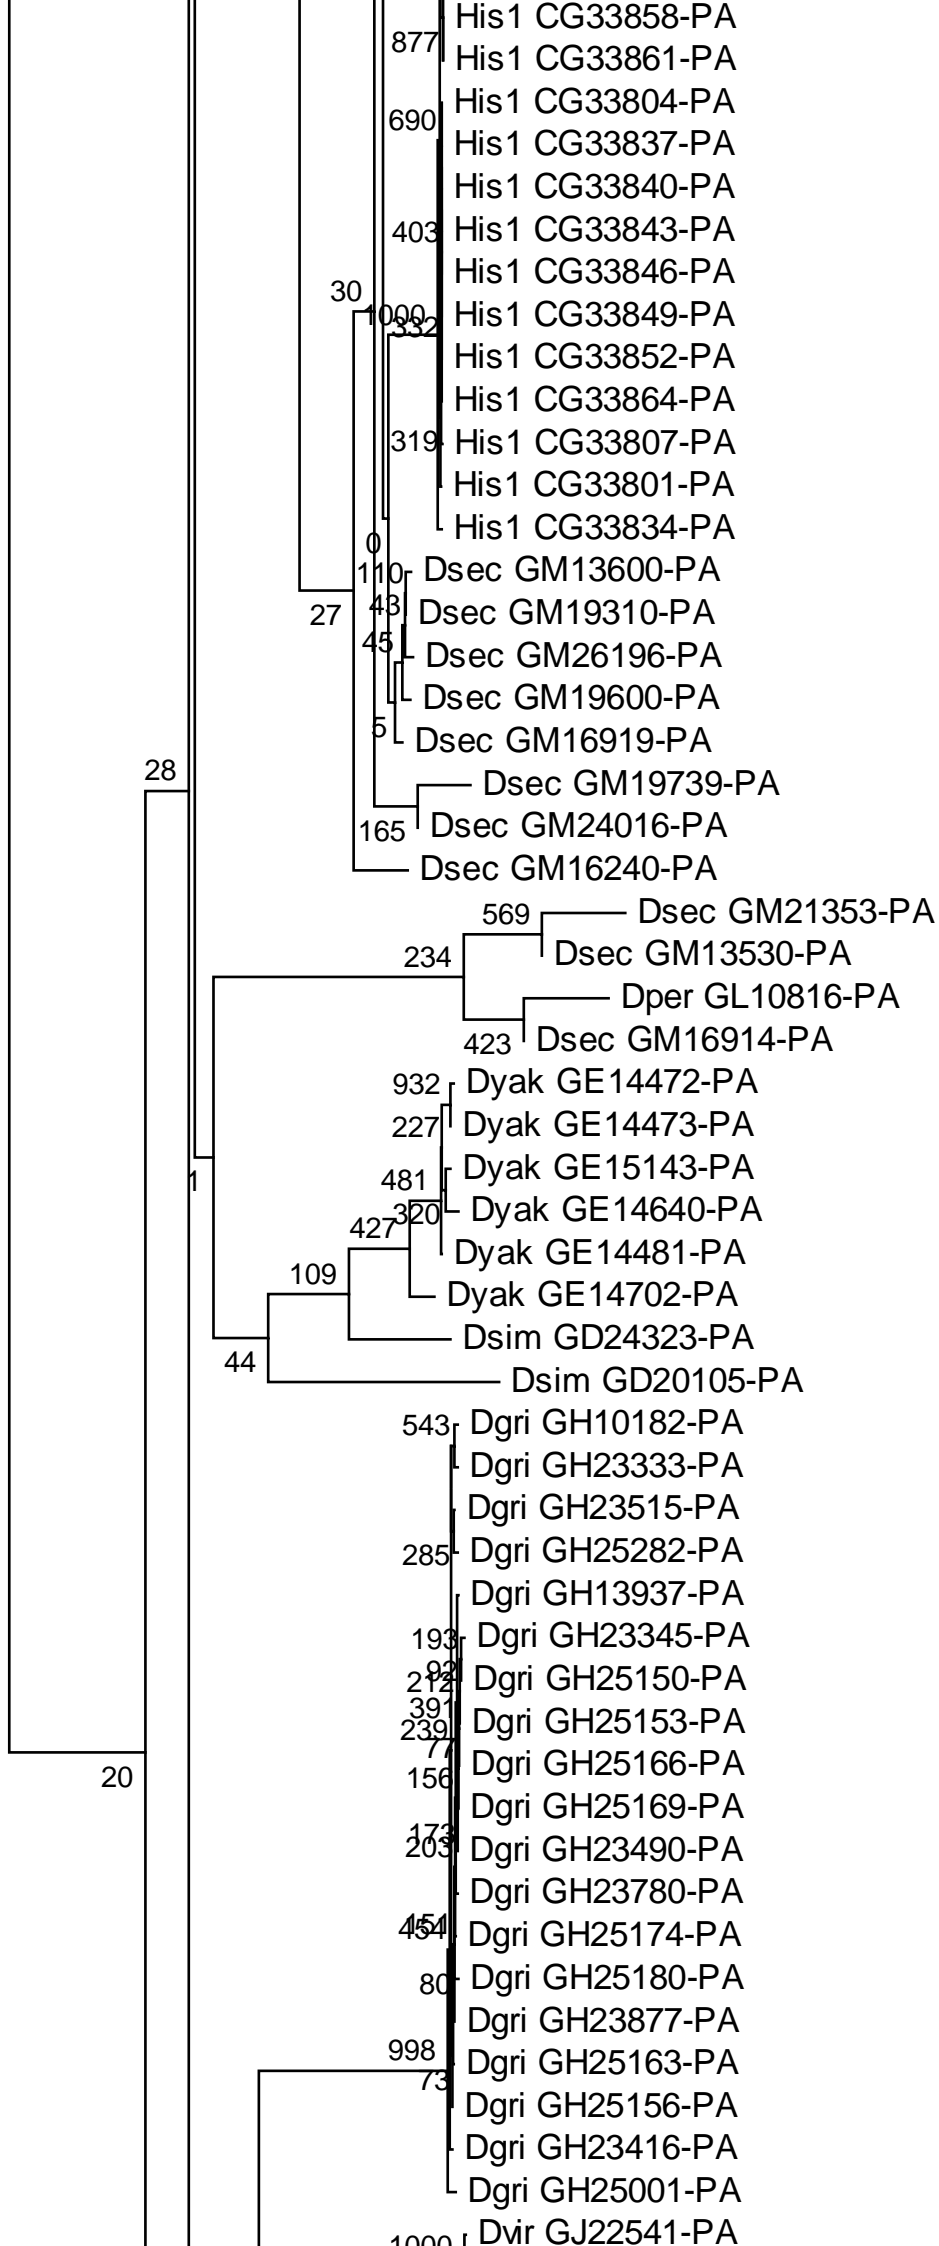

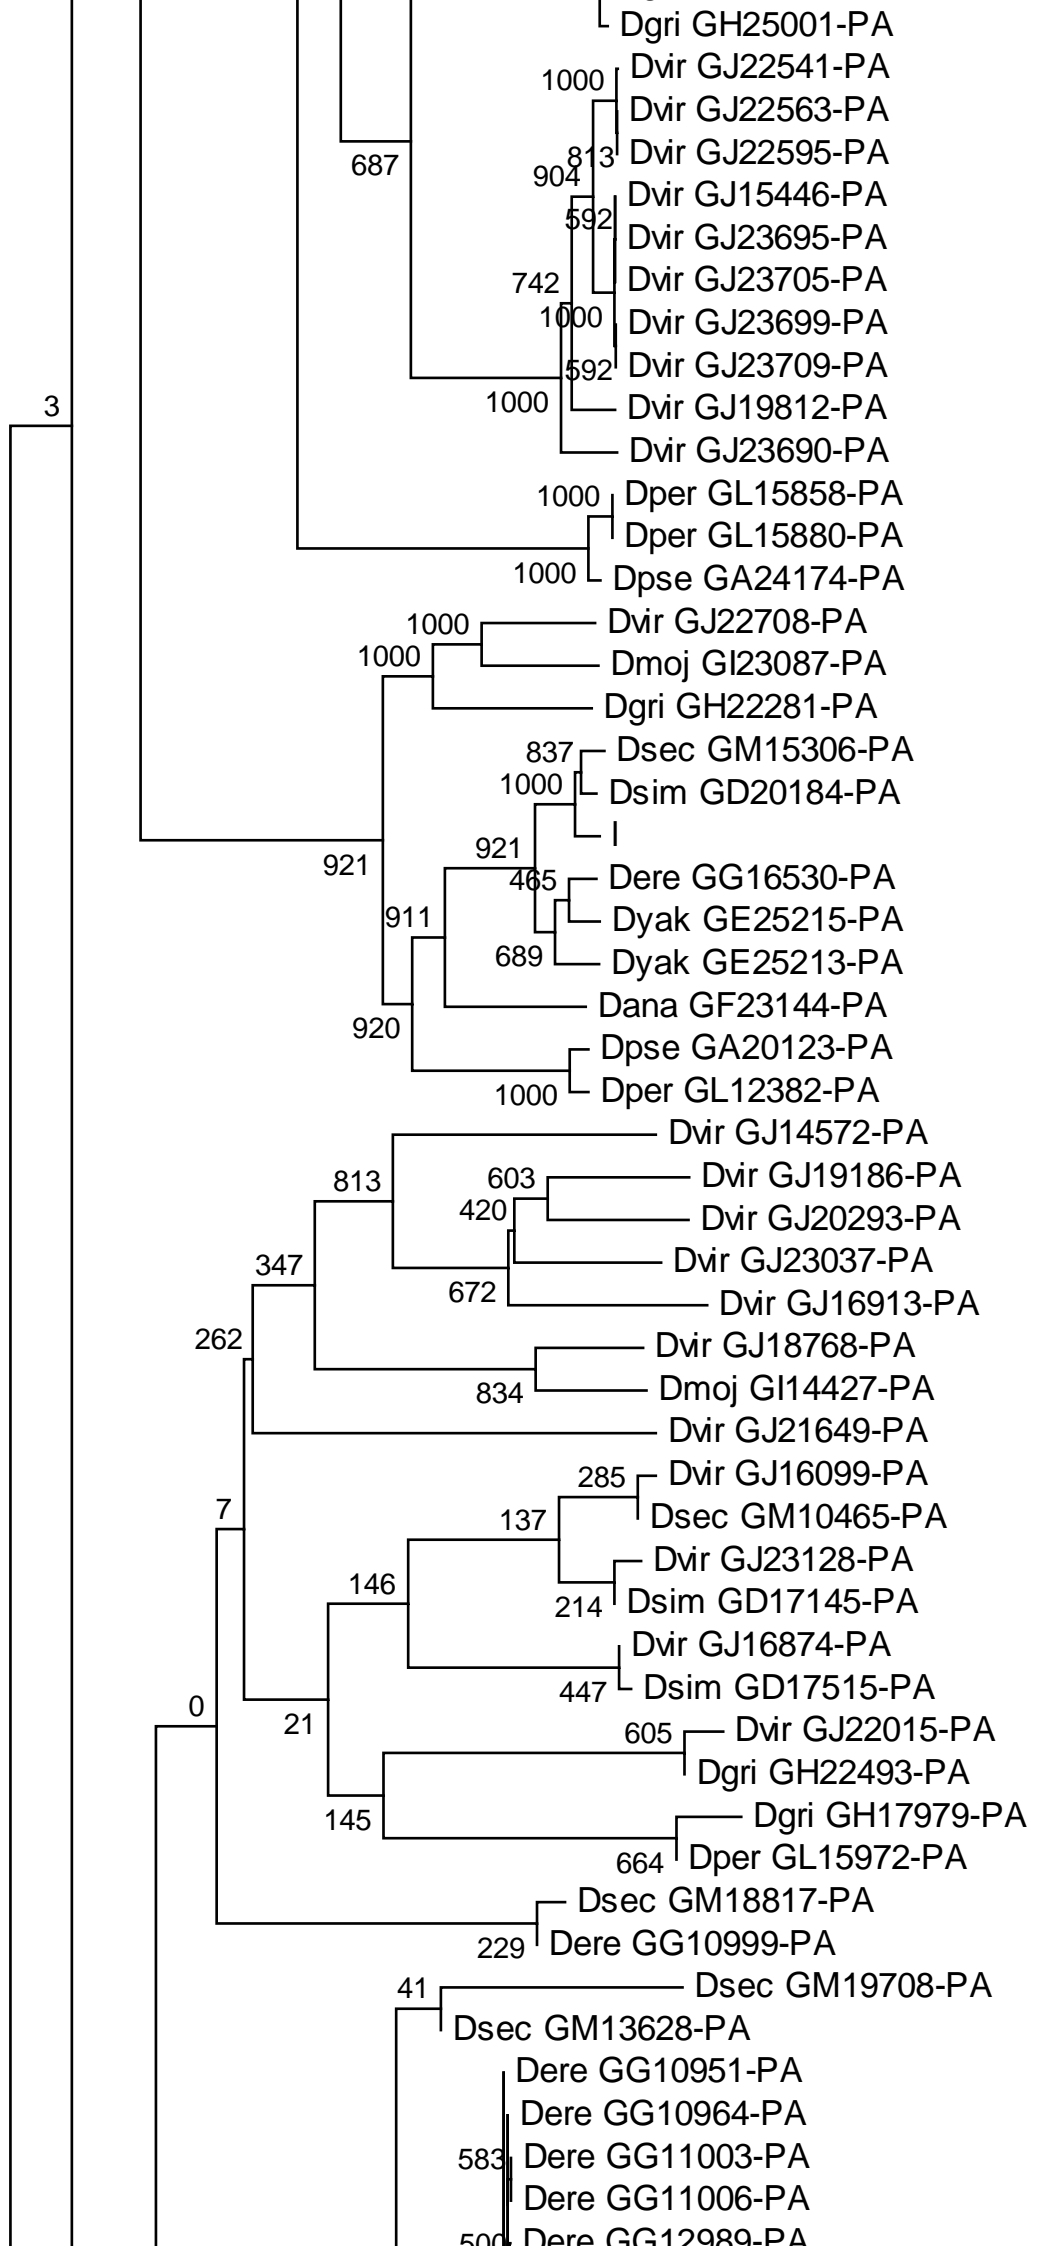

|     |                 |
|-----|-----------------|
|     | Dere GG11006-PA |
| 500 | Dere GG12989-PA |
|     | Dere GG16349-PA |
| 225 | Dere GG19840-PA |
|     | Dere GG11009-PA |
|     | Dere GG21322-PA |
|     | Dere GG12574-PA |
|     | Dere GG12577-PA |
|     | Dere GG13022-PA |
| 400 | Dere GG13026-PA |
|     | Dere GG21319-PA |
|     | Dere GG18133-PA |
| 291 | Dere GG18465-PA |
|     | Dere GG19797-PA |
|     | Dere GG19829-PA |
|     | Dere GG19849-PA |
|     | Dere GG19852-PA |
|     | Dere GG21305-PA |
|     | Dere GG21309-PA |
|     | Dere GG21312-PA |
| 689 | Dere GG11013-PA |
|     | Dere GG13016-PA |
|     | Dere GG13019-PA |
|     | Dere GG13060-PA |
| 244 | Dere GG21332-PA |
|     | Dere GG21315-PA |
|     | Dere GG16371-PA |
| 131 | Dere GG19786-PA |
|     | Dere GG13013-PA |
| 547 | Dere GG21329-PA |
| 810 | Dere GG21325-PA |
|     | Dere GG12954-PA |
| 561 | Dere GG21335-PA |
|     | Dyak GE14574-PA |
| 694 | Dyak GE14578-PA |
| 515 | Dyak GE15127-PA |
| 869 | Dyak GE15142-PA |
| 402 | Dyak GE14995-PA |
|     | Dsec GM10574-PA |
| 440 | Dsec GM19715-PA |
| 37  | Dsec GM22048-PA |
| 16  | Dsec GM22645-PA |
|     | Dsec GM22499-PA |
|     | Dsec GM22145-PA |
|     | Dsec GM21848-PA |
|     | Dsec GM11111-PA |
|     | Dsec GM11168-PA |
|     | Dsec GM11180-PA |
|     | Dsec GM20018-PA |
|     | Dsec GM19728-PA |
|     | Dsec GM11651-PA |
|     | Dsec GM19725-PA |
|     | Dsec GM11707-PA |

3



Dsec GM11651-PA  
Dsec GM11707-PA  
Dsec GM19718-PA  
Dsec GM11710-PA  
Dsec GM19610-PA  
Dsec GM13169-PA  
4 Dsec GM11993-PA  
Dsec GM12072-PA  
Dsec GM12275-PA  
Dsec GM12951-PA  
Dsec GM19441-PA  
Dsec GM19350-PA  
Dsec GM13001-PA  
Dsec GM13195-PA  
Dsec GM19339-PA  
Dsec GM19320-PA  
Dsec GM13214-PA  
4 Dsec GM13526-PA  
Dsec GM18816-PA  
Dsec GM17440-PA  
Dsec GM13546-PA  
Dsec GM13581-PA  
Dsec GM16864-PA  
5 Dsec GM16545-PA  
Dsec GM13613-PA  
Dsec GM16390-PA  
11 Dsec GM16231-PA  
Dsec GM16186-PA  
Dsec GM19643-PA  
Dsec GM16544-PA  
Dsec GM11183-PA  
Dsim GD12842-PA  
Dsim GD13555-PA  
69 Dsim GD13905-PA  
7 Dsim GD14669-PA  
445 Dsim GD16082-PA  
Dsim GD16944-PA  
109 Dsim GD18538-PA  
75 Dsim GD20328-PA  
Dsim GD20626-PA  
169 Dsim GD24267-PA  
Dsim GD24469-PA  
14 Dsim GD15331-PA  
225 Dsim GD24022-PA  
Dsim GD15347-PA  
Dsec GM11712-PA  
Dsec GM13182-PA  
238 Dsec GM16162-PA  
11 Dsec GM16102-PA  
312 Dsec GM19742-PA  
Dsec GM13661-PA  
27 Dsec GM17710-PA  
316

0

4

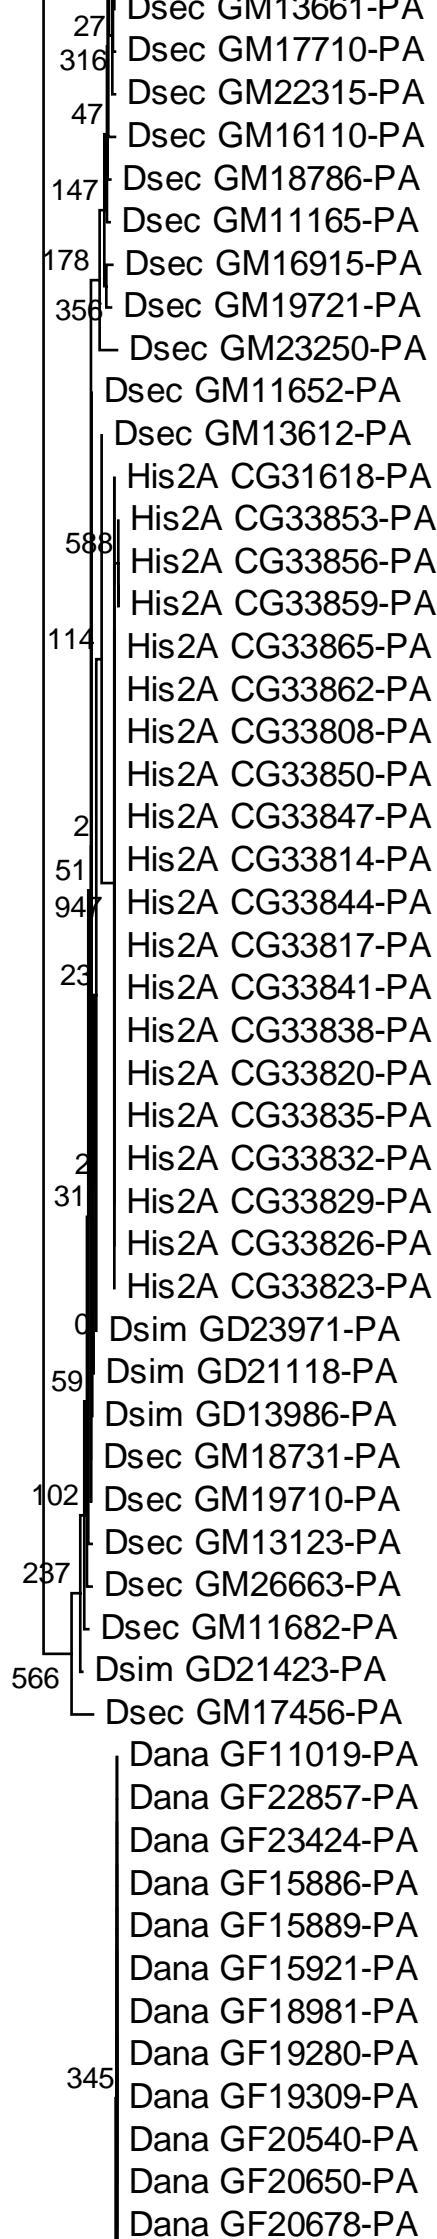

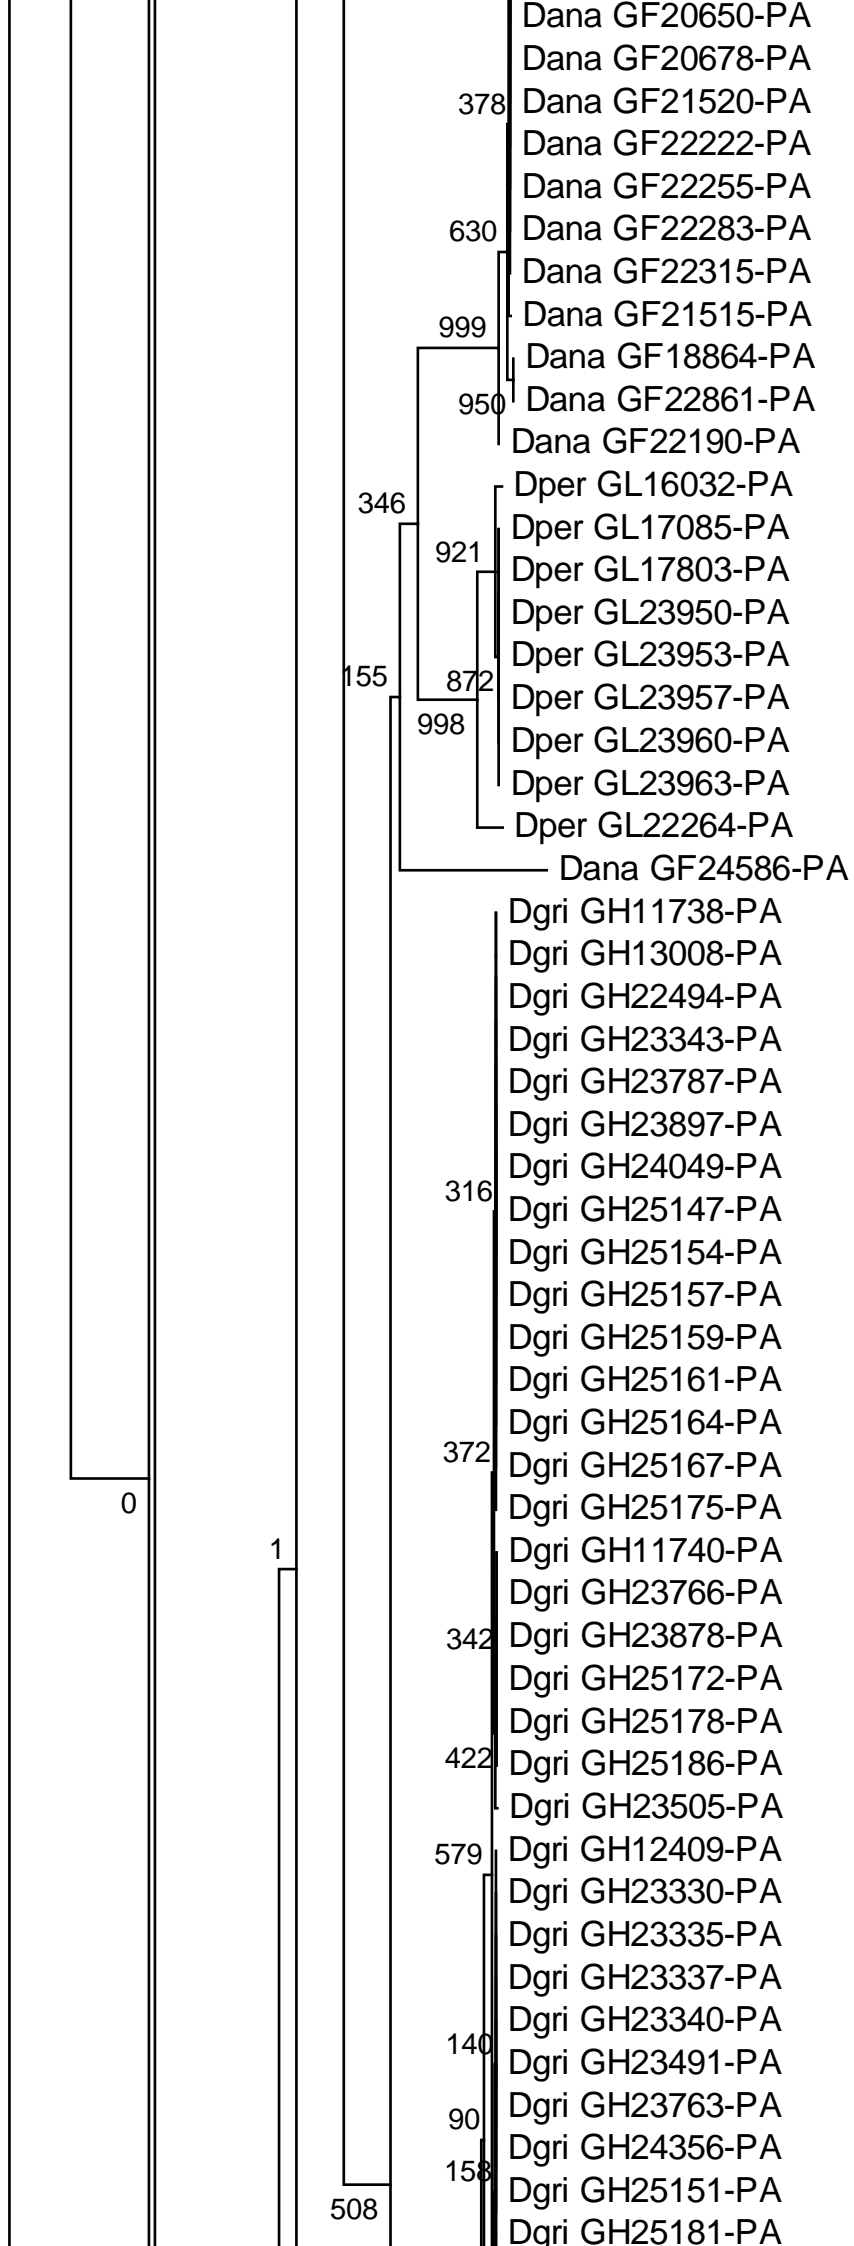

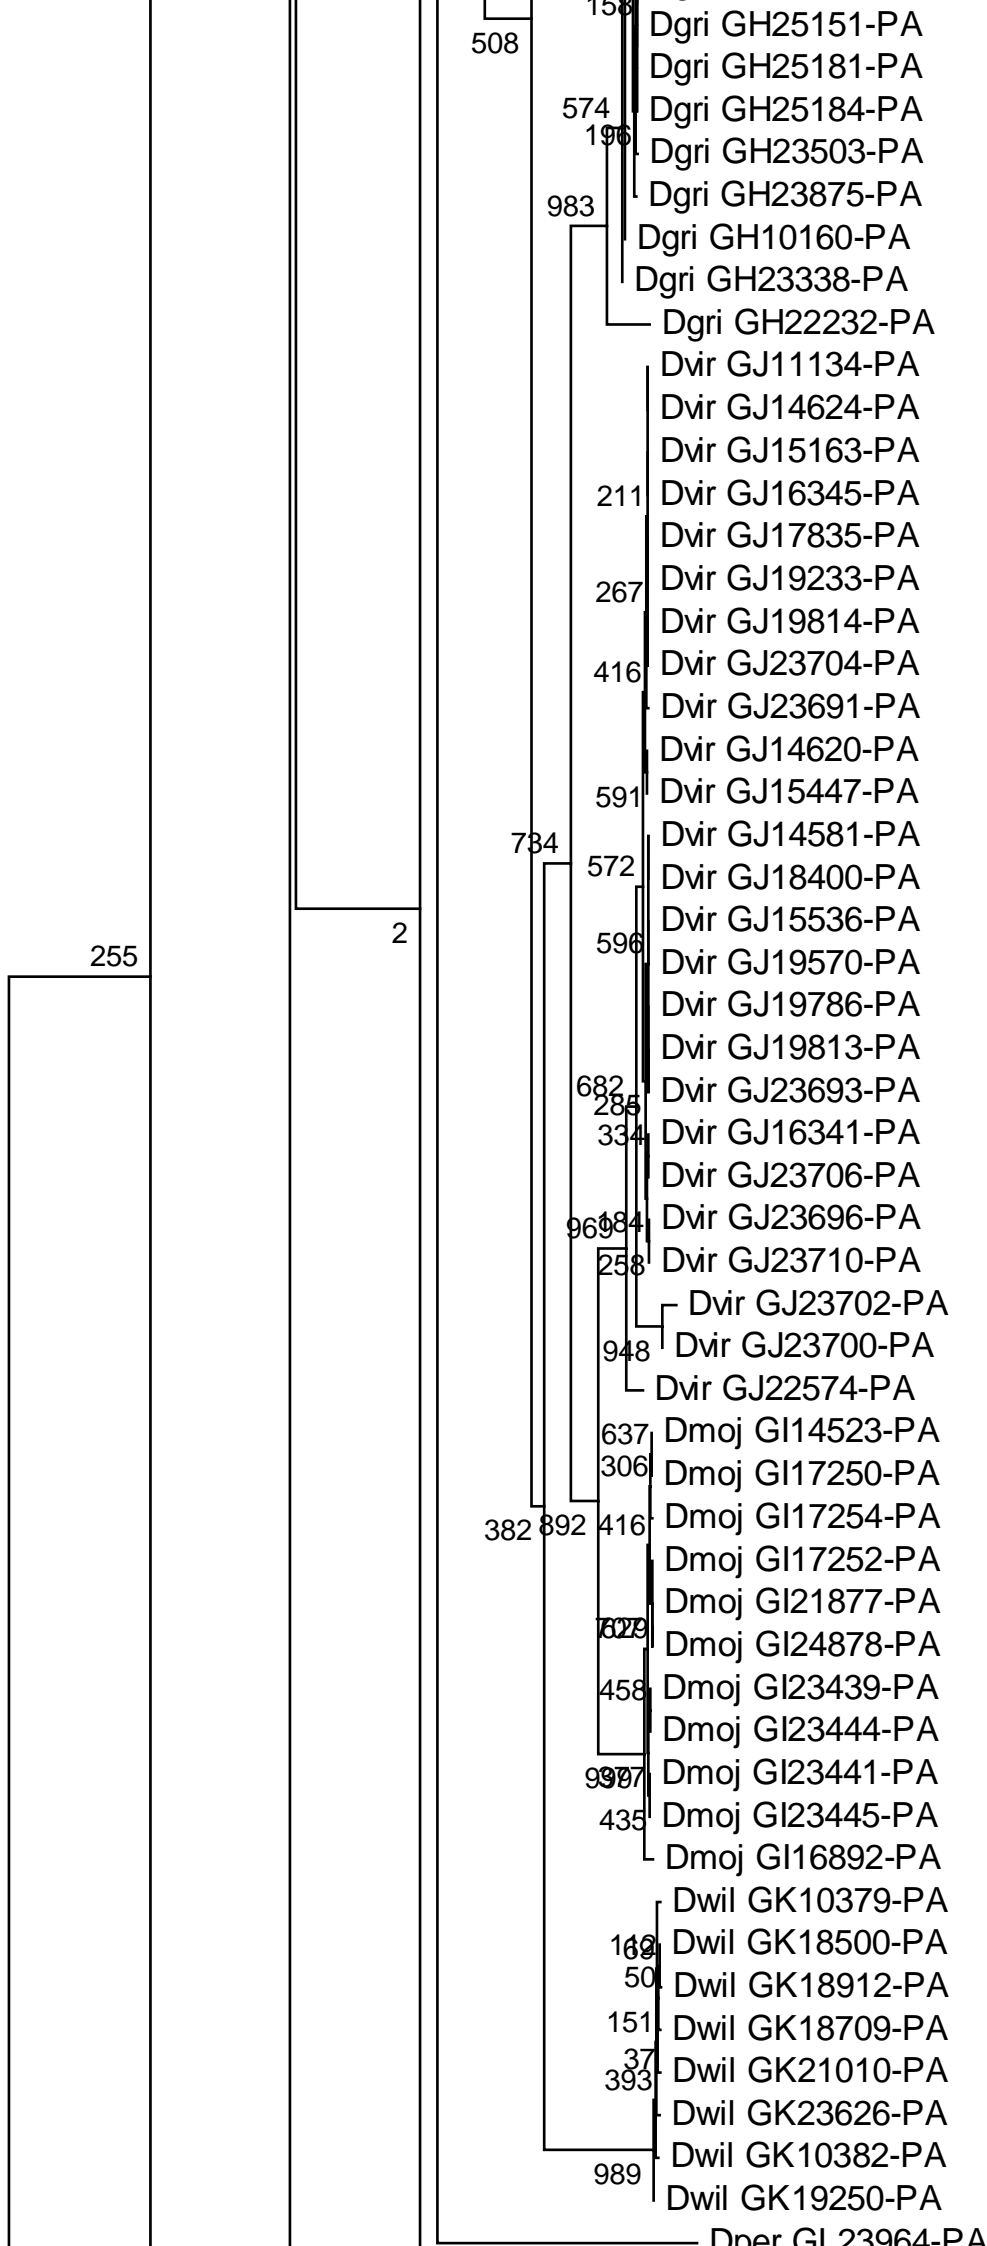

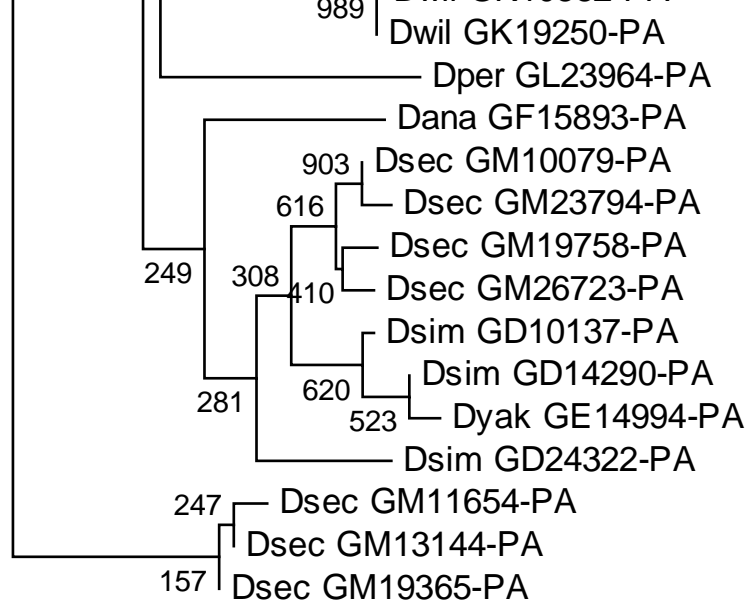

Dvir GJ19372-PA

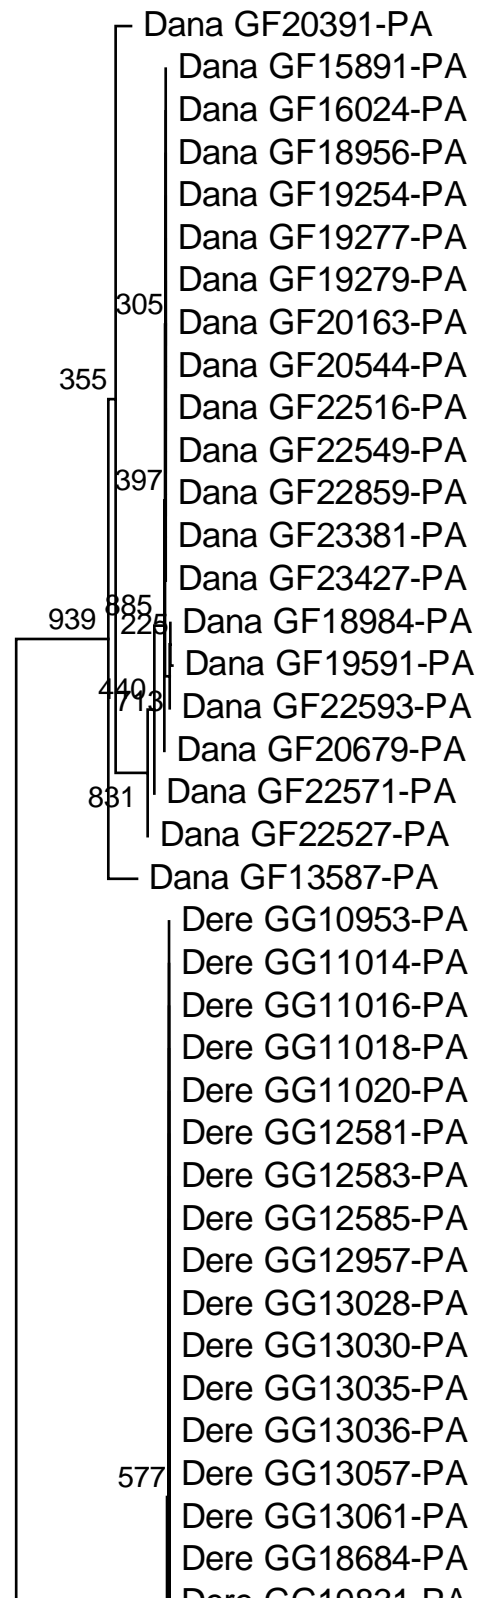

Dere GG15001-PA  
Dere GG18684-PA  
Dere GG19831-PA  
Dere GG19845-PA  
Dere GG19848-PA  
Dere GG21488-PA  
Dere GG21492-PA  
991 Dere GG21494-PA  
Dere GG21496-PA  
Dere GG21498-PA  
Dere GG21500-PA  
Dere GG21503-PA  
Dere GG21505-PA  
966 Dere GG21507-PA  
Dere GG11022-PA  
Dere GG13032-PA  
578 Dere GG16373-PA  
738 Dyak GE12987-PA  
921 Dyak GE14477-PA  
Dyak GE14635-PA  
947 Dyak GE14634-PA  
Dsec GM10080-PA  
Dsec GM13187-PA  
Dsec GM16168-PA  
Dsec GM17425-PA  
39 Dsec GM19734-PA  
Dsec GM19736-PA  
Dsec GM19761-PA  
17 Dsec GM22584-PA  
Dsec GM23249-PA  
7 Dsec GM24037-PA  
Dsec GM16942-PA  
114 Dsec GM18809-PA  
10 Dsec GM15473-PA  
18 Dsec GM11714-PA  
620 Dsec GM13203-PA  
1 Dsec GM19322-PA  
Dsec GM13135-PA  
Dsec GM11163-PA  
10 Dsec GM17446-PA  
337 Dsec GM19699-PA  
327 Dsec GM23020-PA  
382 Dsec GM19697-PA  
Dsec GM11161-PA  
Dsec GM11937-PA  
Dsec GM11052-PA  
42 Dsec GM13191-PA  
Dsec GM13213-PA  
Dsec GM13541-PA  
Dsec GM23805-PA  
Dsec GM13614-PA  
31 Dsec GM23434-PA  
17 Dsec GM19701-PA

272

338

663

756

31 Dsec GM23434-PA  
17 Dsec GM19701-PA  
40 Dsec GM18819-PA  
Dsec GM19672-PA  
Dsec GM19277-PA  
Dsec GM19328-PA  
Dsec GM12965-PA  
583 Dsec GM19289-PA  
Dsec GM11716-PA  
Dsec GM11748-PA  
Dsec GM13539-PA  
26 Dsec GM13542-PA  
Dsec GM13608-PA  
Dsec GM13660-PA  
Dsec GM16542-PA  
26 Dsec GM17711-PA  
Dsec GM19430-PA  
5 Dsec GM19608-PA  
479 Dsec GM19696-PA  
29 Dsec GM19703-PA  
Dsec GM26707-PA  
522 Dsec GM26724-PA  
Dsec GM22424-PA  
Dsec GM23415-PA  
Dsec GM16912-PA  
Dsim GD10618-PA  
Dsim GD11638-PA  
Dsim GD12301-PA  
91 Dsim GD16061-PA  
472 Dsim GD17256-PA  
Dsim GD18944-PA  
Dsim GD22888-PA  
Dsim GD25302-PA  
600 Dsim GD15506-PA  
7 Dsim GD20043-PA  
Dsim GD21846-PA  
607 Dsim GD21855-PA  
23 Dsim GD22305-PA  
Dsec GM16470-PA  
215 Dsec GM16910-PA  
Dsim GD15311-PA  
Dsec GM16472-PA  
His2B CG17949-PA  
His2B CG33868-PA  
His2B CG33870-PA  
46 His2B CG33872-PA  
His2B CG33874-PA  
His2B CG33876-PA  
His2B CG33878-PA  
His2B CG33880-PA  
His2B CG33882-PA  
His2B CG33884-PA  
His2B CG33886-PA

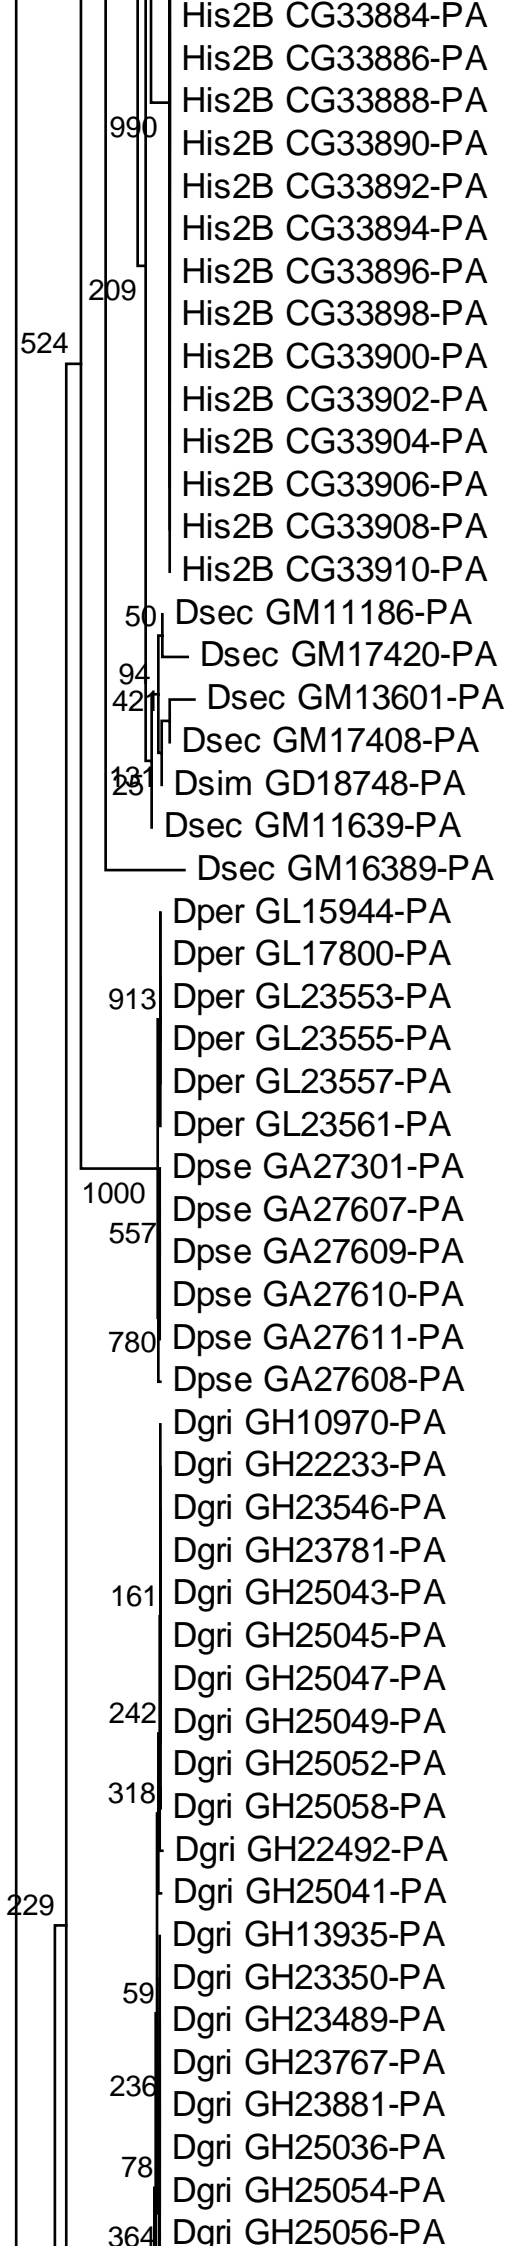

975



2

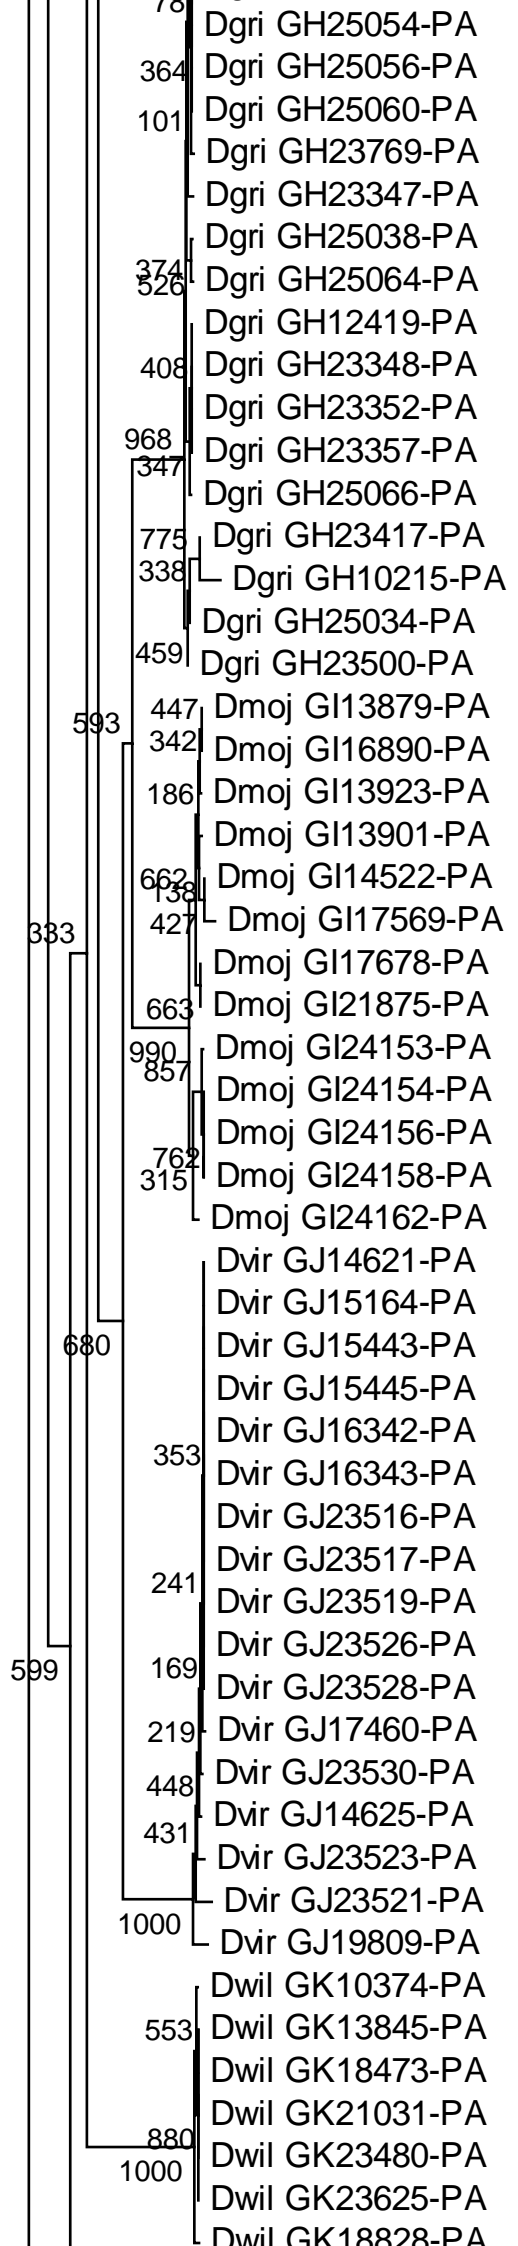

77

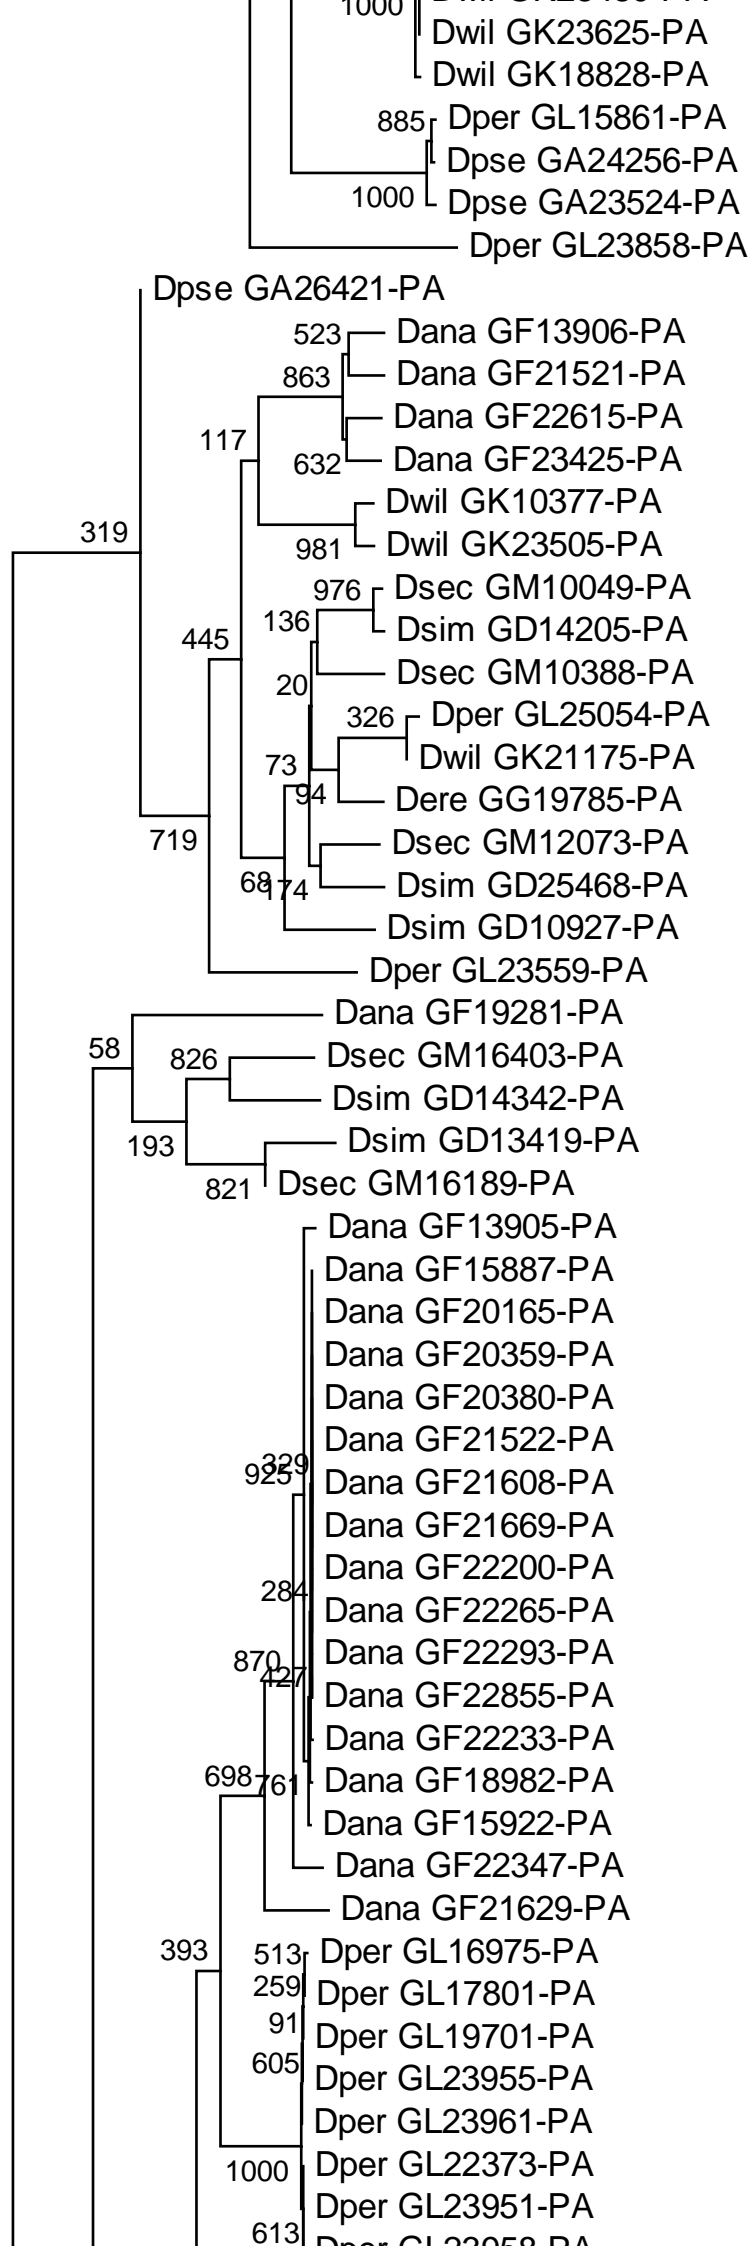

|      |                 |
|------|-----------------|
| 1000 | Dper GL22373-PA |
| 613  | Dper GL23951-PA |
|      | Dper GL23958-PA |
|      | Dgri GH10149-PA |
|      | Dgri GH23206-PA |
| 220  | Dgri GH25183-PA |
|      | Dgri GH25179-PA |
|      | Dgri GH25177-PA |
|      | Dgri GH10171-PA |
|      | Dgri GH13936-PA |
|      | Dgri GH25176-PA |
|      | Dgri GH25173-PA |
|      | Dgri GH23332-PA |
|      | Dgri GH23344-PA |
|      | Dgri GH23469-PA |
|      | Dgri GH25168-PA |
| 407  | Dgri GH25165-PA |
|      | Dgri GH25162-PA |
|      | Dgri GH25160-PA |
|      | Dgri GH23504-PA |
|      | Dgri GH23513-PA |
|      | Dgri GH25158-PA |
| 287  | Dgri GH23572-PA |
|      | Dgri GH23749-PA |
|      | Dgri GH25155-PA |
|      | Dgri GH23762-PA |
|      | Dgri GH25152-PA |
| 568  | Dgri GH24949-PA |
|      | Dgri GH25148-PA |
| 277  | Dgri GH25000-PA |
|      | Dgri GH23765-PA |
| 674  | Dgri GH23334-PA |
| 708  | Dgri GH23339-PA |
| 1000 | Dgri GH25185-PA |
| 990  | Dgri GH23876-PA |
|      | Dgri GH23257-PA |
| 889  | Dgri GH23336-PA |
|      | Dvir GJ15165-PA |
| 597  | Dvir GJ15448-PA |
|      | Dvir GJ17075-PA |
| 307  | Dvir GJ23701-PA |
|      | Dvir GJ16113-PA |
| 837  | Dvir GJ16346-PA |
| 346  | Dvir GJ19811-PA |
| 265  | Dvir GJ23698-PA |
|      | Dvir GJ23703-PA |
| 860  | Dvir GJ16344-PA |
| 846  | Dvir GJ23692-PA |
| 689  | Dvir GJ18401-PA |
|      | Dvir GJ23707-PA |
| 688  | Dvir GJ18405-PA |
| 307  | Dvir GJ18585-PA |
| 1000 | Dvir GJ23694-PA |
| 477  |                 |

1000 Dvir GJ18585-PA  
477 Dvir GJ23694-PA  
899 Dvir GJ23711-PA  
796 Dvir GJ22537-PA  
Dvir GJ22552-PA  
960 Dvir GJ22585-PA  
830 Dmoj GI11258-PA  
299 Dmoj GI17253-PA  
530 Dmoj GI12713-PA  
412 Dmoj GI17255-PA  
Dmoj GI16893-PA  
1000 Dmoj GI17251-PA  
251 Dmoj GI10040-PA  
490 Dmoj GI21876-PA  
618 662 Dmoj GI24857-PA  
1000 Dmoj GI23438-PA  
Dmoj GI23440-PA  
1000 Dmoj GI23442-PA  
Dmoj GI23446-PA  
Dwil GK10380-PA  
Dwil GK18893-PA  
654 Dwil GK19157-PA  
605 Dwil GK19237-PA  
Dwil GK21132-PA  
1000 Dwil GK25031-PA  
Dwil GK12402-PA  
Dere GG11000-PA  
Dere GG11004-PA  
Dere GG11007-PA  
Dere GG11010-PA  
Dere GG12575-PA  
Dere GG12579-PA  
Dere GG12955-PA  
Dere GG12990-PA  
Dere GG12995-PA  
Dere GG13008-PA  
Dere GG13014-PA  
Dere GG13020-PA  
Dere GG13024-PA  
Dere GG13062-PA  
352 Dere GG16357-PA  
Dere GG16369-PA  
Dere GG19791-PA  
Dere GG19806-PA  
Dere GG19816-PA  
Dere GG19830-PA  
Dere GG19850-PA  
Dere GG21307-PA  
291 Dere GG21310-PA  
Dere GG21313-PA  
Dere GG21316-PA  
Dere GG21320-PA  
450 Dere GG21323-PA

44

72

235

Dere GG21320-PA  
450 Dere GG21323-PA  
Dere GG21326-PA  
Dere GG21333-PA  
Dere GG21334-PA  
Dere GG18243-PA  
953 Dere GG21330-PA  
977 Dere GG13017-PA  
487 Dere GG21273-PA  
321 Dere GG10949-PA  
159 Dere GG16482-PA  
Dere GG16360-PA  
391 Dere GG16350-PA  
74 Dere GG13109-PA  
Dsec GM10805-PA  
Dsec GM22103-PA  
Dsec GM26727-PA  
Dsec GM11184-PA  
Dsec GM19759-PA  
Dsec GM21950-PA  
Dsec GM19722-PA  
Dsec GM19753-PA  
Dsec GM19648-PA  
Dsec GM19709-PA  
Dsec GM19311-PA  
9 Dsec GM19314-PA  
Dsec GM18735-PA  
Dsec GM18805-PA  
Dsec GM16397-PA  
Dsec GM17398-PA  
Dsec GM16232-PA  
Dsec GM16280-PA  
16 Dsec GM15133-PA  
Dsec GM15453-PA  
Dsec GM13179-PA  
Dsec GM13626-PA  
4 Dsec GM11166-PA  
Dsec GM13139-PA  
Dsec GM11148-PA  
6 Dsec GM11653-PA  
Dsec GM13629-PA  
188 Dsec GM16279-PA  
Dsec GM25125-PA  
13 Dsec GM11042-PA  
530 Dsec GM19325-PA  
17 Dsec GM24194-PA  
Dsec GM19670-PA  
533 Dsec GM26661-PA  
Dsec GM19655-PA  
Dsec GM11181-PA  
Dsec GM11708-PA  
Dsec GM12074-PA  
Dsec GM12385-PA

115

147

213

123

316

475

43  
32

27

22

119

60

300

49

133

320

205

476

20

257

1

1

24

957

543

182

1

106

11

Dsec GM12074-PA  
Dsec GM12385-PA  
Dsec GM13193-PA  
Dsec GM13196-PA  
Dsec GM13543-PA  
Dsec GM16108-PA  
Dsec GM19343-PA  
Dsec GM19711-PA  
Dsec GM19719-PA  
Dsec GM19726-PA  
Dsec GM19729-PA  
Dsec GM19738-PA  
Dsec GM23425-PA  
Dsec GM24967-PA  
Dsim GD11866-PA  
Dsim GD13199-PA  
Dsim GD21986-PA  
Dsim GD19005-PA  
Dsim GD17998-PA  
Dsim GD11987-PA  
Dsim GD12595-PA  
Dsim GD15753-PA  
Dsim GD15434-PA  
Dsim GD12699-PA  
Dsim GD13036-PA  
Dsim GD13666-PA  
Dsim GD14456-PA  
Dsim GD14852-PA  
Dsim GD15113-PA  
Dsec GM19740-PA  
Dsec GM13582-PA  
Dsec GM18832-PA  
Dsec GM19351-PA  
Dsec GM11711-PA  
Dsec GM13124-PA  
Dsec GM16257-PA  
Dsec GM17442-PA  
Dsec GM16173-PA  
Dsec GM20952-PA  
Dsec GM26759-PA  
Dsec GM19316-PA  
Dsec GM19716-PA  
Dsec GM16917-PA  
Dsec GM13606-PA  
Dsec GM11039-PA  
Dsec GM19745-PA  
His3 CG31613-PA  
His3 CG33803-PA  
His3 CG33806-PA  
His3 CG33809-PA  
His3 CG33812-PA  
His3 CG33815-PA  
His3 CG33833-PA

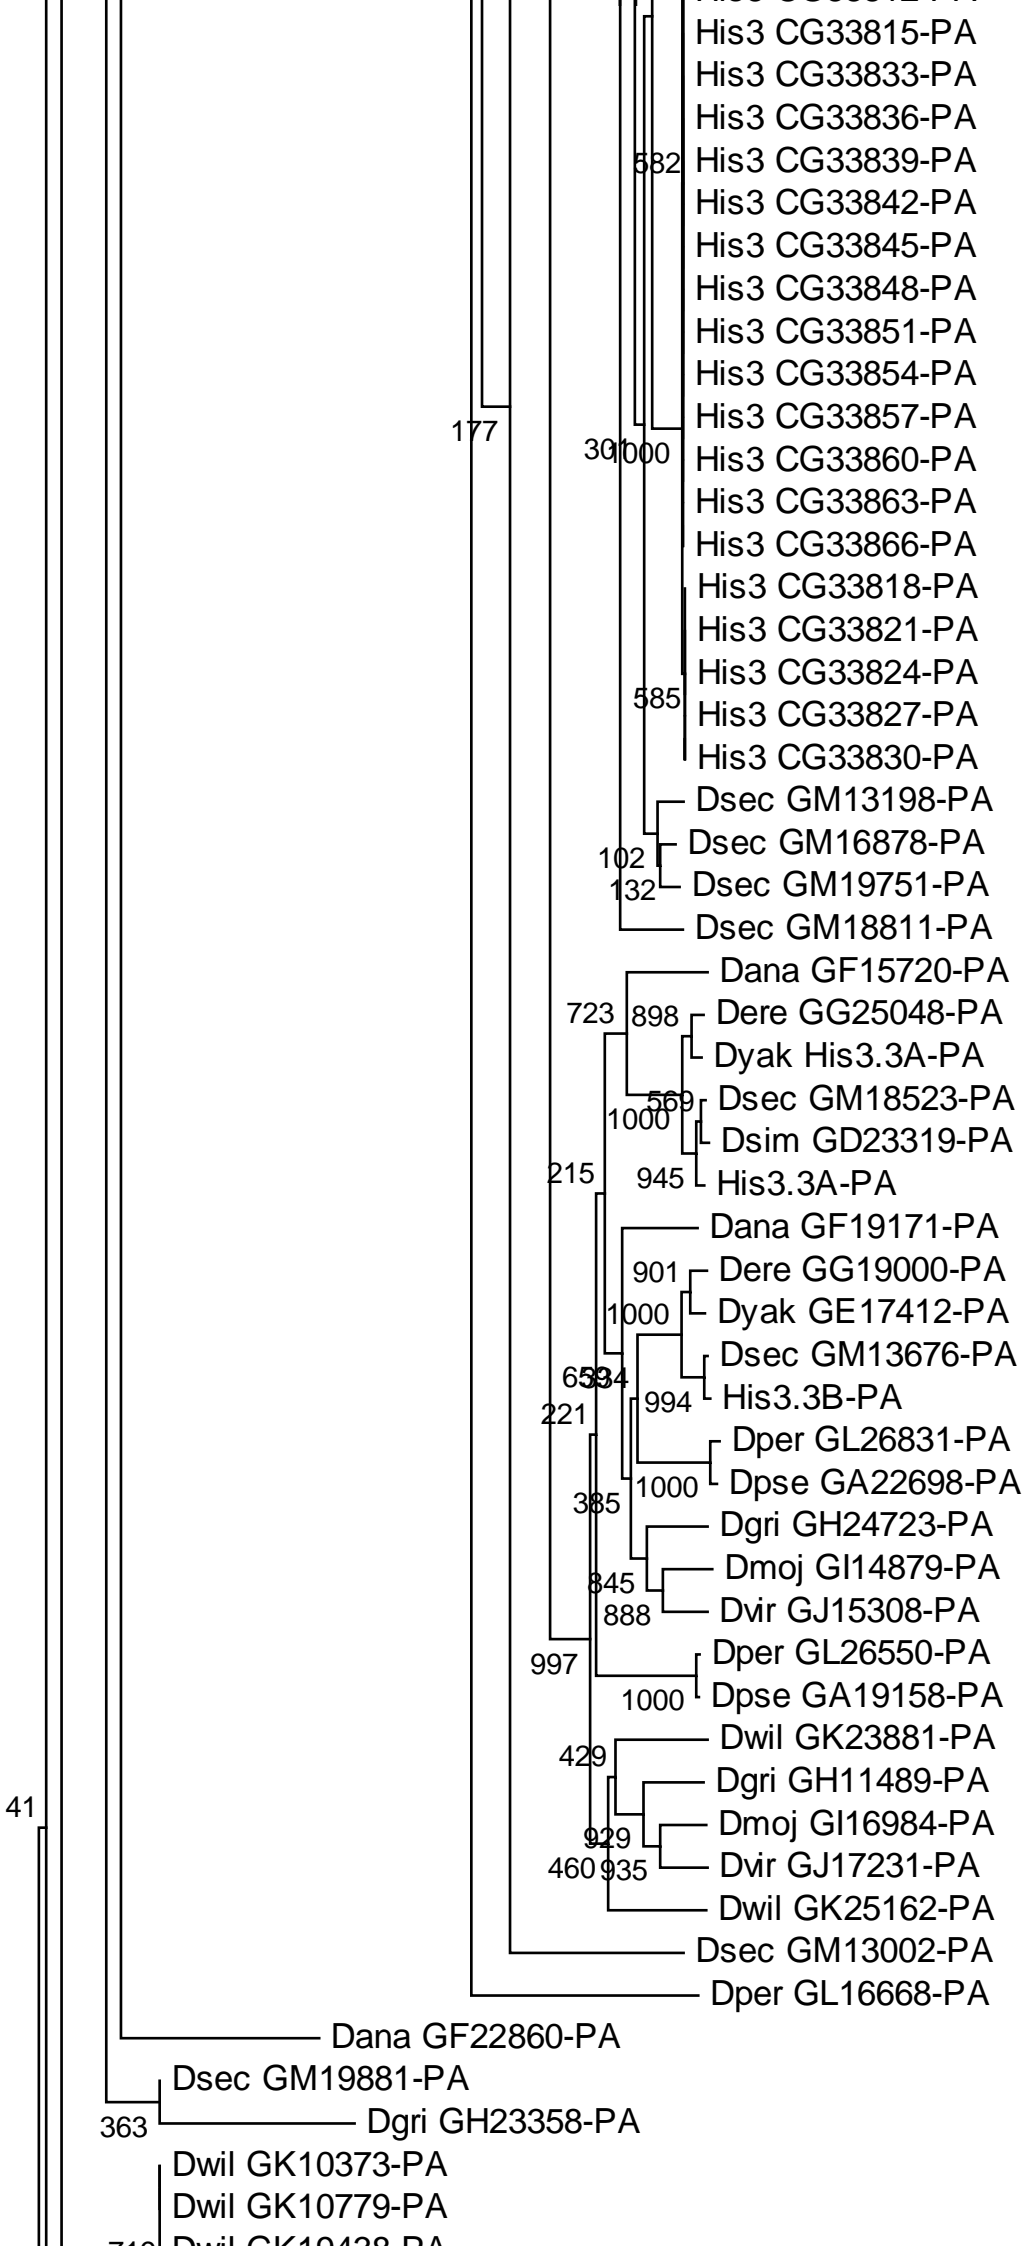

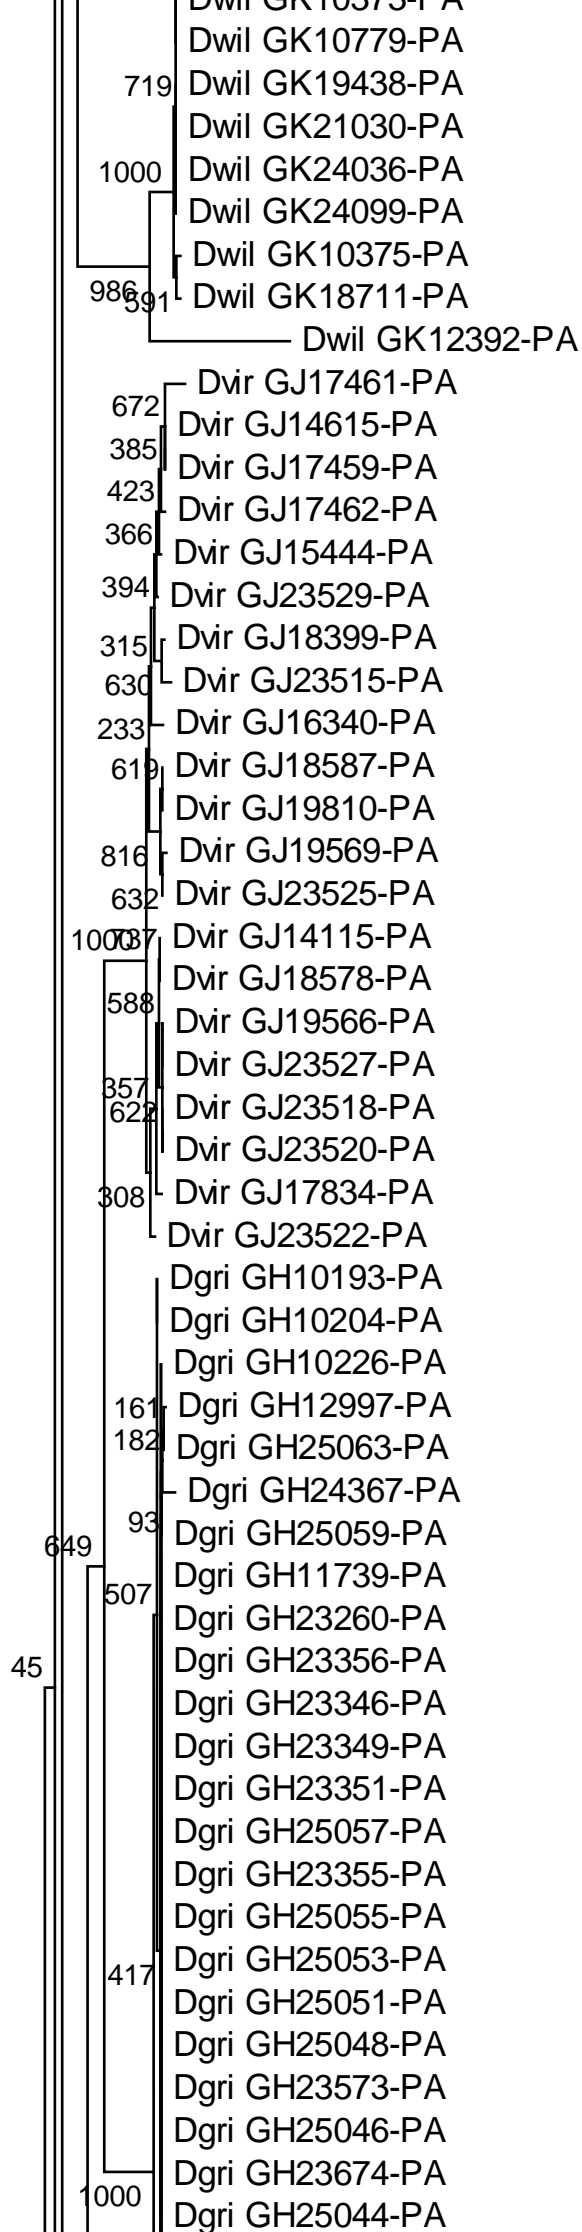



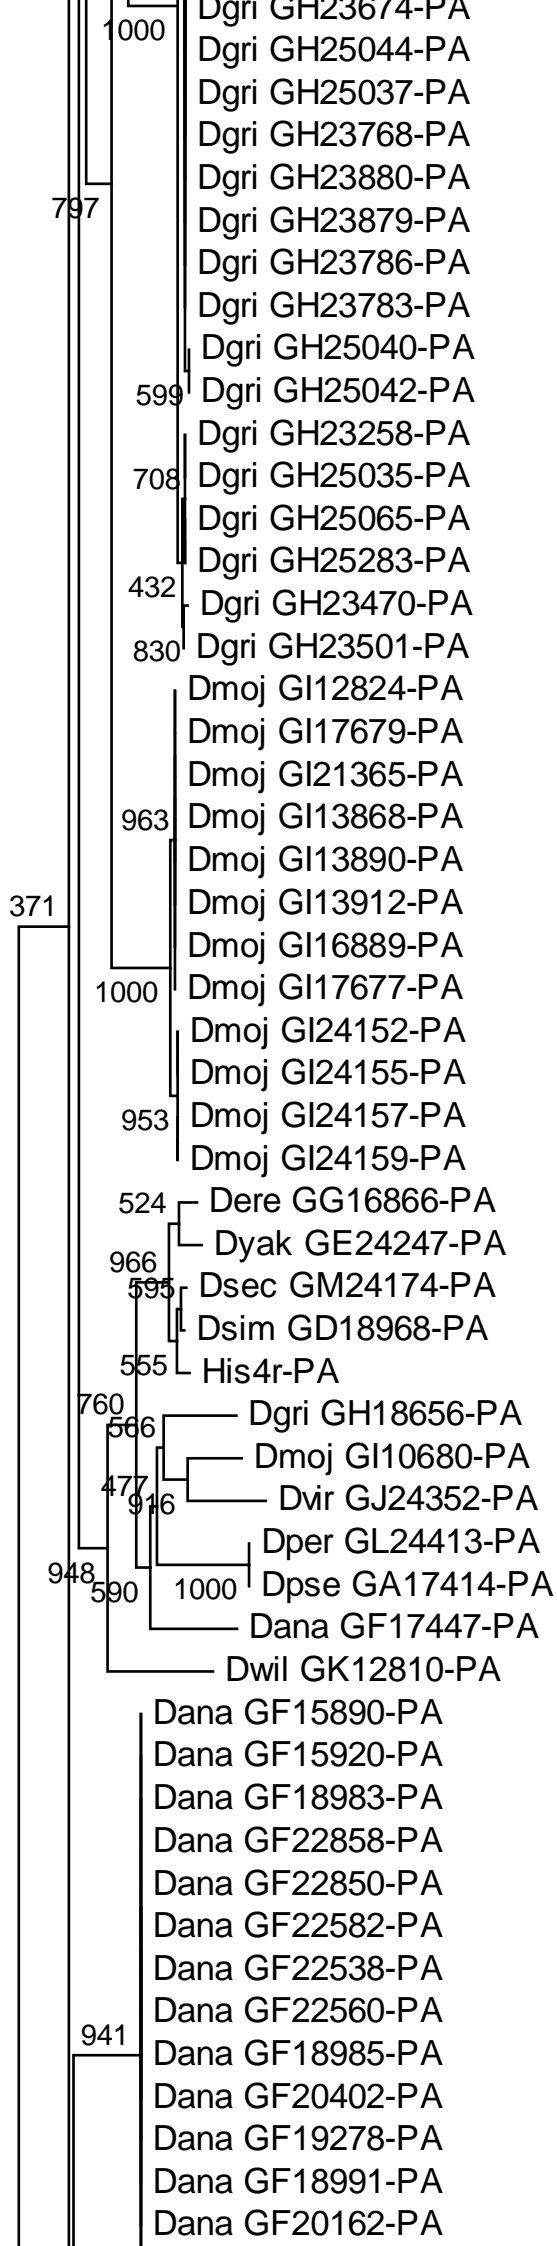

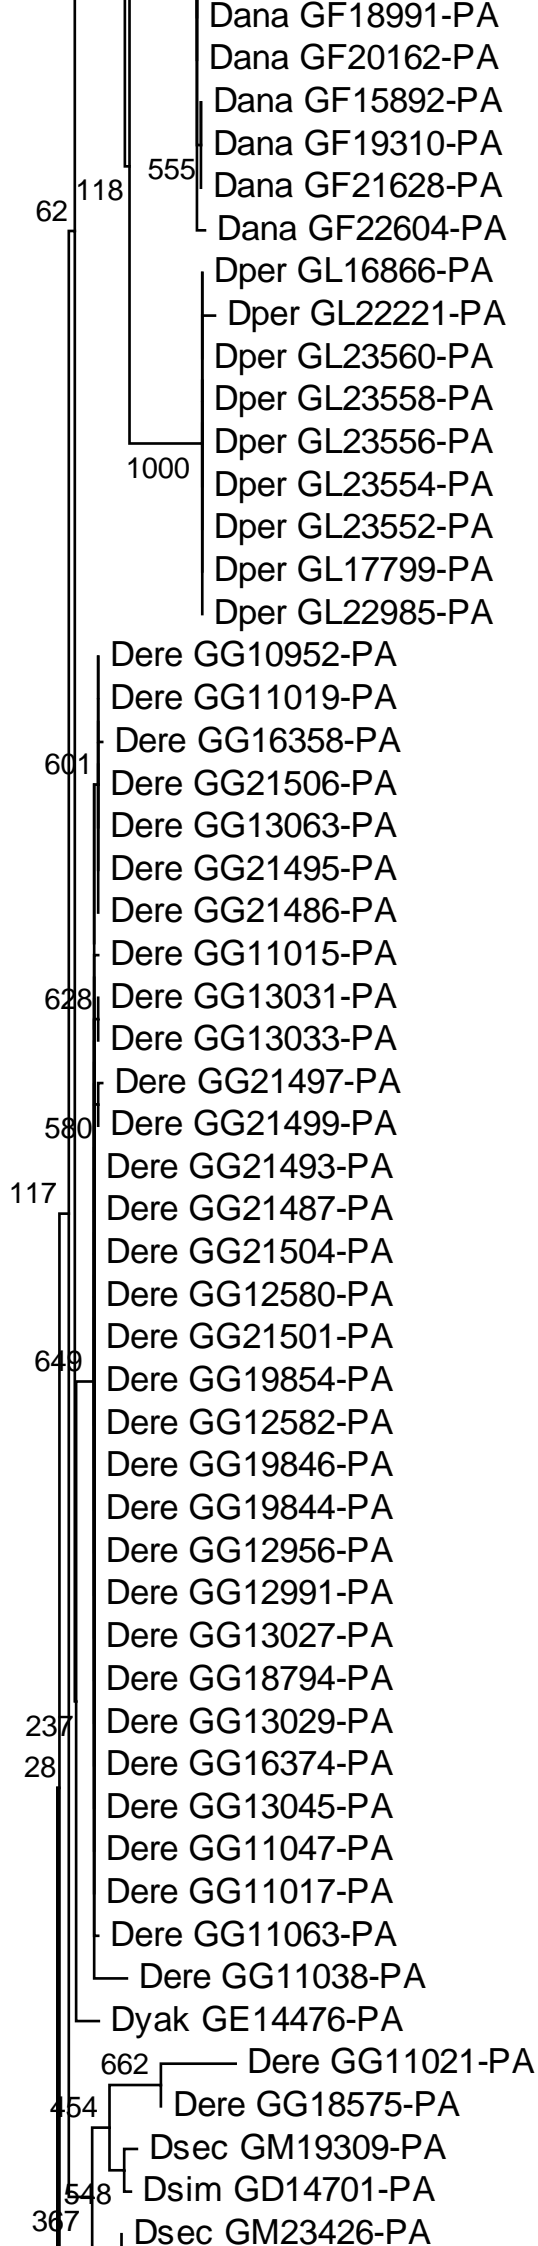

548 Dsim GD14701-PA  
367 Dsec GM23426-PA  
782 Dsec GM25114-PA  
424 Dsim GD21638-PA  
Dsec GM17429-PA  
Dsim GD10660-PA  
Dsim GD10926-PA  
Dsim GD11217-PA  
Dsim GD11690-PA  
Dsim GD11764-PA  
753 Dsim GD12574-PA  
Dsim GD18029-PA  
Dsim GD18050-PA  
Dsim GD18653-PA  
Dsim GD18759-PA  
Dsim GD19097-PA  
Dsec GM11149-PA  
Dsec GM19735-PA  
Dsec GM11749-PA  
473 Dsec GM19317-PA  
Dsec GM13120-PA  
Dsec GM13186-PA  
Dsec GM19313-PA  
Dsec GM19694-PA  
281 Dsec GM13000-PA  
Dsec GM16471-PA  
1 Dsec GM16166-PA  
His4 CG31611-PA  
His4 CG33883-PA  
His4 CG33909-PA  
His4 CG33871-PA  
17 His4 CG33889-PA  
His4 CG33873-PA  
His4 CG33875-PA  
His4 CG33885-PA  
His4 CG33887-PA  
916 His4 CG33901-PA  
His4 CG33903-PA  
7 His4 CG33905-PA  
His4 CG33907-PA  
His4 CG33891-PA  
His4 CG33893-PA  
243 His4 CG33895-PA  
His4 CG33897-PA  
His4 CG33899-PA  
His4 CG33869-PA  
His4 CG33881-PA  
606 His4 CG33877-PA  
His4 CG33879-PA  
111 Dsec GM19707-PA  
Dsec GM19598-PA  
Dsec GM16913-PA  
Dsec GM16911-PA

Dsec GM16913-PA  
Dsec GM16911-PA  
Dsec GM26758-PA  
Dsec GM17454-PA  
418 Dsec GM13540-PA  
Dsec GM22134-PA  
484 Dsec GM17861-PA  
Dsec GM19319-PA  
62 Dsec GM19702-PA  
Dsec GM19698-PA  
Dsec GM16230-PA  
566 Dsec GM19601-PA  
Dsec GM26664-PA  
Dsec GM16395-PA  
575 Dsec GM20288-PA  
Dsec GM13180-PA  
Dsec GM13538-PA  
584 Dsec GM16393-PA  
Dsec GM17443-PA  
Dsec GM19324-PA  
Dsec GM19326-PA  
Dsec GM11159-PA  
Dsec GM11683-PA  
Dsec GM16185-PA  
Dsec GM13140-PA  
Dsec GM16164-PA  
Dsec GM16107-PA  
Dsec GM13631-PA  
Dsec GM22670-PA  
Dsec GM13190-PA  
Dsec GM20007-PA  
Dsec GM13192-PA  
Dsec GM13525-PA  
Dsec GM11187-PA  
Dsec GM11745-PA  
Dsec GM16891-PA  
Dsec GM16925-PA  
Dsec GM18834-PA  
Dsec GM19352-PA  
Dsec GM11715-PA  
Dsec GM13168-PA  
Dsec GM22033-PA  
Dsec GM13562-PA  
Dsec GM13630-PA  
Dsec GM15136-PA  
Dsec GM19700-PA  
Dsec GM19693-PA  
Dsec GM19704-PA  
Dsec GM11162-PA  
Dsec GM11845-PA  
Dsec GM12950-PA  
472 Dsec GM13181-PA  
Dsec GM10760-PA



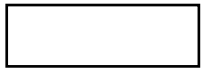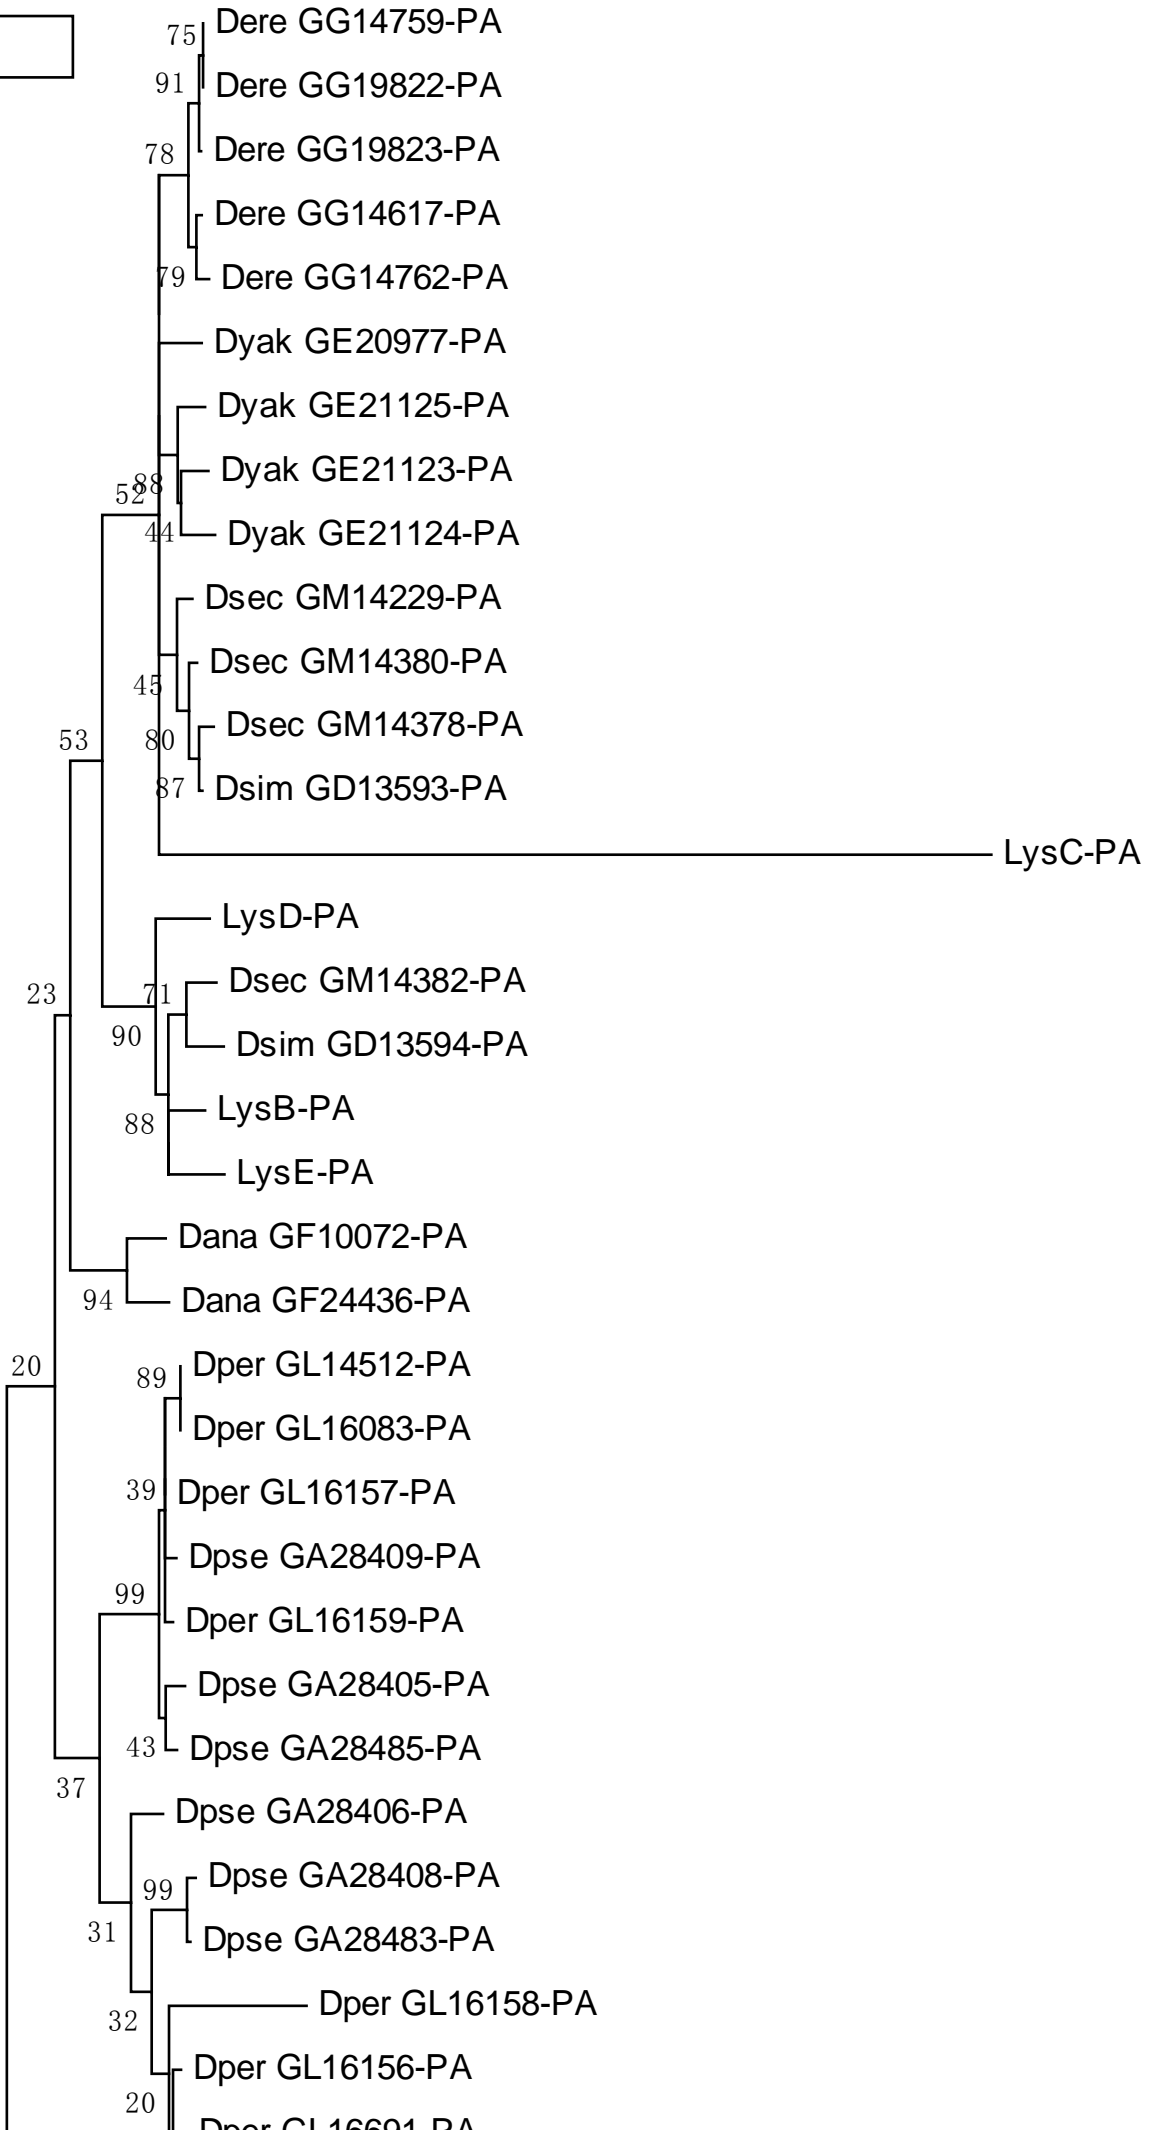

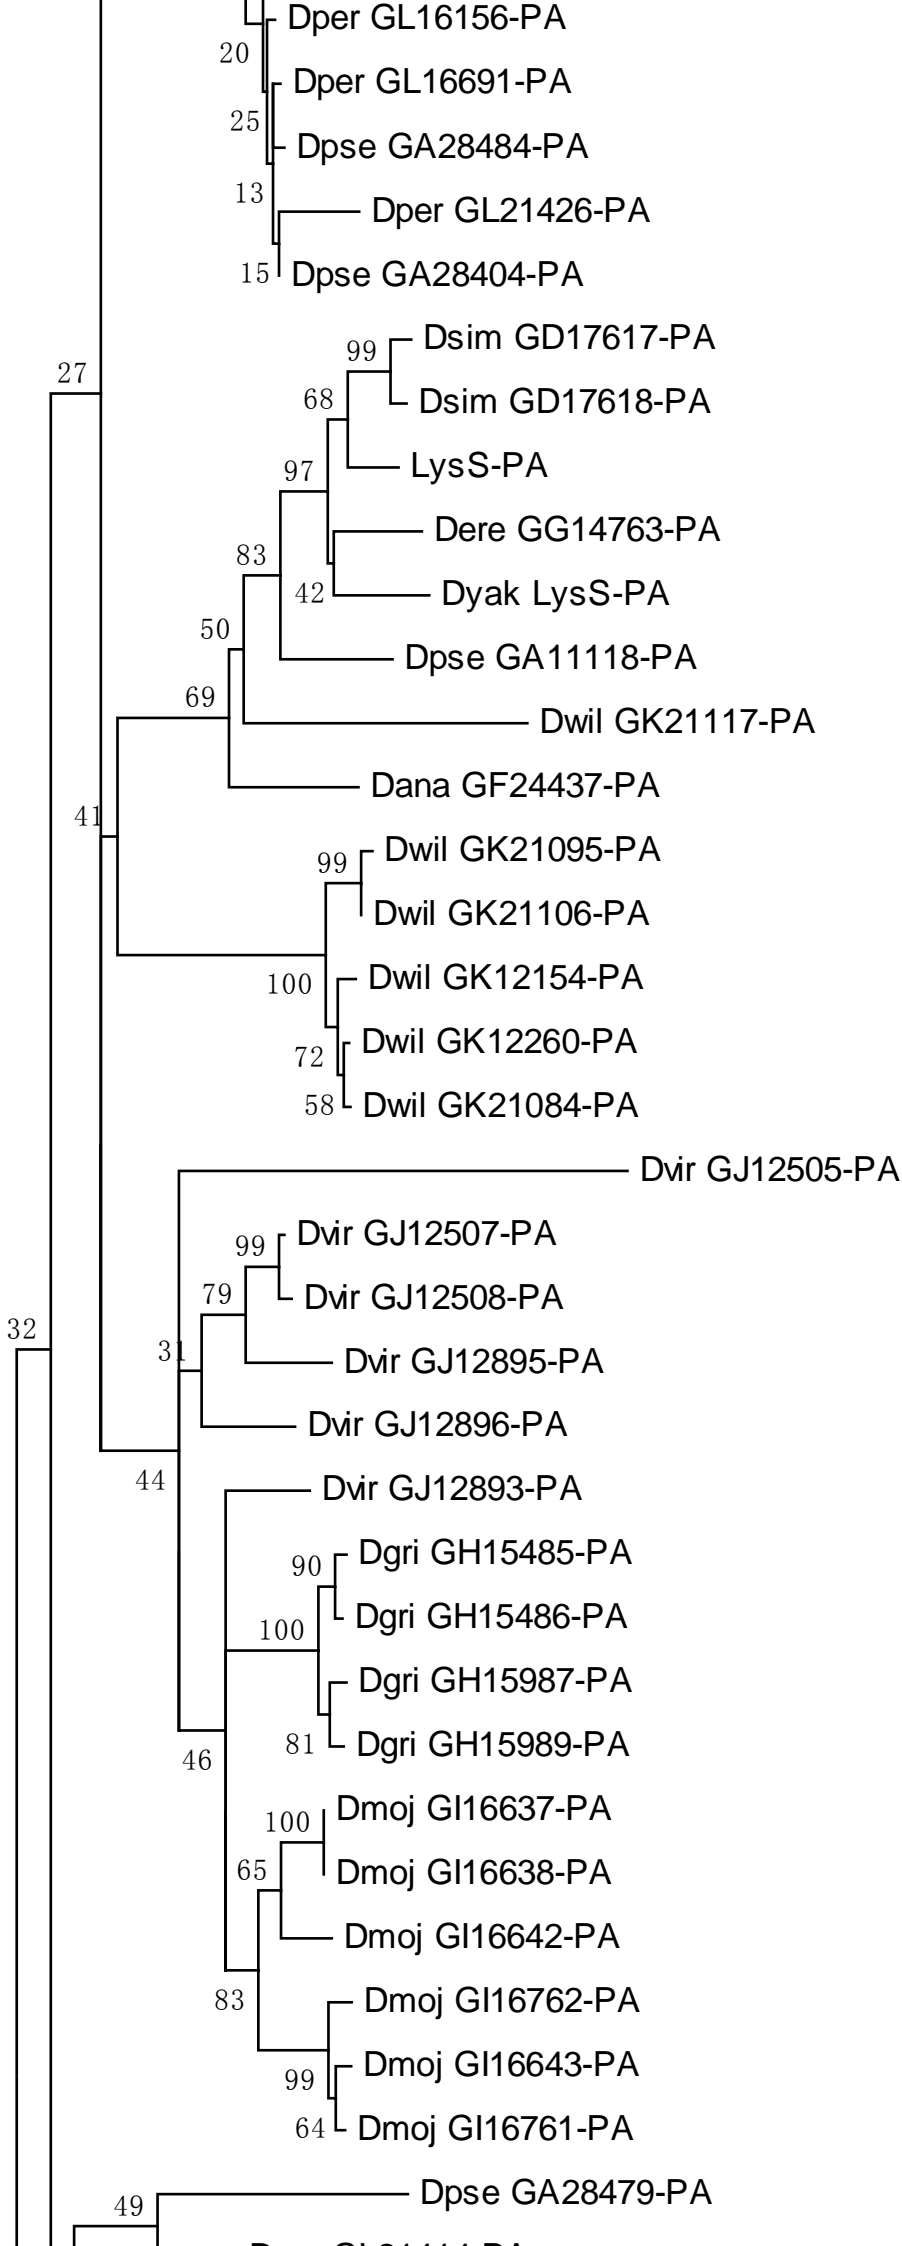

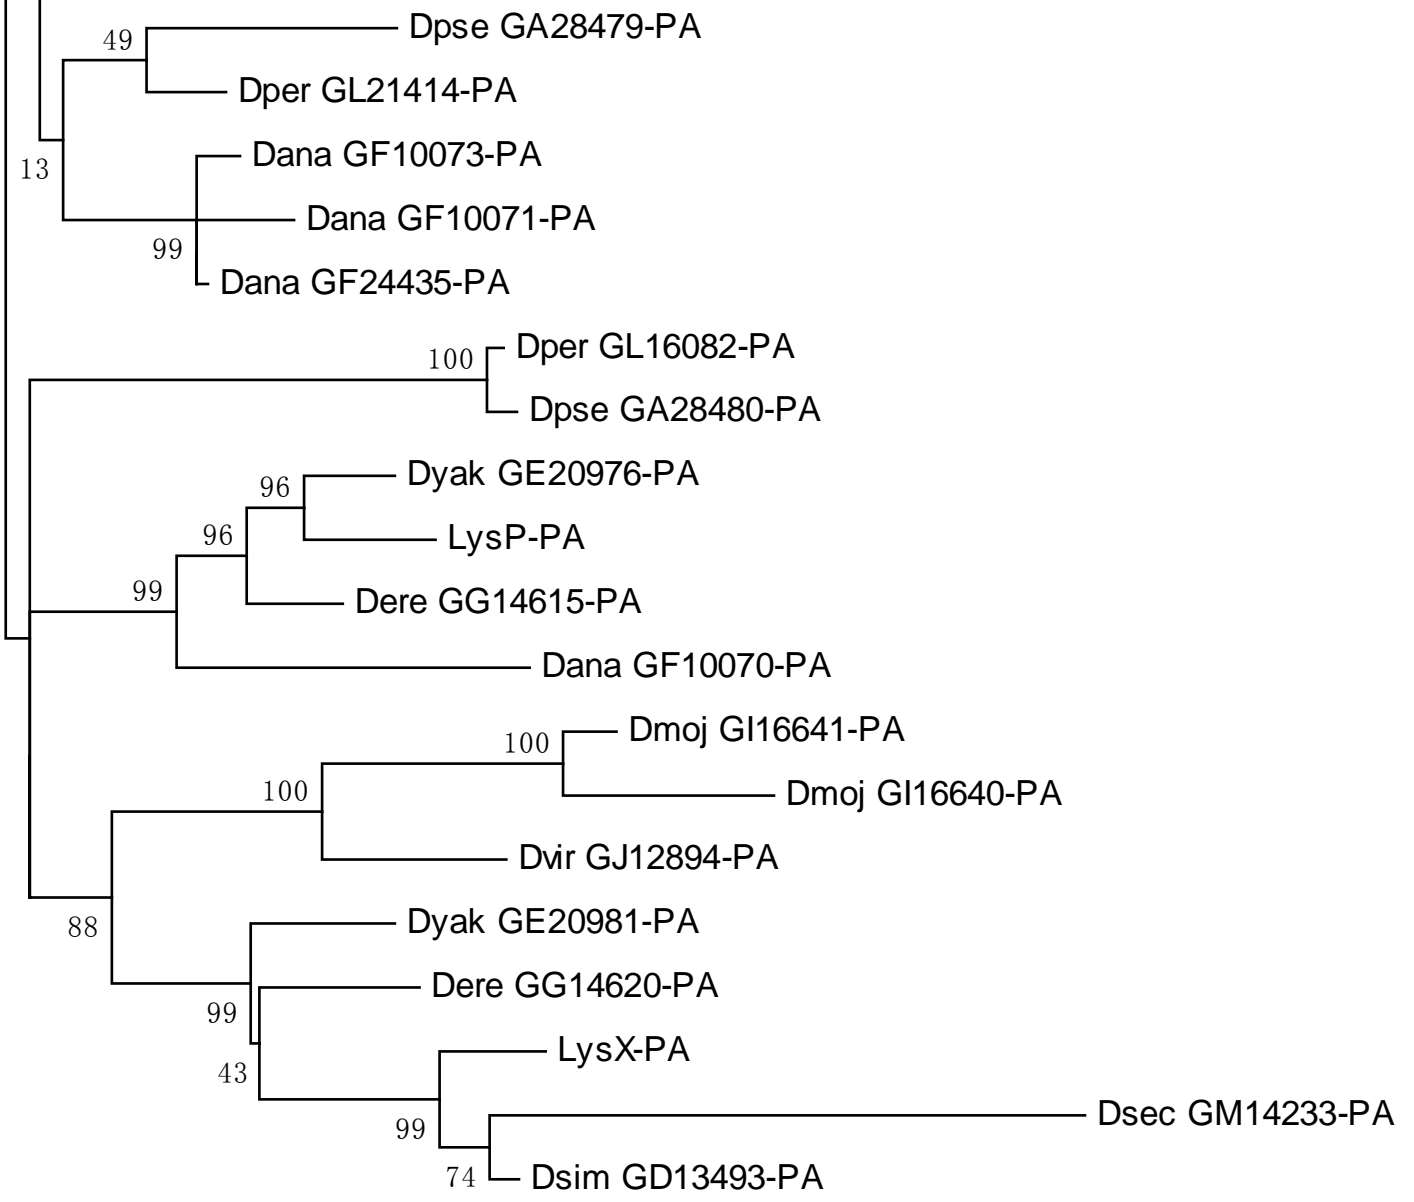

0.05



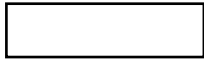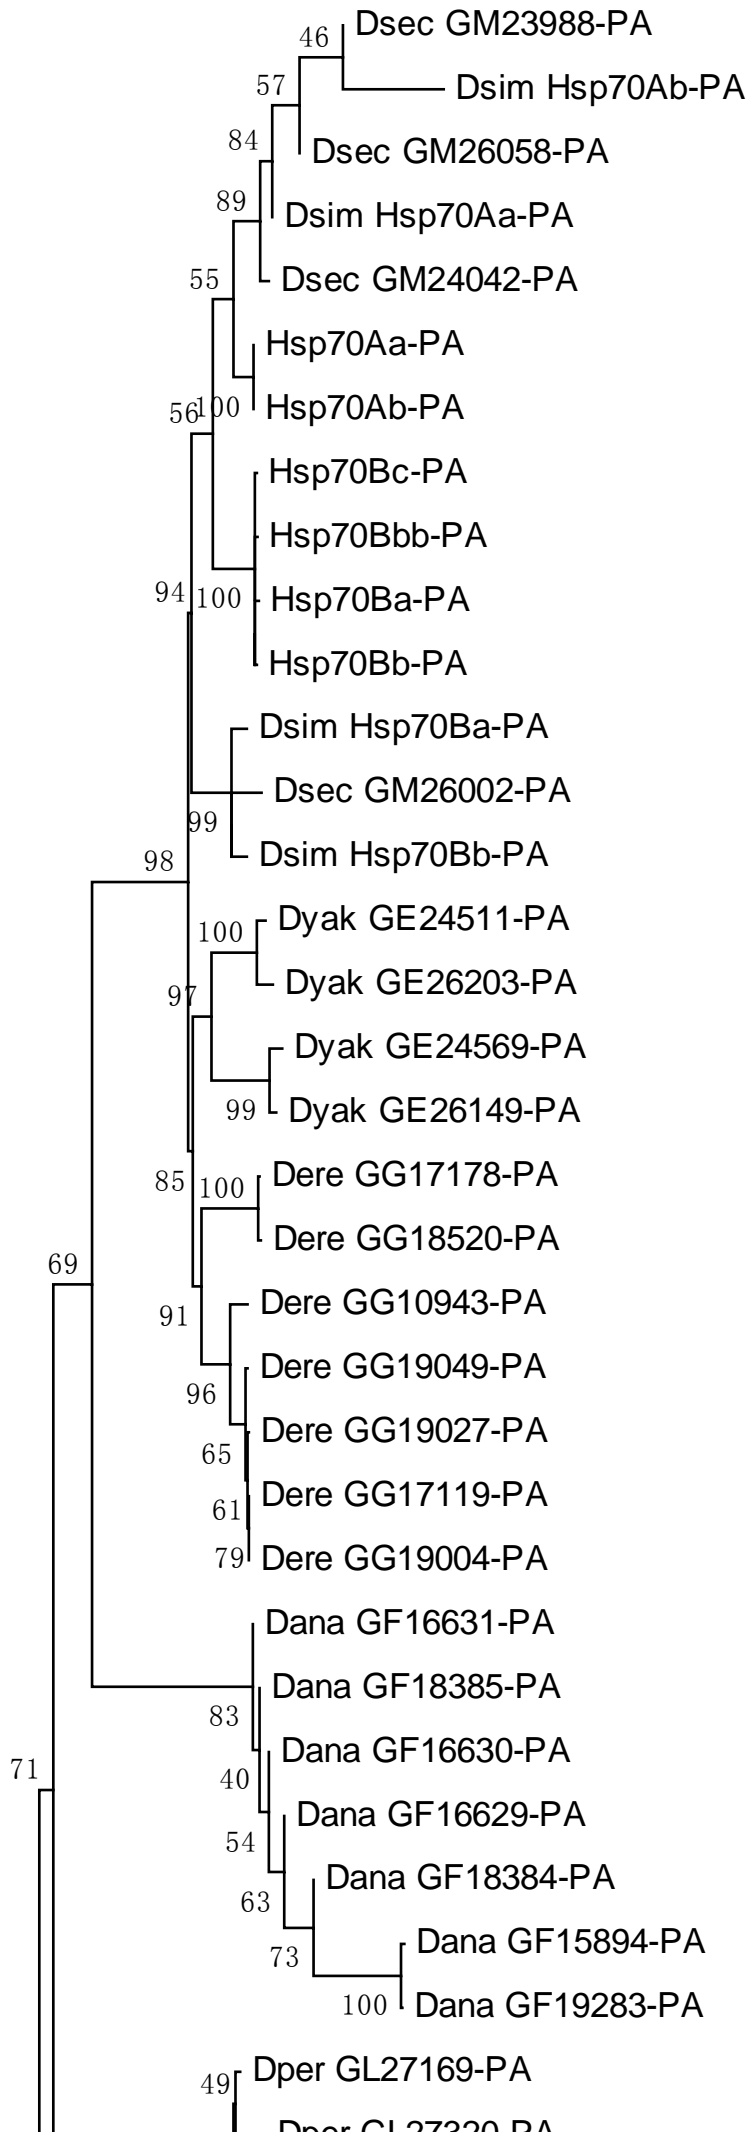

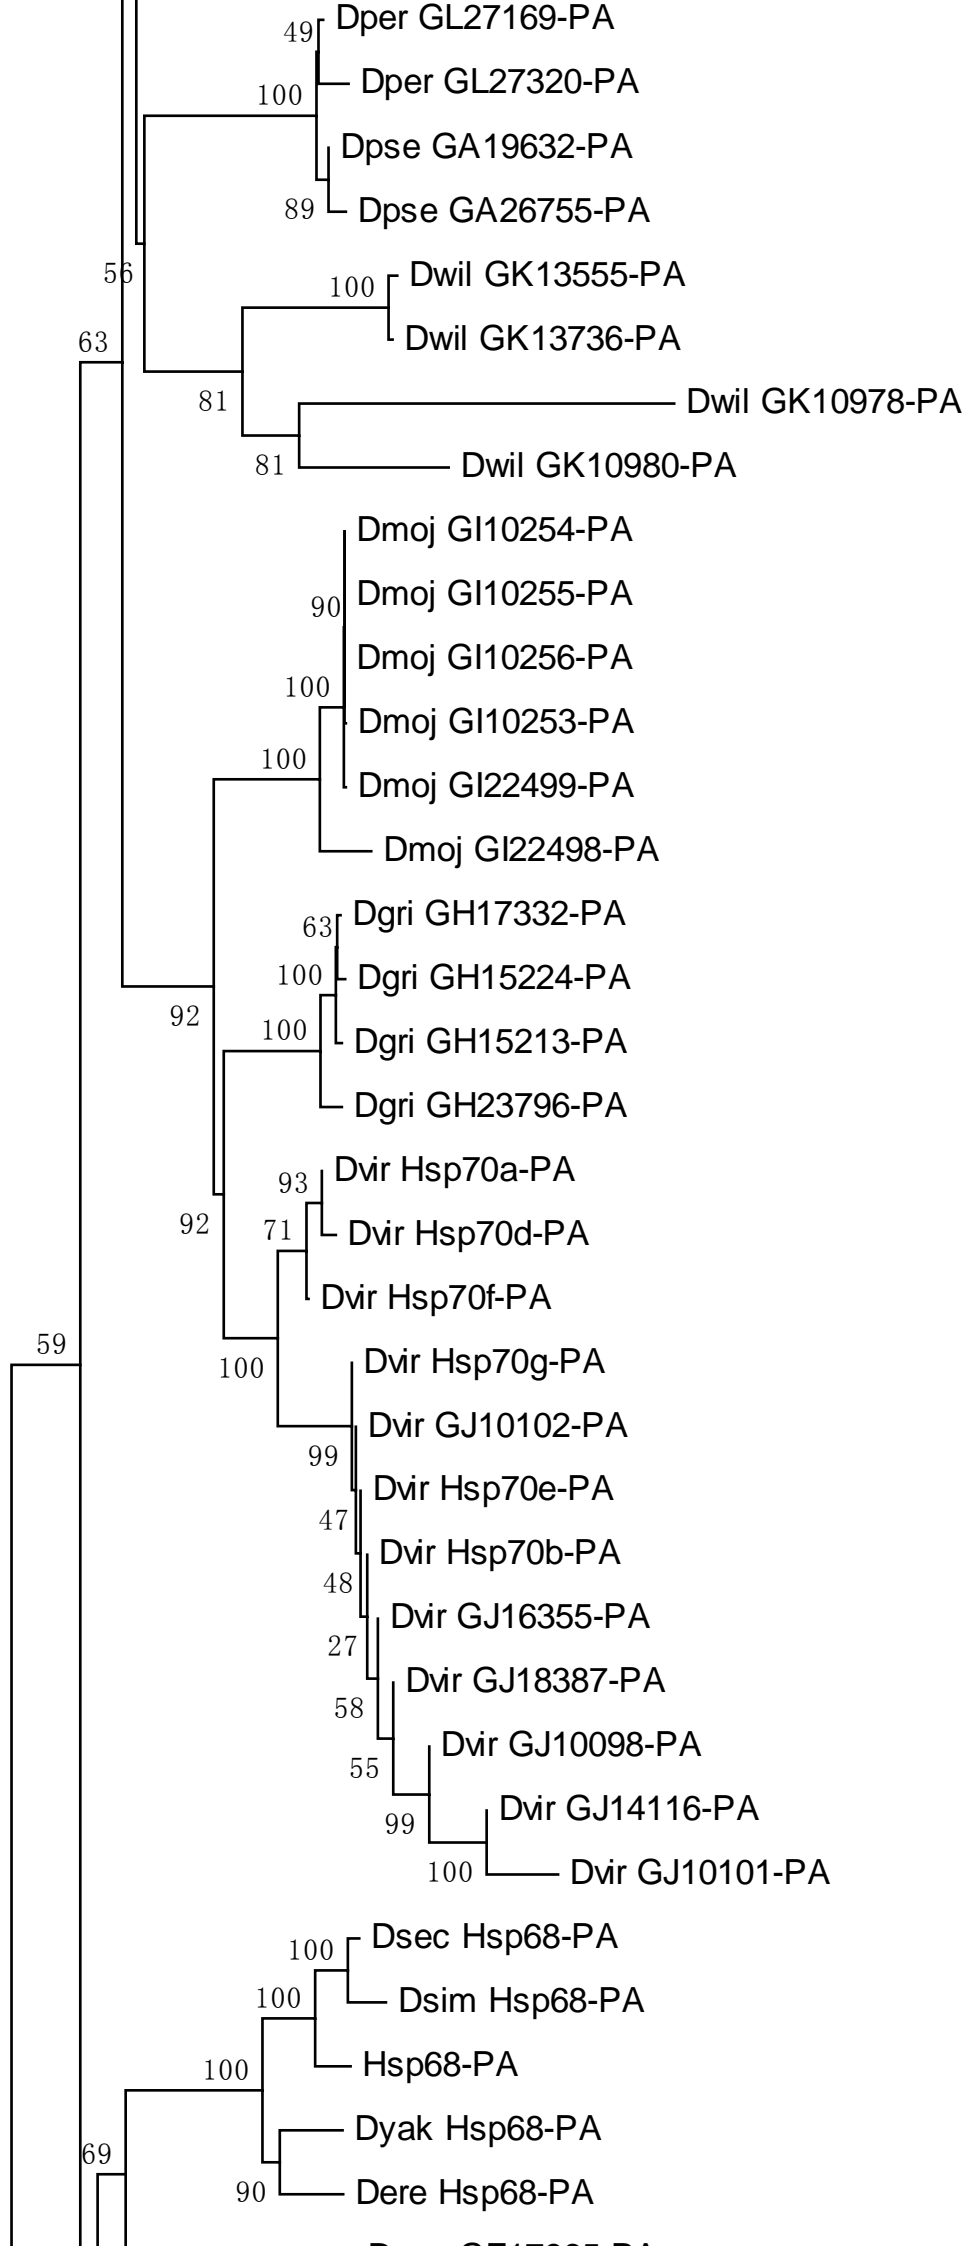

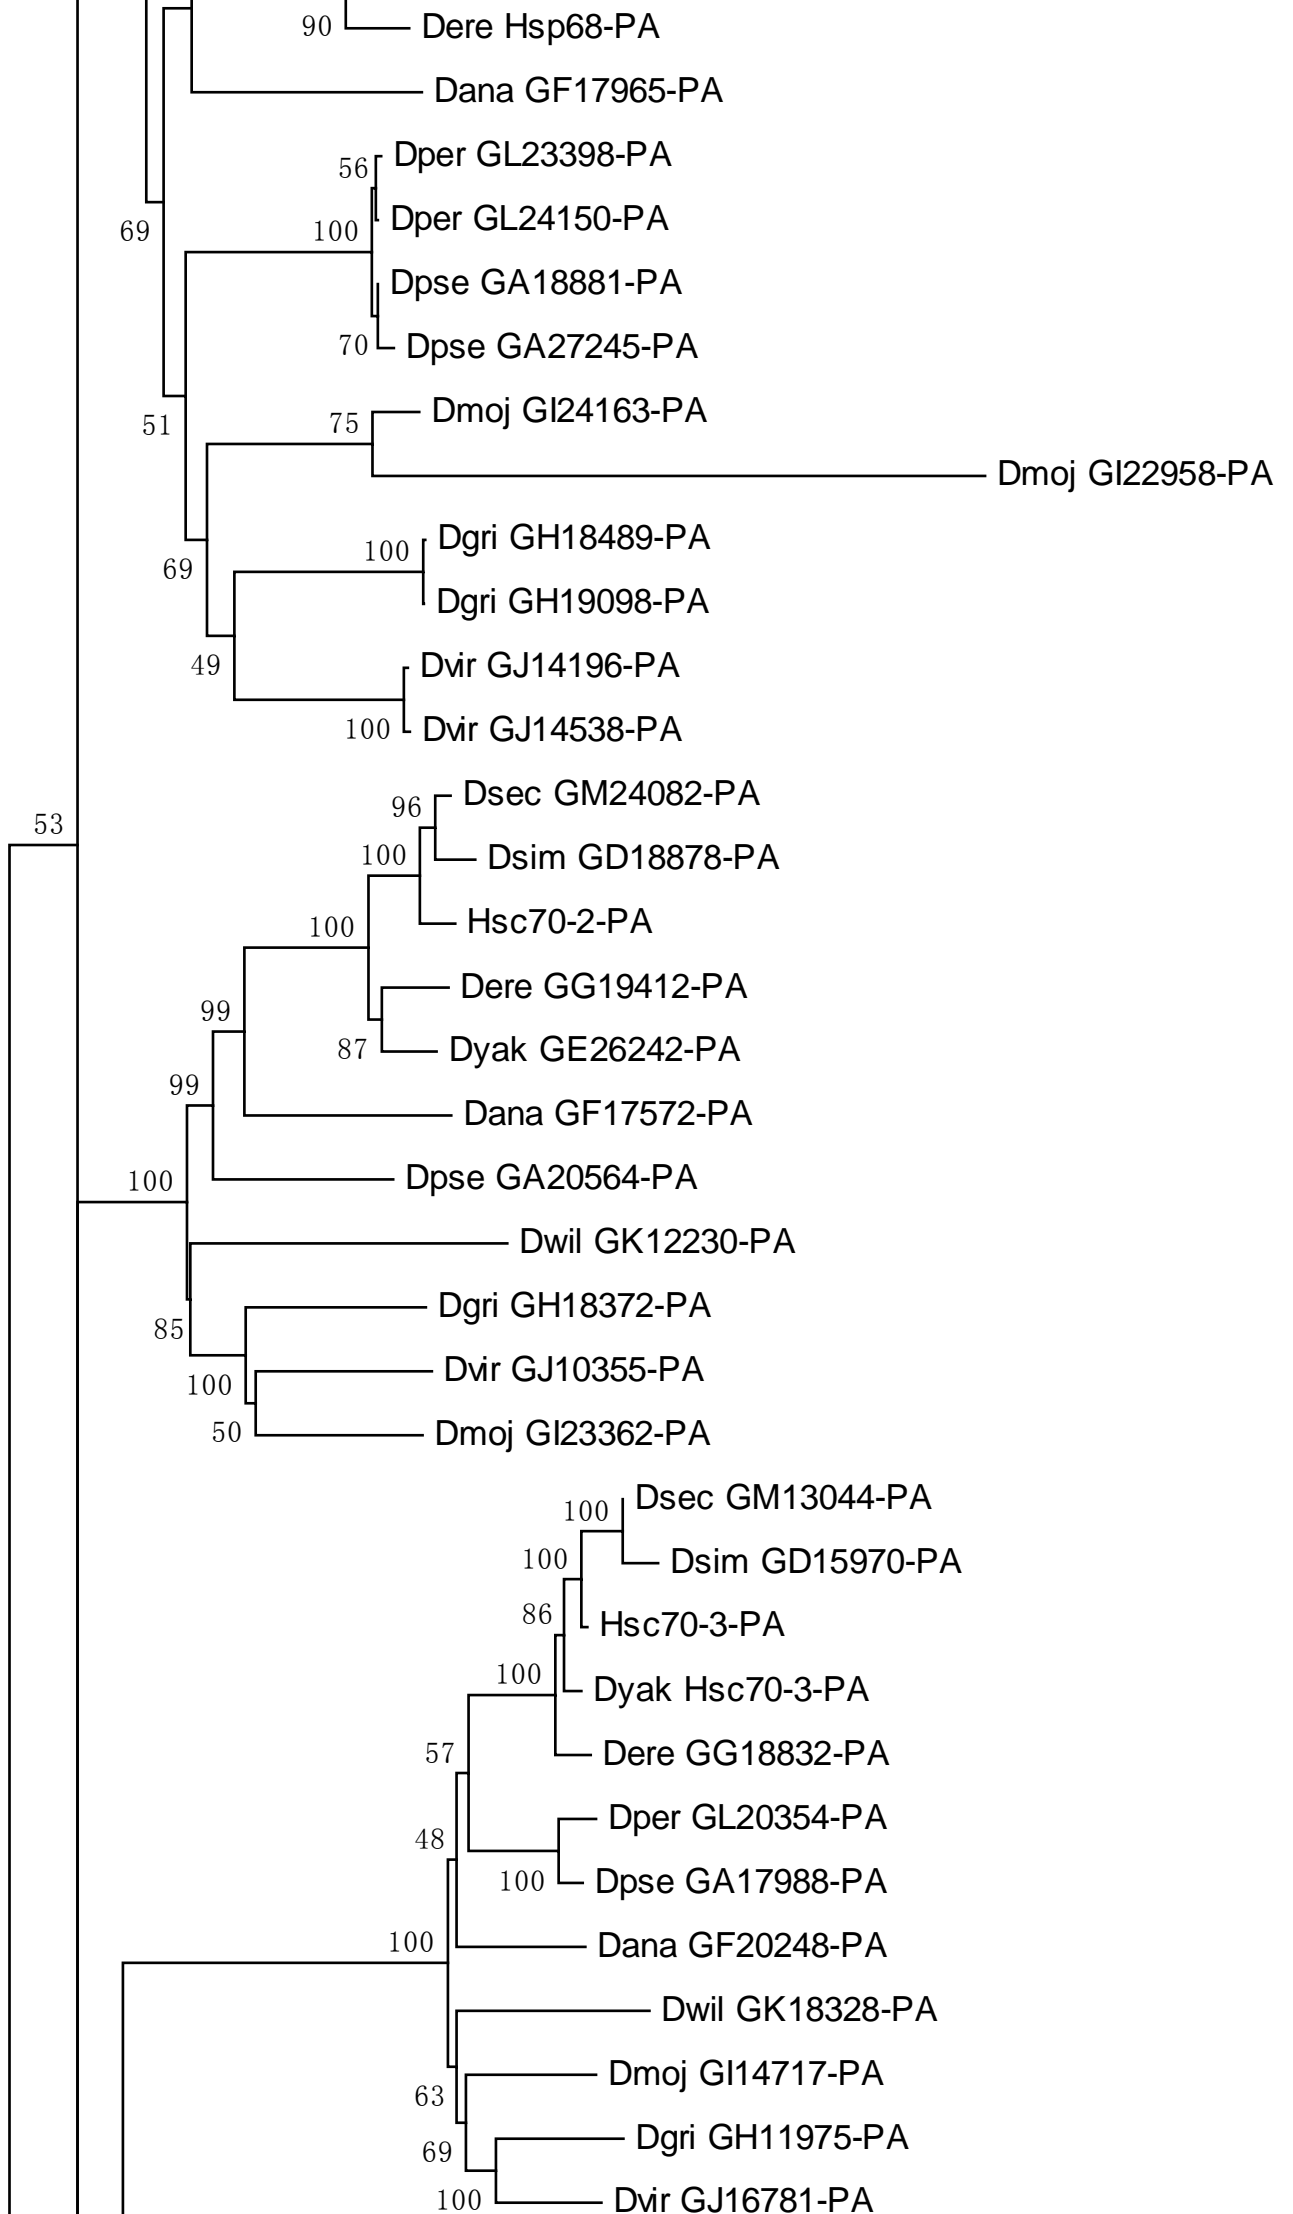

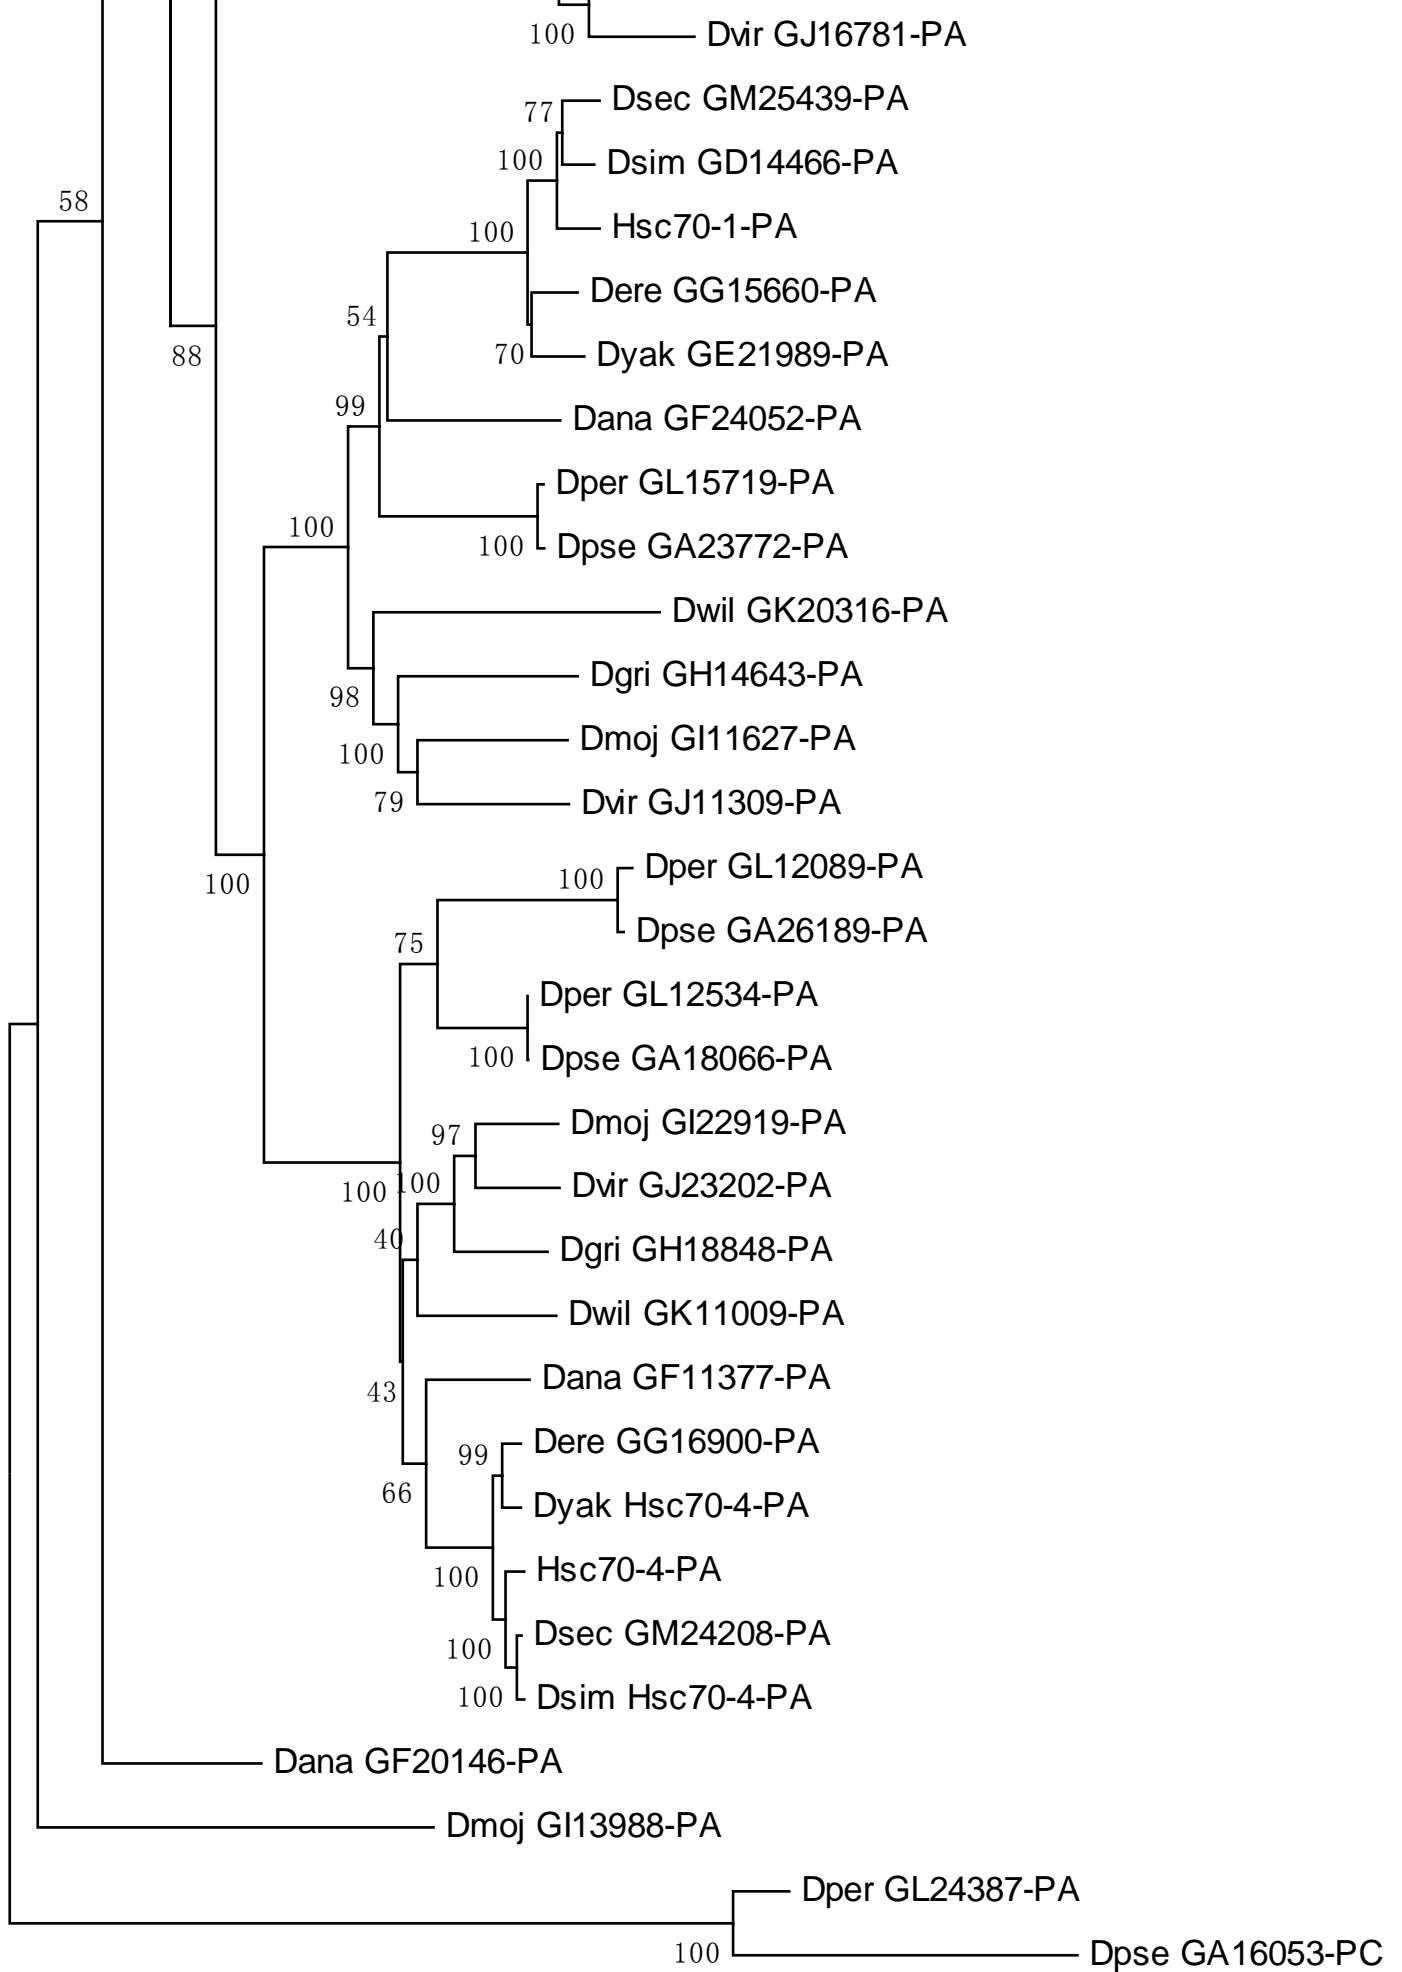

0.05
