# Supplementary material for: Functional requirements driving the gene duplication in 12 Drosophila species
Source: PubMed Central journal article supplement (PMC3751352; doi:10.1186/1471-2164-14-555), 2013-08-15

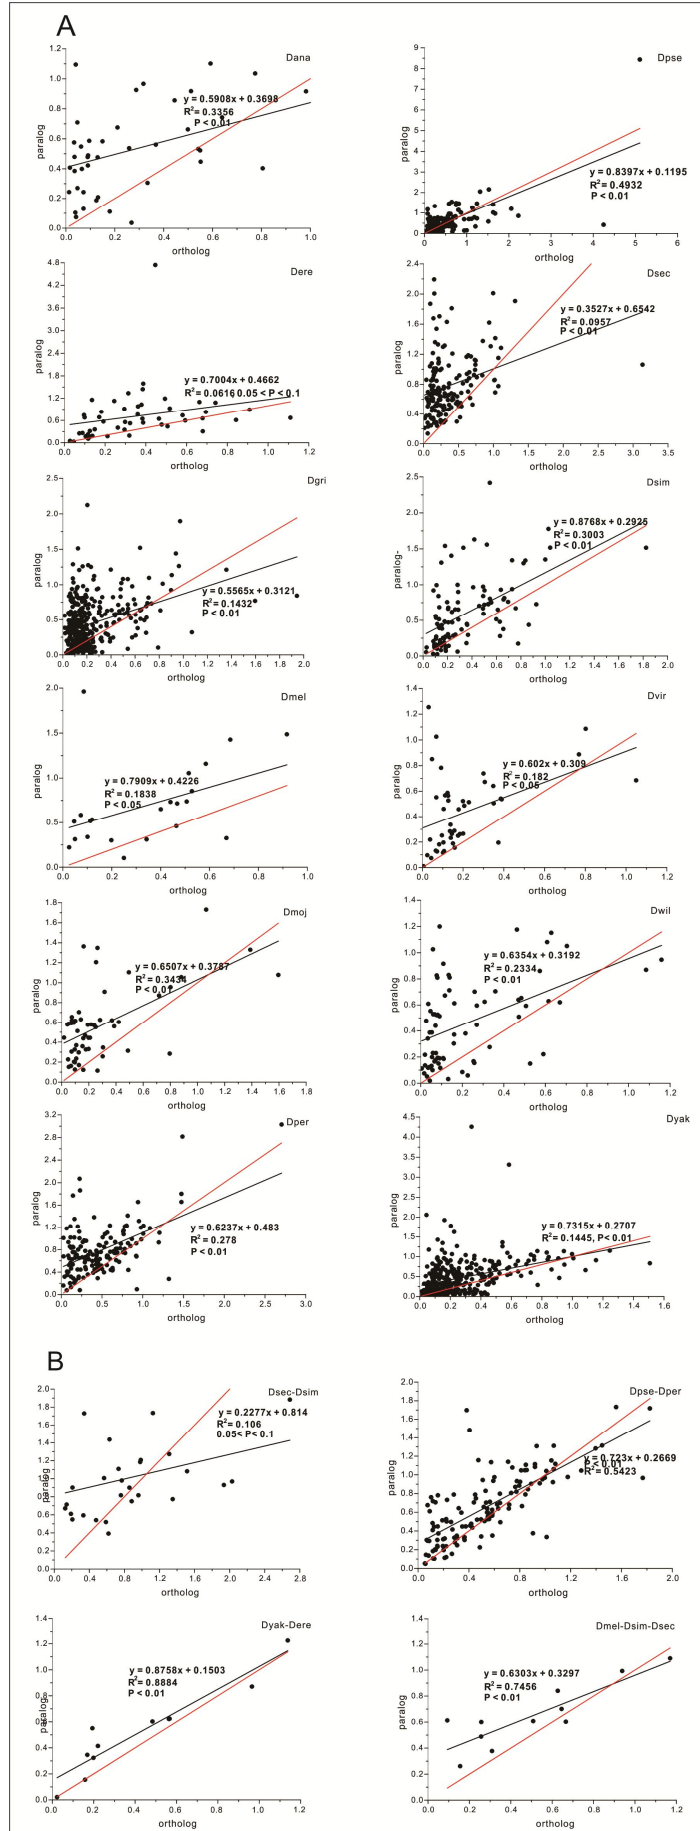

Supplement: 1471-2164-14-555-S5.pdf [file 1471-2164-14-555-S5.pdf]
